# Supplementary material for: C-type natriuretic peptide facilitates autonomic Ca2+ entry in growth plate chondrocytes for stimulating bone growth
Source: eLife. 2022 Mar 15;11:e71931. doi: 10.7554/eLife.71931 (PMC8923661; doi:10.7554/eLife.71931)
Supplement: Figure 1—figure supplement 1—source data 3. [file elife-71931-fig1-figsupp1-data3.xlsx]

## Sheet: Figure 1-figure supplement 1C
Figure 1-figure supplement 1C
Npr2fl/fl
18S		Npr2
Col2a1-Cre-/-	Col2a1-Cre+/-	Col2a1-Cre-/-	Col2a1-Cre+/-
80.4576	104.341	84.9448	43.818
113.784	95.0198	114.045	42.0331
89.5832	50.7437	98.938	28.0213
116.175	122.374	102.073	20.3006
