# Supplementary material for: C-type natriuretic peptide facilitates autonomic Ca2+ entry in growth plate chondrocytes for stimulating bone growth
Source: eLife. 2022 Mar 15;11:e71931. doi: 10.7554/eLife.71931 (PMC8923661; doi:10.7554/eLife.71931)
Supplement: Figure 1—figure supplement 1—source data 4. [file elife-71931-fig1-figsupp1-data4.xlsx]

## Sheet: Figure 1-figure supplement 1D
Figure 1-figure supplement 1D
Npr2fl/fl	Sox9	Sox5	Sox6	Runx2	Acan	Col10a1	Col2a1	18S	Actb	Gapdh
Col2a1-Cre-/-	7.95771e-09	2.85275e-09	9.82331e-11	3.97885e-09	2.48015e-08	7.37352e-09	3.97669e-06	0.000169081	9.95502e-08	2.44273e-07
	9.30079e-09	2.05246e-09	1.00995e-10	3.43987e-09	2.26643e-08	5.56875e-09	2.60552e-06	0.000239116	1.10841e-07	2.609e-07
	8.44064e-09	3.18734e-09	4.64671e-11	2.25379e-09	3.21635e-08	4.52323e-09	3.18561e-06	0.000188258	7.13753e-08	1.93656e-07
	5.12429e-09	1.53406e-09	6.77964e-11	2.87259e-09	2.79031e-08	1.11911e-09	7.07876e-07	0.000244141	2.6546e-07	2.6546e-07
Col2a1-Cre+/-	7.68664e-09	1.66135e-09	6.45854e-11	2.39887e-09	3.05342e-08	1.81171e-09	1.21552e-06	0.000219271	1.0094e-07	2.53766e-07
	5.56875e-09	1.21618e-09	3.00259e-11	1.32625e-09	3.03233e-08	3.78234e-10	7.43069e-07	0.000199683	8.57671e-08	1.65691e-07
	9.30079e-09	2.0172e-09	7.86916e-11	3.26561e-09	2.94941e-08	3.87005e-09	2.58752e-06	0.000106637	1.05958e-07	3.68968e-07
	1.41463e-08	3.35742e-09	1.19274e-10	3.47582e-09	3.11758e-08	8.64792e-09	3.51024e-06	0.000257168	7.38923e-08	2.57308e-07
