# Supplementary material for: C-type natriuretic peptide facilitates autonomic Ca2+ entry in growth plate chondrocytes for stimulating bone growth
Source: eLife. 2022 Mar 15;11:e71931. doi: 10.7554/eLife.71931 (PMC8923661; doi:10.7554/eLife.71931)
Supplement: Figure 1—figure supplement 2—source data 1. [file elife-71931-fig1-figsupp2-data1.xlsx]

## Sheet: Figure 1-figure supplement 2
Figure 1-figure supplement 2
	Npr1	Npr2	Npr3	Prkg1	Prkg2	Kcnma	Kcnmb1	Kcnmb2	Kcnmb3	Kcnmb4	Kcnn1	Kcnn2	Kcnn3	Kcnn4	Plcb1	Plcb2	Plcb3	Plcg1	Plcg2	Trpm7	Camk2a	Camk2b	Camk2d	Camk2g	Lpar1	Lpar2	Lpar3	Lpar4	Lpar5	Lpar6	Atp2a1	Atp2a2	Atp2a3	Pln	Pde2a	Pde3a	Pde3b	Pde5a	Pde6a	Pde6b	Pde6c	Pde6d	Pde6g	Pde6h	Pde10a	Sox9	Sox5	Sox6	Runx2
R	8.24935e-10	1.18956e-08	3.65839e-11	8.86028e-09	1.03117e-10	3.92408e-09			4.43607e-10	9.91272e-10	2.36081e-10	1.06384e-10	3.40884e-10	2.67452e-10	6.76154e-09	7.52248e-11	1.17883e-09	4.16222e-09	8.42269e-10	2.23523e-08	5.5259e-11	1.25204e-10		7.34801e-09	7.68664e-09	4.92871e-11	1.126e-11	1.52105e-13	8.20333e-11	5.93514e-10	1.28279e-10	8.15312e-09		2.70823e-09	1.51496e-10	4.39954e-09	3.7124e-09	1.86514e-10	6.8505e-11	1.86763e-11		5.17785e-09	7.09208e-11	2.19042e-11	5.65404e-10	6.08571e-08	4.49198e-09	6.53996e-10	1.25471e-09
		1.29896e-09	2.0651e-11	1.76829e-09	1.53284e-11	4.139e-10			1.05649e-10	1.85868e-10	2.09392e-11		1.9852e-10	3.70946e-11	4.06789e-10	9.41568e-13	9.00801e-11	4.90509e-10	3.89388e-11	3.13258e-09	2.77254e-11	4.59865e-11		1.32625e-09	7.23143e-10			3.84846e-10		1.90433e-10		8.56992e-10		6.72382e-10	2.88028e-11	4.40542e-10	6.40537e-10	3.92097e-11	2.13053e-11	1.64856e-11		1.34943e-09			7.78776e-11	6.62239e-09	1.30347e-09	8.58138e-11	2.46106e-10
	4.35986e-10	1.39515e-08	5.5259e-11	8.35334e-09	1.00995e-10	5.21386e-09			4.90509e-10	8.07958e-10	1.31885e-10	1.74628e-10	1.10902e-10	1.45829e-10	7.93018e-09	2.73072e-10	1.78677e-09	4.22032e-09	5.61498e-10	3.01138e-08	1.89117e-10	7.26624e-11		8.618e-09	6.76154e-09	1.65781e-10	3.22927e-11	2.22276e-09	7.1662e-11	5.83317e-10	9.52163e-11	9.04646e-09		3.20951e-09	1.87811e-10	3.3458e-09	5.01884e-09	2.249e-10	4.14453e-11	1.8292e-11		7.95771e-09	1.89117e-10	4.96299e-11	8.05163e-10	6.56787e-08	6.53122e-09	6.08088e-10	1.40187e-09
	3.90218e-10	1.05367e-08	3.65839e-11	7.32258e-09	1.91757e-10	3.83002e-09			4.83756e-10	6.49478e-10	1.5793e-10	1.33726e-10	1.72223e-10	2.47818e-10	5.82538e-09	2.26464e-10	1.05143e-09	4.07656e-09	5.65404e-10	2.54105e-08	1.24771e-10	8.3757e-11		7.07315e-09	5.80523e-09	9.99502e-11	2.39697e-11	2.75557e-09	7.1662e-11	4.97357e-10	3.4134e-11	7.272e-09		3.02588e-09	1.62933e-10	3.99267e-09	4.09071e-09	1.0205e-10	7.68055e-11	1.30243e-11		6.71484e-09	2.56557e-10		6.01799e-10	5.5229e-08	7.79394e-09	6.77059e-10	1.96885e-09
CH	5.99717e-10	2.43235e-09	1.08013e-11	1.92833e-09	1.40674e-09	2.31715e-09	2.73072e-10		2.369e-10	1.37486e-10	4.35058e-11		8.31784e-11	7.26624e-11	1.32166e-09	9.18501e-10	5.0605e-10	1.30347e-09	8.19237e-10	6.95164e-09	2.252e-11	4.79393e-11		2.19977e-09	3.04692e-09	6.64012e-11	4.11041e-10	1.91094e-10	5.76056e-11	5.49943e-10		5.14208e-09		2.17702e-09	2.88642e-10	1.10754e-09	8.45193e-10	1.06016e-10	1.16415e-10	6.80318e-11		1.7259e-09	9.65455e-11	7.68055e-11	4.67278e-10	2.47156e-08	1.78059e-09	1.5045e-10	5.94779e-09
	6.88893e-10	3.08946e-09	9.35806e-11	5.98916e-09	2.88256e-09	4.8816e-09	1.53079e-10		2.04101e-10	1.03117e-10	1.29619e-10	7.47052e-11		5.72077e-11	1.46648e-09	8.93384e-10	8.54027e-10	1.95525e-09	3.57832e-10	8.64792e-09	2.38548e-10	4.55108e-11		2.80374e-09	4.74811e-09	1.3419e-10	2.13507e-10	4.77096e-10	3.98102e-12	6.40537e-10		8.01306e-09		3.72529e-09	2.84668e-10	1.4818e-09	1.21618e-09	6.9221e-11	3.82699e-11	3.50936e-11		2.88256e-09		4.91165e-11	4.31476e-10	3.50746e-08	2.45778e-09	2.11298e-10	5.84561e-09
	5.22084e-10	3.87005e-09	4.58274e-11	5.43527e-09	3.64862e-09	6.13623e-09	6.73281e-11		1.19688e-10	2.08389e-10	8.17495e-11	1.79155e-11	1.05284e-10	4.17336e-11	2.14705e-09	8.96486e-10	8.84144e-10	1.62716e-09	5.34904e-10	1.30173e-08	1.14813e-10	4.76082e-11		3.23183e-09	6.09385e-09	1.66934e-10	3.24739e-10	4.08201e-10		7.51244e-10		8.76864e-09		3.77729e-09	5.46144e-10	1.90178e-09	1.62716e-09	8.64106e-11	4.41132e-11	1.46531e-11		3.29974e-09	9.16547e-11	8.61117e-11	6.10199e-10	4.17109e-08	2.9636e-09	2.66527e-10	7.5024e-09
	3.08288e-10	3.95137e-09	1.38923e-10	7.29725e-09	3.77729e-09	5.39773e-09	7.57481e-11		9.29342e-11	7.57481e-11	8.3757e-11	7.32657e-12	6.13137e-11		1.64416e-09	6.14444e-10	7.61731e-10	2.54445e-09	6.27355e-10	1.39033e-08	5.3192e-11	1.44822e-10		1.95525e-09	5.43527e-09	1.16013e-10	2.41041e-10	6.63125e-10	8.49262e-11	4.75446e-10		9.89948e-09		3.9105e-09	1.71628e-10	1.61592e-09	1.36354e-09	7.65397e-11	4.30558e-11	1.77918e-11		2.59791e-09	1.83946e-10	3.92097e-11	2.75926e-10	4.043e-08	2.82324e-09	3.45643e-10	5.8659e-09
[truncated: 7 more columns]
