# Supplementary material for: C-type natriuretic peptide facilitates autonomic Ca2+ entry in growth plate chondrocytes for stimulating bone growth
Source: eLife. 2022 Mar 15;11:e71931. doi: 10.7554/eLife.71931 (PMC8923661; doi:10.7554/eLife.71931)
Supplement: Figure 1—source data 1. [file elife-71931-fig1-data1.xlsx]

## Sheet: trace
Figure 1A
Vehicle					30 nM CNP					300 nM CNP					300 nM ANP
Times (s)	Cell1	Cell2	Cell3		Times (s)	Cell1	Cell2	Cell3		Times (s)	Cell1	Cell2	Cell3		Times (s)	Cell1	Cell2	Cell3
0	0.216814	0.178538	0.203752		0	0.199683	0.236807	0.171707		0	0.218065	0.175545	0.2394		0	0.16875	0.174599	0.186612
1	0.215961	0.180703	0.201974		1	0.201279	0.235038	0.172601		1	0.214342	0.177277	0.24036		1	0.17266	0.175835	0.188338
2	0.216794	0.179271	0.201519		2	0.201111	0.234612	0.172669		2	0.213295	0.177832	0.240636		2	0.174905	0.175387	0.188648
3	0.216978	0.178555	0.201067		3	0.202503	0.232639	0.17348		3	0.21274	0.175858	0.235635		3	0.177969	0.177187	0.187558
4	0.216537	0.178585	0.20198		4	0.203884	0.235097	0.173797		4	0.210415	0.176415	0.233924		4	0.179837	0.180021	0.186659
5	0.217518	0.177719	0.202144		5	0.201234	0.234112	0.174989		5	0.213954	0.177174	0.233454		5	0.179881	0.179605	0.187879
6	0.216861	0.17646	0.203502		6	0.199806	0.235951	0.173183		6	0.218606	0.17418	0.227364		6	0.178481	0.179562	0.186914
7	0.215227	0.176192	0.20415		7	0.200203	0.239358	0.173838		7	0.217357	0.172964	0.227408		7	0.177966	0.180206	0.186035
8	0.213027	0.176616	0.203142		8	0.199934	0.241892	0.171578		8	0.216724	0.176872	0.230955		8	0.176284	0.179721	0.188236
9	0.211319	0.178936	0.20266		9	0.200192	0.242866	0.1704		9	0.216695	0.179378	0.235569		9	0.175157	0.178536	0.19029
10	0.209122	0.175371	0.201221		10	0.200805	0.244678	0.169518		10	0.215614	0.182154	0.234366		10	0.177461	0.179923	0.19081
11	0.209116	0.17483	0.198696		11	0.201456	0.245369	0.17087		11	0.2157	0.187108	0.237142		11	0.178415	0.17891	0.192844
12	0.208955	0.176828	0.197987		12	0.201499	0.242319	0.170512		12	0.218352	0.193334	0.234111		12	0.179507	0.178862	0.195046
13	0.209437	0.178909	0.197688		13	0.201504	0.242493	0.173373		13	0.222486	0.197466	0.230027		13	0.180343	0.17839	0.196661
14	0.211574	0.177279	0.197065		14	0.203156	0.239401	0.174402		14	0.224436	0.199869	0.225625		14	0.183109	0.180175	0.197427
15	0.213613	0.177885	0.197095		15	0.204221	0.236526	0.175871		15	0.229777	0.202613	0.228347		15	0.18191	0.179526	0.197895
16	0.214664	0.178804	0.198311		16	0.204762	0.234039	0.174971		16	0.230408	0.206926	0.227899		16	0.179872	0.179242	0.197587
17	0.214616	0.177848	0.198369		17	0.205055	0.23005	0.175865		17	0.23436	0.209667	0.229788		17	0.17724	0.179803	0.196716
18	0.217728	0.175475	0.199601		18	0.205009	0.226185	0.176406		18	0.234718	0.211992	0.231304		18	0.177736	0.182057	0.196107
19	0.216213	0.176455	0.199647		19	0.20443	0.222733	0.17992		19	0.239871	0.212772	0.233945		19	0.173821	0.181359	0.194751
20	0.214106	0.176495	0.197449		20	0.20392	0.219115	0.179589		20	0.238517	0.214616	0.233216		20	0.176331	0.181699	0.194653
21	0.21356	0.175769	0.19846		21	0.202103	0.216356	0.183236		21	0.241739	0.215268	0.235229		21	0.176793	0.183938	0.193104
22	0.212477	0.17658	0.199443		22	0.201433	0.215951	0.185778		22	0.243706	0.216716	0.234636		22	0.176113	0.186305	0.192499
23	0.209981	0.17688	0.199683		23	0.200229	0.215634	0.185482		23	0.248612	0.215668	0.236789		23	0.174954	0.188904	0.192504
24	0.210226	0.177639	0.201319		24	0.199705	0.215346	0.182533		24	0.249287	0.214526	0.233625		24	0.177712	0.192053	0.192379
25	0.210675	0.179805	0.20306		25	0.199206	0.214623	0.180445		25	0.250019	0.211673	0.231654		25	0.174703	0.19718	0.192274
26	0.211806	0.182523	0.20378		26	0.2029	0.215543	0.179709		26	0.253289	0.208921	0.232406		26	0.175036	0.201744	0.194017
27	0.212529	0.179298	0.201705		27	0.201931	0.216943	0.175888		27	0.257229	0.203281	0.233629		27	0.174384	0.207272	0.192013
28	0.211241	0.180714	0.200458		28	0.20423	0.216785	0.175611		28	0.254176	0.201576	0.232472		28	0.172714	0.211679	0.190521
29	0.209773	0.178429	0.197287		29	0.202928	0.216334	0.176018		29	0.254415	0.204068	0.233683		29	0.169456	0.216769	0.190026
30	0.207435	0.180031	0.198022		30	0.203772	0.218435	0.179256		30	0.258541	0.206976	0.234322		30	0.166376	0.219483	0.189125
31	0.204792	0.177898	0.194512		31	0.203007	0.219071	0.177179		31	0.261871	0.207527	0.232539		31	0.163115	0.223625	0.186703
32	0.204404	0.180164	0.194257		32	0.205279	0.218896	0.176924		32	0.260005	0.210551	0.231682		32	0.16311	0.224129	0.189272
33	0.202765	0.177938	0.192425		33	0.204613	0.218293	0.177254		33	0.267602	0.212798	0.228912		33	0.164075	0.225867	0.188362
34	0.204272	0.179589	0.19367		34	0.205588	0.219102	0.177779		34	0.271805	0.211682	0.231218		34	0.164245	0.22664	0.187397
35	0.206096	0.178012	0.189271		35	0.20438	0.218036	0.178609		35	0.273904	0.212064	0.230956		35	0.165745	0.229258	0.18717
36	0.206877	0.176574	0.19054		36	0.204162	0.217071	0.179709		36	0.271834	0.214585	0.228765		36	0.165247	0.23323	0.187352
37	0.205431	0.178382	0.189235		37	0.202566	0.214885	0.183543		37	0.27505	0.213649	0.229958		37	0.164674	0.235779	0.18683
38	0.206226	0.179478	0.190936		38	0.201019	0.215789	0.184068		38	0.271549	0.214035	0.232599		38	0.162405	0.235638	0.187073
39	0.203533	0.178433	0.189346		39	0.199946	0.214903	0.183426		39	0.270716	0.213941	0.228525		39	0.15877	0.235742	0.187365
40	0.203373	0.177117	0.19285		40	0.200233	0.214318	0.18536		40	0.271748	0.213706	0.228207		40	0.156868	0.234165	0.187046
41	0.204873	0.178712	0.194329		41	0.197285	0.21425	0.187363		41	0.275046	0.212942	0.229629		41	0.156485	0.230318	0.186857
42	0.207334	0.179115	0.193622		42	0.195791	0.213989	0.187945		42	0.275396	0.215531	0.227081		42	0.156443	0.227533	0.187405
43	0.210686	0.176161	0.191106		43	0.195948	0.21089	0.190767		43	0.277501	0.214602	0.228254		43	0.158652	0.227819	0.187425
44	0.215521	0.175987	0.19008		44	0.195836	0.210911	0.194425		44	0.281951	0.214968	0.230305		44	0.161314	0.225248	0.188008
45	0.217905	0.176863	0.188736		45	0.19594	0.208678	0.194573		45	0.281982	0.21455	0.230459		45	0.160309	0.222333	0.188142
46	0.217661	0.175742	0.186114		46	0.197887	0.205123	0.197784		46	0.28309	0.213655	0.233004		46	0.162799	0.219714	0.189094
47	0.218969	0.175892	0.188276		47	0.200245	0.20362	0.201422		47	0.285128	0.211055	0.232018		47	0.163695	0.217908	0.188452
48	0.21874	0.180461	0.191029		48	0.200601	0.203615	0.205825		48	0.284965	0.207145	0.229732		48	0.164327	0.212401	0.188376
49	0.2192	0.181348	0.193538		49	0.199729	0.203097	0.208457		49	0.279747	0.20514	0.227287		49	0.164819	0.2085	0.188151
50	0.218298	0.183432	0.194874		50	0.199557	0.205339	0.211852		50	0.284283	0.20358	0.226011		50	0.167282	0.208337	0.188385
51	0.219691	0.185023	0.196923		51	0.196619	0.204851	0.214898		51	0.278324	0.200603	0.226506		51	0.167876	0.205735	0.187918
52	0.220209	0.181985	0.196996		52	0.195035	0.205324	0.214146		52	0.281343	0.199178	0.22693		52	0.168236	0.204162	0.189034
53	0.219838	0.181621	0.197412		53	0.193679	0.205651	0.213855		53	0.28407	0.200045	0.231101		53	0.167498	0.203742	0.188461
54	0.21707	0.182254	0.196976		54	0.194683	0.207668	0.21444		54	0.285851	0.199166	0.233429		54	0.168697	0.201702	0.189059
55	0.218383	0.179509	0.20027		55	0.196179	0.206878	0.213374		55	0.279699	0.199208	0.229216		55	0.169095	0.199596	0.188827
56	0.216868	0.177305	0.20356		56	0.19675	0.209664	0.212916		56	0.282833	0.200898	0.222575		56	0.167963	0.196229	0.188836
57	0.217063	0.177146	0.207053		57	0.197057	0.209938	0.21283		57	0.279561	0.199507	0.221861		57	0.166172	0.192517	0.187818
58	0.217731	0.176405	0.208904		58	0.198088	0.20942	0.209944		58	0.277056	0.19844	0.216811		58	0.165778	0.191182	0.189496
59	0.219031	0.177466	0.21374		59	0.199048	0.207026	0.210035		59	0.2778	0.199377	0.218786		59	0.164478	0.191197	0.190948
60	0.216893	0.178714	0.215514		60	0.197334	0.208005	0.210566		60	0.283761	0.199823	0.224312		60	0.164111	0.189088	0.19367
61	0.215337	0.176525	0.214513		61	0.19788	0.207249	0.210255		61	0.292652	0.198411	0.225398		61	0.163543	0.190362	0.194928
62	0.212976	0.177868	0.215585		62	0.197858	0.208623	0.213501		62	0.299216	0.198669	0.228665		62	0.164526	0.188786	0.197085
63	0.209969	0.177474	0.216474		63	0.197927	0.20978	0.217724		63	0.30116	0.199001	0.228018		63	0.163692	0.187015	0.197874
64	0.206953	0.172389	0.217385		64	0.196698	0.210749	0.219772		64	0.311152	0.196502	0.221425		64	0.164003	0.186021	0.197918
65	0.205354	0.171419	0.215839		65	0.19626	0.210503	0.221694		65	0.30795	0.194307	0.216687		65	0.164549	0.186445	0.197405
66	0.203043	0.174382	0.21441		66	0.195565	0.209568	0.222459		66	0.304502	0.192849	0.217247		66	0.166016	0.183815	0.197083
67	0.201399	0.17351	0.212938		67	0.193967	0.210795	0.22127		67	0.301351	0.190729	0.211433		67	0.164281	0.184657	0.195993
68	0.201074	0.172783	0.212664		68	0.194676	0.210713	0.220669		68	0.30821	0.191303	0.210039		68	0.164341	0.184803	0.198132
69	0.200497	0.17706	0.21165		69	0.195492	0.20903	0.220583		69	0.301224	0.192556	0.210594		69	0.166713	0.185388	0.199017
70	0.200019	0.172551	0.2099		70	0.196408	0.20885	0.220622		70	0.309086	0.191751	0.217067		70	0.167272	0.182953	0.199038
71	0.201766	0.172728	0.209353		71	0.197491	0.208098	0.22127		71	0.307506	0.193553	0.21798		71	0.16621	0.183859	0.200624
72	0.201641	0.171732	0.208303		72	0.199559	0.206966	0.224294		72	0.308382	0.195932	0.222668		72	0.165722	0.182803	0.201965
73	0.201626	0.174597	0.205228		73	0.199563	0.207248	0.227433		73	0.302755	0.194644	0.224984		73	0.165404	0.18427	0.200652
74	0.20321	0.172923	0.204335		74	0.20011	0.211929	0.229134		74	0.305964	0.195306	0.227053		74	0.162475	0.185067	0.201147
75	0.204411	0.176716	0.204099		75	0.201652	0.214593	0.229448		75	0.299275	0.197485	0.221022		75	0.160942	0.186055	0.202182
76	0.204278	0.178462	0.20549		76	0.203683	0.22129	0.231497		76	0.300691	0.196749	0.219145		76	0.159892	0.186251	0.20269
77	0.204976	0.179605	0.205114		77	0.204212	0.2246	0.231503		77	0.304302	0.196882	0.218048		77	0.161559	0.188729	0.202508
78	0.2071	0.177663	0.206382		78	0.203865	0.229531	0.230119		78	0.311815	0.199593	0.216936		78	0.163429	0.189974	0.202337
79	0.206636	0.177579	0.204948		79	0.207746	0.230389	0.23036		79	0.314327	0.196575	0.217803		79	0.163537	0.189887	0.202944
80	0.207256	0.17778	0.204095		80	0.20967	0.232489	0.229524		80	0.319496	0.197177	0.220287		80	0.162951	0.190586	0.203163
81	0.20634	0.175205	0.204151		81	0.212651	0.234495	0.229179		81	0.324417	0.196751	0.220243		81	0.164683	0.191588	0.202836
82	0.206882	0.175815	0.205808		82	0.217034	0.240008	0.226187		82	0.323674	0.195801	0.221867		82	0.165735	0.191244	0.202263
83	0.205325	0.176984	0.208936		83	0.222724	0.24127	0.222212		83	0.321831	0.193117	0.224076		83	0.162578	0.189076	0.204273
84	0.204577	0.176855	0.20951		84	0.222679	0.24617	0.217471		84	0.322566	0.194147	0.225882		84	0.160614	0.186215	0.203883
85	0.20291	0.175842	0.211338		85	0.224801	0.250238	0.21785		85	0.325606	0.1918	0.230692		85	0.157573	0.185305	0.204226
86	0.202703	0.174351	0.212158		86	0.227167	0.252806	0.216512		86	0.325791	0.192647	0.236021		86	0.156599	0.185041	0.20542
87	0.200365	0.17219	0.213505		87	0.227487	0.253484	0.21737		87	0.325316	0.194642	0.239314		87	0.15502	0.184077	0.209229
88	0.19979	0.1712	0.21326		88	0.227945	0.25673	0.219764		88	0.321089	0.196636	0.241158		88	0.155266	0.183429	0.21151
89	0.200667	0.173286	0.216557		89	0.228882	0.257676	0.222608		89	0.318411	0.199752	0.24501		89	0.157706	0.185601	0.214366
90	0.203966	0.175468	0.217053		90	0.229347	0.25637	0.221541		90	0.315883	0.201056	0.243851		90	0.16099	0.184906	0.216724
91	0.203409	0.176878	0.21834		91	0.228617	0.254288	0.223366		91	0.318119	0.203459	0.245022		91	0.16165	0.183118	0.219797
92	0.204636	0.176816	0.216428		92	0.22871	0.252019	0.226006		92	0.316383	0.201203	0.241955		92	0.163177	0.184143	0.220813
93	0.20622	0.176509	0.215727		93	0.227011	0.248206	0.225098		93	0.319518	0.201539	0.243781		93	0.168453	0.183207	0.219868
94	0.204863	0.174965	0.21269		94	0.226863	0.244754	0.222507		94	0.322095	0.201623	0.239542		94	0.172782	0.183041	0.21867
95	0.20251	0.173984	0.21229		95	0.224501	0.242621	0.224615		95	0.323054	0.202226	0.241034		95	0.175738	0.183287	0.218395
96	0.206183	0.175497	0.213235		96	0.221994	0.242815	0.221922		96	0.311398	0.201269	0.243731		96	0.180098	0.185074	0.218793
97	0.20785	0.176112	0.215761		97	0.219997	0.241084	0.219493		97	0.308281	0.20439	0.24767		97	0.183567	0.18461	0.217671
98	0.208718	0.178104	0.215364		98	0.219197	0.242962	0.223118		98	0.308737	0.20417	0.244148		98	0.186495	0.186781	0.219778
99	0.212411	0.176781	0.215474		99	0.220071	0.240504	0.227133		99	0.305916	0.202752	0.245919		99	0.189325	0.18767	0.221753
100	0.214228	0.175517	0.214947		100	0.222943	0.240201	0.225525		100	0.303961	0.201787	0.245738		100	0.193238	0.190004	0.223089
101	0.215175	0.171969	0.212536		101	0.224703	0.237838	0.229121		101	0.312841	0.199867	0.246159		101	0.196066	0.191379	0.221268
102	0.217519	0.171787	0.209669		102	0.227851	0.238285	0.230168		102	0.316731	0.19849	0.246331		102	0.20055	0.19373	0.221051
103	0.217062	0.169538	0.208717		103	0.232855	0.236665	0.228838		103	0.317907	0.198839	0.253429		103	0.202169	0.194725	0.218473
104	0.214389	0.172187	0.208194		104	0.234839	0.237078	0.23064		104	0.318404	0.198785	0.26062		104	0.204859	0.196964	0.215994
105	0.212853	0.172776	0.20527		105	0.23756	0.236223	0.235197		105	0.317685	0.198379	0.269633		105	0.206997	0.197927	0.212863
106	0.211461	0.178118	0.202312		106	0.240066	0.235585	0.237469		106	0.313641	0.197568	0.272115		106	0.208467	0.199743	0.213943
107	0.20825	0.181029	0.202955		107	0.243728	0.232686	0.240962		107	0.313518	0.194133	0.279912		107	0.206627	0.201802	0.213229
108	0.206101	0.181356	0.202047		108	0.244497	0.230658	0.242731		108	0.307905	0.19226	0.282353		108	0.205113	0.204323	0.212574
109	0.204814	0.179985	0.202287		109	0.245897	0.228067	0.243691		109	0.305063	0.191406	0.285579		109	0.203823	0.207007	0.212258
110	0.202958	0.180333	0.202022		110	0.247786	0.224194	0.24573		110	0.305343	0.189801	0.284642		110	0.202258	0.209779	0.212628
111	0.198916	0.177244	0.202444		111	0.253507	0.219157	0.248042		111	0.304569	0.188847	0.285378		111	0.200423	0.211954	0.211168
112	0.196819	0.17706	0.199403		112	0.258026	0.217546	0.252091		112	0.297338	0.189526	0.281923		112	0.202567	0.213802	0.210723
113	0.19604	0.177834	0.20189		113	0.259535	0.213185	0.254932		113	0.301175	0.188112	0.285294		113	0.202371	0.213097	0.210166
114	0.195021	0.177174	0.199594		114	0.263182	0.21168	0.257315		114	0.302269	0.186255	0.283664		114	0.203309	0.213288	0.208979
115	0.195747	0.1796	0.19958		115	0.264348	0.211163	0.261062		115	0.301313	0.185145	0.287278		115	0.204468	0.213204	0.209316
116	0.197671	0.180665	0.200794		116	0.261801	0.213239	0.262957		116	0.302116	0.185744	0.292011		116	0.204721	0.214447	0.208117
117	0.199697	0.181035	0.201391		117	0.258323	0.211865	0.261287		117	0.30914	0.184631	0.296178		117	0.205964	0.213103	0.208179
118	0.199595	0.179326	0.19645		118	0.258096	0.211355	0.264617		118	0.307027	0.183657	0.297834		118	0.208043	0.214513	0.207302
119	0.20055	0.181367	0.197394		119	0.255976	0.210848	0.264688		119	0.304171	0.183343	0.29769		119	0.206744	0.212989	0.207416
120	0.201665	0.180008	0.198507		120	0.256445	0.209894	0.260133		120	0.297281	0.185096	0.303777		120	0.207721	0.211553	0.205661
121	0.202235	0.181033	0.19683		121	0.256169	0.208001	0.25651		121	0.28905	0.18407	0.307938		121	0.210363	0.209899	0.20423
122	0.202633	0.180373	0.194891		122	0.25564	0.207055	0.253728		122	0.285389	0.184305	0.305993		122	0.207633	0.209002	0.20226
123	0.204224	0.181963	0.196585		123	0.254528	0.206089	0.249494		123	0.278378	0.18818	0.305678		123	0.207346	0.20504	0.201633
124	0.205306	0.182252	0.195776		124	0.254559	0.205403	0.246363		124	0.275163	0.189968	0.309191		124	0.209839	0.201763	0.19976
125	0.20469	0.182881	0.197181		125	0.253477	0.207341	0.245408		125	0.27589	0.190127	0.303143		125	0.20702	0.20029	0.199826
126	0.20314	0.180763	0.198477		126	0.254527	0.207398	0.244854		126	0.280512	0.191672	0.297063		126	0.204605	0.197714	0.199775
127	0.200753	0.18435	0.20043		127	0.2544	0.208762	0.243916		127	0.281854	0.192991	0.302128		127	0.202843	0.195211	0.200416
128	0.200971	0.184569	0.201523		128	0.255302	0.210279	0.243645		128	0.281229	0.190266	0.304336		128	0.201443	0.195288	0.202223
129	0.199674	0.184302	0.199022		129	0.254356	0.209921	0.247333		129	0.282998	0.192168	0.307095		129	0.198349	0.197085	0.203771
130	0.199819	0.185266	0.197754		130	0.254056	0.208009	0.247663		130	0.279238	0.192329	0.307746		130	0.198308	0.196804	0.203214
131	0.202159	0.191062	0.195989		131	0.250163	0.208101	0.249013		131	0.272827	0.194959	0.309979		131	0.199181	0.196144	0.203536
132	0.203071	0.187355	0.194209		132	0.247868	0.205851	0.250267		132	0.264988	0.194613	0.304553		132	0.200217	0.196003	0.202744
133	0.202537	0.189997	0.190851		133	0.244274	0.204364	0.251037		133	0.261596	0.196468	0.300592		133	0.197837	0.194735	0.201492
134	0.202263	0.1934	0.19435		134	0.241697	0.203344	0.247526		134	0.258116	0.198096	0.301903		134	0.197666	0.192512	0.200305
135	0.202527	0.19919	0.192672		135	0.238971	0.201936	0.244828		135	0.258831	0.200827	0.300929		135	0.197458	0.19251	0.200312
136	0.202535	0.199219	0.193593		136	0.238443	0.199898	0.240413		136	0.258856	0.201774	0.298537		136	0.192735	0.191451	0.199513
137	0.204007	0.203585	0.195118		137	0.239685	0.198773	0.23872		137	0.256689	0.207456	0.297234		137	0.190932	0.190295	0.199386
138	0.203971	0.204764	0.197397		138	0.240381	0.196356	0.234622		138	0.258983	0.2097	0.295499		138	0.191507	0.19103	0.199106
139	0.206028	0.206322	0.194665		139	0.23882	0.19555	0.23129		139	0.262613	0.210724	0.287168		139	0.187614	0.190849	0.197719
140	0.204317	0.203341	0.197261		140	0.238355	0.194277	0.231431		140	0.262567	0.211036	0.282916		140	0.185374	0.189738	0.198147
141	0.202001	0.201615	0.197409		141	0.237304	0.19241	0.228222		141	0.265322	0.212956	0.27811		141	0.188359	0.188877	0.198194
142	0.199454	0.201517	0.19613		142	0.233959	0.191895	0.225493		142	0.272633	0.21361	0.279136		142	0.187286	0.188683	0.198436
143	0.199023	0.202162	0.19569		143	0.234429	0.192103	0.224542		143	0.273529	0.214916	0.278955		143	0.186739	0.186714	0.199186
144	0.199424	0.201626	0.19569		144	0.234148	0.190938	0.22314		144	0.272692	0.213011	0.276868		144	0.188667	0.185559	0.201554
145	0.202077	0.20041	0.193561		145	0.233157	0.189465	0.220908		145	0.275577	0.213002	0.270234		145	0.190374	0.183441	0.202898
146	0.205608	0.200426	0.192612		146	0.232422	0.188617	0.221616		146	0.278015	0.211929	0.269745		146	0.187638	0.182431	0.20441
147	0.210731	0.198648	0.193074		147	0.231505	0.187922	0.219864		147	0.275382	0.209941	0.261431		147	0.188484	0.181226	0.205674
148	0.214345	0.198007	0.190498		148	0.229342	0.186933	0.217307		148	0.275772	0.210081	0.255457		148	0.189333	0.179751	0.206609
149	0.216941	0.198744	0.189681		149	0.231223	0.186575	0.212301		149	0.274725	0.210773	0.249516		149	0.188716	0.177033	0.206372
150	0.220921	0.199067	0.188844		150	0.231101	0.187465	0.207009		150	0.27809	0.211783	0.249622		150	0.188734	0.177342	0.204308
151	0.228453	0.197151	0.19046		151	0.231614	0.186758	0.201718		151	0.276522	0.210915	0.244491		151	0.189632	0.176724	0.202914
152	0.231999	0.196956	0.191335		152	0.230618	0.185533	0.199604		152	0.276545	0.210408	0.242542		152	0.191199	0.175124	0.201379
153	0.235302	0.196737	0.193313		153	0.230956	0.18606	0.196985		153	0.27359	0.210143	0.241438		153	0.192479	0.175839	0.198335
154	0.239297	0.194493	0.193561		154	0.229666	0.1867	0.19967		154	0.274574	0.213128	0.240533		154	0.194147	0.17717	0.1981
155	0.239957	0.19793	0.194938		155	0.229199	0.187942	0.201035		155	0.271586	0.211238	0.239625		155	0.193355	0.176515	0.197323
156	0.23667	0.201555	0.194654		156	0.229006	0.190723	0.202702		156	0.271607	0.211498	0.241957		156	0.192857	0.17491	0.195641
157	0.23346	0.203241	0.193717		157	0.230708	0.193768	0.202162		157	0.273483	0.210508	0.24466		157	0.190639	0.175173	0.195787
158	0.233299	0.204763	0.193021		158	0.228425	0.196284	0.202146		158	0.281235	0.208895	0.246814		158	0.188919	0.174371	0.19403
159	0.233269	0.20599	0.191516		159	0.226333	0.198208	0.200039		159	0.282528	0.203943	0.248287		159	0.186988	0.172383	0.19154
160	0.231503	0.201646	0.191293		160	0.224272	0.200444	0.199086		160	0.280305	0.208831	0.252929		160	0.187941	0.170905	0.1903
161	0.228351	0.202003	0.188811		161	0.222671	0.202404	0.198756		161	0.282634	0.211207	0.251435		161	0.18911	0.170221	0.188035
162	0.227865	0.202519	0.187571		162	0.220241	0.203838	0.195299		162	0.282795	0.213928	0.253998		162	0.188285	0.169781	0.184972
163	0.226337	0.197677	0.188527		163	0.217674	0.206093	0.193421		163	0.283141	0.214587	0.249159		163	0.18928	0.167653	0.184473
164	0.221595	0.196118	0.193638		164	0.214598	0.205971	0.191429		164	0.279509	0.217201	0.247953		164	0.188356	0.16628	0.183085
165	0.220648	0.195531	0.194078		165	0.211838	0.205338	0.188477		165	0.27779	0.213627	0.244557		165	0.186273	0.164816	0.180967
166	0.219998	0.192889	0.194398		166	0.207892	0.204426	0.185438		166	0.276444	0.213067	0.245802		166	0.18453	0.164607	0.181648
167	0.219077	0.190548	0.200686		167	0.205868	0.204842	0.1857		167	0.278118	0.213135	0.243771		167	0.186088	0.163943	0.180847
168	0.216083	0.192293	0.203097		168	0.206372	0.20205	0.186858		168	0.273064	0.214492	0.245903		168	0.183819	0.163267	0.179867
169	0.214492	0.192521	0.203471		169	0.204733	0.203145	0.187149		169	0.272824	0.214415	0.246274		169	0.185918	0.164067	0.180012
170	0.211713	0.19359	0.206646		170	0.205012	0.201973	0.188113		170	0.283129	0.216347	0.247886		170	0.185621	0.16348	0.180266
171	0.209999	0.193597	0.21274		171	0.20568	0.200812	0.187699		171	0.283116	0.214368	0.246467		171	0.184967	0.16297	0.179344
172	0.207214	0.194553	0.213818		172	0.20417	0.198807	0.188443		172	0.278742	0.214983	0.244757		172	0.183517	0.163654	0.178144
173	0.206078	0.192903	0.215457		173	0.204063	0.199095	0.185815		173	0.27894	0.215138	0.246658		173	0.182945	0.164406	0.176569
174	0.205519	0.191107	0.217761		174	0.206578	0.197568	0.186524		174	0.281402	0.214963	0.250363		174	0.181593	0.163287	0.176409
175	0.206928	0.190578	0.219878		175	0.205325	0.197448	0.187533		175	0.276457	0.212135	0.24617		175	0.181973	0.16341	0.175033
176	0.208092	0.188892	0.21862		176	0.204147	0.19698	0.188971		176	0.278559	0.210547	0.247551		176	0.183367	0.163504	0.173206
177	0.208702	0.184216	0.219741		177	0.20565	0.197284	0.188151		177	0.283705	0.207557	0.251825		177	0.184509	0.161691	0.173151
178	0.210924	0.185833	0.221182		178	0.205473	0.195916	0.190596		178	0.285297	0.208475	0.251838		178	0.187554	0.160296	0.17366
179	0.211364	0.184667	0.222136		179	0.205057	0.194861	0.190582		179	0.285371	0.209597	0.250086		179	0.18662	0.161326	0.171629
180	0.21272	0.182566	0.223528		180	0.207333	0.194753	0.190499		180	0.28893	0.210982	0.248169		180	0.186555	0.164731	0.17109
181	0.217742	0.183058	0.223734		181	0.209881	0.194486	0.189913		181	0.291542	0.214676	0.248748		181	0.186689	0.168718	0.171947
182	0.222068	0.186156	0.220032		182	0.211465	0.193427	0.190648		182	0.287235	0.217129	0.247337		182	0.184442	0.172577	0.171689
183	0.22329	0.187991	0.217227		183	0.212521	0.193732	0.188521		183	0.294141	0.215733	0.243376		183	0.181565	0.17935	0.171525
184	0.228134	0.187842	0.21467		184	0.213922	0.193932	0.188588		184	0.298202	0.216288	0.245481		184	0.180357	0.18434	0.171816
185	0.232363	0.189644	0.21032		185	0.216518	0.193787	0.188422		185	0.295506	0.218155	0.245081		185	0.181714	0.186958	0.17366
186	0.232722	0.188606	0.209191		186	0.220296	0.19591	0.189143		186	0.296371	0.219093	0.245113		186	0.180907	0.1886	0.175049
187	0.234034	0.18744	0.207867		187	0.223066	0.196526	0.189491		187	0.304642	0.221229	0.23958		187	0.180883	0.190421	0.176852
188	0.233683	0.185154	0.205936		188	0.226177	0.196647	0.191872		188	0.303854	0.2244	0.244177		188	0.181213	0.192083	0.179483
189	0.233922	0.187592	0.204555		189	0.22966	0.197421	0.192228		189	0.302349	0.226444	0.241291		189	0.184163	0.194319	0.181648
190	0.231775	0.187196	0.202292		190	0.23027	0.19658	0.191829		190	0.306584	0.227709	0.245002		190	0.185249	0.195561	0.183671
191	0.229785	0.187055	0.202127		191	0.230886	0.195753	0.191448		191	0.304377	0.228884	0.241415		191	0.183541	0.195904	0.185545
192	0.231257	0.189194	0.200957		192	0.231956	0.196628	0.190479		192	0.298234	0.230607	0.246089		192	0.186683	0.19845	0.187763
193	0.23328	0.188945	0.203246		193	0.232647	0.19533	0.188893		193	0.297503	0.231355	0.245531		193	0.188597	0.19958	0.189474
194	0.234679	0.187884	0.20395		194	0.232774	0.195525	0.186398		194	0.300044	0.230157	0.244367		194	0.187789	0.201586	0.192246
195	0.235836	0.186798	0.204576		195	0.233549	0.198087	0.185589		195	0.295187	0.231523	0.245767		195	0.187039	0.202198	0.194393
196	0.237471	0.187197	0.203843		196	0.233809	0.198037	0.183443		196	0.292897	0.23046	0.248587		196	0.192894	0.204593	0.196938
197	0.23814	0.188725	0.206578		197	0.236451	0.197846	0.183196		197	0.295932	0.229209	0.246056		197	0.193375	0.205529	0.197757
198	0.241408	0.18684	0.204243		198	0.238362	0.200722	0.183083		198	0.291407	0.225793	0.247435		198	0.194504	0.205569	0.199041
199	0.239726	0.18595	0.204159		199	0.239847	0.200755	0.182831		199	0.289727	0.227448	0.250826		199	0.197658	0.204456	0.199459
200	0.238003	0.187287	0.204352		200	0.241508	0.198724	0.182456		200	0.291452	0.225133	0.245169		200	0.198096	0.204892	0.198797
201	0.237107	0.188097	0.200992		201	0.241085	0.199332	0.18151		201	0.293303	0.22852	0.244379		201	0.196315	0.206706	0.198632
202	0.235564	0.184079	0.199704		202	0.238067	0.200307	0.180121		202	0.292146	0.228133	0.244662		202	0.193756	0.208572	0.200489
203	0.231806	0.185381	0.199042		203	0.23729	0.197124	0.177385		203	0.288401	0.234023	0.241996		203	0.193647	0.209288	0.200368
204	0.230977	0.185328	0.198693		204	0.239143	0.197062	0.177129		204	0.285918	0.236991	0.239795		204	0.192183	0.210391	0.199914
205	0.232142	0.187011	0.197267		205	0.240741	0.198331	0.175774		205	0.279603	0.245037	0.242125		205	0.189257	0.212413	0.202115
206	0.228791	0.186067	0.200285		206	0.242818	0.198741	0.177104		206	0.27505	0.247158	0.24389		206	0.186346	0.209713	0.204662
207	0.22772	0.18584	0.199882		207	0.245505	0.197173	0.179498		207	0.268305	0.254057	0.244916		207	0.190092	0.206656	0.206065
208	0.228178	0.186831	0.197491		208	0.246855	0.199204	0.182678		208	0.270497	0.256696	0.243915		208	0.187436	0.205559	0.207158
209	0.228907	0.18724	0.1973		209	0.244049	0.199571	0.181858		209	0.267479	0.257669	0.245283		209	0.183929	0.204962	0.210775
210	0.225297	0.185065	0.199051		210	0.24422	0.198702	0.181334		210	0.27149	0.258606	0.244836		210	0.186025	0.203103	0.211739
211	0.226186	0.184699	0.199644		211	0.245406	0.197251	0.180495		211	0.267293	0.260494	0.241945		211	0.187544	0.201992	0.212532
212	0.224831	0.188117	0.198336		212	0.244149	0.198332	0.177717		212	0.267199	0.260319	0.243449		212	0.185448	0.201931	0.215348
213	0.223262	0.188886	0.202343		213	0.24465	0.199069	0.174897		213	0.262538	0.262963	0.243151		213	0.186712	0.200261	0.218483
214	0.222153	0.189058	0.202717		214	0.247682	0.198701	0.174446		214	0.258852	0.266412	0.244686		214	0.188408	0.197518	0.219011
215	0.223361	0.188815	0.20328		215	0.246946	0.200477	0.174878		215	0.255864	0.266746	0.246649		215	0.187918	0.196199	0.222013
216	0.222734	0.1901	0.202627		216	0.246754	0.201757	0.173919		216	0.256897	0.269547	0.254789		216	0.185986	0.197511	0.222164
217	0.222841	0.187921	0.202764		217	0.246939	0.202887	0.172856		217	0.257058	0.271936	0.255993		217	0.183253	0.196264	0.221636
218	0.223021	0.184817	0.202851		218	0.24579	0.202902	0.17238		218	0.259723	0.276826	0.262586		218	0.181149	0.196294	0.223056
219	0.221373	0.18221	0.200221		219	0.245486	0.203289	0.172451		219	0.261112	0.280382	0.257986		219	0.183655	0.19635	0.225115
220	0.22227	0.17987	0.199804		220	0.246074	0.203965	0.171889		220	0.26368	0.28558	0.259949		220	0.181358	0.196679	0.225771
221	0.222547	0.178145	0.196898		221	0.249403	0.204976	0.171144		221	0.268096	0.287066	0.253723		221	0.183269	0.195236	0.227924
222	0.223588	0.178296	0.197961		222	0.252898	0.205792	0.172297		222	0.271895	0.291966	0.256042		222	0.182744	0.194378	0.2276
223	0.222182	0.181078	0.196902		223	0.254532	0.207939	0.174632		223	0.271214	0.288744	0.253672		223	0.182201	0.193939	0.227562
224	0.22204	0.182993	0.197842		224	0.251695	0.210225	0.177061		224	0.271904	0.292761	0.257124		224	0.178631	0.193	0.226138
225	0.222683	0.184286	0.197641		225	0.253829	0.211546	0.177104		225	0.269083	0.294728	0.254601		225	0.18065	0.191415	0.225388
226	0.222583	0.185779	0.198595		226	0.248708	0.213469	0.179304		226	0.263393	0.297704	0.257201		226	0.178783	0.191424	0.225191
227	0.222269	0.185731	0.198839		227	0.243561	0.212609	0.17899		227	0.264537	0.301432	0.249742		227	0.180842	0.191545	0.226427
228	0.224901	0.183674	0.198028		228	0.243493	0.210862	0.177447		228	0.270936	0.303624	0.242809		228	0.182998	0.190008	0.226529
229	0.225644	0.185056	0.197282		229	0.240261	0.211814	0.175044		229	0.269334	0.303272	0.239453		229	0.184325	0.188929	0.227416
230	0.225057	0.186856	0.196474		230	0.236587	0.210876	0.17563		230	0.273865	0.301405	0.237151		230	0.183176	0.187426	0.227163
231	0.226067	0.184835	0.193968		231	0.236995	0.20893	0.175083		231	0.282305	0.302053	0.233111		231	0.18365	0.184892	0.226142
232	0.225602	0.180518	0.190136		232	0.238177	0.2085	0.174961		232	0.283163	0.29952	0.232901		232	0.182574	0.182812	0.224639
233	0.22641	0.180351	0.189165		233	0.235019	0.209512	0.172341		233	0.282056	0.297977	0.234086		233	0.18272	0.182926	0.223148
234	0.228842	0.180397	0.187966		234	0.236445	0.20895	0.172316		234	0.289369	0.294765	0.233927		234	0.182718	0.182579	0.222396
235	0.227465	0.178782	0.186163		235	0.234023	0.208441	0.171936		235	0.285146	0.296051	0.237962		235	0.182553	0.181413	0.221722
236	0.225345	0.178189	0.189733		236	0.232348	0.208467	0.170521		236	0.279898	0.296074	0.240535		236	0.182628	0.181056	0.221818
237	0.223395	0.182125	0.190677		237	0.232611	0.209979	0.168261		237	0.275906	0.296021	0.246013		237	0.182711	0.180323	0.221507
238	0.220635	0.184246	0.192197		238	0.234122	0.210456	0.170721		238	0.274121	0.299617	0.247394		238	0.180504	0.178734	0.221607
239	0.21622	0.182418	0.193339		239	0.234716	0.210489	0.171131		239	0.266546	0.297505	0.249582		239	0.178905	0.177733	0.221066
240	0.213476	0.18332	0.19553		240	0.236096	0.215291	0.172372		240	0.268472	0.295204	0.248869		240	0.179667	0.17776	0.221161
241	0.212813	0.182848	0.19398		241	0.237603	0.219033	0.172546		241	0.265711	0.290061	0.251626		241	0.178235	0.17783	0.220578
242	0.21144	0.180766	0.194687		242	0.237329	0.222022	0.174703		242	0.262185	0.282335	0.251677		242	0.177737	0.17678	0.220746
243	0.209342	0.178333	0.194958		243	0.235224	0.224331	0.175608		243	0.257007	0.280655	0.255163		243	0.180505	0.176303	0.220238
244	0.205912	0.177099	0.194702		244	0.237834	0.227673	0.177268		244	0.256288	0.284035	0.253311		244	0.180244	0.176254	0.221046
245	0.204901	0.174652	0.1931		245	0.237155	0.225502	0.179358		245	0.249543	0.283025	0.25588		245	0.178728	0.175078	0.221557
246	0.203081	0.176886	0.194103		246	0.238083	0.224305	0.183329		246	0.25041	0.282872	0.256122		246	0.17894	0.174076	0.22018
247	0.201493	0.176218	0.19524		247	0.24178	0.221029	0.188221		247	0.253294	0.286876	0.259558		247	0.179049	0.174276	0.22072
248	0.19838	0.174431	0.195364		248	0.24742	0.220137	0.19206		248	0.252012	0.282355	0.256685		248	0.18239	0.174185	0.221329
249	0.19924	0.174964	0.194682		249	0.250121	0.216225	0.196346		249	0.255552	0.274317	0.256516		249	0.18243	0.173566	0.220793
250	0.199074	0.174889	0.194191		250	0.25604	0.214328	0.199047		250	0.263327	0.270315	0.255471		250	0.184472	0.172353	0.219875
251	0.199336	0.173793	0.191689		251	0.259438	0.212226	0.20269		251	0.264932	0.269372	0.253594		251	0.188764	0.17015	0.221207
252	0.199252	0.174894	0.191848		252	0.262493	0.210949	0.205945		252	0.269369	0.264809	0.249979		252	0.193515	0.17035	0.220935
253	0.201112	0.174169	0.192052		253	0.263929	0.207819	0.209165		253	0.27131	0.26722	0.248734		253	0.192411	0.169129	0.22055
254	0.20085	0.172123	0.19286		254	0.269249	0.206163	0.211445		254	0.274254	0.270415	0.251427		254	0.197172	0.170522	0.222187
255	0.2001	0.172702	0.196238		255	0.272048	0.204655	0.214526		255	0.272548	0.270925	0.251151		255	0.199942	0.172171	0.222148
256	0.199908	0.172686	0.197989		256	0.277717	0.203254	0.214402		256	0.275345	0.269428	0.248935		256	0.202442	0.173106	0.222037
257	0.198645	0.172333	0.19975		257	0.280915	0.201916	0.214387		257	0.271925	0.268507	0.2488		257	0.202721	0.172827	0.221257
258	0.199101	0.174194	0.198135		258	0.281212	0.201724	0.215176		258	0.275871	0.263258	0.250102		258	0.203625	0.173776	0.221277
259	0.199514	0.176508	0.199581		259	0.281938	0.202225	0.213192		259	0.275689	0.260908	0.252381		259	0.204938	0.171111	0.21885
260	0.199447	0.174841	0.198784		260	0.283558	0.200251	0.210427		260	0.278394	0.258279	0.249021		260	0.202847	0.169698	0.218284
261	0.196704	0.176387	0.201417		261	0.278076	0.199404	0.209524		261	0.27867	0.253623	0.247679		261	0.201518	0.170112	0.2169
262	0.196499	0.174866	0.20304		262	0.275623	0.198143	0.206527		262	0.282183	0.250135	0.242731		262	0.201948	0.169954	0.217221
263	0.192783	0.17518	0.20581		263	0.280267	0.196524	0.202486		263	0.285973	0.246294	0.24098		263	0.203089	0.169555	0.215976
264	0.190527	0.174398	0.209359		264	0.277823	0.194834	0.200551		264	0.28607	0.24085	0.232339		264	0.201602	0.171232	0.216334
265	0.189496	0.175422	0.210825		265	0.273977	0.194099	0.198696		265	0.285091	0.237286	0.235217		265	0.205058	0.17215	0.216432
266	0.189143	0.174111	0.212049		266	0.27785	0.193029	0.196695		266	0.287249	0.237282	0.236758		266	0.205259	0.172414	0.215974
267	0.187543	0.178977	0.213008		267	0.276702	0.1929	0.198701		267	0.291232	0.235547	0.23387		267	0.205396	0.174654	0.214382
268	0.188478	0.177864	0.214765		268	0.273882	0.192776	0.199585		268	0.29072	0.232338	0.233081		268	0.202673	0.176406	0.214867
269	0.187774	0.178738	0.211557		269	0.271603	0.190241	0.200729		269	0.29109	0.233358	0.236005		269	0.203555	0.176623	0.214331
270	0.185714	0.178497	0.210421		270	0.27257	0.190846	0.200943		270	0.294876	0.229068	0.231126		270	0.204435	0.178103	0.214348
271	0.184801	0.177927	0.209499		271	0.266811	0.189815	0.203245		271	0.299341	0.225182	0.225665		271	0.20435	0.177593	0.214461
272	0.184522	0.17395	0.208619		272	0.265327	0.188654	0.202255		272	0.302551	0.223627	0.227206		272	0.207409	0.176252	0.215143
273	0.182205	0.174538	0.209163		273	0.262244	0.18856	0.201583		273	0.307441	0.224017	0.223355		273	0.209106	0.174509	0.213883
274	0.180497	0.171239	0.210167		274	0.262957	0.18947	0.200214		274	0.315346	0.220795	0.225178		274	0.208927	0.173706	0.213363
275	0.181078	0.171211	0.21207		275	0.261105	0.189292	0.200331		275	0.323785	0.218574	0.226788		275	0.207089	0.172076	0.21375
276	0.181515	0.171089	0.213023		276	0.262121	0.190797	0.198199		276	0.329355	0.217043	0.227084		276	0.207147	0.172012	0.215309
277	0.180859	0.170868	0.212114		277	0.258323	0.193804	0.197282		277	0.335902	0.2169	0.227884		277	0.20392	0.172319	0.216825
278	0.179967	0.173101	0.212453		278	0.256813	0.195618	0.197078		278	0.339582	0.215269	0.232444		278	0.20157	0.172699	0.218281
279	0.179879	0.176239	0.212258		279	0.253439	0.199443	0.198705		279	0.341045	0.21301	0.231078		279	0.200007	0.173	0.218775
280	0.179867	0.175488	0.211065		280	0.251541	0.2018	0.196544		280	0.342245	0.213127	0.233262		280	0.199798	0.173101	0.216858
281	0.179756	0.175859	0.210533		281	0.24948	0.203843	0.196096		281	0.340063	0.21073	0.235552		281	0.198808	0.174837	0.21604
282	0.18004	0.179814	0.209795		282	0.251728	0.206983	0.194813		282	0.340035	0.208686	0.23621		282	0.196711	0.174651	0.212394
283	0.180811	0.177786	0.205927		283	0.25139	0.210254	0.195498		283	0.338328	0.204528	0.236291		283	0.198067	0.176331	0.210707
284	0.181075	0.178293	0.208968		284	0.250454	0.210081	0.193799		284	0.346932	0.202966	0.237696		284	0.198942	0.177582	0.210345
285	0.18109	0.181089	0.209579		285	0.250683	0.213088	0.195344		285	0.34926	0.205552	0.237693		285	0.198054	0.178432	0.2103
286	0.178991	0.182124	0.209461		286	0.250603	0.213684	0.196192		286	0.349677	0.208627	0.235558		286	0.195461	0.177676	0.210268
287	0.177849	0.181265	0.206632		287	0.249245	0.213596	0.197215		287	0.350454	0.207478	0.234149		287	0.196089	0.17681	0.209881
288	0.177986	0.182439	0.206788		288	0.247969	0.213003	0.196527		288	0.358273	0.20979	0.23287		288	0.196337	0.175374	0.211172
289	0.177278	0.180987	0.205693		289	0.247956	0.215942	0.19816		289	0.35197	0.210277	0.230307		289	0.194703	0.17467	0.211039
290	0.174066	0.179991	0.204179		290	0.246071	0.217083	0.198725		290	0.344041	0.205769	0.226307		290	0.196995	0.176139	0.210944
291	0.176109	0.180251	0.202097		291	0.245509	0.219267	0.198145		291	0.342674	0.204098	0.229256		291	0.198804	0.175818	0.211131
292	0.177357	0.181214	0.204864		292	0.243222	0.218573	0.197969		292	0.343336	0.206345	0.22698		292	0.200315	0.176594	0.21125
293	0.176101	0.180516	0.205064		293	0.240821	0.218328	0.196483		293	0.336252	0.206956	0.225736		293	0.196236	0.176108	0.210769
294	0.176254	0.18156	0.202773		294	0.237157	0.219122	0.196358		294	0.33371	0.207718	0.223838		294	0.198752	0.176047	0.209432
295	0.178489	0.180853	0.200038		295	0.235	0.220145	0.1957		295	0.338134	0.209717	0.225697		295	0.195761	0.176409	0.209242
296	0.178309	0.180571	0.199298		296	0.231752	0.221276	0.195078		296	0.336233	0.210992	0.221747		296	0.196007	0.178067	0.20701
297	0.177611	0.176919	0.194855		297	0.228907	0.22454	0.191945		297	0.328652	0.21054	0.221568		297	0.192361	0.178249	0.208871
298	0.178149	0.177881	0.192661		298	0.228953	0.227816	0.192294		298	0.320495	0.208782	0.221593		298	0.193279	0.180453	0.208118
299	0.180716	0.175437	0.190188		299	0.230062	0.228991	0.191755		299	0.316974	0.207586	0.221066		299	0.193007	0.180259	0.207086
300	0.182514	0.174536	0.189947		300	0.229654	0.229789	0.193599		300	0.309086	0.208525	0.216669		300	0.193293	0.178918	0.206337
301	0.18193	0.172945	0.19016		301	0.227338	0.232688	0.195404		301	0.308461	0.206561	0.217055		301	0.194086	0.178525	0.205872
302	0.181912	0.174699	0.190621		302	0.227414	0.234119	0.197481		302	0.304028	0.204483	0.218783		302	0.19588	0.180273	0.204775
303	0.18237	0.172876	0.191471		303	0.22677	0.235593	0.197594		303	0.303013	0.20524	0.216924		303	0.196362	0.179469	0.202558
304	0.180531	0.175864	0.190936		304	0.225688	0.236945	0.19804		304	0.301402	0.205069	0.21569		304	0.193162	0.179191	0.201795
305	0.178099	0.176702	0.189851		305	0.226317	0.238953	0.195979		305	0.304458	0.203871	0.220265		305	0.194019	0.178647	0.200548
306	0.1789	0.177525	0.189272		306	0.228862	0.239454	0.196468		306	0.298212	0.205198	0.222231		306	0.193802	0.17798	0.201075
307	0.179534	0.177641	0.188933		307	0.229886	0.23941	0.199975		307	0.29795	0.203493	0.221887		307	0.194522	0.175288	0.200931
308	0.180517	0.178212	0.189693		308	0.229895	0.242125	0.201788		308	0.302717	0.205013	0.222626		308	0.196648	0.174453	0.203703
309	0.181778	0.176836	0.18679		309	0.23084	0.242287	0.203892		309	0.298862	0.206579	0.22524		309	0.197908	0.1747	0.205136
310	0.183337	0.178593	0.187774		310	0.231725	0.241078	0.208116		310	0.293456	0.206069	0.223112		310	0.199312	0.174006	0.209086
311	0.183225	0.174884	0.187627		311	0.232391	0.240659	0.209227		311	0.294674	0.202935	0.222492		311	0.199213	0.173459	0.20994
312	0.183383	0.172166	0.188923		312	0.232374	0.242064	0.210277		312	0.293363	0.203546	0.219964		312	0.19989	0.174621	0.210874
313	0.183614	0.173255	0.187861		313	0.231687	0.239033	0.214673		313	0.285035	0.199539	0.220627		313	0.200131	0.173435	0.211315
314	0.184842	0.172848	0.191562		314	0.231801	0.238457	0.214941		314	0.283398	0.195259	0.216716		314	0.197766	0.173707	0.213025
315	0.185081	0.172882	0.193363		315	0.229673	0.237591	0.218118		315	0.281228	0.192772	0.213886		315	0.196868	0.176484	0.211275
316	0.185174	0.177494	0.194336		316	0.232096	0.235926	0.220739		316	0.278314	0.1915	0.211848		316	0.19728	0.177646	0.211781
317	0.185414	0.179729	0.195893		317	0.235968	0.233134	0.222147		317	0.275207	0.189399	0.211492		317	0.198066	0.17879	0.212892
318	0.184988	0.179126	0.195788		318	0.23948	0.232722	0.221098		318	0.278621	0.188419	0.210155		318	0.199724	0.180824	0.213523
319	0.18469	0.180624	0.195726		319	0.241774	0.23262	0.22244		319	0.27859	0.190498	0.214283		319	0.200119	0.180529	0.214226
320	0.184991	0.177828	0.196242		320	0.246865	0.231878	0.220867		320	0.275817	0.190298	0.21306		320	0.200932	0.179271	0.213982
321	0.185453	0.174854	0.194815		321	0.247257	0.230389	0.220584		321	0.276129	0.191217	0.210422		321	0.200417	0.180223	0.212929
322	0.184628	0.175052	0.193131		322	0.245662	0.22999	0.219909		322	0.276981	0.19163	0.208991		322	0.202164	0.179959	0.210861
323	0.183492	0.173505	0.191647		323	0.243204	0.228367	0.218165		323	0.273104	0.192237	0.20985		323	0.199262	0.179224	0.209869
324	0.181818	0.170911	0.192237		324	0.242884	0.22703	0.217766		324	0.274015	0.189828	0.208113		324	0.205427	0.179409	0.210228
325	0.18074	0.173143	0.191132		325	0.240501	0.225721	0.216838		325	0.278628	0.191378	0.209295		325	0.204397	0.178246	0.21073
326	0.182422	0.174869	0.19454		326	0.23995	0.225654	0.217013		326	0.273729	0.190421	0.213996		326	0.203379	0.175304	0.210386
327	0.183575	0.170567	0.196641		327	0.241072	0.22456	0.214941		327	0.267967	0.191578	0.214337		327	0.198303	0.174531	0.210825
328	0.187835	0.171621	0.199591		328	0.244876	0.224493	0.219141		328	0.269555	0.18942	0.210723		328	0.197743	0.174968	0.210643
329	0.19255	0.172777	0.199717		329	0.24064	0.222634	0.218438		329	0.265808	0.190772	0.208637		329	0.195456	0.172985	0.208664
330	0.195771	0.171894	0.200908		330	0.236313	0.224041	0.216536		330	0.258406	0.1909	0.212819		330	0.193557	0.172618	0.208027
331	0.198546	0.171847	0.199545		331	0.23531	0.225453	0.214224		331	0.25772	0.191862	0.21314		331	0.192127	0.173867	0.20922
332	0.201151	0.174813	0.200219		332	0.231339	0.226116	0.215733		332	0.257986	0.190594	0.214724		332	0.19169	0.174931	0.210686
333	0.20069	0.175144	0.200332		333	0.22681	0.225906	0.210414		333	0.257174	0.193761	0.21975		333	0.191573	0.175537	0.20896
334	0.199827	0.176369	0.202323		334	0.227679	0.227965	0.209247		334	0.255338	0.193822	0.22283		334	0.187877	0.178185	0.209186
335	0.198926	0.176073	0.203382		335	0.228174	0.22737	0.20826		335	0.25588	0.191259	0.221014		335	0.1877	0.181105	0.210161
336	0.196634	0.176422	0.20462		336	0.226237	0.22653	0.209726		336	0.261482	0.191129	0.21754		336	0.189042	0.182384	0.209835
337	0.19426	0.177877	0.204406		337	0.22614	0.225292	0.207203		337	0.263219	0.191686	0.216982		337	0.191642	0.183896	0.208465
338	0.192859	0.177793	0.204037		338	0.221809	0.222635	0.209367		338	0.259849	0.191913	0.20927		338	0.19048	0.18667	0.209549
339	0.190069	0.177148	0.204687		339	0.219966	0.221735	0.20969		339	0.263923	0.193019	0.207058		339	0.194457	0.190778	0.209511
340	0.189424	0.177242	0.205207		340	0.218476	0.219375	0.211617		340	0.266216	0.193886	0.205794		340	0.196426	0.193371	0.208172
341	0.187972	0.177588	0.205948		341	0.215166	0.216032	0.209904		341	0.263902	0.194501	0.211612		341	0.196628	0.197263	0.207875
342	0.185143	0.176916	0.2078		342	0.213828	0.215415	0.212111		342	0.265638	0.197145	0.216337		342	0.195239	0.199548	0.207205
343	0.184847	0.177166	0.20918		343	0.215467	0.215878	0.211055		343	0.265581	0.198454	0.225972		343	0.196539	0.201838	0.208971
344	0.18591	0.177324	0.203908		344	0.214968	0.213754	0.210699		344	0.261048	0.200839	0.231316		344	0.193096	0.204147	0.207948
345	0.185435	0.178909	0.202194		345	0.214727	0.212782	0.208776		345	0.260021	0.205395	0.233431		345	0.192004	0.206326	0.207701
346	0.185048	0.17729	0.200711		346	0.214583	0.2141	0.210706		346	0.259317	0.207399	0.234832		346	0.190146	0.208222	0.206405
347	0.188158	0.177298	0.197352		347	0.213619	0.213631	0.210045		347	0.25662	0.208544	0.237339		347	0.190654	0.211384	0.206027
348	0.188756	0.177695	0.197073		348	0.213566	0.213436	0.209505		348	0.259448	0.211173	0.240796		348	0.192785	0.20842	0.202364
349	0.187994	0.176995	0.199625		349	0.21334	0.212184	0.208812		349	0.261105	0.212184	0.241757		349	0.196413	0.2069	0.200086
350	0.190071	0.176465	0.199589		350	0.21356	0.211587	0.210103		350	0.259678	0.212327	0.247564		350	0.196401	0.204577	0.198948
351	0.192497	0.178901	0.199537		351	0.213519	0.210711	0.207331		351	0.257764	0.212642	0.247024		351	0.196872	0.201195	0.198411
352	0.195574	0.178704	0.199202		352	0.214806	0.209259	0.206382		352	0.259348	0.212807	0.249008		352	0.197014	0.19717	0.196399
353	0.19778	0.180029	0.195421		353	0.214388	0.209713	0.20481		353	0.257306	0.21128	0.247086		353	0.193883	0.198415	0.194885
354	0.200549	0.181815	0.195611		354	0.214005	0.210511	0.203099		354	0.257416	0.21058	0.250564		354	0.191877	0.196081	0.195956
355	0.202149	0.179896	0.19634		355	0.21336	0.21046	0.201213		355	0.258732	0.207684	0.249142		355	0.18947	0.193889	0.195553
356	0.20293	0.181534	0.19404		356	0.213222	0.210669	0.200739		356	0.266081	0.207889	0.249607		356	0.189528	0.194245	0.195172
357	0.204594	0.183853	0.193642		357	0.213649	0.210689	0.200219		357	0.263456	0.205752	0.250217		357	0.186194	0.192348	0.195698
358	0.204409	0.183367	0.194797		358	0.214084	0.210466	0.200634		358	0.267872	0.206929	0.253675		358	0.186716	0.189718	0.197394
359	0.205194	0.183887	0.192851		359	0.215325	0.209703	0.203159		359	0.273758	0.208735	0.255613		359	0.186529	0.191373	0.198411
360	0.20573	0.188503	0.192359		360	0.214365	0.209962	0.202103		360	0.281997	0.210468	0.261856		360	0.187941	0.19123	0.199229
361	0.208371	0.185556	0.193861		361	0.212568	0.208359	0.202161		361	0.278803	0.211269	0.265477		361	0.187667	0.189374	0.200169
362	0.208716	0.183029	0.192917		362	0.209251	0.209648	0.199749		362	0.286858	0.213341	0.267456		362	0.188075	0.188812	0.199817
363	0.209517	0.182716	0.190807		363	0.20842	0.209663	0.199723		363	0.289786	0.212147	0.267493		363	0.188403	0.189974	0.200416
364	0.210596	0.180228	0.192939		364	0.206627	0.211238	0.198384		364	0.286931	0.211106	0.267877		364	0.187256	0.18702	0.199736
365	0.211725	0.178374	0.189639		365	0.206149	0.212289	0.199563		365	0.277432	0.211237	0.266905		365	0.188227	0.186391	0.19844
366	0.211632	0.180257	0.188135		366	0.203924	0.215869	0.199849		366	0.286443	0.210525	0.269165		366	0.189067	0.185173	0.199748
367	0.212625	0.181575	0.18691		367	0.202288	0.217675	0.198643		367	0.290271	0.209622	0.264781		367	0.190806	0.182813	0.201898
368	0.216925	0.180573	0.188426		368	0.199388	0.220488	0.197508		368	0.290404	0.211887	0.268295		368	0.189308	0.182116	0.20207
369	0.218328	0.180279	0.185734		369	0.197226	0.221464	0.194631		369	0.296931	0.21438	0.269422		369	0.18789	0.180885	0.202333
370	0.220107	0.180702	0.186676		370	0.195178	0.223165	0.194971		370	0.310165	0.217484	0.269791		370	0.188024	0.181111	0.205028
371	0.220837	0.179322	0.185145		371	0.19614	0.224212	0.193228		371	0.308325	0.217837	0.26302		371	0.188176	0.180176	0.205504
372	0.221269	0.179097	0.18529		372	0.19702	0.224671	0.194125		372	0.309338	0.221413	0.264024		372	0.185859	0.181393	0.204617
373	0.219594	0.178602	0.182753		373	0.195305	0.224469	0.193688		373	0.31052	0.224123	0.25961		373	0.18822	0.180759	0.204196
374	0.219603	0.181189	0.182744		374	0.194053	0.225069	0.196171		374	0.312815	0.221892	0.252303		374	0.189415	0.182065	0.204104
375	0.220829	0.180406	0.184692		375	0.194474	0.225009	0.19735		375	0.306643	0.221405	0.245185		375	0.188161	0.178993	0.203861
376	0.222105	0.179803	0.18605		376	0.195162	0.223589	0.202258		376	0.307332	0.224338	0.243189		376	0.187543	0.179536	0.203346
377	0.22621	0.179333	0.187371		377	0.193846	0.223621	0.20807		377	0.302493	0.221587	0.238365		377	0.187034	0.182128	0.204479
378	0.228049	0.179321	0.18881		378	0.195433	0.223702	0.211773		378	0.305254	0.217848	0.23569		378	0.183916	0.186248	0.205047
379	0.229869	0.177272	0.186689		379	0.197048	0.22445	0.213551		379	0.308617	0.218929	0.233993		379	0.181453	0.187503	0.205758
380	0.229791	0.178574	0.184827		380	0.194964	0.226921	0.215446		380	0.316591	0.221308	0.237088		380	0.17999	0.19469	0.206715
381	0.22898	0.179304	0.18352		381	0.19265	0.228633	0.217706		381	0.320498	0.219467	0.235924		381	0.178977	0.201562	0.205923
382	0.227	0.181444	0.184984		382	0.192981	0.230818	0.219497		382	0.324451	0.222471	0.238442		382	0.17841	0.205263	0.207106
383	0.22653	0.184441	0.187433		383	0.19261	0.233732	0.225228		383	0.326499	0.225564	0.238486		383	0.176797	0.207631	0.207283
384	0.226671	0.185863	0.190404		384	0.190519	0.236573	0.227916		384	0.320882	0.231505	0.239286		384	0.180281	0.213552	0.208218
385	0.226814	0.184242	0.191833		385	0.190859	0.239222	0.232631		385	0.316864	0.231029	0.237491		385	0.17978	0.217204	0.208292
386	0.229082	0.183877	0.195103		386	0.191751	0.243748	0.235785		386	0.315802	0.23405	0.239584		386	0.178601	0.21912	0.208988
387	0.22675	0.183501	0.19393		387	0.19084	0.247224	0.239674		387	0.312358	0.238416	0.238043		387	0.180659	0.221804	0.207916
388	0.226014	0.180846	0.191625		388	0.189259	0.248545	0.239444		388	0.308698	0.238546	0.237737		388	0.180625	0.223079	0.208192
389	0.223952	0.1804	0.191364		389	0.18899	0.249888	0.24478		389	0.313572	0.235343	0.236829		389	0.179144	0.223281	0.208407
390	0.221607	0.179021	0.190617		390	0.188427	0.250663	0.246264		390	0.318075	0.233976	0.237373		390	0.17974	0.224481	0.208693
391	0.216361	0.179099	0.188208		391	0.186042	0.251584	0.245906		391	0.311953	0.235593	0.2401		391	0.180927	0.224125	0.209044
392	0.214973	0.176356	0.187658		392	0.185925	0.252834	0.246491		392	0.311968	0.232793	0.240641		392	0.180805	0.224581	0.208846
393	0.212065	0.175504	0.187682		393	0.187465	0.255365	0.246626		393	0.309905	0.23372	0.240763		393	0.181313	0.225549	0.208508
394	0.210026	0.177775	0.187694		394	0.18792	0.257902	0.247151		394	0.301904	0.232763	0.242937		394	0.179393	0.225171	0.20692
395	0.209052	0.177403	0.188795		395	0.188238	0.260247	0.247178		395	0.297094	0.233002	0.241831		395	0.179825	0.223397	0.203044
396	0.208148	0.178734	0.190685		396	0.189455	0.260082	0.247636		396	0.298067	0.232802	0.23923		396	0.178606	0.225544	0.20272
397	0.206685	0.178891	0.190654		397	0.188835	0.259738	0.249978		397	0.300329	0.236244	0.239311		397	0.17714	0.22491	0.202535
398	0.207317	0.180599	0.192471		398	0.188325	0.25979	0.253378		398	0.304332	0.236288	0.239245		398	0.176357	0.226314	0.203368
399	0.206304	0.178694	0.194211		399	0.186284	0.257969	0.252238		399	0.305754	0.236831	0.239512		399	0.176966	0.226285	0.203768
400	0.203754	0.179913	0.195497		400	0.185919	0.255521	0.251387		400	0.302786	0.240661	0.238733		400	0.176159	0.225341	0.205899
401	0.203803	0.178874	0.195796		401	0.184303	0.254417	0.250932		401	0.29859	0.240544	0.239586		401	0.175913	0.22389	0.205258
402	0.20301	0.17823	0.196226		402	0.184037	0.253212	0.245909		402	0.297057	0.238609	0.23904		402	0.175336	0.2217	0.206213
403	0.200092	0.176234	0.196329		403	0.184459	0.250698	0.240765		403	0.292518	0.241232	0.240893		403	0.176483	0.21942	0.205473
404	0.199146	0.175262	0.195566		404	0.186379	0.250308	0.239872		404	0.286922	0.243029	0.240657		404	0.175632	0.216651	0.205802
405	0.198051	0.175044	0.194036		405	0.186779	0.251164	0.236566		405	0.283125	0.240702	0.243448		405	0.173656	0.215611	0.206824
406	0.197154	0.173087	0.19306		406	0.189255	0.25137	0.234977		406	0.286309	0.242289	0.244525		406	0.175718	0.212742	0.207665
407	0.196123	0.173571	0.195172		407	0.190228	0.252455	0.233766		407	0.286131	0.241319	0.247744		407	0.176302	0.211981	0.208559
408	0.196521	0.173007	0.196343		408	0.188559	0.254198	0.232887		408	0.280289	0.241706	0.245944		408	0.175268	0.209313	0.209539
409	0.196995	0.173128	0.196614		409	0.189236	0.255948	0.229215		409	0.279717	0.244372	0.248176		409	0.177156	0.208259	0.210032
410	0.198603	0.171791	0.198537		410	0.188372	0.256185	0.228411		410	0.281013	0.243176	0.246509		410	0.177739	0.209586	0.210105
411	0.198329	0.173917	0.199518		411	0.188643	0.257399	0.222637		411	0.279563	0.241171	0.245514		411	0.17576	0.210186	0.210251
412	0.196806	0.172775	0.197964		412	0.188795	0.256711	0.219171		412	0.270249	0.243125	0.242548		412	0.174748	0.213213	0.209957
413	0.195527	0.17353	0.198938		413	0.190465	0.258429	0.215152		413	0.267987	0.239828	0.240175		413	0.176351	0.214632	0.210095
414	0.19327	0.173061	0.201824		414	0.191811	0.25857	0.212979		414	0.267902	0.236281	0.239784		414	0.174673	0.216704	0.209758
415	0.190576	0.172562	0.199244		415	0.193593	0.257704	0.206983		415	0.269155	0.237789	0.235903		415	0.177081	0.214104	0.209595
416	0.188037	0.169733	0.198934		416	0.194576	0.258194	0.204616		416	0.269924	0.234317	0.235534		416	0.178158	0.213391	0.208474
417	0.189348	0.172966	0.200056		417	0.1946	0.258852	0.200129		417	0.273172	0.229686	0.235306		417	0.180157	0.21057	0.207454
418	0.188377	0.173183	0.197453		418	0.19518	0.258013	0.200818		418	0.277994	0.22779	0.237419		418	0.181273	0.209675	0.207039
419	0.187835	0.172829	0.194041		419	0.194686	0.257716	0.197301		419	0.281163	0.224445	0.234045		419	0.182199	0.210227	0.206972
420	0.188786	0.174727	0.194562		420	0.195249	0.259188	0.197262		420	0.279042	0.224804	0.234923		420	0.1817	0.210844	0.206183
421	0.18964	0.177253	0.191534		421	0.194769	0.256484	0.197635		421	0.27545	0.225061	0.236288		421	0.181685	0.213351	0.206288
422	0.188143	0.1744	0.189035		422	0.195907	0.256919	0.19585		422	0.277844	0.226602	0.23864		422	0.184782	0.213588	0.204587
423	0.188666	0.173846	0.188832		423	0.196385	0.258168	0.19354		423	0.275238	0.224164	0.236597		423	0.184104	0.212843	0.203407
424	0.190377	0.175421	0.189911		424	0.195747	0.259505	0.193891		424	0.269626	0.224481	0.238301		424	0.184732	0.211152	0.200759
425	0.190292	0.17458	0.191399		425	0.195952	0.260465	0.191912		425	0.270973	0.221091	0.238733		425	0.186204	0.211029	0.198984
426	0.191969	0.170701	0.193916		426	0.19606	0.263792	0.18943		426	0.274899	0.2199	0.235687		426	0.187825	0.209965	0.197049
427	0.194274	0.169541	0.194543		427	0.19552	0.265853	0.190321		427	0.273229	0.21759	0.233003		427	0.185679	0.210095	0.196948
428	0.195202	0.170237	0.194377		428	0.194824	0.267183	0.18775		428	0.274839	0.218589	0.23472		428	0.186649	0.210154	0.195395
429	0.197137	0.170785	0.194287		429	0.195888	0.268907	0.185898		429	0.278283	0.217085	0.230517		429	0.18705	0.2106	0.195067
430	0.198217	0.170768	0.191362		430	0.195881	0.271873	0.183804		430	0.276386	0.219134	0.232103		430	0.187782	0.208731	0.193909
431	0.197397	0.172459	0.191394		431	0.197443	0.272463	0.183851		431	0.267365	0.220849	0.234592		431	0.189433	0.205556	0.193369
432	0.198521	0.174978	0.191249		432	0.197661	0.275232	0.18051		432	0.271147	0.219238	0.235959		432	0.190975	0.203437	0.19222
433	0.198691	0.173734	0.190834		433	0.199512	0.274272	0.178654		433	0.271062	0.216498	0.235095		433	0.192788	0.201182	0.190415
434	0.200353	0.171952	0.18925		434	0.199644	0.273534	0.176766		434	0.266456	0.215804	0.23557		434	0.196136	0.198177	0.191275
435	0.201233	0.171236	0.19028		435	0.20031	0.271902	0.178244		435	0.265308	0.209873	0.23426		435	0.19628	0.198403	0.190856
436	0.203655	0.170753	0.188322		436	0.199693	0.271933	0.177469		436	0.265612	0.205551	0.23181		436	0.196233	0.198648	0.188866
437	0.203571	0.168492	0.188905		437	0.201551	0.266538	0.18045		437	0.25761	0.204564	0.230121		437	0.194506	0.197954	0.187563
438	0.20645	0.166123	0.189282		438	0.202413	0.264512	0.182055		438	0.259048	0.204897	0.22778		438	0.193577	0.198754	0.186471
439	0.205908	0.164648	0.189587		439	0.202072	0.262027	0.184894		439	0.264756	0.205228	0.232044		439	0.190516	0.200768	0.183997
440	0.207177	0.166002	0.189935		440	0.203722	0.260764	0.186474		440	0.259745	0.205781	0.23204		440	0.192164	0.201706	0.181688
441	0.207126	0.166779	0.19062		441	0.204748	0.260725	0.188277		441	0.260995	0.208692	0.230758		441	0.19036	0.20126	0.181184
442	0.208007	0.16744	0.189704		442	0.204866	0.262055	0.19151		442	0.26268	0.209265	0.2316		442	0.191628	0.203514	0.17888
443	0.205245	0.170893	0.189615		443	0.204688	0.261622	0.193478		443	0.254843	0.2116	0.234302		443	0.191915	0.204389	0.179625
444	0.205691	0.170061	0.187888		444	0.204447	0.260006	0.194203		444	0.248107	0.211202	0.233655		444	0.195014	0.205121	0.180556
445	0.207304	0.167081	0.187983		445	0.204914	0.256684	0.195842		445	0.253483	0.211899	0.23326		445	0.191336	0.205562	0.18196
446	0.208915	0.168982	0.187754		446	0.206155	0.252569	0.197317		446	0.257344	0.209292	0.238554		446	0.193399	0.207097	0.182892
447	0.207843	0.168311	0.188615		447	0.205454	0.249382	0.194203		447	0.255228	0.211491	0.23615		447	0.193198	0.205695	0.185229
448	0.210575	0.167271	0.189707		448	0.205481	0.247095	0.193028		448	0.260616	0.211198	0.240831		448	0.193889	0.205014	0.185165
449	0.21053	0.16847	0.190069		449	0.208811	0.245996	0.192728		449	0.263387	0.20981	0.240812		449	0.192556	0.205417	0.184951
450	0.208353	0.170961	0.189945		450	0.207359	0.245773	0.191117		450	0.261077	0.210098	0.245455		450	0.195669	0.205276	0.185861
451	0.208	0.169177	0.190009		451	0.206318	0.245007	0.188174		451	0.261428	0.21215	0.245196		451	0.194395	0.2028	0.187882
452	0.209636	0.171354	0.191358		452	0.208645	0.244561	0.186694		452	0.267456	0.212574	0.249534		452	0.19841	0.203037	0.188829
453	0.208862	0.171826	0.191566		453	0.209573	0.245965	0.184462		453	0.273318	0.212595	0.245452		453	0.200217	0.202033	0.190147
454	0.20864	0.174046	0.192248		454	0.207051	0.247569	0.181042		454	0.279286	0.214445	0.245773		454	0.201355	0.200333	0.192279
455	0.210232	0.172532	0.190133		455	0.207518	0.248251	0.180929		455	0.28341	0.216263	0.243292		455	0.201657	0.197306	0.194388
456	0.21017	0.174362	0.189171		456	0.208194	0.249896	0.181538		456	0.281591	0.215871	0.238437		456	0.202344	0.196736	0.195674
457	0.211707	0.173196	0.188884		457	0.206202	0.251771	0.181966		457	0.27628	0.213419	0.23925		457	0.201602	0.193791	0.197827
458	0.210422	0.173073	0.18919		458	0.206639	0.252515	0.182227		458	0.273969	0.214131	0.23952		458	0.203791	0.192799	0.200913
459	0.21142	0.172021	0.191205		459	0.208414	0.252726	0.181955		459	0.270221	0.213276	0.237701		459	0.203322	0.189761	0.202198
460	0.209633	0.172603	0.192776		460	0.211369	0.250752	0.178707		460	0.271488	0.212234	0.237939		460	0.204353	0.187854	0.201337
461	0.209809	0.171374	0.197674		461	0.211777	0.251035	0.176173		461	0.273361	0.211768	0.238779		461	0.207073	0.187564	0.201856
462	0.207379	0.171236	0.198101		462	0.21413	0.250272	0.175596		462	0.274217	0.212071	0.238046		462	0.205606	0.185958	0.202587
463	0.210599	0.17183	0.195707		463	0.215303	0.250702	0.173676		463	0.277918	0.209501	0.233805		463	0.20448	0.183084	0.202597
464	0.209466	0.171108	0.19472		464	0.216756	0.250285	0.170654		464	0.280524	0.211376	0.231943		464	0.205248	0.183169	0.203106
465	0.210272	0.172327	0.194346		465	0.215751	0.251717	0.170255		465	0.283438	0.214582	0.230102		465	0.207528	0.182918	0.203994
466	0.209441	0.169302	0.191479		466	0.217448	0.25143	0.168322		466	0.28643	0.215349	0.227648		466	0.209002	0.180707	0.203322
467	0.209311	0.170969	0.19055		467	0.218947	0.254171	0.167383		467	0.295892	0.217608	0.222421		467	0.211315	0.181482	0.201618
468	0.209708	0.168747	0.190771		468	0.218192	0.254304	0.167998		468	0.290366	0.22028	0.224302		468	0.211882	0.181922	0.200633
469	0.210984	0.169793	0.18915		469	0.219319	0.255257	0.169433		469	0.286526	0.220892	0.228556		469	0.21701	0.180393	0.199816
470	0.210338	0.171604	0.189387		470	0.219015	0.25703	0.170761		470	0.281155	0.220265	0.22872		470	0.216526	0.179794	0.198947
471	0.213386	0.173637	0.18815		471	0.21779	0.257148	0.171071		471	0.278119	0.224096	0.230444		471	0.218236	0.178807	0.199196
472	0.216115	0.172555	0.185933		472	0.218049	0.256237	0.170483		472	0.271631	0.226311	0.229791		472	0.223052	0.176643	0.200171
473	0.216436	0.174641	0.183066		473	0.220131	0.255457	0.168777		473	0.269582	0.229369	0.22779		473	0.225365	0.173812	0.200469
474	0.215192	0.173522	0.184088		474	0.220995	0.255091	0.168047		474	0.266782	0.232547	0.226384		474	0.226593	0.171754	0.199946
475	0.217588	0.168302	0.182739		475	0.22349	0.253757	0.166444		475	0.268109	0.23639	0.225116		475	0.228722	0.170463	0.199963
476	0.216457	0.16993	0.180585		476	0.225677	0.255781	0.167377		476	0.268076	0.239135	0.226026		476	0.228497	0.170354	0.199382
477	0.215477	0.16952	0.18373		477	0.226291	0.254676	0.165896		477	0.266624	0.239845	0.2305		477	0.224671	0.169226	0.198143
478	0.213701	0.168691	0.186264		478	0.227715	0.254946	0.167273		478	0.268129	0.240369	0.234774		478	0.222629	0.169931	0.195676
479	0.213815	0.167144	0.184694		479	0.228331	0.25411	0.166277		479	0.269183	0.239005	0.23309		479	0.220476	0.169372	0.194231
480	0.214418	0.170119	0.185632		480	0.226918	0.254191	0.166793		480	0.262219	0.239415	0.238065		480	0.218827	0.169753	0.192926
481	0.212329	0.168977	0.186254		481	0.227008	0.251805	0.167228		481	0.259646	0.237108	0.240913		481	0.216158	0.167509	0.189308
482	0.209823	0.167191	0.182292		482	0.223596	0.251102	0.170062		482	0.257225	0.238684	0.242887		482	0.215386	0.167554	0.187839
483	0.211024	0.168536	0.181191		483	0.219984	0.248612	0.169097		483	0.252935	0.237859	0.244466		483	0.214439	0.167408	0.187063
484	0.210898	0.172904	0.182124		484	0.219586	0.249313	0.173687		484	0.24955	0.238619	0.248834		484	0.209709	0.165865	0.18519
485	0.208654	0.17124	0.182218		485	0.219549	0.250676	0.17617		485	0.24623	0.237211	0.247493		485	0.208435	0.163412	0.184386
486	0.207582	0.170571	0.184981		486	0.21744	0.252617	0.18017		486	0.244259	0.236678	0.250229		486	0.208593	0.163692	0.185551
487	0.207638	0.173311	0.183239		487	0.219684	0.253452	0.182677		487	0.24747	0.233764	0.255246		487	0.207548	0.161596	0.184599
488	0.204859	0.171114	0.184164		488	0.220166	0.257019	0.186954		488	0.246352	0.234733	0.256967		488	0.205587	0.158925	0.183195
489	0.203015	0.169486	0.184686		489	0.217455	0.260578	0.188187		489	0.247606	0.23519	0.25794		489	0.206962	0.160622	0.181964
490	0.199156	0.169103	0.181129		490	0.216973	0.260911	0.188272		490	0.251844	0.233551	0.263307		490	0.204113	0.160886	0.18088
491	0.199091	0.170403	0.179007		491	0.217071	0.262038	0.185834		491	0.254512	0.233894	0.260788		491	0.200336	0.160827	0.178735
492	0.198586	0.169844	0.182008		492	0.213599	0.262549	0.183555		492	0.247864	0.233781	0.260334		492	0.201302	0.162299	0.179093
493	0.197669	0.17089	0.183729		493	0.211933	0.262261	0.182923		493	0.250054	0.234009	0.260644		493	0.199894	0.165034	0.178433
494	0.197592	0.168889	0.180926		494	0.210163	0.258757	0.179831		494	0.251824	0.233097	0.26465		494	0.200558	0.164187	0.179454
495	0.198056	0.174354	0.183739		495	0.208666	0.257393	0.17867		495	0.255944	0.235053	0.265025		495	0.201078	0.166629	0.178983
496	0.198093	0.17249	0.18493		496	0.206961	0.257184	0.177327		496	0.258093	0.237038	0.2711		496	0.202841	0.166166	0.179658
497	0.196799	0.172141	0.183101		497	0.205795	0.257277	0.176277		497	0.262612	0.240378	0.274065		497	0.200464	0.166293	0.179466
498	0.196214	0.170863	0.181238		498	0.205833	0.255682	0.175001		498	0.260972	0.237658	0.274275		498	0.202193	0.167136	0.180501
499	0.196845	0.172302	0.18353		499	0.206001	0.257418	0.174886		499	0.260068	0.236254	0.272495		499	0.199687	0.16725	0.181477
500	0.19914	0.16868	0.182988		500	0.204754	0.259566	0.175298		500	0.256766	0.239505	0.270163		500	0.199097	0.166404	0.183427
501	0.199539	0.170568	0.181321		501	0.204896	0.257947	0.177441		501	0.251331	0.23873	0.26558		501	0.19721	0.16783	0.184957
502	0.200171	0.169975	0.181617		502	0.205421	0.257774	0.179312		502	0.24925	0.235208	0.258479		502	0.196887	0.165518	0.185471
503	0.200907	0.171705	0.181413		503	0.203064	0.260185	0.178829		503	0.25313	0.236565	0.258273		503	0.194894	0.164858	0.186649
504	0.200525	0.170957	0.180379		504	0.202833	0.260747	0.178045		504	0.254046	0.238559	0.256613		504	0.194636	0.16586	0.185305
505	0.198174	0.17076	0.181477		505	0.20313	0.262779	0.17707		505	0.252998	0.233693	0.247477		505	0.194469	0.164532	0.184526
506	0.196907	0.169949	0.183295		506	0.202798	0.265805	0.175917		506	0.257528	0.230697	0.246136		506	0.196522	0.164362	0.184021
507	0.19708	0.169137	0.183982		507	0.206132	0.267287	0.175953		507	0.257877	0.23284	0.249681		507	0.195139	0.168339	0.183798
508	0.19839	0.168264	0.187398		508	0.209531	0.269321	0.175825		508	0.252937	0.23038	0.248965		508	0.197724	0.168458	0.183006
509	0.198999	0.166944	0.187361		509	0.212285	0.269174	0.17818		509	0.251058	0.230914	0.245598		509	0.194873	0.168619	0.183344
510	0.203562	0.167023	0.189405		510	0.214108	0.268478	0.179656		510	0.24873	0.232988	0.24781		510	0.194098	0.171016	0.183185
511	0.207509	0.167289	0.189009		511	0.214964	0.267944	0.181708		511	0.247445	0.233142	0.245844		511	0.192807	0.171997	0.182292
512	0.211532	0.168875	0.1928		512	0.215609	0.268442	0.180166		512	0.245633	0.229545	0.242144		512	0.191265	0.171052	0.181722
513	0.215123	0.167805	0.190634		513	0.215839	0.267964	0.181898		513	0.245114	0.229489	0.238047		513	0.188488	0.171294	0.182534
514	0.216739	0.17005	0.192689		514	0.216358	0.270589	0.181477		514	0.246251	0.227625	0.23597		514	0.189401	0.171476	0.182874
515	0.21732	0.169904	0.189659		515	0.218993	0.272103	0.181545		515	0.255014	0.22527	0.236131		515	0.187422	0.172291	0.182215
516	0.218585	0.171806	0.189983		516	0.221845	0.274241	0.179458		516	0.251978	0.225862	0.231196		516	0.184685	0.17161	0.181975
517	0.219435	0.1721	0.188545		517	0.222793	0.277411	0.179769		517	0.252408	0.227488	0.226805		517	0.183979	0.172002	0.181213
518	0.220034	0.173177	0.19065		518	0.224277	0.278448	0.178693		518	0.257733	0.229519	0.225356		518	0.183099	0.17314	0.179765
519	0.221773	0.170559	0.189923		519	0.224137	0.279585	0.176923		519	0.259097	0.230923	0.224959		519	0.181963	0.17412	0.179035
520	0.221695	0.171781	0.193563		520	0.223827	0.279837	0.17681		520	0.258195	0.230811	0.226732		520	0.182905	0.1728	0.17921
521	0.220836	0.169262	0.193828		521	0.222865	0.28132	0.178432		521	0.260252	0.229653	0.229457		521	0.18401	0.172625	0.179095
522	0.218563	0.167824	0.194068		522	0.220369	0.280282	0.179729		522	0.261624	0.230001	0.230985		522	0.184768	0.171791	0.178455
523	0.216407	0.166891	0.190359		523	0.218323	0.281366	0.179813		523	0.257319	0.231462	0.2281		523	0.183963	0.170216	0.178599
524	0.215177	0.167968	0.191801		524	0.217809	0.282059	0.182501		524	0.256673	0.231211	0.229664		524	0.185387	0.168176	0.178459
525	0.213761	0.168128	0.189708		525	0.214827	0.28201	0.180802		525	0.25087	0.231137	0.225034		525	0.186143	0.166934	0.178133
526	0.212899	0.166001	0.191053		526	0.211922	0.28094	0.177812		526	0.245639	0.232676	0.222614		526	0.185387	0.166905	0.178356
527	0.212317	0.166011	0.191126		527	0.21225	0.283031	0.174843		527	0.244428	0.232006	0.221477		527	0.184545	0.167118	0.178768
528	0.212254	0.166477	0.192157		528	0.213176	0.283792	0.174769		528	0.247054	0.229589	0.222612		528	0.184367	0.166895	0.177296
529	0.211589	0.165411	0.190462		529	0.214965	0.284134	0.171488		529	0.249278	0.230279	0.218189		529	0.182705	0.168195	0.177102
530	0.211678	0.163388	0.189137		530	0.217823	0.284137	0.170972		530	0.248728	0.229463	0.219612		530	0.180602	0.169505	0.177435
531	0.211843	0.166116	0.186802		531	0.221557	0.286492	0.172012		531	0.252751	0.228814	0.222878		531	0.180986	0.16881	0.177201
532	0.21231	0.168943	0.184736		532	0.22338	0.290471	0.172934		532	0.254697	0.231441	0.21994		532	0.184203	0.169596	0.176526
533	0.212727	0.169153	0.185034		533	0.224993	0.29234	0.170834		533	0.253297	0.232593	0.219534		533	0.183417	0.168909	0.175773
534	0.21211	0.172705	0.184926		534	0.225712	0.293618	0.172344		534	0.249773	0.233785	0.217799		534	0.183971	0.166454	0.175355
535	0.21151	0.175879	0.184228		535	0.226508	0.297317	0.171195		535	0.253096	0.239839	0.218624		535	0.183464	0.165584	0.172555
536	0.210171	0.176444	0.184931		536	0.227157	0.298578	0.170324		536	0.255655	0.243701	0.217404		536	0.18268	0.165286	0.171487
537	0.208998	0.173878	0.184851		537	0.228737	0.295849	0.170292		537	0.257956	0.244054	0.222188		537	0.180549	0.164564	0.171979
538	0.206851	0.176125	0.184116		538	0.229788	0.295291	0.171216		538	0.259785	0.246202	0.224678		538	0.181395	0.166045	0.172935
539	0.205836	0.172757	0.185305		539	0.230181	0.293493	0.169907		539	0.26173	0.247451	0.227452		539	0.180896	0.169846	0.172682
540	0.204631	0.171471	0.185189		540	0.231097	0.291776	0.17194		540	0.263605	0.24722	0.231495		540	0.181328	0.172987	0.173513
541	0.205131	0.172349	0.184869		541	0.23531	0.288808	0.1734		541	0.26404	0.24981	0.232544		541	0.181416	0.174774	0.174091
542	0.205581	0.171636	0.185841		542	0.23925	0.285156	0.173035		542	0.263542	0.252159	0.229683		542	0.180678	0.176149	0.174377
543	0.205534	0.173191	0.185076		543	0.245474	0.281419	0.174221		543	0.263562	0.255987	0.231617		543	0.180472	0.17614	0.174333
544	0.20604	0.175911	0.18278		544	0.249717	0.279448	0.176024		544	0.264061	0.257383	0.230687		544	0.18071	0.175616	0.175294
545	0.204143	0.175761	0.184519		545	0.252773	0.278514	0.177134		545	0.265256	0.259145	0.227177		545	0.181042	0.173121	0.176461
546	0.202516	0.176153	0.184487		546	0.255114	0.276543	0.176859		546	0.262636	0.262058	0.229416		546	0.181936	0.173295	0.176488
547	0.200505	0.179692	0.1831		547	0.257323	0.274913	0.17873		547	0.264306	0.263602	0.236304		547	0.18378	0.173459	0.177167
548	0.19864	0.177388	0.183437		548	0.256851	0.2719	0.179314		548	0.269915	0.267008	0.241136		548	0.185051	0.173957	0.178088
549	0.193674	0.178941	0.184785		549	0.259947	0.269735	0.18026		549	0.271457	0.270314	0.2546		549	0.185248	0.173973	0.17769
550	0.194437	0.181	0.183493		550	0.263519	0.264919	0.182849		550	0.272165	0.269298	0.258464		550	0.185841	0.174789	0.179103
551	0.193912	0.180062	0.182824		551	0.265523	0.261684	0.184606		551	0.277061	0.271647	0.260759		551	0.184016	0.175013	0.179561
552	0.193522	0.177828	0.182693		552	0.266214	0.261926	0.186198		552	0.280961	0.273805	0.262664		552	0.181569	0.1733	0.179491
553	0.192975	0.177372	0.184758		553	0.26923	0.26408	0.189105		553	0.275256	0.27041	0.260744		553	0.17781	0.172631	0.180334
554	0.194735	0.176245	0.183117		554	0.268785	0.261963	0.192797		554	0.274481	0.27185	0.255912		554	0.175613	0.173177	0.180415
555	0.193644	0.175879	0.185216		555	0.271772	0.25949	0.19364		555	0.272029	0.275981	0.254275		555	0.173558	0.173812	0.178839
556	0.190754	0.178517	0.187756		556	0.274803	0.261213	0.195705		556	0.268146	0.274497	0.257665		556	0.173266	0.174777	0.177883
557	0.190118	0.178763	0.188908		557	0.275911	0.256331	0.196818		557	0.261408	0.278782	0.254492		557	0.171135	0.174627	0.177206
558	0.189641	0.179497	0.185723		558	0.274397	0.251063	0.196183		558	0.261498	0.283528	0.255946		558	0.17223	0.175286	0.176235
559	0.191424	0.179153	0.186583		559	0.277018	0.250232	0.196203		559	0.265076	0.281912	0.248516		559	0.173674	0.175437	0.175429
560	0.191465	0.176415	0.183027		560	0.2765	0.251002	0.196817		560	0.267549	0.285653	0.245312		560	0.174833	0.175044	0.176563
561	0.192069	0.17602	0.180665		561	0.273238	0.247465	0.19586		561	0.271476	0.288708	0.236333		561	0.174662	0.174522	0.177566
562	0.192701	0.176849	0.180303		562	0.274346	0.247878	0.194621		562	0.271994	0.288677	0.23587		562	0.175443	0.177275	0.177595
563	0.192029	0.177066	0.181469		563	0.275854	0.247618	0.195018		563	0.270269	0.290367	0.230101		563	0.174984	0.180398	0.175943
564	0.191095	0.179693	0.181597		564	0.275077	0.246978	0.193301		564	0.264425	0.291478	0.231562		564	0.175575	0.180721	0.176021
565	0.19149	0.181349	0.184307		565	0.271712	0.243514	0.190959		565	0.261803	0.292755	0.23017		565	0.17606	0.183093	0.175246
566	0.191663	0.178363	0.182835		566	0.269958	0.242765	0.190045		566	0.262013	0.294252	0.228711		566	0.176068	0.186961	0.173888
567	0.189937	0.177162	0.181185		567	0.266967	0.240717	0.190474		567	0.266302	0.292446	0.2243		567	0.179153	0.188756	0.173552
568	0.189669	0.178745	0.179491		568	0.266612	0.241054	0.188994		568	0.269132	0.294694	0.221095		568	0.182521	0.189782	0.174468
569	0.186729	0.174086	0.178517		569	0.267068	0.240923	0.190095		569	0.277052	0.29809	0.218126		569	0.184868	0.192308	0.176731
570	0.184829	0.175832	0.176376		570	0.269013	0.24079	0.189285		570	0.272547	0.299117	0.218281		570	0.18366	0.193928	0.17712
571	0.183741	0.178382	0.175992		571	0.271336	0.239604	0.189851		571	0.268603	0.298364	0.21827		571	0.185388	0.19344	0.178506
572	0.182759	0.178901	0.17611		572	0.274015	0.237519	0.188382		572	0.267586	0.301937	0.22058		572	0.18414	0.194392	0.17878
573	0.182121	0.178677	0.178742		573	0.271738	0.233106	0.186569		573	0.264645	0.296299	0.22249		573	0.181267	0.197336	0.178087
574	0.182803	0.181079	0.179227		574	0.269426	0.23281	0.183725		574	0.261095	0.295041	0.22622		574	0.178323	0.200514	0.176557
575	0.183763	0.176007	0.179591		575	0.270055	0.233338	0.183981		575	0.262258	0.292972	0.22754		575	0.178826	0.201496	0.17644
576	0.182717	0.174399	0.181617		576	0.268398	0.232794	0.183065		576	0.258709	0.292008	0.227001		576	0.177387	0.204882	0.176061
577	0.182804	0.175728	0.182948		577	0.267733	0.23454	0.182497		577	0.255236	0.283827	0.225277		577	0.178064	0.207731	0.175795
578	0.183353	0.173268	0.182517		578	0.267289	0.234427	0.182745		578	0.254963	0.286111	0.222974		578	0.179494	0.206559	0.17654
579	0.184054	0.170774	0.182057		579	0.265561	0.229645	0.182955		579	0.252298	0.283442	0.220384		579	0.179054	0.20448	0.175843
580	0.184562	0.173283	0.182544		580	0.26346	0.227096	0.180954		580	0.257197	0.278075	0.220895		580	0.17864	0.205458	0.175054
581	0.189052	0.172548	0.182588		581	0.260552	0.224081	0.179608		581	0.260415	0.271618	0.223663		581	0.178587	0.204131	0.174879
582	0.191835	0.172979	0.181901		582	0.258365	0.221365	0.179642		582	0.264119	0.272084	0.222548		582	0.177374	0.201616	0.174271
583	0.197592	0.173778	0.183561		583	0.256937	0.220449	0.179713		583	0.264004	0.26865	0.22555		583	0.175571	0.203212	0.172964
584	0.201857	0.177599	0.185		584	0.257407	0.220864	0.177565		584	0.265493	0.265487	0.221637		584	0.175564	0.204559	0.172678
585	0.204619	0.175918	0.186798		585	0.255874	0.218162	0.177977		585	0.26402	0.261365	0.221429		585	0.174269	0.203877	0.172256
586	0.20562	0.175832	0.183641		586	0.255531	0.218766	0.177522		586	0.265472	0.258468	0.216713		586	0.173108	0.202118	0.17196
587	0.208651	0.17375	0.183553		587	0.255201	0.216504	0.176215		587	0.259992	0.25713	0.217548		587	0.171718	0.20388	0.171249
588	0.206052	0.174573	0.182153		588	0.2561	0.214985	0.174453		588	0.26142	0.25394	0.217335		588	0.171547	0.201534	0.17121
589	0.205317	0.173572	0.180695		589	0.255602	0.212755	0.174303		589	0.258439	0.250223	0.219685		589	0.170995	0.201097	0.169912
590	0.205657	0.176479	0.17846		590	0.2555	0.213082	0.172759		590	0.259233	0.246765	0.217641		590	0.171817	0.202138	0.168067
591	0.202843	0.180962	0.181094		591	0.258148	0.209712	0.172859		591	0.257554	0.244137	0.222874		591	0.171752	0.202369	0.167159
592	0.201639	0.183919	0.18287		592	0.255302	0.212132	0.171904		592	0.258922	0.238329	0.222216		592	0.172088	0.203161	0.166328
593	0.201828	0.185145	0.18246		593	0.254281	0.212017	0.172201		593	0.258114	0.233114	0.221984		593	0.171179	0.20096	0.16718
594	0.199802	0.184456	0.182626		594	0.252741	0.212674	0.171782		594	0.261802	0.23078	0.225917		594	0.170074	0.200261	0.167309
595	0.199122	0.182445	0.180427		595	0.253389	0.211929	0.171357		595	0.258169	0.230005	0.226813		595	0.16876	0.198461	0.167932
596	0.201833	0.177272	0.179473		596	0.252239	0.211243	0.169359		596	0.257496	0.231346	0.224676		596	0.169316	0.200783	0.169227
597	0.199145	0.175925	0.178124		597	0.253752	0.20905	0.168397		597	0.258568	0.229992	0.224364		597	0.169569	0.200008	0.170793
598	0.199402	0.173861	0.178569		598	0.253873	0.209336	0.165802		598	0.261988	0.230033	0.221825		598	0.170239	0.201303	0.17042
599	0.20128	0.173566	0.179059		599	0.253763	0.206849	0.166078		599	0.255666	0.230336	0.221733		599	0.17046	0.201724	0.170827
600	0.202629	0.174147	0.182834		600	0.252886	0.204108	0.165345		600	0.255497	0.228958	0.221133		600	0.170235	0.202875	0.172648

## Sheet: graph
Figure 1A
Fluctuation-positive cells (%)					Fluctuation amplitude(ΔF340/F380)					Fluctuation frequency(events/500 s)
Vehicle	30 nM CNP	300 nM CNP	300 nM ANP		Vehicle	30 nM CNP	300 nM CNP	300 nM ANP		Vehicle	30 nM CNP	300 nM CNP	300 nM ANP
56.6667	70	93.3333	36.6667		0.0458354	0.0609793	0.0741268	0.0561829		1.70588	1.7619	3.25	1.81818
46.6667	66.6667	63.3333	56.6667		0.0564872	0.0643976	0.0529906	0.0516191		2.85714	1.75	2.31579	2.41176
53.3333	40	83.3333	60		0.0516369	0.0522474	0.0871875	0.0576889		3	1.75	2.2	1.94444
36.6667	40	63.3333	63.3333		0.0504291	0.0467341	0.0691857	0.0507198		1.72727	1.66667	2.52632	1.78947
23.3333	60	63.3333	30		0.045462	0.0564007	0.061435	0.0436321		1.28571	2	2.47368	1.44444
43.3333	63.3333	60	50		0.0404294	0.0551521	0.0778641	0.03857		1.23077	1.94737	2.77778	1.6
43.3333	73.3333	73.3333			0.0560831	0.0603254	0.0684444			2.30769	2.04545	1.86364
63.3333	63.3333	86.6667			0.0443692	0.0654806	0.0715833			1.68421	2.15789	2.69231
40	70	80			0.0465496	0.059325	0.0734632			1.75	1.85714	2.20833
56.6667		90			0.0598749		0.0716004			2.05882		2.18519
53.3333		76.6667			0.0456315		0.0828356			2.3125		2.30435
50					0.0449458					1.46667
56.6667					0.0497705					1.64706
