# Supplementary material for: C-type natriuretic peptide facilitates autonomic Ca2+ entry in growth plate chondrocytes for stimulating bone growth
Source: eLife. 2022 Mar 15;11:e71931. doi: 10.7554/eLife.71931 (PMC8923661; doi:10.7554/eLife.71931)
Supplement: Figure 1—source data 2. [file elife-71931-fig1-data2.xlsx]

## Sheet: trace
Figure 1B
300 nM CNP
Npr2fl/fl, Col2a1-Cre-/-					Npr2fl/fl, Col2a1-Cre+/-
Times (s)	Cell1	Cell2	Cell3		Times (s)	Cell1	Cell2	Cell3
0	0.228877	0.242724	0.212962		0	0.166122	0.212945	0.222788
1	0.227058	0.246118	0.213149		1	0.168512	0.210988	0.225402
2	0.226475	0.250359	0.215404		2	0.167426	0.212043	0.226596
3	0.22591	0.254675	0.216533		3	0.170322	0.211239	0.227328
4	0.227293	0.26165	0.220246		4	0.170614	0.210439	0.226708
5	0.228016	0.261539	0.220036		5	0.168838	0.208501	0.230937
6	0.230334	0.265422	0.222234		6	0.165462	0.20952	0.229382
7	0.230445	0.264872	0.219648		7	0.164552	0.209987	0.2282
8	0.230105	0.271106	0.22035		8	0.161499	0.210352	0.229055
9	0.227891	0.276461	0.219187		9	0.16396	0.211171	0.231628
10	0.228051	0.287184	0.221055		10	0.165245	0.211961	0.22878
11	0.226274	0.289623	0.220084		11	0.168258	0.209049	0.229323
12	0.227052	0.29521	0.2238		12	0.169656	0.205425	0.232071
13	0.225541	0.294047	0.220708		13	0.172191	0.203632	0.230285
14	0.227542	0.295505	0.217824		14	0.170902	0.200218	0.229272
15	0.228054	0.293804	0.217086		15	0.174034	0.198697	0.228152
16	0.228002	0.29458	0.21556		16	0.173247	0.199049	0.22797
17	0.22872	0.296485	0.21395		17	0.17484	0.200388	0.225471
18	0.23096	0.296745	0.21636		18	0.174944	0.200791	0.224713
19	0.2305	0.298954	0.218477		19	0.176008	0.200278	0.226676
20	0.230513	0.300584	0.22138		20	0.173895	0.1989	0.227194
21	0.229745	0.304258	0.221111		21	0.174593	0.196097	0.229053
22	0.226771	0.305881	0.220833		22	0.174609	0.191636	0.230296
23	0.226257	0.307039	0.220546		23	0.170857	0.189064	0.233847
24	0.225933	0.305107	0.221546		24	0.171806	0.189452	0.233406
25	0.224373	0.305174	0.217948		25	0.172114	0.188105	0.234631
26	0.224592	0.304588	0.218976		26	0.172104	0.189443	0.23317
27	0.227641	0.299958	0.218551		27	0.170742	0.191709	0.234708
28	0.225651	0.298891	0.215843		28	0.170437	0.190538	0.232301
29	0.223767	0.290627	0.215847		29	0.169377	0.188779	0.232075
30	0.224297	0.285702	0.217741		30	0.169362	0.190736	0.231982
31	0.224001	0.277136	0.219169		31	0.168139	0.191697	0.23212
32	0.220551	0.273359	0.219467		32	0.166807	0.191926	0.231945
33	0.222404	0.267929	0.221012		33	0.168262	0.191785	0.233566
34	0.222942	0.266372	0.220958		34	0.166029	0.193124	0.233348
35	0.221301	0.261135	0.218415		35	0.163373	0.192032	0.232751
36	0.221272	0.259081	0.217782		36	0.161848	0.191892	0.232226
37	0.223752	0.253967	0.217592		37	0.164481	0.193397	0.23211
38	0.222882	0.249052	0.220886		38	0.163705	0.196666	0.232304
39	0.220469	0.246059	0.217629		39	0.163091	0.200089	0.231843
40	0.221233	0.243304	0.218192		40	0.163879	0.202833	0.232822
41	0.223602	0.238046	0.216216		41	0.166006	0.205969	0.233091
42	0.223313	0.236581	0.214572		42	0.16469	0.205568	0.232346
43	0.223576	0.233636	0.212221		43	0.165318	0.206822	0.231606
44	0.223124	0.230877	0.213818		44	0.165989	0.207105	0.233346
45	0.222417	0.22537	0.214132		45	0.165449	0.205308	0.236136
46	0.218782	0.223098	0.213537		46	0.164792	0.201266	0.238332
47	0.217105	0.219302	0.214753		47	0.161894	0.200887	0.23918
48	0.217497	0.216942	0.211874		48	0.159633	0.197	0.23928
49	0.218962	0.214579	0.211057		49	0.160061	0.193807	0.237875
50	0.21763	0.212139	0.209749		50	0.159249	0.194001	0.23465
51	0.220114	0.211764	0.213184		51	0.158055	0.193138	0.233395
52	0.221624	0.209637	0.212539		52	0.160674	0.190791	0.231013
53	0.219478	0.208431	0.216304		53	0.161939	0.191298	0.230407
54	0.220568	0.205704	0.217576		54	0.162671	0.190003	0.22865
55	0.221747	0.205467	0.22003		55	0.16475	0.188439	0.228531
56	0.220017	0.202456	0.218242		56	0.165949	0.189757	0.227985
57	0.220289	0.20048	0.218694		57	0.16683	0.190156	0.227918
58	0.220635	0.198562	0.219116		58	0.167645	0.189026	0.226585
59	0.219154	0.200237	0.219969		59	0.168848	0.188303	0.226271
60	0.218118	0.199814	0.219663		60	0.167477	0.187698	0.225579
61	0.219468	0.197558	0.222223		61	0.167251	0.186423	0.22431
62	0.220435	0.197398	0.225674		62	0.166366	0.187203	0.223245
63	0.22233	0.196889	0.225476		63	0.169365	0.187408	0.222607
64	0.224961	0.193036	0.225986		64	0.167979	0.187421	0.221284
65	0.227331	0.192027	0.228409		65	0.170672	0.18808	0.219393
66	0.22784	0.196895	0.228937		66	0.170887	0.188125	0.216669
67	0.225786	0.198574	0.228855		67	0.171799	0.185875	0.214322
68	0.22518	0.202823	0.232644		68	0.171739	0.185328	0.213709
69	0.224868	0.206376	0.233036		69	0.172451	0.183747	0.211575
70	0.222595	0.21271	0.232528		70	0.170494	0.182451	0.210605
71	0.222398	0.214455	0.233842		71	0.172669	0.180557	0.211809
72	0.223902	0.218554	0.235169		72	0.174804	0.178982	0.211266
73	0.22444	0.220389	0.235701		73	0.178383	0.17854	0.209708
74	0.22389	0.221815	0.239085		74	0.182596	0.178373	0.210617
75	0.224719	0.219626	0.238561		75	0.18878	0.177072	0.210436
76	0.223829	0.220212	0.239709		76	0.195083	0.178524	0.209045
77	0.220499	0.218672	0.238836		77	0.202988	0.177576	0.211994
78	0.220073	0.217372	0.238664		78	0.204825	0.176337	0.213943
79	0.219921	0.219514	0.237742		79	0.207993	0.175661	0.214551
80	0.221233	0.218987	0.240941		80	0.211194	0.176108	0.212471
81	0.22227	0.217153	0.24173		81	0.211927	0.173705	0.214664
82	0.224392	0.216903	0.242444		82	0.212679	0.174658	0.215512
83	0.225068	0.216112	0.244522		83	0.213233	0.175239	0.214711
84	0.224825	0.213554	0.247783		84	0.215536	0.177473	0.21945
85	0.223581	0.214872	0.249938		85	0.214828	0.178357	0.223264
86	0.221313	0.217284	0.251191		86	0.217404	0.179233	0.224719
87	0.222965	0.216707	0.258946		87	0.216814	0.178843	0.223721
88	0.222267	0.220079	0.259537		88	0.221109	0.180405	0.224077
89	0.222694	0.222291	0.261059		89	0.222512	0.180395	0.221172
90	0.224067	0.223535	0.264036		90	0.225943	0.180512	0.220037
91	0.226709	0.222579	0.270861		91	0.225037	0.180287	0.217871
92	0.225565	0.224977	0.273633		92	0.225731	0.181929	0.217343
93	0.225835	0.223279	0.280307		93	0.226352	0.181252	0.216887
94	0.22673	0.224118	0.287262		94	0.226277	0.181827	0.21562
95	0.225886	0.223333	0.297171		95	0.226841	0.181911	0.217673
96	0.227797	0.222054	0.303499		96	0.228491	0.183953	0.215546
97	0.229227	0.22125	0.311964		97	0.231456	0.185074	0.211646
98	0.231309	0.219511	0.320108		98	0.233755	0.185595	0.212381
99	0.231455	0.217924	0.328313		99	0.237644	0.18608	0.211435
100	0.232853	0.218496	0.32821		100	0.240465	0.187156	0.206736
101	0.230267	0.219964	0.331032		101	0.245968	0.187249	0.207147
102	0.228697	0.222582	0.329113		102	0.24911	0.187334	0.207865
103	0.226412	0.225384	0.327234		103	0.251384	0.186745	0.205351
104	0.225559	0.227553	0.324472		104	0.254522	0.186162	0.202762
105	0.226349	0.23198	0.324032		105	0.258283	0.186283	0.205088
106	0.230568	0.238628	0.321621		106	0.259485	0.185594	0.204841
107	0.232868	0.242191	0.321854		107	0.261048	0.185126	0.205244
108	0.23386	0.249657	0.32339		108	0.263726	0.187478	0.20491
109	0.236953	0.256288	0.321847		109	0.264608	0.190968	0.205767
110	0.237306	0.259522	0.31934		110	0.262057	0.194026	0.203514
111	0.23541	0.26426	0.316557		111	0.261321	0.196043	0.201327
112	0.236592	0.2697	0.317812		112	0.261889	0.19871	0.198241
113	0.237448	0.271209	0.312488		113	0.260381	0.198506	0.196537
114	0.235391	0.274201	0.311349		114	0.257326	0.199857	0.19533
115	0.236022	0.279931	0.314025		115	0.25884	0.198516	0.195167
116	0.235328	0.281981	0.314879		116	0.259178	0.202092	0.196803
117	0.233957	0.288021	0.310366		117	0.256067	0.2034	0.199545
118	0.234392	0.294144	0.309947		118	0.254211	0.206521	0.199497
119	0.235277	0.301117	0.309522		119	0.255735	0.208484	0.200489
120	0.234568	0.306247	0.303195		120	0.256015	0.210445	0.199204
121	0.235623	0.306676	0.298689		121	0.254795	0.212162	0.197939
122	0.235928	0.308085	0.296773		122	0.257193	0.215894	0.197437
123	0.237094	0.307312	0.293375		123	0.256671	0.219412	0.200018
124	0.235236	0.30681	0.285853		124	0.25323	0.220854	0.200509
125	0.236491	0.303724	0.282548		125	0.248358	0.225834	0.2035
126	0.235109	0.307068	0.277782		126	0.243666	0.228889	0.202805
127	0.234887	0.306954	0.272469		127	0.240117	0.231443	0.201641
128	0.233031	0.306112	0.271066		128	0.24014	0.234237	0.201589
129	0.23543	0.305585	0.26912		129	0.241824	0.237452	0.199909
130	0.236037	0.306558	0.262117		130	0.244298	0.241804	0.19909
131	0.237785	0.305806	0.255676		131	0.249773	0.243843	0.200526
132	0.239295	0.298873	0.251884		132	0.246648	0.245834	0.202736
133	0.241247	0.296935	0.244657		133	0.242323	0.246277	0.203037
134	0.244162	0.29436	0.238557		134	0.240793	0.24889	0.205011
135	0.240904	0.293402	0.236824		135	0.238719	0.246243	0.206173
136	0.242838	0.29054	0.236647		136	0.233318	0.246127	0.208828
137	0.242572	0.292736	0.231244		137	0.236699	0.246715	0.20941
138	0.242095	0.294498	0.227188		138	0.238925	0.245059	0.210067
139	0.240355	0.291188	0.226327		139	0.23354	0.242222	0.210445
140	0.243488	0.283993	0.227556		140	0.232208	0.241548	0.210065
141	0.242825	0.282475	0.224676		141	0.23384	0.243022	0.206645
142	0.241116	0.277551	0.222557		142	0.231355	0.24047	0.205116
143	0.240725	0.272118	0.223218		143	0.226447	0.24029	0.204391
144	0.24112	0.273125	0.223945		144	0.226697	0.236972	0.203144
145	0.240325	0.27634	0.220451		145	0.225647	0.235711	0.203601
146	0.239842	0.276374	0.221555		146	0.223647	0.229636	0.203894
147	0.241002	0.277846	0.222928		147	0.219606	0.225317	0.204339
148	0.242394	0.279422	0.221521		148	0.22182	0.222947	0.202483
149	0.240509	0.276227	0.217716		149	0.226195	0.222827	0.204259
150	0.240745	0.274187	0.216441		150	0.22589	0.222073	0.203566
151	0.241358	0.273372	0.217507		151	0.227444	0.223207	0.203658
152	0.241636	0.270805	0.217454		152	0.231395	0.225605	0.20422
153	0.239204	0.270694	0.22022		153	0.232245	0.225746	0.204445
154	0.239418	0.270546	0.221754		154	0.230895	0.22618	0.203076
155	0.238544	0.269095	0.22237		155	0.231073	0.226849	0.202812
156	0.236737	0.266304	0.221857		156	0.229187	0.225027	0.20554
157	0.236757	0.268354	0.221082		157	0.229335	0.222038	0.206468
158	0.237833	0.268561	0.218771		158	0.227354	0.219736	0.209059
159	0.235027	0.26583	0.219871		159	0.226919	0.217715	0.211499
160	0.236337	0.266829	0.219831		160	0.227311	0.214557	0.212775
161	0.235588	0.269139	0.218038		161	0.227035	0.21409	0.214818
162	0.235106	0.268441	0.218269		162	0.224306	0.215739	0.215764
163	0.234321	0.268411	0.216983		163	0.224983	0.217943	0.213538
164	0.237344	0.271644	0.216102		164	0.223323	0.21797	0.212507
165	0.237344	0.26944	0.218358		165	0.221834	0.217846	0.211523
166	0.239149	0.266452	0.218729		166	0.222302	0.21601	0.208945
167	0.240395	0.266315	0.218681		167	0.222061	0.211432	0.207493
168	0.243038	0.264179	0.220899		168	0.224227	0.209986	0.210595
169	0.243373	0.265952	0.219715		169	0.226982	0.207235	0.210442
170	0.24576	0.270305	0.218865		170	0.229587	0.206432	0.211101
171	0.244801	0.270966	0.217664		171	0.22968	0.208757	0.213003
172	0.243997	0.267532	0.218297		172	0.231175	0.212279	0.215178
173	0.242933	0.269801	0.216759		173	0.228315	0.212402	0.215825
174	0.245043	0.265345	0.219278		174	0.227417	0.216894	0.213519
175	0.245512	0.261837	0.219035		175	0.224077	0.2178	0.214412
176	0.249849	0.260363	0.220998		176	0.224336	0.218028	0.21398
177	0.253854	0.263223	0.220838		177	0.224074	0.21734	0.212828
178	0.257374	0.261342	0.22086		178	0.223311	0.21613	0.210384
179	0.263036	0.264997	0.218224		179	0.220535	0.213428	0.212639
180	0.264967	0.265116	0.216313		180	0.219341	0.212	0.213797
181	0.269401	0.264459	0.213128		181	0.217434	0.207629	0.211412
182	0.273626	0.265457	0.212667		182	0.216105	0.207567	0.210822
183	0.280181	0.263885	0.210372		183	0.218046	0.207787	0.209487
184	0.282295	0.264796	0.209911		184	0.218512	0.207495	0.20948
185	0.290625	0.266075	0.211452		185	0.218617	0.208811	0.208277
186	0.297543	0.27145	0.214173		186	0.218689	0.211619	0.208946
187	0.304962	0.273677	0.211725		187	0.219858	0.212607	0.209596
188	0.314027	0.27414	0.211603		188	0.217767	0.214532	0.213291
189	0.329047	0.272918	0.213336		189	0.2192	0.215012	0.216266
190	0.340378	0.275062	0.21436		190	0.2193	0.214102	0.216752
191	0.353074	0.275368	0.21322		191	0.214808	0.214548	0.217471
192	0.361946	0.273726	0.214129		192	0.212477	0.216108	0.217197
193	0.369322	0.275291	0.216277		193	0.211223	0.216954	0.216822
194	0.368911	0.277305	0.214636		194	0.207784	0.219707	0.21492
195	0.36874	0.276924	0.213501		195	0.208151	0.222679	0.214737
196	0.363961	0.274345	0.210526		196	0.208643	0.22476	0.21679
197	0.360055	0.272958	0.211817		197	0.207505	0.224161	0.218418
198	0.352883	0.27314	0.211639		198	0.203562	0.222809	0.21918
199	0.34914	0.269639	0.210831		199	0.203451	0.222454	0.223379
200	0.346936	0.268066	0.208887		200	0.200491	0.220539	0.225432
201	0.342757	0.265508	0.211108		201	0.199157	0.217932	0.225856
202	0.338778	0.265012	0.208838		202	0.198403	0.214938	0.228644
203	0.331838	0.26133	0.206974		203	0.198589	0.212846	0.232222
204	0.323595	0.258971	0.209713		204	0.195822	0.209884	0.233434
205	0.313482	0.256961	0.209215		205	0.196617	0.208395	0.236792
206	0.302328	0.256643	0.207899		206	0.198022	0.210534	0.242353
207	0.29259	0.255701	0.208583		207	0.194848	0.212439	0.245143
208	0.286456	0.257374	0.209425		208	0.192962	0.213384	0.246964
209	0.281208	0.258736	0.205981		209	0.193834	0.213929	0.249305
210	0.275042	0.258964	0.208185		210	0.192894	0.216694	0.251033
211	0.272107	0.261807	0.211897		211	0.189684	0.218132	0.250308
212	0.268712	0.263315	0.213478		212	0.193038	0.217198	0.252078
213	0.263801	0.264474	0.212644		213	0.195036	0.218666	0.251155
214	0.257602	0.265162	0.213039		214	0.195397	0.219548	0.251758
215	0.253125	0.265652	0.211512		215	0.194946	0.217314	0.252752
216	0.249721	0.266216	0.208757		216	0.198052	0.214286	0.252985
217	0.246038	0.267126	0.208497		217	0.195523	0.214779	0.253169
218	0.245472	0.266884	0.209428		218	0.195917	0.213501	0.255893
219	0.245505	0.268288	0.211428		219	0.193094	0.212004	0.25562
220	0.242849	0.27391	0.211662		220	0.191409	0.21138	0.256698
221	0.239186	0.274929	0.213477		221	0.188579	0.209511	0.25772
222	0.236461	0.280127	0.214335		222	0.188543	0.207884	0.256168
223	0.232719	0.283258	0.216043		223	0.189186	0.205958	0.255841
224	0.230721	0.283748	0.214838		224	0.191263	0.206076	0.255108
225	0.230277	0.283123	0.214658		225	0.192859	0.206283	0.253663
226	0.232153	0.286759	0.212042		226	0.191739	0.208776	0.252457
227	0.232766	0.285469	0.209157		227	0.190166	0.209857	0.254341
228	0.232651	0.287376	0.208577		228	0.187674	0.211557	0.255334
229	0.232328	0.291285	0.210638		229	0.185604	0.211516	0.254953
230	0.231435	0.289479	0.211336		230	0.186014	0.211949	0.255005
231	0.227992	0.2899	0.213571		231	0.185921	0.212616	0.254992
232	0.227726	0.292556	0.212954		232	0.186977	0.215987	0.253148
233	0.22883	0.29157	0.212767		233	0.188589	0.219607	0.251358
234	0.227724	0.294317	0.211364		234	0.18811	0.222593	0.251417
235	0.227596	0.29613	0.212804		235	0.186497	0.226622	0.250534
236	0.229708	0.294859	0.208961		236	0.186818	0.227203	0.250112
237	0.230166	0.296543	0.209835		237	0.188477	0.228096	0.24863
238	0.228451	0.29869	0.207512		238	0.188816	0.23167	0.248276
239	0.228824	0.297636	0.206316		239	0.190137	0.232601	0.24927
240	0.228218	0.304142	0.203602		240	0.191497	0.23241	0.249072
241	0.226443	0.307626	0.205336		241	0.192171	0.235572	0.24731
242	0.226971	0.305206	0.205122		242	0.191094	0.233726	0.248216
243	0.225749	0.306793	0.204553		243	0.189801	0.228043	0.248579
244	0.225369	0.307808	0.20425		244	0.189106	0.226222	0.246207
245	0.224859	0.301911	0.205017		245	0.187976	0.223384	0.243849
246	0.226103	0.300012	0.203827		246	0.188807	0.218827	0.242875
247	0.22397	0.299383	0.205184		247	0.188433	0.216872	0.241104
248	0.22453	0.300454	0.206942		248	0.186516	0.215443	0.239952
249	0.223867	0.302801	0.206767		249	0.187377	0.215348	0.239517
250	0.223254	0.308992	0.207489		250	0.18711	0.214219	0.240093
251	0.22186	0.311569	0.208367		251	0.187996	0.212286	0.242134
252	0.222376	0.316262	0.208297		252	0.186621	0.211941	0.242265
253	0.222202	0.316489	0.207753		253	0.188409	0.212046	0.240352
254	0.221857	0.315806	0.209328		254	0.188208	0.207932	0.237282
255	0.224035	0.315104	0.209335		255	0.186105	0.205794	0.239249
256	0.22295	0.316084	0.209794		256	0.184294	0.205114	0.234088
257	0.223571	0.314114	0.208779		257	0.184326	0.201432	0.230145
258	0.224265	0.315289	0.212191		258	0.184561	0.198312	0.22631
259	0.223455	0.315222	0.210377		259	0.183986	0.197952	0.226491
260	0.220713	0.31536	0.209255		260	0.187217	0.199438	0.222716
261	0.22115	0.311953	0.211724		261	0.18547	0.200187	0.221656
262	0.220406	0.314745	0.211678		262	0.188093	0.201692	0.221172
263	0.21998	0.312186	0.209835		263	0.188396	0.201201	0.221522
264	0.220581	0.30808	0.212311		264	0.186579	0.201965	0.217411
265	0.219664	0.305925	0.212006		265	0.184265	0.200721	0.215226
266	0.219571	0.304727	0.21004		266	0.18328	0.199679	0.214296
267	0.217003	0.300689	0.209529		267	0.181703	0.200603	0.213649
268	0.215713	0.296714	0.209387		268	0.179964	0.201003	0.210962
269	0.215918	0.298148	0.207768		269	0.18248	0.201399	0.211706
270	0.218803	0.29477	0.208173		270	0.182387	0.202548	0.209776
271	0.219732	0.292933	0.208873		271	0.182172	0.202922	0.209888
272	0.221034	0.290532	0.210426		272	0.180779	0.202936	0.209474
273	0.223089	0.28909	0.209134		273	0.179119	0.20374	0.211817
274	0.220938	0.284084	0.208838		274	0.175933	0.202348	0.211445
275	0.218715	0.281605	0.208942		275	0.175455	0.200319	0.211553
276	0.216238	0.278718	0.208384		276	0.175315	0.199256	0.212907
277	0.215322	0.276418	0.205943		277	0.174635	0.195722	0.214071
278	0.212902	0.275262	0.20527		278	0.175224	0.194259	0.214205
279	0.21388	0.27612	0.203163		279	0.174065	0.191864	0.217483
280	0.212357	0.27704	0.203463		280	0.174947	0.190157	0.220891
281	0.210513	0.282462	0.202694		281	0.1765	0.18877	0.222839
282	0.20969	0.282831	0.202698		282	0.177317	0.190421	0.222424
283	0.20919	0.289053	0.203127		283	0.179252	0.19181	0.224876
284	0.207665	0.291533	0.204451		284	0.178069	0.195041	0.225585
285	0.208155	0.293832	0.204463		285	0.175353	0.195889	0.227292
286	0.209314	0.291423	0.203406		286	0.172962	0.196639	0.229167
287	0.209087	0.293454	0.202213		287	0.170302	0.196837	0.232936
288	0.209525	0.292418	0.201438		288	0.168954	0.197221	0.233077
289	0.208449	0.293334	0.202059		289	0.171456	0.195959	0.234445
290	0.208111	0.293205	0.1986		290	0.172051	0.197423	0.234614
291	0.207367	0.294956	0.198043		291	0.174261	0.199179	0.235698
292	0.208765	0.2948	0.200856		292	0.176433	0.201005	0.23733
293	0.208955	0.292449	0.202487		293	0.175755	0.202684	0.240128
294	0.209047	0.289388	0.200699		294	0.174292	0.205532	0.241836
295	0.209669	0.289634	0.203812		295	0.174339	0.204707	0.245012
296	0.210824	0.288817	0.20362		296	0.173002	0.2043	0.244904
297	0.208679	0.28633	0.199297		297	0.170786	0.202836	0.245758
298	0.207819	0.284751	0.198444		298	0.168958	0.200139	0.247668
299	0.208846	0.283153	0.198914		299	0.169698	0.198392	0.251689
300	0.20916	0.282237	0.198571		300	0.169603	0.199946	0.251649
301	0.209176	0.281464	0.199899		301	0.169651	0.200912	0.255269
302	0.210343	0.282481	0.200777		302	0.169992	0.199629	0.25699
303	0.209572	0.28346	0.200245		303	0.171632	0.199888	0.259211
304	0.208806	0.284004	0.198871		304	0.172928	0.200606	0.259086
305	0.208805	0.283358	0.196301		305	0.172508	0.199235	0.261154
306	0.209497	0.280126	0.195757		306	0.174003	0.19873	0.261834
307	0.209999	0.279276	0.196517		307	0.17471	0.202234	0.263593
308	0.210813	0.278294	0.197388		308	0.176303	0.204861	0.266238
309	0.211531	0.278483	0.199792		309	0.175908	0.203764	0.267726
310	0.210799	0.272572	0.204342		310	0.177077	0.204261	0.272371
311	0.210754	0.273483	0.203052		311	0.176246	0.203602	0.275332
312	0.210705	0.270446	0.202387		312	0.175004	0.202937	0.276266
313	0.21049	0.269755	0.201067		313	0.173172	0.19889	0.277456
314	0.211899	0.267896	0.199847		314	0.170329	0.199114	0.27588
315	0.211469	0.270029	0.197024		315	0.16941	0.199224	0.272122
316	0.210778	0.268119	0.197318		316	0.16875	0.198807	0.271706
317	0.209769	0.269327	0.197388		317	0.171595	0.19807	0.271104
318	0.209929	0.267899	0.198021		318	0.172529	0.199838	0.267722
319	0.208446	0.265249	0.19852		319	0.174773	0.198805	0.269871
320	0.210523	0.262688	0.19731		320	0.174753	0.198738	0.27156
321	0.210255	0.258889	0.200156		321	0.176195	0.197119	0.270728
322	0.210693	0.254853	0.202666		322	0.173748	0.19558	0.270791
323	0.211595	0.249142	0.202125		323	0.171511	0.194645	0.269633
324	0.214538	0.248352	0.200973		324	0.172671	0.192494	0.267795
325	0.214848	0.247968	0.204501		325	0.172114	0.191289	0.265714
326	0.217727	0.245272	0.201094		326	0.172648	0.189733	0.263914
327	0.218166	0.241114	0.198602		327	0.175504	0.185593	0.260449
328	0.216741	0.240939	0.196865		328	0.178708	0.183096	0.257775
329	0.214045	0.235823	0.197197		329	0.180849	0.184257	0.256195
330	0.214497	0.230391	0.194859		330	0.184435	0.181287	0.255061
331	0.214003	0.228146	0.195951		331	0.18958	0.183731	0.253131
332	0.213771	0.227664	0.196899		332	0.191869	0.184718	0.25449
333	0.215732	0.224237	0.198338		333	0.19423	0.183855	0.25888
334	0.216483	0.223397	0.199275		334	0.193499	0.182318	0.25971
335	0.214633	0.223466	0.197964		335	0.1946	0.183858	0.258751
336	0.213529	0.222795	0.19793		336	0.191152	0.180378	0.25971
337	0.214563	0.220273	0.197785		337	0.189266	0.180462	0.260264
338	0.215252	0.216585	0.19721		338	0.190756	0.180925	0.255272
339	0.21623	0.212774	0.198958		339	0.192781	0.181238	0.252146
340	0.217898	0.21048	0.200316		340	0.193733	0.179977	0.252795
341	0.219135	0.207071	0.199998		341	0.193164	0.179533	0.254168
342	0.21957	0.203787	0.200006		342	0.194844	0.179706	0.253232
343	0.220089	0.202946	0.20414		343	0.194625	0.179061	0.253402
344	0.219783	0.203822	0.203007		344	0.196173	0.179174	0.255482
345	0.218771	0.199395	0.201402		345	0.195486	0.178718	0.254423
346	0.219562	0.198149	0.201314		346	0.198506	0.180062	0.252461
347	0.220324	0.196309	0.200935		347	0.200628	0.178631	0.249122
348	0.220803	0.196225	0.198044		348	0.202472	0.17887	0.247697
349	0.221289	0.192472	0.19646		349	0.204325	0.178129	0.243846
350	0.221809	0.190562	0.196866		350	0.206195	0.177083	0.241602
351	0.221292	0.189853	0.198015		351	0.208467	0.177309	0.2379
352	0.223534	0.190533	0.199752		352	0.207656	0.177265	0.239782
353	0.225365	0.186326	0.19969		353	0.206541	0.176782	0.238515
354	0.22741	0.185576	0.201273		354	0.20565	0.175891	0.239812
355	0.229702	0.185043	0.206185		355	0.203425	0.17666	0.239958
356	0.23063	0.18178	0.207458		356	0.200415	0.175333	0.242261
357	0.229838	0.178953	0.207754		357	0.203558	0.175441	0.239
358	0.228856	0.180143	0.20797		358	0.204286	0.175089	0.24015
359	0.226926	0.179805	0.209806		359	0.200673	0.175321	0.239319
360	0.228069	0.179823	0.206817		360	0.202823	0.175464	0.236379
361	0.229675	0.179864	0.207065		361	0.203438	0.174569	0.236192
362	0.228218	0.181508	0.209515		362	0.202456	0.176084	0.238124
363	0.228724	0.181999	0.210981		363	0.203421	0.176492	0.237542
364	0.229843	0.180955	0.21118		364	0.206128	0.176976	0.237948
365	0.22925	0.17993	0.214652		365	0.206154	0.177458	0.240301
366	0.228888	0.178198	0.215255		366	0.205787	0.17759	0.236738
367	0.232933	0.175671	0.214397		367	0.204598	0.175811	0.235013
368	0.233608	0.17507	0.214812		368	0.203134	0.175244	0.234455
369	0.234545	0.173348	0.214199		369	0.201597	0.174628	0.233652
370	0.235447	0.174281	0.212436		370	0.203338	0.174046	0.231467
371	0.237449	0.175504	0.21409		371	0.203854	0.17366	0.23218
372	0.235741	0.176768	0.211982		372	0.204741	0.174029	0.232389
373	0.23905	0.176115	0.213398		373	0.203343	0.1747	0.230837
374	0.241988	0.176884	0.214794		374	0.205577	0.17453	0.229837
375	0.243754	0.175152	0.214718		375	0.206102	0.17343	0.23051
376	0.245014	0.174269	0.212854		376	0.210265	0.17539	0.230544
377	0.248144	0.172602	0.215556		377	0.210503	0.174212	0.231516
378	0.245615	0.17097	0.214575		378	0.212595	0.17328	0.232663
379	0.246263	0.17034	0.214594		379	0.21133	0.172211	0.234045
380	0.245702	0.170743	0.216902		380	0.210224	0.17129	0.235791
381	0.244845	0.170898	0.219242		381	0.207608	0.169232	0.2369
382	0.246851	0.171624	0.221799		382	0.20652	0.168925	0.237132
383	0.249661	0.172556	0.223734		383	0.205586	0.168054	0.236398
384	0.250268	0.173256	0.226773		384	0.210423	0.168529	0.236335
385	0.251441	0.171069	0.228275		385	0.213804	0.171784	0.23652
386	0.255599	0.170621	0.227603		386	0.212756	0.172232	0.235255
387	0.254371	0.170035	0.228511		387	0.212597	0.172859	0.236704
388	0.255426	0.168286	0.228859		388	0.212431	0.174688	0.238958
389	0.256606	0.166601	0.225503		389	0.213147	0.175314	0.240512
390	0.261853	0.168479	0.224958		390	0.209405	0.173312	0.240103
391	0.260347	0.167939	0.226332		391	0.211665	0.174481	0.238975
392	0.265535	0.164852	0.225234		392	0.213116	0.177139	0.239083
393	0.266885	0.164789	0.225729		393	0.215168	0.179189	0.23661
394	0.267836	0.167063	0.229033		394	0.210248	0.182574	0.232561
395	0.265583	0.167329	0.229893		395	0.211838	0.186818	0.231534
396	0.270885	0.168642	0.231938		396	0.210698	0.190948	0.235069
397	0.26957	0.171387	0.233946		397	0.213714	0.194188	0.233035
398	0.271006	0.173124	0.235997		398	0.215365	0.198413	0.233849
399	0.276865	0.170571	0.240477		399	0.219658	0.202565	0.23451
400	0.281904	0.170351	0.24045		400	0.218921	0.206671	0.233742
401	0.282448	0.170192	0.242615		401	0.22131	0.210286	0.228862
402	0.287594	0.171449	0.245529		402	0.217589	0.215655	0.228113
403	0.291634	0.170237	0.249116		403	0.216954	0.220055	0.229035
404	0.290187	0.169799	0.250457		404	0.214639	0.222585	0.230263
405	0.290763	0.169031	0.255903		405	0.214149	0.227388	0.231697
406	0.292054	0.169874	0.257139		406	0.211195	0.230726	0.235255
407	0.292169	0.168261	0.260696		407	0.209061	0.22964	0.234684
408	0.297946	0.168763	0.263587		408	0.20788	0.227802	0.234144
409	0.309769	0.169757	0.264414		409	0.205941	0.229817	0.233698
410	0.320194	0.170217	0.270879		410	0.205346	0.22924	0.233415
411	0.330238	0.167408	0.281107		411	0.20534	0.230656	0.231763
412	0.341233	0.168036	0.292294		412	0.205664	0.235319	0.230444
413	0.350756	0.167102	0.301871		413	0.20285	0.239532	0.230296
414	0.353197	0.166906	0.312644		414	0.202203	0.241628	0.227964
415	0.353818	0.16635	0.319055		415	0.199765	0.243972	0.225514
416	0.356571	0.16711	0.32233		416	0.199818	0.246821	0.223574
417	0.354165	0.166186	0.322847		417	0.20125	0.248548	0.223573
418	0.351358	0.167534	0.322383		418	0.200288	0.250438	0.219904
419	0.350599	0.166316	0.323875		419	0.20041	0.250913	0.219551
420	0.351282	0.164392	0.322747		420	0.201122	0.249278	0.219895
421	0.347387	0.165117	0.325199		421	0.199415	0.24578	0.221256
422	0.343562	0.163461	0.321573		422	0.199921	0.242713	0.221204
423	0.339414	0.161541	0.320923		423	0.201462	0.238871	0.222064
424	0.333373	0.160894	0.320081		424	0.201252	0.236979	0.22218
425	0.325385	0.163696	0.317		425	0.200552	0.238656	0.220485
426	0.318784	0.164668	0.313797		426	0.200373	0.24116	0.219927
427	0.317285	0.169548	0.313465		427	0.195894	0.243298	0.219234
428	0.312195	0.17315	0.31315		428	0.194769	0.246746	0.218718
429	0.309665	0.178081	0.309087		429	0.192018	0.249281	0.221066
430	0.30498	0.179894	0.310042		430	0.190479	0.247873	0.222856
431	0.301019	0.184825	0.30875		431	0.189163	0.248539	0.223131
432	0.294569	0.185785	0.308181		432	0.189693	0.246335	0.221628
433	0.288246	0.187695	0.302192		433	0.187117	0.244259	0.223233
434	0.281067	0.189544	0.299431		434	0.188461	0.240179	0.220881
435	0.27827	0.190321	0.293656		435	0.188391	0.23736	0.222338
436	0.272364	0.188207	0.288314		436	0.186015	0.230727	0.222144
437	0.267867	0.190713	0.284762		437	0.184726	0.229776	0.22385
438	0.265656	0.192669	0.282781		438	0.183394	0.225508	0.224602
439	0.260776	0.193266	0.279902		439	0.181846	0.224325	0.225326
440	0.257302	0.195259	0.277053		440	0.182324	0.222947	0.223144
441	0.255102	0.198284	0.269658		441	0.183198	0.221224	0.223188
442	0.25065	0.197538	0.261174		442	0.183635	0.216565	0.223429
443	0.245192	0.197583	0.257579		443	0.185494	0.214136	0.222902
444	0.244373	0.200579	0.25231		444	0.184837	0.211145	0.223465
445	0.242797	0.201187	0.244311		445	0.183761	0.208573	0.222742
446	0.2422	0.199977	0.243865		446	0.183469	0.206338	0.221346
447	0.243075	0.201886	0.242823		447	0.184946	0.204159	0.222277
448	0.243251	0.204021	0.238462		448	0.18435	0.199797	0.222843
449	0.242653	0.202815	0.236921		449	0.1827	0.194291	0.222913
450	0.239645	0.204761	0.240198		450	0.182786	0.190605	0.222711
451	0.239589	0.206725	0.238635		451	0.182788	0.187846	0.222668
452	0.238879	0.204875	0.239475		452	0.182313	0.185486	0.222501
453	0.237905	0.202761	0.238013		453	0.181556	0.185896	0.2232
454	0.23716	0.202554	0.236977		454	0.183955	0.18616	0.225137
455	0.238201	0.198581	0.234502		455	0.183795	0.185063	0.224098
456	0.236749	0.1961	0.23161		456	0.183785	0.185434	0.227003
457	0.236627	0.19756	0.225265		457	0.181879	0.184717	0.22656
458	0.238604	0.200622	0.223608		458	0.183123	0.183066	0.226315
459	0.239623	0.202313	0.219466		459	0.182364	0.183292	0.223381
460	0.23845	0.210634	0.216396		460	0.180347	0.182209	0.226622
461	0.238096	0.218038	0.216468		461	0.180052	0.178424	0.226362
462	0.238678	0.221921	0.215962		462	0.18125	0.175779	0.230571
463	0.235432	0.226473	0.215666		463	0.181192	0.176785	0.23125
464	0.232771	0.230685	0.214547		464	0.17858	0.174529	0.232504
465	0.235532	0.233919	0.212893		465	0.179859	0.17459	0.23328
466	0.234578	0.237204	0.209359		466	0.178294	0.175653	0.232994
467	0.232912	0.239937	0.210269		467	0.176951	0.176988	0.229393
468	0.233498	0.240639	0.209777		468	0.178143	0.175421	0.228446
469	0.234515	0.243808	0.211844		469	0.179944	0.175397	0.230223
470	0.232908	0.244176	0.214014		470	0.181067	0.174943	0.228894
471	0.233399	0.244696	0.21239		471	0.182692	0.176086	0.231712
472	0.23377	0.247177	0.210865		472	0.183121	0.177211	0.23298
473	0.233339	0.250237	0.209447		473	0.182474	0.178333	0.236307
474	0.231924	0.254926	0.206113		474	0.180654	0.180757	0.236909
475	0.230721	0.260187	0.205771		475	0.181554	0.182953	0.239054
476	0.230858	0.267696	0.205718		476	0.183132	0.182872	0.236934
477	0.229404	0.274637	0.206717		477	0.183514	0.185218	0.239464
478	0.22922	0.282931	0.206054		478	0.181535	0.187447	0.240285
479	0.230614	0.290264	0.206285		479	0.184328	0.190013	0.24054
480	0.231585	0.299401	0.20395		480	0.183537	0.191805	0.242313
481	0.231281	0.304108	0.202854		481	0.184744	0.193914	0.245949
482	0.233905	0.308415	0.200707		482	0.184207	0.19291	0.246579
483	0.235143	0.31344	0.198363		483	0.186891	0.191223	0.246886
484	0.233868	0.316768	0.199196		484	0.189102	0.19078	0.249357
485	0.231574	0.317448	0.19958		485	0.187979	0.189433	0.249601
486	0.231275	0.318971	0.200142		486	0.188782	0.189389	0.247725
487	0.226867	0.320584	0.198666		487	0.189515	0.18924	0.245846
488	0.226512	0.319826	0.203283		488	0.186005	0.189804	0.245472
489	0.224885	0.32074	0.199776		489	0.184355	0.187856	0.24413
490	0.224211	0.318216	0.198722		490	0.185057	0.189106	0.245212
491	0.223498	0.319804	0.200118		491	0.181561	0.190163	0.244866
492	0.223866	0.316848	0.19973		492	0.180601	0.190805	0.245998
493	0.221895	0.31569	0.19585		493	0.183039	0.193143	0.247018
494	0.221618	0.314263	0.19635		494	0.181842	0.192413	0.246852
495	0.221027	0.314557	0.197012		495	0.181144	0.191286	0.247163
496	0.221001	0.310002	0.197063		496	0.179057	0.188576	0.249177
497	0.219788	0.311418	0.197823		497	0.178287	0.188503	0.250781
498	0.221215	0.31106	0.198956		498	0.17846	0.18459	0.250346
499	0.222355	0.310206	0.20147		499	0.178168	0.184539	0.252871
500	0.223774	0.30825	0.199604		500	0.179657	0.182557	0.254744
501	0.222811	0.308945	0.196907		501	0.181517	0.18144	0.256939
502	0.223139	0.308301	0.196976		502	0.18456	0.178342	0.255996
503	0.220136	0.306855	0.195842		503	0.181654	0.178788	0.254413
504	0.21874	0.306802	0.195891		504	0.182509	0.178338	0.252409
505	0.218155	0.309951	0.195778		505	0.182536	0.177852	0.250239
506	0.217921	0.31124	0.19525		506	0.182859	0.176198	0.248866
507	0.218591	0.308546	0.197348		507	0.17959	0.176252	0.249476
508	0.219542	0.310002	0.197105		508	0.180304	0.174955	0.253353
509	0.220109	0.307362	0.193452		509	0.178371	0.17601	0.253698
510	0.220627	0.306571	0.193488		510	0.17649	0.17604	0.254323
511	0.221487	0.304276	0.196949		511	0.17462	0.178791	0.251471
512	0.223447	0.305374	0.195787		512	0.17427	0.180231	0.252535
513	0.224699	0.30043	0.196161		513	0.174209	0.181229	0.248082
514	0.227301	0.30048	0.197383		514	0.178229	0.182299	0.247136
515	0.227749	0.296335	0.19815		515	0.1779	0.183379	0.244145
516	0.226538	0.293256	0.195714		516	0.180296	0.182702	0.242972
517	0.225787	0.290288	0.195198		517	0.184008	0.184213	0.240094
518	0.225463	0.286092	0.195735		518	0.186141	0.186446	0.238381
519	0.225364	0.281679	0.19761		519	0.183532	0.186911	0.235628
520	0.225005	0.28127	0.194614		520	0.183548	0.189622	0.235695
521	0.226195	0.278123	0.195289		521	0.183995	0.193475	0.236198
522	0.226058	0.27749	0.194174		522	0.182761	0.195013	0.233374
523	0.226789	0.280892	0.192535		523	0.182201	0.194748	0.232521
524	0.226333	0.280315	0.19135		524	0.185631	0.194036	0.233534
525	0.226508	0.276191	0.192036		525	0.188313	0.192675	0.234441
526	0.227922	0.278125	0.19136		526	0.186108	0.189406	0.235273
527	0.229344	0.27817	0.1919		527	0.187568	0.188511	0.235727
528	0.229039	0.278739	0.193075		528	0.188637	0.188435	0.237658
529	0.228229	0.278986	0.1923		529	0.186795	0.188081	0.238461
530	0.227928	0.282382	0.19405		530	0.185786	0.187985	0.236893
531	0.226699	0.278499	0.195655		531	0.187578	0.188852	0.237842
532	0.226099	0.277076	0.197522		532	0.185675	0.188366	0.239556
533	0.225139	0.272066	0.195768		533	0.185093	0.190318	0.240783
534	0.226684	0.27084	0.195301		534	0.184514	0.189474	0.239013
535	0.228832	0.266922	0.196272		535	0.184767	0.191251	0.240485
536	0.230898	0.26823	0.195483		536	0.185255	0.192202	0.23948
537	0.229621	0.266276	0.193284		537	0.185652	0.195981	0.240031
538	0.231936	0.266996	0.191533		538	0.185043	0.194872	0.238598
539	0.232091	0.265406	0.194314		539	0.184637	0.19755	0.240135
540	0.230988	0.268325	0.196404		540	0.18507	0.196565	0.236059
541	0.230491	0.267749	0.196093		541	0.186104	0.19715	0.23592
542	0.233183	0.269317	0.197107		542	0.184963	0.192789	0.235547
543	0.235248	0.270493	0.201589		543	0.185938	0.19218	0.233266
544	0.235637	0.26984	0.202604		544	0.183953	0.192803	0.232358
545	0.236299	0.263695	0.201389		545	0.184708	0.193218	0.234911
546	0.236734	0.263243	0.202959		546	0.185392	0.193423	0.233672
547	0.235199	0.260834	0.203032		547	0.186917	0.194218	0.231315
548	0.232092	0.258446	0.202682		548	0.186928	0.195078	0.231128
549	0.229647	0.257649	0.20063		549	0.188176	0.191158	0.228522
550	0.229503	0.255453	0.200073		550	0.18597	0.190164	0.227085
551	0.228939	0.254231	0.20144		551	0.183557	0.188802	0.225574
552	0.230462	0.251797	0.201213		552	0.18364	0.186975	0.223542
553	0.230908	0.250144	0.202045		553	0.183067	0.185992	0.222964
554	0.233848	0.24868	0.202606		554	0.183969	0.186213	0.224845
555	0.235282	0.250044	0.206176		555	0.185506	0.185938	0.223576
556	0.236945	0.24853	0.205789		556	0.187519	0.186348	0.221744
557	0.238575	0.245677	0.205587		557	0.187794	0.187983	0.22231
558	0.241977	0.242317	0.204759		558	0.188441	0.18832	0.224527
559	0.242172	0.240893	0.205142		559	0.187542	0.18919	0.22413
560	0.245791	0.239582	0.199906		560	0.187393	0.188548	0.224553
561	0.246675	0.233946	0.200851		561	0.186611	0.188551	0.228405
562	0.249125	0.23145	0.200914		562	0.186006	0.187996	0.228331
563	0.251779	0.231306	0.201041		563	0.183896	0.186708	0.225498
564	0.252956	0.228904	0.199957		564	0.185789	0.185396	0.224668
565	0.253536	0.22702	0.202063		565	0.18572	0.185515	0.225546
566	0.256846	0.230468	0.199419		566	0.183876	0.183835	0.224396
567	0.25843	0.234701	0.199846		567	0.183489	0.184004	0.22565
568	0.263431	0.237026	0.199347		568	0.183833	0.186204	0.226305
569	0.272464	0.240696	0.198993		569	0.180873	0.185835	0.225177
570	0.279145	0.241675	0.198076		570	0.180962	0.186215	0.223726
571	0.288124	0.241341	0.20057		571	0.182359	0.186208	0.224191
572	0.294233	0.243082	0.200364		572	0.182819	0.183708	0.225126
573	0.29881	0.241035	0.201367		573	0.185487	0.179239	0.226791
574	0.305278	0.240967	0.202551		574	0.18796	0.182122	0.228739
575	0.315905	0.242112	0.20469		575	0.187395	0.181939	0.229695
576	0.327285	0.244578	0.20382		576	0.189063	0.181991	0.23176
577	0.342182	0.242387	0.203256		577	0.190095	0.183681	0.233523
578	0.355211	0.244132	0.204083		578	0.187891	0.186919	0.234501
579	0.364289	0.240688	0.204258		579	0.191213	0.184724	0.237835
580	0.365673	0.237903	0.202847		580	0.190298	0.183581	0.24015
581	0.365462	0.235469	0.204383		581	0.188379	0.184559	0.241257
582	0.362268	0.237393	0.205749		582	0.187726	0.183006	0.241803
583	0.358387	0.237396	0.206526		583	0.188732	0.180718	0.242659
584	0.353379	0.238473	0.20524		584	0.187794	0.179603	0.242167
585	0.353612	0.241704	0.206028		585	0.190242	0.180966	0.243782
586	0.352932	0.240519	0.206222		586	0.191208	0.179309	0.243497
587	0.349159	0.240453	0.206789		587	0.19468	0.178457	0.244358
588	0.345037	0.241807	0.205319		588	0.196694	0.179615	0.246421
589	0.339943	0.243251	0.207636		589	0.195626	0.179911	0.246443
590	0.331853	0.241022	0.208682		590	0.196647	0.178987	0.245899
591	0.321689	0.24306	0.206435		591	0.199601	0.178891	0.244747
592	0.314331	0.241183	0.205544		592	0.198324	0.18177	0.243647
593	0.306838	0.239838	0.205892		593	0.198728	0.180353	0.243406
594	0.298996	0.239278	0.20442		594	0.198538	0.181015	0.244853
595	0.2904	0.240479	0.204483		595	0.19816	0.182143	0.244151
596	0.284082	0.244697	0.204054		596	0.19701	0.182122	0.244812
597	0.279989	0.244417	0.206007		597	0.197817	0.180851	0.246357
598	0.273198	0.243657	0.205674		598	0.198303	0.182186	0.24618
599	0.270495	0.245148	0.208897		599	0.200541	0.182272	0.243945
600	0.265446	0.246584	0.206306		600	0.202333	0.181918	0.244577

## Sheet: graph
Figure 1B
Fluctuation-positive cells (%)					Fluctuation amplitude(ΔF340/F380)
Wild-type	Npr2fl/fl, Col2a1-Cre-/-	Npr2fl/fl, Col2a1-Cre+/-			Wild-type	Npr2fl/fl, Col2a1-Cre-/-	Npr2fl/fl, Col2a1-Cre+/-
93.3333	86.6667	53.3333			0.0741268	0.0736358	0.0628658
63.3333	76.6667	73.3333			0.0529906	0.0757429	0.0588543
83.3333	63.3333	46.6667			0.0871875	0.0762349	0.0616507
63.3333	83.3333	33.3333			0.0691857	0.0757482	0.0589708
63.3333					0.061435
60					0.0778641
73.3333					0.0684444
86.6667					0.0715833
80					0.0734632
90					0.0716004
76.6667					0.0828356
