# Supplementary material for: C-type natriuretic peptide facilitates autonomic Ca2+ entry in growth plate chondrocytes for stimulating bone growth
Source: eLife. 2022 Mar 15;11:e71931. doi: 10.7554/eLife.71931 (PMC8923661; doi:10.7554/eLife.71931)
Supplement: Figure 2—source data 1. [file elife-71931-fig2-data1.xlsx]

## Sheet: trace
Figure 2A
Vehicle					8-pCPT-cGMP (100 mM)
Times (s)	Cell1	Cell2	Cell3		Times (s)	Cell1	Cell2	Cell3
0	0.189801	0.189333	0.189908		0	0.203703	0.22646	0.241427
1	0.190176	0.189566	0.190903		1	0.203676	0.224525	0.242803
2	0.189827	0.189849	0.189392		2	0.203813	0.223423	0.242887
3	0.18975	0.190685	0.189508		3	0.206374	0.222872	0.242391
4	0.189543	0.193266	0.190339		4	0.208205	0.221857	0.241978
5	0.191111	0.193114	0.188286		5	0.208022	0.222552	0.240733
6	0.190507	0.195035	0.187369		6	0.209321	0.224451	0.238692
7	0.191742	0.195058	0.188415		7	0.208987	0.22634	0.238017
8	0.189769	0.198884	0.187354		8	0.207791	0.22681	0.236703
9	0.190778	0.198474	0.18884		9	0.205763	0.228092	0.236971
10	0.188562	0.201438	0.190423		10	0.205594	0.227892	0.238479
11	0.189207	0.202523	0.190954		11	0.203704	0.226208	0.239219
12	0.18722	0.203008	0.190791		12	0.207413	0.225796	0.241627
13	0.188551	0.199341	0.191139		13	0.208109	0.226564	0.243332
14	0.188554	0.19868	0.192427		14	0.212089	0.227845	0.245142
15	0.189995	0.197631	0.192558		15	0.2129	0.230697	0.245312
16	0.188268	0.197202	0.19234		16	0.214048	0.233726	0.245283
17	0.189859	0.196679	0.192636		17	0.211697	0.235543	0.243867
18	0.189047	0.196366	0.193415		18	0.210671	0.237387	0.242316
19	0.188797	0.195543	0.192751		19	0.209006	0.237806	0.239784
20	0.18915	0.194287	0.194382		20	0.208193	0.238369	0.239366
21	0.1914	0.193083	0.196804		21	0.210829	0.239725	0.239106
22	0.191343	0.194778	0.198483		22	0.212689	0.240138	0.238487
23	0.190471	0.193712	0.198861		23	0.213158	0.240563	0.241362
24	0.190576	0.194892	0.200868		24	0.212329	0.241517	0.241976
25	0.188787	0.194701	0.201283		25	0.214822	0.242239	0.243717
26	0.188798	0.193347	0.200933		26	0.212082	0.242423	0.243785
27	0.188867	0.191266	0.199476		27	0.207899	0.243452	0.245979
28	0.192329	0.193069	0.19999		28	0.209388	0.245224	0.247002
29	0.194291	0.189824	0.199542		29	0.211138	0.246231	0.251442
30	0.194743	0.187498	0.199169		30	0.210218	0.247807	0.25403
31	0.193973	0.187838	0.200517		31	0.211055	0.248668	0.259163
32	0.193089	0.187092	0.202922		32	0.212144	0.250685	0.26155
33	0.191115	0.183924	0.204419		33	0.209679	0.251138	0.264839
34	0.188973	0.18573	0.204713		34	0.207067	0.25293	0.268342
35	0.190279	0.186905	0.207204		35	0.207062	0.253555	0.272248
36	0.190313	0.185988	0.209133		36	0.206151	0.254971	0.276725
37	0.190311	0.188191	0.211313		37	0.208069	0.255973	0.283641
38	0.189102	0.190465	0.213367		38	0.206549	0.25581	0.288887
39	0.189642	0.191319	0.217064		39	0.206501	0.256498	0.294755
40	0.18915	0.1931	0.216888		40	0.203688	0.256732	0.300538
41	0.189304	0.191769	0.218304		41	0.203275	0.257497	0.303078
42	0.190335	0.188998	0.222551		42	0.200711	0.258001	0.302905
43	0.192447	0.18767	0.224279		43	0.203952	0.258709	0.301236
44	0.192525	0.186716	0.225285		44	0.205355	0.257172	0.298258
45	0.191283	0.185395	0.228396		45	0.206856	0.256857	0.294633
46	0.191561	0.186718	0.228131		46	0.206358	0.256448	0.294265
47	0.188886	0.186589	0.227562		47	0.2047	0.256402	0.292779
48	0.187169	0.187292	0.228937		48	0.201251	0.257318	0.29344
49	0.186848	0.188283	0.228899		49	0.20036	0.258285	0.292812
50	0.186922	0.187154	0.231221		50	0.199415	0.259132	0.292407
51	0.188796	0.184496	0.231962		51	0.201725	0.260194	0.289847
52	0.189558	0.182459	0.232258		52	0.205228	0.262038	0.289758
53	0.1907	0.178934	0.230787		53	0.208196	0.263676	0.287613
54	0.191696	0.175418	0.229807		54	0.210466	0.264948	0.286613
55	0.191756	0.174701	0.228745		55	0.210039	0.266895	0.285559
56	0.189862	0.176948	0.230457		56	0.209069	0.267848	0.285629
57	0.190729	0.178953	0.232089		57	0.20922	0.268004	0.283779
58	0.189827	0.183382	0.233656		58	0.20932	0.268556	0.283946
59	0.188489	0.185478	0.233591		59	0.208636	0.270433	0.283113
60	0.189724	0.186341	0.232431		60	0.210797	0.269682	0.282608
61	0.190889	0.186561	0.230703		61	0.210143	0.270306	0.28276
62	0.1907	0.187072	0.227855		62	0.211323	0.270161	0.282106
63	0.190277	0.183774	0.227106		63	0.210385	0.269167	0.282914
64	0.189457	0.183649	0.227278		64	0.210124	0.267371	0.283368
65	0.188268	0.182643	0.226336		65	0.210343	0.266659	0.283258
66	0.18585	0.182808	0.226714		66	0.210357	0.266582	0.281364
67	0.186063	0.181502	0.224441		67	0.207701	0.266687	0.281016
68	0.186003	0.182348	0.22174		68	0.206889	0.266737	0.278198
69	0.18773	0.181611	0.2211		69	0.206466	0.26849	0.276439
70	0.188305	0.181988	0.220874		70	0.207343	0.270841	0.274662
71	0.188253	0.180449	0.219825		71	0.208613	0.271965	0.274699
72	0.186925	0.180229	0.222499		72	0.208689	0.273991	0.275817
73	0.187724	0.178242	0.223457		73	0.21055	0.279679	0.275274
74	0.188359	0.178225	0.223362		74	0.210126	0.284425	0.275898
75	0.188138	0.178057	0.223203		75	0.209597	0.288569	0.276816
76	0.187185	0.178339	0.222781		76	0.210243	0.293711	0.276163
77	0.188525	0.179879	0.220742		77	0.212275	0.299815	0.274141
78	0.186522	0.180962	0.219257		78	0.213694	0.301969	0.274391
79	0.186516	0.181499	0.217569		79	0.217178	0.304393	0.27481
80	0.185702	0.182806	0.216367		80	0.21839	0.308566	0.274089
81	0.186513	0.183716	0.214773		81	0.221512	0.313217	0.271797
82	0.185836	0.185071	0.213496		82	0.222332	0.315578	0.273261
83	0.185306	0.185513	0.214197		83	0.221478	0.318344	0.274025
84	0.183287	0.184788	0.215038		84	0.222556	0.323164	0.274626
85	0.184924	0.186626	0.215227		85	0.22591	0.326188	0.275972
86	0.184834	0.18675	0.21541		86	0.223839	0.331154	0.281223
87	0.184841	0.184079	0.217248		87	0.224299	0.336012	0.281562
88	0.185651	0.186314	0.215128		88	0.226955	0.34005	0.281525
89	0.18669	0.187736	0.213845		89	0.225934	0.340094	0.281067
90	0.186191	0.184757	0.213237		90	0.223344	0.339932	0.279356
91	0.186341	0.184491	0.212499		91	0.228053	0.33687	0.275839
92	0.186204	0.183899	0.209936		92	0.23194	0.335004	0.274501
93	0.186447	0.182298	0.210461		93	0.230868	0.333399	0.272481
94	0.185639	0.180586	0.208945		94	0.234335	0.334823	0.271083
95	0.184735	0.181147	0.208143		95	0.239841	0.335788	0.27166
96	0.184814	0.179817	0.208177		96	0.238915	0.334108	0.271784
97	0.184332	0.180996	0.20645		97	0.239672	0.333954	0.271244
98	0.185206	0.178889	0.20745		98	0.245899	0.334434	0.272467
99	0.185232	0.178192	0.209094		99	0.248507	0.332764	0.274212
100	0.184422	0.176628	0.211677		100	0.244745	0.330144	0.273987
101	0.181809	0.176586	0.211296		101	0.245651	0.331385	0.273945
102	0.181929	0.175372	0.213816		102	0.247627	0.33008	0.273944
103	0.180839	0.177474	0.213568		103	0.254922	0.3297	0.273404
104	0.180892	0.176428	0.213478		104	0.256842	0.330175	0.272604
105	0.182377	0.17761	0.21165		105	0.262673	0.331489	0.273633
106	0.186039	0.176405	0.2145		106	0.268746	0.331451	0.272534
107	0.186884	0.17498	0.2162		107	0.271934	0.331163	0.273306
108	0.187163	0.172692	0.216646		108	0.271372	0.329096	0.273612
109	0.187626	0.174622	0.21633		109	0.274041	0.326741	0.272696
110	0.188842	0.173975	0.217294		110	0.276074	0.326999	0.271361
111	0.189027	0.172618	0.216433		111	0.276202	0.329621	0.272093
112	0.189378	0.174557	0.217742		112	0.275276	0.331503	0.270192
113	0.190623	0.17387	0.219699		113	0.273466	0.335515	0.26997
114	0.191902	0.171469	0.223312		114	0.273821	0.340231	0.269759
115	0.191219	0.171824	0.22558		115	0.276998	0.345558	0.269365
116	0.191417	0.172162	0.225831		116	0.275973	0.348743	0.269107
117	0.191901	0.170301	0.225332		117	0.279329	0.351725	0.270368
118	0.191957	0.171343	0.224866		118	0.280752	0.351052	0.267139
119	0.191812	0.17124	0.224384		119	0.281924	0.350809	0.267295
120	0.191258	0.170632	0.226035		120	0.279824	0.348992	0.266306
121	0.188862	0.173337	0.227245		121	0.28445	0.345346	0.265067
122	0.189703	0.174395	0.228183		122	0.284509	0.343093	0.264223
123	0.188977	0.175008	0.228947		123	0.282634	0.343977	0.266503
124	0.188749	0.176599	0.230186		124	0.281238	0.342163	0.265298
125	0.188548	0.176727	0.227424		125	0.279301	0.339547	0.265404
126	0.188739	0.175974	0.22696		126	0.277463	0.336864	0.265419
127	0.188219	0.177031	0.226517		127	0.276633	0.333238	0.263698
128	0.187825	0.176749	0.227358		128	0.279306	0.329092	0.263806
129	0.189083	0.174623	0.224819		129	0.275759	0.325718	0.264066
130	0.190996	0.173827	0.225761		130	0.276252	0.32194	0.264171
131	0.195902	0.172914	0.225627		131	0.276093	0.318919	0.264999
132	0.198467	0.170379	0.226795		132	0.273733	0.318163	0.267533
133	0.201716	0.17136	0.227272		133	0.268375	0.314039	0.268929
134	0.202798	0.173969	0.228762		134	0.268568	0.310953	0.269901
135	0.205219	0.176553	0.229373		135	0.267288	0.308669	0.272286
136	0.205165	0.179638	0.231057		136	0.268101	0.306278	0.275641
137	0.20468	0.183423	0.230873		137	0.269935	0.301556	0.277865
138	0.205961	0.18363	0.23138		138	0.266832	0.300754	0.279045
139	0.206905	0.185229	0.233616		139	0.266236	0.298581	0.282386
140	0.206661	0.186981	0.235522		140	0.265724	0.296919	0.283397
141	0.207906	0.18736	0.236775		141	0.261546	0.29484	0.281697
142	0.20854	0.185726	0.238138		142	0.256857	0.294838	0.2828
143	0.208816	0.186514	0.239511		143	0.255501	0.290715	0.283837
144	0.206777	0.185729	0.237905		144	0.255937	0.289562	0.279469
145	0.207055	0.184272	0.2376		145	0.254404	0.287319	0.27489
146	0.204442	0.1819	0.236554		146	0.250583	0.286558	0.273883
147	0.201035	0.183649	0.236837		147	0.251078	0.284202	0.270415
148	0.198263	0.182987	0.233763		148	0.250717	0.286229	0.268344
149	0.197845	0.182193	0.236694		149	0.249563	0.28579	0.269314
150	0.195949	0.180157	0.235062		150	0.248121	0.284604	0.271773
151	0.196321	0.180433	0.235555		151	0.247465	0.283048	0.27459
152	0.197716	0.178878	0.234719		152	0.245563	0.283111	0.277735
153	0.197978	0.178133	0.238166		153	0.243845	0.283071	0.280898
154	0.197652	0.177419	0.238206		154	0.240143	0.284639	0.284144
155	0.198774	0.176727	0.242424		155	0.234713	0.285927	0.288642
156	0.198313	0.175865	0.242998		156	0.232436	0.287495	0.29132
157	0.198896	0.175584	0.243774		157	0.229721	0.287844	0.294964
158	0.198509	0.174665	0.244044		158	0.228074	0.289297	0.296414
159	0.199163	0.174846	0.243475		159	0.225964	0.290111	0.298518
160	0.197161	0.174485	0.241414		160	0.230709	0.292039	0.29772
161	0.19654	0.174708	0.240966		161	0.22973	0.294814	0.299883
162	0.195396	0.17216	0.240037		162	0.229786	0.29587	0.297388
163	0.196929	0.17354	0.236953		163	0.230738	0.296129	0.296503
164	0.197281	0.173907	0.233012		164	0.229305	0.294829	0.297661
165	0.199693	0.174756	0.232234		165	0.225854	0.295988	0.298672
166	0.200802	0.174326	0.229804		166	0.225928	0.293607	0.29705
167	0.202494	0.175927	0.22767		167	0.223794	0.293471	0.298689
168	0.201664	0.1744	0.225969		168	0.222533	0.291324	0.299558
169	0.203393	0.173909	0.225516		169	0.221255	0.289867	0.300912
170	0.20254	0.172731	0.222633		170	0.217569	0.285731	0.303219
171	0.20325	0.172376	0.220882		171	0.215191	0.283888	0.306307
172	0.201488	0.172068	0.219336		172	0.216453	0.281115	0.30691
173	0.200674	0.171428	0.217812		173	0.213684	0.279012	0.309208
174	0.200767	0.170827	0.215946		174	0.213048	0.277279	0.3112
175	0.199682	0.172048	0.214173		175	0.212628	0.276881	0.314454
176	0.19806	0.17177	0.21287		176	0.21441	0.276491	0.31697
177	0.199474	0.17347	0.210138		177	0.211435	0.276267	0.321101
178	0.201545	0.172452	0.207327		178	0.215814	0.27669	0.324514
179	0.198476	0.174944	0.206262		179	0.215752	0.276573	0.327113
180	0.197719	0.173954	0.204533		180	0.217668	0.276539	0.327525
181	0.19794	0.17415	0.202655		181	0.214711	0.276593	0.327897
182	0.196271	0.171726	0.202874		182	0.214428	0.277093	0.328928
183	0.194349	0.174196	0.202003		183	0.212802	0.277103	0.330943
184	0.192879	0.172154	0.199754		184	0.21114	0.276639	0.331176
185	0.190376	0.171782	0.199435		185	0.210694	0.275717	0.330054
186	0.1894	0.171679	0.199637		186	0.210343	0.273766	0.331763
187	0.188578	0.174251	0.198914		187	0.20939	0.27334	0.331967
188	0.188062	0.171334	0.19741		188	0.207773	0.273197	0.333795
189	0.189128	0.170695	0.197841		189	0.207618	0.273113	0.33327
190	0.191843	0.170208	0.193805		190	0.208239	0.272911	0.336885
191	0.191211	0.170314	0.191461		191	0.209695	0.273407	0.337858
192	0.191946	0.167749	0.190163		192	0.209883	0.272869	0.341372
193	0.190989	0.169441	0.188784		193	0.211231	0.271908	0.342428
194	0.190405	0.170375	0.186577		194	0.213057	0.269983	0.346741
195	0.188496	0.171704	0.188768		195	0.21465	0.269661	0.349527
196	0.18689	0.170639	0.18908		196	0.213	0.268484	0.351495
197	0.186185	0.171728	0.187027		197	0.213484	0.267801	0.352236
198	0.186126	0.171101	0.188428		198	0.211696	0.266095	0.350466
199	0.182947	0.170854	0.189994		199	0.211524	0.266587	0.349327
200	0.182518	0.169768	0.188079		200	0.209186	0.265756	0.349658
201	0.184004	0.170697	0.188305		201	0.211993	0.265261	0.347585
202	0.182544	0.171153	0.189676		202	0.213739	0.263447	0.346407
203	0.182899	0.172122	0.189185		203	0.212872	0.263804	0.348426
204	0.185336	0.173162	0.187001		204	0.214992	0.263051	0.34782
205	0.185588	0.174576	0.187228		205	0.216251	0.26203	0.345394
206	0.186261	0.176082	0.187023		206	0.217496	0.263175	0.343446
207	0.186884	0.178727	0.186531		207	0.216842	0.262992	0.344239
208	0.18502	0.179817	0.186243		208	0.220145	0.260229	0.340993
209	0.184054	0.178635	0.188878		209	0.220119	0.260202	0.341454
210	0.184466	0.178286	0.191562		210	0.218692	0.25923	0.340735
211	0.183907	0.177994	0.193029		211	0.218489	0.257492	0.341639
212	0.184592	0.176396	0.19426		212	0.220044	0.256471	0.338866
213	0.186308	0.176378	0.19584		213	0.218536	0.258124	0.340523
214	0.188306	0.173876	0.195557		214	0.221005	0.258415	0.336426
215	0.189341	0.173406	0.195145		215	0.226012	0.259143	0.335326
216	0.18788	0.173432	0.194158		216	0.226976	0.257717	0.334653
217	0.188367	0.171977	0.194553		217	0.227767	0.257819	0.334662
218	0.190331	0.170925	0.19378		218	0.231072	0.255442	0.333916
219	0.191231	0.173544	0.193656		219	0.231508	0.25403	0.336748
220	0.190486	0.174073	0.192245		220	0.233056	0.252555	0.337441
221	0.191369	0.173352	0.192644		221	0.234329	0.252754	0.340497
222	0.192225	0.174512	0.191143		222	0.238411	0.251188	0.343977
223	0.188574	0.17366	0.192975		223	0.23999	0.25157	0.34544
224	0.186915	0.173986	0.193938		224	0.239709	0.250403	0.345132
225	0.186947	0.174587	0.196345		225	0.238002	0.250068	0.345187
226	0.187645	0.173521	0.196766		226	0.239216	0.248904	0.343478
227	0.187933	0.170329	0.19842		227	0.242568	0.248019	0.342693
228	0.189121	0.171467	0.198336		228	0.24531	0.247472	0.343043
229	0.189799	0.171963	0.200982		229	0.246454	0.24738	0.34316
230	0.190166	0.171008	0.202623		230	0.24698	0.246847	0.342688
231	0.191647	0.173021	0.205214		231	0.247747	0.247016	0.342222
232	0.191183	0.173942	0.207938		232	0.2423	0.247206	0.338737
233	0.192342	0.17292	0.211841		233	0.241192	0.247368	0.336047
234	0.193133	0.169696	0.213691		234	0.244061	0.247797	0.333487
235	0.195988	0.168428	0.214914		235	0.246067	0.246945	0.333279
236	0.193423	0.166515	0.21702		236	0.247097	0.246679	0.331523
237	0.191971	0.168401	0.220508		237	0.251044	0.24751	0.331108
238	0.191479	0.168823	0.22075		238	0.249415	0.247536	0.331368
239	0.191635	0.170153	0.221033		239	0.248643	0.246497	0.330534
240	0.187899	0.171344	0.22285		240	0.249685	0.245888	0.328859
241	0.188389	0.170444	0.224132		241	0.250193	0.246175	0.327849
242	0.1892	0.168281	0.224135		242	0.251237	0.245732	0.326149
243	0.190009	0.167312	0.227399		243	0.254228	0.246679	0.321764
244	0.191116	0.166451	0.228688		244	0.25398	0.247866	0.322277
245	0.192113	0.165585	0.229183		245	0.252883	0.24927	0.320475
246	0.193568	0.165586	0.229276		246	0.250331	0.249198	0.31957
247	0.1925	0.166806	0.227783		247	0.245436	0.248514	0.318084
248	0.19279	0.166548	0.226735		248	0.244061	0.246031	0.317518
249	0.188784	0.165774	0.226319		249	0.244596	0.244908	0.315721
250	0.188754	0.165935	0.225868		250	0.243963	0.244169	0.314549
251	0.186809	0.166408	0.225334		251	0.246173	0.242807	0.313851
252	0.188308	0.165857	0.225066		252	0.248045	0.24347	0.315246
253	0.186433	0.164805	0.224541		253	0.252356	0.243849	0.316336
254	0.188362	0.165417	0.224754		254	0.252588	0.242987	0.316925
255	0.18914	0.165558	0.222624		255	0.25481	0.242418	0.317678
256	0.188613	0.166027	0.219669		256	0.253332	0.24378	0.318604
257	0.186123	0.164951	0.218704		257	0.255223	0.24506	0.317189
258	0.185834	0.166188	0.214939		258	0.25179	0.247149	0.314564
259	0.184898	0.165192	0.210749		259	0.254243	0.249571	0.314134
260	0.1831	0.164113	0.209271		260	0.255926	0.252922	0.312167
261	0.184103	0.162514	0.208103		261	0.262319	0.256337	0.308262
262	0.184184	0.162284	0.20476		262	0.266739	0.259107	0.305931
263	0.183431	0.162924	0.203809		263	0.271506	0.26167	0.30598
264	0.182614	0.16418	0.203988		264	0.275759	0.264046	0.301773
265	0.181838	0.165339	0.204714		265	0.284186	0.266893	0.303128
266	0.181045	0.166222	0.204572		266	0.289937	0.268998	0.304871
267	0.18199	0.166513	0.205413		267	0.294213	0.273188	0.30607
268	0.18113	0.164736	0.206022		268	0.299914	0.27854	0.307489
269	0.181453	0.163567	0.205062		269	0.304528	0.284039	0.308941
270	0.181155	0.162505	0.204127		270	0.309755	0.290489	0.307941
271	0.182209	0.162188	0.203959		271	0.308947	0.296913	0.307398
272	0.181286	0.161199	0.203527		272	0.31124	0.300635	0.30681
273	0.181872	0.161384	0.203138		273	0.313156	0.302675	0.304118
274	0.183042	0.163914	0.202241		274	0.315866	0.306152	0.305001
275	0.184154	0.164767	0.201309		275	0.316555	0.308664	0.305175
276	0.182728	0.166589	0.19991		276	0.321916	0.31204	0.305011
277	0.183422	0.169352	0.198444		277	0.326316	0.315205	0.307233
278	0.182555	0.170648	0.197121		278	0.328863	0.320734	0.309637
279	0.180295	0.170003	0.194268		279	0.328773	0.325573	0.312349
280	0.180222	0.171339	0.192086		280	0.326353	0.329065	0.313541
281	0.18152	0.173491	0.19166		281	0.321211	0.332147	0.314324
282	0.180399	0.175172	0.191223		282	0.316497	0.33285	0.313862
283	0.182109	0.177197	0.189347		283	0.312796	0.334351	0.312167
284	0.183438	0.180014	0.190714		284	0.310199	0.334287	0.31005
285	0.18336	0.183943	0.190828		285	0.306541	0.331669	0.308803
286	0.183621	0.181793	0.189959		286	0.305165	0.329991	0.308475
287	0.187801	0.18417	0.188327		287	0.302878	0.331339	0.310113
288	0.190054	0.186412	0.189044		288	0.300324	0.330307	0.313721
289	0.193177	0.190565	0.187815		289	0.299501	0.329518	0.314454
290	0.198131	0.188785	0.187405		290	0.296498	0.332622	0.314583
291	0.200291	0.194259	0.186627		291	0.294832	0.333911	0.314445
292	0.201963	0.198506	0.186662		292	0.290971	0.334893	0.312305
293	0.204982	0.201353	0.184958		293	0.287404	0.337396	0.311501
294	0.20509	0.201713	0.185538		294	0.284079	0.340458	0.311202
295	0.201459	0.206013	0.183895		295	0.282604	0.342419	0.309401
296	0.203171	0.20594	0.182017		296	0.28	0.344546	0.311004
297	0.201827	0.204219	0.181968		297	0.279693	0.346388	0.308703
298	0.198858	0.204329	0.181926		298	0.281724	0.348117	0.305222
299	0.198697	0.203103	0.181199		299	0.279927	0.345464	0.302856
300	0.200336	0.203479	0.181476		300	0.273444	0.34289	0.301861
301	0.198237	0.204287	0.181785		301	0.274594	0.340381	0.298238
302	0.196348	0.203362	0.181231		302	0.275645	0.338502	0.297217
303	0.195965	0.203819	0.180141		303	0.271615	0.334521	0.296392
304	0.196629	0.205248	0.17957		304	0.268243	0.334029	0.296637
305	0.196362	0.206525	0.179906		305	0.271377	0.334359	0.296853
306	0.196513	0.205699	0.180077		306	0.268797	0.333786	0.295705
307	0.199712	0.207197	0.180135		307	0.264319	0.332931	0.29558
308	0.202002	0.206786	0.1797		308	0.262525	0.331655	0.295344
309	0.202166	0.207472	0.179165		309	0.262206	0.332713	0.292424
310	0.203896	0.208079	0.1789		310	0.261097	0.332031	0.292421
311	0.206739	0.209072	0.179016		311	0.255961	0.333041	0.292663
312	0.208626	0.208701	0.179742		312	0.252524	0.33195	0.289643
313	0.210881	0.210323	0.179778		313	0.251313	0.332047	0.288923
314	0.212849	0.210949	0.179751		314	0.24642	0.331252	0.288604
315	0.213497	0.208344	0.178379		315	0.243936	0.330869	0.286774
316	0.213132	0.207959	0.178118		316	0.244358	0.32728	0.286903
317	0.214106	0.20657	0.177064		317	0.246547	0.328127	0.2876
318	0.213512	0.204604	0.177597		318	0.247447	0.327461	0.287947
319	0.213073	0.201014	0.177906		319	0.248277	0.32737	0.288672
320	0.216653	0.200182	0.177896		320	0.245985	0.326449	0.287078
321	0.218191	0.198651	0.175856		321	0.244014	0.327715	0.285994
322	0.219259	0.199916	0.174538		322	0.241011	0.325789	0.287684
323	0.220262	0.199024	0.173677		323	0.237993	0.326048	0.287985
324	0.224252	0.19908	0.174071		324	0.236955	0.323727	0.286073
325	0.225385	0.196947	0.172737		325	0.238505	0.320633	0.289453
326	0.227937	0.196748	0.173803		326	0.239537	0.318504	0.289694
327	0.227189	0.193945	0.173103		327	0.241325	0.315983	0.288778
328	0.230963	0.193719	0.173054		328	0.239181	0.311769	0.287409
329	0.230745	0.192941	0.172518		329	0.240759	0.310202	0.290621
330	0.232778	0.192493	0.175778		330	0.238835	0.310673	0.289516
331	0.234043	0.192316	0.177394		331	0.239778	0.309155	0.28995
332	0.235694	0.192787	0.179287		332	0.23742	0.310222	0.29244
333	0.236609	0.189609	0.181304		333	0.235728	0.312464	0.296908
334	0.238203	0.189769	0.183268		334	0.231715	0.312459	0.298731
335	0.237404	0.190484	0.182008		335	0.230032	0.310947	0.302063
336	0.235706	0.188238	0.183259		336	0.227827	0.310844	0.304342
337	0.234078	0.187443	0.18538		337	0.224905	0.310091	0.307132
338	0.230623	0.18902	0.186334		338	0.226089	0.309705	0.309857
339	0.230256	0.187161	0.186218		339	0.228191	0.309557	0.310847
340	0.227396	0.185283	0.18861		340	0.227422	0.311528	0.312463
341	0.229596	0.187184	0.188433		341	0.22643	0.311599	0.315227
342	0.230641	0.185941	0.188708		342	0.227173	0.311367	0.316412
343	0.232156	0.184376	0.1877		343	0.225271	0.309436	0.316995
344	0.229428	0.183918	0.187573		344	0.224787	0.308999	0.319787
345	0.229783	0.184131	0.188187		345	0.222744	0.307867	0.323347
346	0.225733	0.181681	0.189415		346	0.219136	0.308105	0.327606
347	0.224907	0.1801	0.188553		347	0.217564	0.308619	0.331592
348	0.22323	0.179418	0.190898		348	0.217057	0.310005	0.335985
349	0.222977	0.181071	0.19327		349	0.21386	0.311595	0.339853
350	0.223448	0.179964	0.193286		350	0.213381	0.311973	0.343069
351	0.224667	0.179452	0.191903		351	0.214743	0.313736	0.34656
352	0.22409	0.178629	0.193971		352	0.215254	0.312812	0.348328
353	0.222648	0.176769	0.193161		353	0.214383	0.311946	0.348601
354	0.222285	0.173684	0.193195		354	0.215417	0.312845	0.349456
355	0.222188	0.17251	0.193156		355	0.215915	0.313617	0.349254
356	0.219157	0.171597	0.196041		356	0.213667	0.314619	0.347446
357	0.220349	0.172814	0.196236		357	0.212299	0.316447	0.347718
358	0.219074	0.173879	0.196628		358	0.212226	0.317902	0.348171
359	0.216678	0.173028	0.196772		359	0.210286	0.316318	0.349125
360	0.211331	0.174557	0.195815		360	0.208717	0.315887	0.348474
361	0.20984	0.174695	0.194336		361	0.210353	0.312613	0.347798
362	0.205141	0.174585	0.193885		362	0.20917	0.311821	0.347031
363	0.202725	0.175706	0.193548		363	0.208013	0.310913	0.344144
364	0.202628	0.178785	0.192148		364	0.203943	0.311385	0.344135
365	0.203514	0.180236	0.192057		365	0.203237	0.310188	0.343182
366	0.202963	0.182373	0.190152		366	0.200741	0.310583	0.341276
367	0.203811	0.18412	0.189456		367	0.199502	0.308549	0.341108
368	0.204378	0.185075	0.190052		368	0.19993	0.307987	0.342983
369	0.20441	0.184569	0.18927		369	0.203634	0.30719	0.339765
370	0.203079	0.183804	0.189445		370	0.202868	0.307946	0.342188
371	0.203052	0.182551	0.191171		371	0.20133	0.307992	0.345619
372	0.202697	0.182024	0.190707		372	0.201702	0.308489	0.346073
373	0.202019	0.181962	0.188183		373	0.198734	0.308472	0.346944
374	0.20179	0.182899	0.189886		374	0.19558	0.30731	0.34714
375	0.202916	0.183281	0.189093		375	0.195314	0.306609	0.345354
376	0.20343	0.183533	0.188713		376	0.197573	0.306838	0.342025
377	0.201996	0.183217	0.187514		377	0.197395	0.306306	0.338661
378	0.200676	0.181536	0.188266		378	0.199071	0.305426	0.336416
379	0.198208	0.18039	0.186076		379	0.200925	0.305268	0.334319
380	0.195798	0.18008	0.185738		380	0.200343	0.303194	0.331573
381	0.192733	0.179911	0.184624		381	0.197225	0.300876	0.330875
382	0.193635	0.179487	0.184763		382	0.195691	0.298116	0.330623
383	0.193775	0.180009	0.183343		383	0.194459	0.296216	0.32744
384	0.195329	0.180162	0.182551		384	0.194006	0.293773	0.324714
385	0.194882	0.179562	0.182169		385	0.196743	0.292109	0.323656
386	0.197267	0.179337	0.180787		386	0.200202	0.290123	0.320214
387	0.198708	0.179318	0.180595		387	0.201018	0.289268	0.316861
388	0.201536	0.180096	0.182679		388	0.200714	0.286192	0.317898
389	0.202138	0.178668	0.18241		389	0.199734	0.284803	0.318522
390	0.205576	0.1774	0.18236		390	0.199405	0.282868	0.318012
391	0.206333	0.178267	0.18349		391	0.195964	0.281427	0.317662
392	0.206763	0.177609	0.184696		392	0.196173	0.279584	0.317955
393	0.208134	0.176443	0.18309		393	0.196756	0.278269	0.315209
394	0.209184	0.175757	0.183425		394	0.196936	0.276834	0.314342
395	0.21109	0.1768	0.183162		395	0.19482	0.277546	0.312301
396	0.213303	0.175355	0.181889		396	0.195222	0.278065	0.311681
397	0.213473	0.175809	0.179498		397	0.194247	0.278762	0.310702
398	0.21306	0.177643	0.178222		398	0.192682	0.280817	0.308535
399	0.21338	0.178814	0.177838		399	0.194377	0.279442	0.307464
400	0.211265	0.178579	0.177151		400	0.19637	0.277513	0.306833
401	0.211509	0.182133	0.177988		401	0.196467	0.275371	0.30605
402	0.213027	0.181703	0.176288		402	0.195845	0.274469	0.303177
403	0.21447	0.181564	0.176572		403	0.197033	0.273027	0.301689
404	0.218135	0.183244	0.176276		404	0.193983	0.273811	0.30052
405	0.220725	0.187801	0.176859		405	0.191507	0.275334	0.298551
406	0.220965	0.184749	0.176988		406	0.193089	0.276932	0.296741
407	0.218704	0.187473	0.177344		407	0.192792	0.278221	0.294911
408	0.21958	0.189883	0.177165		408	0.19205	0.280218	0.293202
409	0.218392	0.191657	0.177616		409	0.193005	0.282732	0.290175
410	0.217106	0.189977	0.176106		410	0.193882	0.283758	0.287533
411	0.21832	0.192978	0.17446		411	0.1931	0.284873	0.284781
412	0.222932	0.193485	0.174943		412	0.193189	0.286102	0.284293
413	0.223929	0.192179	0.176784		413	0.193797	0.287484	0.28175
414	0.224032	0.190886	0.175611		414	0.195331	0.287163	0.28012
415	0.227277	0.189937	0.176598		415	0.193404	0.28738	0.279484
416	0.225478	0.19155	0.177808		416	0.192809	0.28902	0.27893
417	0.220694	0.192639	0.179181		417	0.193271	0.290083	0.277942
418	0.216722	0.193013	0.176892		418	0.192965	0.290991	0.277982
419	0.214702	0.195821	0.176964		419	0.188418	0.291445	0.277146
420	0.213214	0.198526	0.174431		420	0.188802	0.291849	0.275829
421	0.213006	0.197626	0.174627		421	0.18787	0.290757	0.275818
422	0.214933	0.198745	0.173073		422	0.188872	0.290297	0.276815
423	0.219001	0.198683	0.173501		423	0.187496	0.288735	0.278956
424	0.219131	0.196303	0.174423		424	0.187467	0.288907	0.28002
425	0.21909	0.195709	0.176119		425	0.186908	0.288605	0.280562
426	0.219758	0.196701	0.175192		426	0.187736	0.287429	0.280256
427	0.219198	0.195817	0.177066		427	0.188773	0.286037	0.280532
428	0.217172	0.197298	0.17629		428	0.191716	0.285558	0.278182
429	0.217693	0.19901	0.175182		429	0.193961	0.287004	0.278998
430	0.216206	0.198802	0.175893		430	0.19465	0.285571	0.279543
431	0.219128	0.198238	0.175032		431	0.193236	0.285357	0.278548
432	0.219465	0.198874	0.173729		432	0.191517	0.285483	0.278355
433	0.219019	0.19806	0.173182		433	0.190142	0.285566	0.278068
434	0.219982	0.1942	0.174734		434	0.190298	0.282766	0.277023
435	0.220139	0.19411	0.174899		435	0.189295	0.282847	0.277781
436	0.216891	0.192888	0.175963		436	0.188836	0.28217	0.277646
437	0.217345	0.191844	0.176299		437	0.188216	0.281224	0.275862
438	0.218175	0.1915	0.177618		438	0.186816	0.281104	0.27746
439	0.216611	0.194815	0.176119		439	0.186402	0.280628	0.276858
440	0.217421	0.192688	0.175968		440	0.186137	0.279499	0.276252
441	0.218069	0.194096	0.175708		441	0.185923	0.280939	0.277755
442	0.218911	0.19381	0.174986		442	0.185634	0.282135	0.278005
443	0.218268	0.195025	0.173316		443	0.186547	0.281902	0.279668
444	0.218319	0.195568	0.172626		444	0.186445	0.280609	0.280761
445	0.219532	0.197342	0.172472		445	0.187108	0.280995	0.282833
446	0.220647	0.196907	0.172317		446	0.18912	0.28026	0.284768
447	0.218698	0.197884	0.172156		447	0.188001	0.278974	0.287173
448	0.215921	0.195257	0.173847		448	0.18865	0.278342	0.288583
449	0.21597	0.193289	0.174277		449	0.188143	0.280285	0.290794
450	0.211667	0.192105	0.173405		450	0.189303	0.281549	0.290161
451	0.2121	0.192242	0.173792		451	0.18985	0.28232	0.291254
452	0.210698	0.18938	0.174453		452	0.189635	0.282618	0.290794
453	0.212068	0.189267	0.174348		453	0.189234	0.282329	0.289305
454	0.209768	0.188764	0.174427		454	0.188483	0.282458	0.289554
455	0.210242	0.188183	0.175597		455	0.188263	0.281232	0.288529
456	0.206681	0.185794	0.176119		456	0.187528	0.27897	0.287961
457	0.205666	0.185117	0.17629		457	0.190242	0.27826	0.289286
458	0.203915	0.185842	0.177074		458	0.1896	0.278763	0.290454
459	0.205233	0.18592	0.17786		459	0.190586	0.278292	0.2914
460	0.204592	0.184811	0.177443		460	0.189606	0.278295	0.292931
461	0.20264	0.185635	0.175585		461	0.190874	0.278288	0.294912
462	0.204392	0.185515	0.176289		462	0.190004	0.278024	0.295843
463	0.205699	0.185337	0.174005		463	0.192242	0.277409	0.29752
464	0.204037	0.184955	0.173843		464	0.193456	0.277807	0.296095
465	0.203269	0.184647	0.173624		465	0.194163	0.277274	0.297399
466	0.204284	0.181821	0.175009		466	0.191538	0.279456	0.297878
467	0.199722	0.18194	0.174741		467	0.195928	0.280717	0.298857
468	0.197501	0.181742	0.176559		468	0.194933	0.282252	0.296084
469	0.195315	0.180403	0.176254		469	0.194346	0.283362	0.295795
470	0.194996	0.181127	0.177266		470	0.194235	0.28483	0.293807
471	0.192454	0.182036	0.177462		471	0.193571	0.28478	0.292289
472	0.194529	0.181863	0.176717		472	0.187927	0.284054	0.290378
473	0.192605	0.179343	0.174684		473	0.187049	0.282878	0.291162
474	0.19255	0.180116	0.174631		474	0.187654	0.280904	0.291062
475	0.190651	0.17972	0.173464		475	0.188014	0.281869	0.290093
476	0.191206	0.180132	0.172167		476	0.186865	0.281725	0.288869
477	0.189701	0.180175	0.172325		477	0.185534	0.283046	0.286886
478	0.189239	0.179834	0.174144		478	0.185024	0.286989	0.285975
479	0.186857	0.177529	0.173916		479	0.183891	0.291317	0.286849
480	0.187829	0.17763	0.173294		480	0.184765	0.293622	0.288054
481	0.186829	0.177087	0.174304		481	0.187099	0.299511	0.28778
482	0.186382	0.175626	0.173483		482	0.189127	0.304692	0.288109
483	0.187643	0.176357	0.172228		483	0.187348	0.307821	0.288369
484	0.189103	0.178727	0.17252		484	0.188102	0.311206	0.288341
485	0.186734	0.179569	0.17314		485	0.187686	0.314167	0.291508
486	0.187067	0.178212	0.172435		486	0.187461	0.315613	0.292103
487	0.187243	0.178918	0.172246		487	0.187444	0.318763	0.29422
488	0.188295	0.177488	0.172711		488	0.187603	0.319989	0.295379
489	0.189207	0.175671	0.17078		489	0.187838	0.32194	0.295778
490	0.189917	0.174283	0.170045		490	0.189883	0.324071	0.29334
491	0.188969	0.17681	0.169951		491	0.190408	0.32656	0.293622
492	0.190904	0.176091	0.17089		492	0.192815	0.325855	0.292368
493	0.190724	0.17528	0.170646		493	0.193814	0.326608	0.291508
494	0.193271	0.176146	0.173338		494	0.193922	0.327101	0.291285
495	0.196657	0.175779	0.173704		495	0.192039	0.327534	0.292175
496	0.198377	0.172019	0.175667		496	0.194681	0.327694	0.290971
497	0.20047	0.173441	0.175966		497	0.196312	0.328826	0.291211
498	0.202796	0.17609	0.177414		498	0.198951	0.330611	0.291847
499	0.203409	0.175419	0.177609		499	0.199278	0.329965	0.291475
500	0.203599	0.17645	0.180753		500	0.198997	0.330586	0.290343
501	0.206162	0.179011	0.181418		501	0.197177	0.328573	0.28816
502	0.206319	0.178036	0.182649		502	0.194778	0.326272	0.287101
503	0.206793	0.176564	0.183391		503	0.193085	0.324426	0.285829
504	0.206132	0.175649	0.183534		504	0.194125	0.323057	0.283034
505	0.206339	0.174068	0.182231		505	0.199539	0.321648	0.281493
506	0.207267	0.171819	0.181281		506	0.20251	0.320946	0.282181
507	0.210254	0.171808	0.18079		507	0.204088	0.321723	0.281566
508	0.211114	0.171078	0.179469		508	0.20717	0.323914	0.281179
509	0.212463	0.171321	0.178768		509	0.209355	0.327531	0.280942
510	0.21624	0.171667	0.178562		510	0.209213	0.329622	0.280036
511	0.217104	0.17185	0.178279		511	0.212968	0.331435	0.279526
512	0.215829	0.173038	0.178453		512	0.21244	0.335453	0.279428
513	0.216294	0.173542	0.179871		513	0.212889	0.335643	0.27887
514	0.221107	0.172951	0.180243		514	0.213401	0.335777	0.28039
515	0.223064	0.172113	0.181269		515	0.212455	0.337079	0.281929
516	0.224865	0.172988	0.182675		516	0.21024	0.338658	0.283505
517	0.226998	0.16983	0.180855		517	0.2139	0.337838	0.284097
518	0.230171	0.167993	0.180663		518	0.218453	0.336874	0.28299
519	0.22887	0.168668	0.18098		519	0.220252	0.336385	0.283076
520	0.22744	0.16799	0.179976		520	0.223558	0.335201	0.281874
521	0.226484	0.167825	0.178987		521	0.223996	0.333318	0.280808
522	0.225672	0.169155	0.181575		522	0.225495	0.333587	0.280919
523	0.223922	0.169539	0.182153		523	0.225033	0.332748	0.282039
524	0.223687	0.168562	0.182736		524	0.225953	0.332094	0.280951
525	0.220688	0.167752	0.183371		525	0.226512	0.331706	0.281636
526	0.221451	0.165965	0.184262		526	0.228384	0.332058	0.283064
527	0.219756	0.164633	0.185532		527	0.22629	0.328384	0.282001
528	0.220035	0.165607	0.185529		528	0.227755	0.325889	0.282893
529	0.217271	0.166623	0.18533		529	0.230351	0.322586	0.283157
530	0.219339	0.168797	0.185008		530	0.229996	0.320981	0.282227
531	0.215305	0.170913	0.184807		531	0.232429	0.31688	0.280919
532	0.212862	0.173563	0.185252		532	0.238682	0.314644	0.283141
533	0.211039	0.175795	0.187519		533	0.238107	0.313854	0.284252
534	0.210661	0.1765	0.187852		534	0.237439	0.315461	0.285322
535	0.209018	0.178197	0.190592		535	0.242314	0.314757	0.286938
536	0.210514	0.179968	0.19311		536	0.242806	0.31604	0.286734
537	0.211893	0.182263	0.192393		537	0.243305	0.31849	0.284601
538	0.212754	0.184587	0.191469		538	0.246365	0.319857	0.283182
539	0.21453	0.18689	0.19317		539	0.247533	0.319171	0.281863
540	0.214207	0.18836	0.195128		540	0.246893	0.319039	0.280498
541	0.21506	0.191704	0.194565		541	0.247948	0.320302	0.281794
542	0.213417	0.191146	0.197991		542	0.247675	0.319559	0.281884
543	0.211196	0.189076	0.200891		543	0.244894	0.320013	0.27988
544	0.209888	0.189935	0.202434		544	0.248462	0.321234	0.279793
545	0.209763	0.18688	0.203958		545	0.24949	0.322426	0.281115
546	0.208397	0.184702	0.205474		546	0.24986	0.322633	0.279426
547	0.210945	0.182547	0.204304		547	0.25348	0.326748	0.280891
548	0.214227	0.182959	0.203816		548	0.256796	0.328096	0.28255
549	0.214375	0.182283	0.204377		549	0.257691	0.327159	0.284014
550	0.215926	0.184608	0.203656		550	0.257189	0.330475	0.281745
551	0.21882	0.183744	0.204483		551	0.261725	0.33371	0.282736
552	0.21912	0.184505	0.205188		552	0.258707	0.333654	0.281178
553	0.219337	0.183471	0.206556		553	0.258581	0.336549	0.280198
554	0.219902	0.180759	0.20727		554	0.254823	0.34019	0.277131
555	0.221984	0.17975	0.208116		555	0.257788	0.340018	0.276694
556	0.223252	0.178495	0.20793		556	0.255863	0.341599	0.273505
557	0.225641	0.177519	0.21043		557	0.257643	0.346146	0.270318
558	0.225365	0.178421	0.210637		558	0.258496	0.349733	0.2688
559	0.228508	0.178885	0.212338		559	0.26165	0.354209	0.269065
560	0.228165	0.178308	0.211954		560	0.258213	0.355956	0.269301
561	0.228168	0.179123	0.212745		561	0.259872	0.356936	0.268748
562	0.227814	0.179479	0.212734		562	0.261208	0.354964	0.268363
563	0.22956	0.178121	0.211833		563	0.263785	0.353527	0.269482
564	0.232273	0.177619	0.211133		564	0.26474	0.349681	0.267653
565	0.234851	0.176687	0.21054		565	0.267086	0.351322	0.266469
566	0.235364	0.17389	0.211173		566	0.267067	0.35035	0.267565
567	0.238811	0.172416	0.211235		567	0.266877	0.3522	0.268154
568	0.23993	0.171304	0.213935		568	0.267462	0.352029	0.26573
569	0.235824	0.169745	0.213234		569	0.270768	0.353315	0.267361
570	0.231904	0.168848	0.2162		570	0.271103	0.352963	0.266887
571	0.230117	0.169037	0.215156		571	0.27484	0.353195	0.265874
572	0.223754	0.166986	0.2153		572	0.275902	0.352652	0.265256
573	0.220128	0.165723	0.214027		573	0.28154	0.354328	0.264724
574	0.216507	0.167291	0.215603		574	0.281921	0.356217	0.264216
575	0.21639	0.166829	0.213653		575	0.286244	0.358485	0.264636
576	0.213993	0.167745	0.213917		576	0.289529	0.359804	0.264964
577	0.213504	0.169192	0.213537		577	0.295349	0.359826	0.266052
578	0.212603	0.169919	0.213798		578	0.292343	0.3586	0.265787
579	0.213105	0.168561	0.211968		579	0.292849	0.358387	0.264171
580	0.211322	0.168217	0.211359		580	0.294727	0.354031	0.263042
581	0.209151	0.1683	0.213289		581	0.294752	0.352588	0.262479
582	0.207165	0.167108	0.211138		582	0.2975	0.351743	0.261669
583	0.20543	0.167733	0.21127		583	0.302394	0.349343	0.261202
584	0.203008	0.168416	0.211044		584	0.305635	0.345426	0.260748
585	0.200958	0.167313	0.211275		585	0.308247	0.345472	0.260717
586	0.198952	0.165756	0.210037		586	0.310508	0.342699	0.259823
587	0.196812	0.166942	0.209901		587	0.311057	0.341255	0.260651
588	0.193695	0.16577	0.208911		588	0.311033	0.338706	0.261962
589	0.194182	0.165051	0.210225		589	0.310611	0.338932	0.2632
590	0.193484	0.167039	0.209606		590	0.31006	0.337028	0.260781
591	0.194721	0.168341	0.209011		591	0.308586	0.336024	0.259377
592	0.196677	0.167786	0.208451		592	0.305997	0.333102	0.255605
593	0.199065	0.166415	0.208054		593	0.308136	0.333051	0.252346
594	0.20012	0.165666	0.20848		594	0.307192	0.330471	0.249129
595	0.198727	0.1655	0.209219		595	0.310792	0.329135	0.24843
596	0.198794	0.163767	0.209913		596	0.311601	0.329764	0.247393
597	0.197823	0.165204	0.212316		597	0.312076	0.329692	0.246292
598	0.195619	0.166572	0.21261		598	0.308468	0.329827	0.244581
599	0.193095	0.169094	0.212188		599	0.308907	0.330025	0.244602
600	0.192036	0.168128	0.211383		600	0.300213	0.331288	0.24425

## Sheet: graph
Figure2A
Fluctuation-positive cells(%)			Fluctuation amplitude (ΔF340/F380)
Vehicle	8-pCPT-cGMP		Vehicle	8-pCPT-cGMP
46.6667	76.6667		0.0504002	0.0664803
50	86.6667		0.0489177	0.0694366
56.6667	93.3333		0.0464509	0.0780228
50	80		0.0491694	0.0900356
60	73.3333		0.0553378	0.047053
36.6667	73.3333		0.0527963	0.0668881
50	93.3333		0.0466362	0.0996695
	90			0.0591508
	73.3333			0.0691564
