# Supplementary material for: C-type natriuretic peptide facilitates autonomic Ca2+ entry in growth plate chondrocytes for stimulating bone growth
Source: eLife. 2022 Mar 15;11:e71931. doi: 10.7554/eLife.71931 (PMC8923661; doi:10.7554/eLife.71931)
Supplement: Figure 2—source data 2. [file elife-71931-fig2-data2.xlsx]

## Sheet: trace
Figure 2B
CNP (300 nM) 2 mM KT5823
Times (s)	Cell1	Cell2	Cell3
0	0.228338	0.174793	0.36143
1	0.230111	0.175039	0.352685
2	0.230435	0.175165	0.348726
3	0.230227	0.172469	0.349117
4	0.231218	0.174034	0.349488
5	0.230434	0.174125	0.34991
6	0.230505	0.175717	0.351221
7	0.230479	0.175977	0.351853
8	0.230907	0.175947	0.353532
9	0.232202	0.174306	0.350695
10	0.233106	0.171365	0.349285
11	0.232966	0.171726	0.351352
12	0.232505	0.168728	0.349331
13	0.231539	0.165851	0.343199
14	0.229959	0.165919	0.344677
15	0.2303	0.165417	0.34186
16	0.230679	0.163292	0.341694
17	0.23224	0.16444	0.341632
18	0.23301	0.166152	0.338845
19	0.232724	0.163741	0.336436
20	0.234077	0.161584	0.334878
21	0.232685	0.159715	0.33306
22	0.231791	0.158861	0.328371
23	0.231398	0.158496	0.330241
24	0.232519	0.159667	0.328741
25	0.230127	0.165736	0.327477
26	0.230155	0.168537	0.325004
27	0.229903	0.171353	0.325802
28	0.229884	0.173081	0.325398
29	0.229653	0.17502	0.321932
30	0.229083	0.175914	0.320532
31	0.230019	0.179254	0.315948
32	0.231177	0.180732	0.312654
33	0.23112	0.183442	0.30959
34	0.231693	0.181666	0.308061
35	0.230694	0.1825	0.305863
36	0.229286	0.181693	0.304256
37	0.226753	0.182473	0.299916
38	0.225647	0.182329	0.294353
39	0.226409	0.186229	0.289879
40	0.227293	0.18479	0.289189
41	0.22594	0.18848	0.287003
42	0.225026	0.193244	0.285836
43	0.223957	0.195311	0.283917
44	0.219913	0.198143	0.28201
45	0.218444	0.199797	0.277106
46	0.217047	0.195911	0.273492
47	0.217348	0.189852	0.27019
48	0.217898	0.185817	0.272137
49	0.218074	0.181835	0.27277
50	0.216548	0.179001	0.271143
51	0.217102	0.177383	0.270047
52	0.215306	0.174489	0.2696
53	0.214405	0.173894	0.262761
54	0.212392	0.172277	0.261763
55	0.21205	0.172658	0.263272
56	0.210801	0.172285	0.263311
57	0.209608	0.174352	0.263976
58	0.208205	0.173195	0.263496
59	0.208538	0.173218	0.262099
60	0.206959	0.171044	0.259887
61	0.207375	0.172107	0.259546
62	0.208161	0.167499	0.259029
63	0.207809	0.167123	0.259925
64	0.208112	0.165646	0.257839
65	0.209536	0.163619	0.255584
66	0.208207	0.15981	0.252438
67	0.208769	0.159324	0.249456
68	0.207968	0.158655	0.247625
69	0.207291	0.156611	0.245418
70	0.207342	0.159257	0.245871
71	0.207906	0.161497	0.247037
72	0.206941	0.161942	0.247638
73	0.209171	0.16082	0.246207
74	0.209522	0.159972	0.248965
75	0.210401	0.155023	0.248782
76	0.21143	0.154108	0.248012
77	0.213151	0.154387	0.247084
78	0.213532	0.154191	0.248482
79	0.214372	0.156178	0.246014
80	0.215074	0.158236	0.244932
81	0.216169	0.15955	0.242972
82	0.216554	0.159484	0.243678
83	0.215807	0.15973	0.243771
84	0.215451	0.159193	0.245691
85	0.215585	0.161119	0.244727
86	0.215678	0.159191	0.24609
87	0.215067	0.161825	0.245072
88	0.215824	0.162681	0.244396
89	0.21721	0.163531	0.242634
90	0.217025	0.162469	0.241063
91	0.218859	0.162451	0.23981
92	0.220335	0.161651	0.241437
93	0.221923	0.161028	0.240397
94	0.222643	0.158469	0.24176
95	0.223494	0.161864	0.24448
96	0.223635	0.163058	0.246027
97	0.224176	0.165409	0.244171
98	0.225388	0.165202	0.245433
99	0.227237	0.171406	0.246281
100	0.228508	0.172444	0.245945
101	0.227999	0.176997	0.244997
102	0.230145	0.182964	0.246381
103	0.230542	0.196636	0.24575
104	0.230005	0.202614	0.244728
105	0.232458	0.209646	0.243335
106	0.234462	0.218489	0.243971
107	0.235826	0.226483	0.24384
108	0.23786	0.22802	0.244446
109	0.238225	0.232439	0.242368
110	0.236589	0.237081	0.241162
111	0.236496	0.237351	0.241053
112	0.236067	0.234265	0.238054
113	0.233027	0.236478	0.239849
114	0.234855	0.236595	0.243402
115	0.235564	0.235605	0.249093
116	0.237274	0.238129	0.248719
117	0.237853	0.239555	0.253883
118	0.240878	0.237828	0.253139
119	0.24123	0.240767	0.252295
120	0.245506	0.241611	0.250804
121	0.245487	0.23734	0.253507
122	0.247731	0.240214	0.249952
123	0.249686	0.238837	0.250084
124	0.251748	0.237894	0.250816
125	0.251453	0.239472	0.250372
126	0.255022	0.244083	0.249125
127	0.257891	0.243285	0.253496
128	0.259309	0.24736	0.256718
129	0.26194	0.249212	0.256334
130	0.264119	0.251112	0.256633
131	0.265248	0.250298	0.259996
132	0.266759	0.244761	0.260673
133	0.270237	0.242749	0.262597
134	0.271707	0.236208	0.267417
135	0.274649	0.230348	0.272495
136	0.27664	0.22514	0.27597
137	0.279247	0.227016	0.280622
138	0.280349	0.224845	0.28368
139	0.282404	0.22415	0.283202
140	0.284446	0.221705	0.286096
141	0.284018	0.218413	0.286403
142	0.283006	0.214451	0.283883
143	0.283608	0.207521	0.282983
144	0.285067	0.20342	0.288215
145	0.285628	0.197203	0.288144
146	0.288573	0.195762	0.29135
147	0.292193	0.193455	0.296286
148	0.293775	0.19741	0.301265
149	0.293968	0.198134	0.304011
150	0.293115	0.199889	0.310446
151	0.295662	0.199875	0.31757
152	0.294099	0.201386	0.323522
153	0.294797	0.200166	0.327631
154	0.295734	0.200569	0.331329
155	0.29814	0.199952	0.334238
156	0.29712	0.202912	0.334003
157	0.300282	0.201454	0.336925
158	0.300397	0.203419	0.340006
159	0.302084	0.208282	0.342233
160	0.299974	0.213171	0.34879
161	0.299842	0.217969	0.35326
162	0.296797	0.224268	0.359567
163	0.294416	0.226708	0.3673
164	0.290028	0.228179	0.373142
165	0.290745	0.23509	0.373166
166	0.288849	0.241491	0.375047
167	0.286704	0.242294	0.380083
168	0.284999	0.243364	0.379806
169	0.284999	0.244012	0.381248
170	0.285843	0.236885	0.383592
171	0.283676	0.227509	0.388619
172	0.282891	0.225843	0.384187
173	0.283811	0.222961	0.38371
174	0.284872	0.219929	0.386095
175	0.28184	0.22063	0.390796
176	0.281698	0.21837	0.390511
177	0.279839	0.214254	0.391479
178	0.279507	0.213885	0.392208
179	0.27598	0.211905	0.388697
180	0.273249	0.206114	0.384646
181	0.272101	0.20113	0.379929
182	0.272683	0.197414	0.375898
183	0.270347	0.190778	0.373304
184	0.270396	0.186823	0.375158
185	0.269105	0.188561	0.368456
186	0.268037	0.192559	0.367016
187	0.266144	0.195604	0.364547
188	0.264675	0.194797	0.362557
189	0.261472	0.192726	0.356531
190	0.260168	0.190349	0.355318
191	0.257111	0.186095	0.35365
192	0.256328	0.180711	0.350171
193	0.255442	0.180638	0.346825
194	0.254782	0.180453	0.34383
195	0.254017	0.177928	0.34178
196	0.253331	0.177406	0.337985
197	0.25181	0.175791	0.337308
198	0.249474	0.17447	0.338574
199	0.248093	0.172812	0.334146
200	0.245799	0.172562	0.332149
201	0.244262	0.169581	0.326723
202	0.243124	0.167099	0.322575
203	0.242707	0.168016	0.31694
204	0.241521	0.167509	0.313424
205	0.240664	0.167966	0.311093
206	0.240427	0.169254	0.309765
207	0.237646	0.175329	0.30509
208	0.237352	0.177125	0.301261
209	0.237293	0.178467	0.300817
210	0.238418	0.178299	0.296988
211	0.23939	0.177645	0.295784
212	0.240061	0.176293	0.295204
213	0.240288	0.17568	0.291167
214	0.242596	0.177234	0.288225
215	0.24151	0.176234	0.283401
216	0.240836	0.180588	0.279875
217	0.240173	0.181934	0.277743
218	0.241414	0.183099	0.277923
219	0.238367	0.181609	0.276178
220	0.238212	0.187203	0.276194
221	0.239353	0.187073	0.27645
222	0.240115	0.1898	0.275379
223	0.237283	0.189959	0.269522
224	0.238708	0.194731	0.266803
225	0.23924	0.192883	0.263071
226	0.236706	0.192845	0.258947
227	0.236828	0.192961	0.258051
228	0.236539	0.191609	0.261435
229	0.235855	0.190013	0.262194
230	0.233741	0.189024	0.26365
231	0.233317	0.191296	0.263549
232	0.232791	0.194929	0.26234
233	0.23188	0.19655	0.259445
234	0.229823	0.194918	0.256946
235	0.230854	0.196621	0.255602
236	0.230582	0.193768	0.254519
237	0.229032	0.186873	0.252041
238	0.22971	0.186962	0.252418
239	0.228998	0.184886	0.252162
240	0.226432	0.182906	0.252804
241	0.224419	0.182814	0.252635
242	0.225579	0.185053	0.255051
243	0.223792	0.183491	0.253925
244	0.223946	0.186641	0.255933
245	0.224814	0.187999	0.256415
246	0.225118	0.190047	0.256787
247	0.223292	0.189456	0.255624
248	0.225588	0.185049	0.254831
249	0.226499	0.182692	0.254425
250	0.227402	0.181877	0.253197
251	0.230055	0.17753	0.250599
252	0.231109	0.176696	0.246709
253	0.230172	0.181195	0.244207
254	0.229745	0.182822	0.240765
255	0.230451	0.182222	0.242157
256	0.229642	0.184242	0.243568
257	0.232368	0.184336	0.245721
258	0.232113	0.182671	0.245617
259	0.232606	0.183901	0.24853
260	0.233514	0.186071	0.246392
261	0.234405	0.186852	0.245603
262	0.231407	0.186551	0.24707
263	0.233377	0.191935	0.247634
264	0.235628	0.1931	0.248389
265	0.235023	0.193044	0.246927
266	0.236954	0.191523	0.247216
267	0.23856	0.191716	0.246301
268	0.236951	0.186344	0.244797
269	0.235381	0.183273	0.242553
270	0.235108	0.179353	0.245636
271	0.233374	0.178728	0.245928
272	0.235703	0.176782	0.244064
273	0.237617	0.178662	0.243708
274	0.23802	0.179004	0.240679
275	0.238246	0.180147	0.236406
276	0.238137	0.181735	0.23475
277	0.236423	0.182037	0.235134
278	0.235106	0.18068	0.237216
279	0.233588	0.178155	0.241812
280	0.232786	0.176615	0.242733
281	0.232653	0.175068	0.242824
282	0.231186	0.17638	0.242506
283	0.228931	0.177655	0.240779
284	0.228472	0.180533	0.239966
285	0.228862	0.180809	0.239356
286	0.230274	0.181438	0.238781
287	0.231177	0.18286	0.236483
288	0.232603	0.17928	0.236699
289	0.233533	0.179676	0.237279
290	0.233856	0.182255	0.237083
291	0.230636	0.182364	0.236755
292	0.228935	0.181618	0.235045
293	0.228666	0.185487	0.232922
294	0.226535	0.187194	0.228249
295	0.224511	0.187149	0.228283
296	0.224122	0.185416	0.228419
297	0.223661	0.18342	0.231617
298	0.221363	0.180638	0.236218
299	0.221658	0.17884	0.237945
300	0.220859	0.176854	0.237901
301	0.219467	0.178656	0.237351
302	0.217767	0.180325	0.236822
303	0.218767	0.181588	0.236661
304	0.220436	0.182473	0.236176
305	0.219999	0.186639	0.235983
306	0.219267	0.189119	0.237833
307	0.219285	0.188338	0.23974
308	0.218677	0.189193	0.240686
309	0.2162	0.186303	0.243796
310	0.215207	0.183535	0.247901
311	0.214912	0.181574	0.251111
312	0.214997	0.18252	0.254543
313	0.213712	0.181467	0.25827
314	0.212545	0.181972	0.259591
315	0.211595	0.1837	0.260202
316	0.211613	0.184121	0.259886
317	0.20974	0.184793	0.264164
318	0.210155	0.188752	0.265059
319	0.209972	0.188743	0.268368
320	0.210959	0.186639	0.272704
321	0.210243	0.184808	0.277084
322	0.211856	0.183941	0.272252
323	0.211401	0.180153	0.273103
324	0.211528	0.182325	0.272375
325	0.210337	0.182819	0.273537
326	0.211739	0.185576	0.277442
327	0.2107	0.188794	0.28388
328	0.210975	0.192456	0.282881
329	0.211901	0.192989	0.285596
330	0.214584	0.195304	0.287985
331	0.214084	0.195267	0.289811
332	0.214604	0.193806	0.290575
333	0.215547	0.191171	0.29821
334	0.213907	0.190998	0.300778
335	0.212968	0.187855	0.30033
336	0.212555	0.18445	0.298187
337	0.211969	0.180704	0.297377
338	0.212091	0.180416	0.292863
339	0.214661	0.178815	0.29543
340	0.214429	0.176632	0.297805
341	0.215476	0.177883	0.303536
342	0.217407	0.179307	0.305056
343	0.218263	0.176842	0.308578
344	0.216328	0.174758	0.308929
345	0.215869	0.177829	0.310218
346	0.214741	0.17764	0.309485
347	0.214008	0.176739	0.310821
348	0.212235	0.176332	0.313377
349	0.212702	0.174274	0.31464
350	0.21373	0.171055	0.315356
351	0.214824	0.167118	0.313061
352	0.215321	0.166021	0.319572
353	0.214679	0.164421	0.321934
354	0.216477	0.163043	0.324829
355	0.216602	0.162767	0.329589
356	0.218521	0.161933	0.335975
357	0.217496	0.159101	0.339951
358	0.218838	0.159566	0.340872
359	0.217114	0.161544	0.345526
360	0.217713	0.162219	0.347285
361	0.216573	0.165852	0.350669
362	0.216921	0.167732	0.350112
363	0.216201	0.168385	0.356151
364	0.218	0.170447	0.356317
365	0.21754	0.173117	0.356204
366	0.216217	0.17193	0.358647
367	0.216532	0.175307	0.359987
368	0.216182	0.177854	0.359392
369	0.213631	0.176425	0.361144
370	0.212357	0.173766	0.36126
371	0.212441	0.176223	0.362861
372	0.213309	0.173277	0.366114
373	0.214417	0.174832	0.367561
374	0.215738	0.176443	0.366697
375	0.217961	0.181888	0.369053
376	0.21903	0.182967	0.369402
377	0.218809	0.184572	0.369697
378	0.219022	0.183895	0.369706
379	0.219959	0.186223	0.374202
380	0.220053	0.186635	0.375418
381	0.219518	0.185972	0.371373
382	0.217785	0.187938	0.368259
383	0.216262	0.190992	0.36839
384	0.215868	0.192616	0.368761
385	0.213588	0.19439	0.368941
386	0.214029	0.19669	0.370872
387	0.215546	0.195985	0.372473
388	0.217841	0.192718	0.368923
389	0.217433	0.189577	0.368559
390	0.218695	0.182341	0.365184
391	0.220054	0.177407	0.360406
392	0.220033	0.177302	0.359075
393	0.219821	0.175246	0.356648
394	0.220469	0.172182	0.349696
395	0.220549	0.171013	0.348863
396	0.21845	0.17215	0.348462
397	0.218454	0.168454	0.343565
398	0.218599	0.168142	0.347796
399	0.217556	0.167508	0.347593
400	0.216295	0.170444	0.344934
401	0.215772	0.171477	0.347593
402	0.214484	0.171279	0.348367
403	0.21106	0.171294	0.345864
404	0.210915	0.171653	0.343184
405	0.210603	0.169782	0.344739
406	0.211168	0.166277	0.340486
407	0.210288	0.167086	0.340232
408	0.212029	0.163024	0.338849
409	0.213596	0.161782	0.33824
410	0.215893	0.159708	0.340024
411	0.217457	0.159192	0.339724
412	0.219971	0.158762	0.337544
413	0.22102	0.161151	0.337531
414	0.220246	0.162413	0.33635
415	0.221698	0.163726	0.327755
416	0.22273	0.166899	0.328093
417	0.223546	0.165654	0.326254
418	0.224062	0.16575	0.32412
419	0.224706	0.164181	0.321905
420	0.224434	0.161084	0.324623
421	0.225067	0.158267	0.323502
422	0.225636	0.157096	0.318983
423	0.227998	0.155479	0.316228
424	0.23049	0.157039	0.318125
425	0.230619	0.161536	0.316241
426	0.230008	0.16236	0.312831
427	0.230221	0.160311	0.316893
428	0.23005	0.161466	0.314656
429	0.22981	0.159956	0.312199
430	0.230036	0.155797	0.312411
431	0.229714	0.157369	0.306874
432	0.229812	0.158948	0.301226
433	0.229309	0.158696	0.297374
434	0.229105	0.158347	0.294691
435	0.227353	0.160755	0.288709
436	0.226953	0.159894	0.292894
437	0.227204	0.160417	0.289807
438	0.226936	0.160778	0.2868
439	0.22547	0.162805	0.280177
440	0.226729	0.161807	0.277086
441	0.227862	0.157198	0.270667
442	0.227716	0.159881	0.270236
443	0.228984	0.157954	0.267829
444	0.23314	0.156568	0.266723
445	0.234767	0.15575	0.26394
446	0.234941	0.158058	0.26096
447	0.233589	0.15522	0.257473
448	0.234107	0.155886	0.260345
449	0.231666	0.155176	0.259316
450	0.231813	0.154793	0.260795
451	0.234188	0.155096	0.260317
452	0.237877	0.154139	0.261317
453	0.237635	0.153725	0.257057
454	0.237418	0.156279	0.258279
455	0.235483	0.158375	0.25758
456	0.232949	0.156978	0.259405
457	0.232703	0.157047	0.256995
458	0.232806	0.156798	0.254737
459	0.23404	0.15351	0.250694
460	0.236959	0.150599	0.245178
461	0.237609	0.150547	0.240996
462	0.237276	0.14968	0.238111
463	0.238196	0.148429	0.236021
464	0.239181	0.149529	0.235154
465	0.23915	0.147547	0.237219
466	0.240069	0.14709	0.235943
467	0.240256	0.146342	0.2353
468	0.240167	0.147968	0.236932
469	0.24098	0.147178	0.235814
470	0.239404	0.14966	0.234982
471	0.241548	0.148386	0.235846
472	0.242796	0.149707	0.237473
473	0.243117	0.148264	0.236901
474	0.242755	0.147086	0.237947
475	0.242783	0.147469	0.235437
476	0.241762	0.150548	0.235215
477	0.242105	0.151456	0.237205
478	0.241688	0.152104	0.236422
479	0.239778	0.155351	0.235816
480	0.240122	0.154636	0.239861
481	0.241121	0.153518	0.240373
482	0.238419	0.150235	0.238892
483	0.237657	0.150433	0.240911
484	0.238326	0.146203	0.240784
485	0.239396	0.147985	0.239915
486	0.238357	0.146101	0.237515
487	0.240437	0.14746	0.237378
488	0.242089	0.148092	0.234202
489	0.244412	0.148862	0.23461
490	0.244139	0.146897	0.233751
491	0.245052	0.14832	0.23456
492	0.245235	0.150854	0.234718
493	0.244297	0.149696	0.23415
494	0.243803	0.151704	0.234551
495	0.245254	0.149986	0.233995
496	0.245003	0.149293	0.234183
497	0.244036	0.148069	0.233188
498	0.244211	0.146464	0.236153
499	0.243987	0.145402	0.234951
500	0.244605	0.148496	0.233626
501	0.244376	0.148552	0.229435
502	0.244763	0.147224	0.230801
503	0.245702	0.147669	0.227818
504	0.245797	0.14449	0.228663
505	0.24441	0.144515	0.23032
506	0.244277	0.143883	0.233049
507	0.246473	0.144908	0.231704
508	0.248213	0.145924	0.233714
509	0.249352	0.148403	0.234215
510	0.250153	0.148188	0.233295
511	0.249672	0.147878	0.233879
512	0.247307	0.146714	0.23444
513	0.247155	0.145549	0.233602
514	0.24543	0.144898	0.234936
515	0.244752	0.143778	0.238043
516	0.244619	0.144416	0.237628
517	0.246674	0.146458	0.237458
518	0.245725	0.148773	0.240401
519	0.244715	0.152083	0.241176
520	0.245269	0.152582	0.238143
521	0.246018	0.15204	0.240402
522	0.245979	0.152204	0.240467
523	0.245456	0.152798	0.238469
524	0.246996	0.15118	0.234071
525	0.246926	0.152101	0.231837
526	0.249515	0.154287	0.233087
527	0.249389	0.154573	0.231685
528	0.250526	0.156069	0.229502
529	0.250063	0.156071	0.228589
530	0.25221	0.155458	0.229064
531	0.250102	0.158573	0.22245
532	0.249735	0.159115	0.217809
533	0.248846	0.157829	0.217216
534	0.249222	0.158599	0.218828
535	0.24684	0.157059	0.219167
536	0.244368	0.154334	0.219931
537	0.243861	0.155244	0.219547
538	0.242807	0.155295	0.221059
539	0.240823	0.154845	0.219253
540	0.238752	0.157665	0.218772
541	0.237339	0.155449	0.222359
542	0.234814	0.152125	0.228274
543	0.231196	0.150222	0.224663
544	0.227925	0.148522	0.225066
545	0.227523	0.148212	0.225657
546	0.227486	0.150723	0.221726
547	0.226725	0.150849	0.216656
548	0.225267	0.151582	0.220338
549	0.22268	0.152941	0.220683
550	0.219303	0.153285	0.220072
551	0.216824	0.152245	0.221351
552	0.213995	0.155952	0.224129
553	0.215023	0.155833	0.223846
554	0.216909	0.156137	0.226522
555	0.216822	0.156337	0.227106
556	0.215831	0.156402	0.227266
557	0.2158	0.153895	0.224494
558	0.213995	0.152791	0.2222
559	0.213917	0.150153	0.219088
560	0.213867	0.147096	0.217378
561	0.214626	0.147137	0.217986
562	0.214164	0.148298	0.22066
563	0.213323	0.149067	0.221749
564	0.210921	0.149831	0.222584
565	0.209879	0.151796	0.223279
566	0.206252	0.150799	0.224806
567	0.20365	0.150259	0.224678
568	0.201526	0.151707	0.226535
569	0.200895	0.153042	0.225909
570	0.200474	0.151674	0.225283
571	0.202178	0.151445	0.222441
572	0.202982	0.150803	0.223485
573	0.206574	0.149975	0.223192
574	0.208213	0.151552	0.226883
575	0.2083	0.152926	0.229639
576	0.207929	0.153632	0.232552
577	0.208138	0.156594	0.233411
578	0.205943	0.156841	0.229562
579	0.205553	0.156813	0.227698
580	0.206443	0.156859	0.227169
581	0.205305	0.1571	0.225138
582	0.205995	0.155485	0.22391
583	0.205238	0.157394	0.228782
584	0.20342	0.15667	0.227717
585	0.200417	0.157991	0.226267
586	0.202202	0.156941	0.229981
587	0.200192	0.15587	0.228342
588	0.200373	0.155501	0.224466
589	0.201314	0.156221	0.224359
590	0.201949	0.159613	0.225208
591	0.200465	0.163772	0.221931
592	0.200925	0.167246	0.222843
593	0.200097	0.166639	0.224368
594	0.199149	0.168951	0.22369
595	0.198943	0.167664	0.222631
596	0.198155	0.170097	0.220585
597	0.198281	0.170682	0.219183
598	0.197258	0.174596	0.218426
599	0.196694	0.17807	0.215395
600	0.197059	0.17901	0.211645
601	0.198343	0.17681	0.209061
602	0.197888	0.179822	0.211392
603	0.200072	0.180742	0.211055
604	0.200929	0.18178	0.213357
605	0.201069	0.183611	0.219767
606	0.198965	0.189625	0.225531
607	0.199356	0.189732	0.224604
608	0.196698	0.194958	0.226278
609	0.196686	0.192017	0.227843
610	0.194655	0.193831	0.228228
611	0.193776	0.193766	0.228349
612	0.191704	0.197702	0.232205
613	0.191156	0.195306	0.231291
614	0.190286	0.198123	0.231237
615	0.189252	0.199931	0.231803
616	0.189205	0.201904	0.229664
617	0.189045	0.202165	0.22696
618	0.188811	0.205954	0.227882
619	0.187033	0.210692	0.228633
620	0.186852	0.216994	0.226968
621	0.186667	0.224338	0.228129
622	0.186342	0.230928	0.228556
623	0.188017	0.236911	0.228712
624	0.188874	0.243096	0.228811
625	0.18956	0.244263	0.229436
626	0.191346	0.245754	0.229877
627	0.189472	0.251837	0.231322
628	0.189355	0.249547	0.233932
629	0.190135	0.251322	0.234425
630	0.190973	0.250771	0.232893
631	0.191416	0.249577	0.23127
632	0.194237	0.245211	0.228195
633	0.193242	0.245741	0.227608
634	0.192679	0.243546	0.226602
635	0.192877	0.244376	0.224994
636	0.190736	0.242967	0.225263
637	0.190101	0.24231	0.226736
638	0.189334	0.244742	0.22415
639	0.18883	0.244994	0.22313
640	0.187346	0.242558	0.227912
641	0.188202	0.241057	0.230443
642	0.187042	0.237674	0.231315
643	0.187134	0.235856	0.232272
644	0.186005	0.232458	0.23406
645	0.185812	0.232031	0.23298
646	0.185178	0.231523	0.231796
647	0.185986	0.232298	0.231266
648	0.185652	0.234138	0.23125
649	0.18759	0.237843	0.231769
650	0.187623	0.241579	0.229517
651	0.187643	0.241641	0.231401
652	0.18824	0.237106	0.230682
653	0.18862	0.234914	0.233255
654	0.189324	0.229841	0.234125
655	0.189416	0.224283	0.235582
656	0.190511	0.219841	0.233164
657	0.188903	0.220223	0.236571
658	0.188735	0.214531	0.235995
659	0.186382	0.211182	0.235991
660	0.185658	0.207836	0.237759
661	0.184353	0.207124	0.24222
662	0.184746	0.206446	0.243524
663	0.184425	0.205636	0.249018
664	0.183771	0.204659	0.252486
665	0.183775	0.206837	0.254958
666	0.183746	0.206783	0.257583
667	0.182358	0.207888	0.260611
668	0.181505	0.208212	0.262845
669	0.18179	0.210896	0.266839
670	0.182589	0.211329	0.270875
671	0.183758	0.21389	0.271304
672	0.186028	0.209328	0.272804
673	0.187849	0.210005	0.276109
674	0.188792	0.209643	0.277429
675	0.189651	0.210193	0.280138
676	0.189281	0.20642	0.284741
677	0.189072	0.21116	0.290571
678	0.190235	0.211591	0.291354
679	0.192444	0.207654	0.296907
680	0.192979	0.204479	0.301544
681	0.194506	0.205684	0.307037
682	0.195528	0.199233	0.310506
683	0.196366	0.194631	0.314847
684	0.196732	0.196536	0.31705
685	0.199261	0.194573	0.321323
686	0.199412	0.190297	0.329632
687	0.200097	0.192626	0.333839
688	0.200216	0.192768	0.338594
689	0.200064	0.188852	0.344842
690	0.199834	0.185915	0.348114
691	0.199442	0.18537	0.348349
692	0.198538	0.182228	0.350456
693	0.197263	0.179418	0.34827
694	0.196611	0.177334	0.344638
695	0.196215	0.17864	0.342992
696	0.198071	0.178427	0.337312
697	0.201274	0.178028	0.338879
698	0.202752	0.17966	0.341127
699	0.202551	0.178868	0.340361
700	0.201727	0.175899	0.338973
701	0.20056	0.174973	0.340984
702	0.197376	0.174345	0.339987
703	0.197621	0.174563	0.334172
704	0.197814	0.176475	0.335384
705	0.197674	0.177656	0.337359
706	0.197797	0.178888	0.335372
707	0.199215	0.179895	0.32858
708	0.199829	0.177436	0.334103
709	0.200096	0.175104	0.331888
710	0.199604	0.174808	0.327738
711	0.198459	0.175084	0.32998
712	0.197112	0.173033	0.32942
713	0.195238	0.172278	0.329108
714	0.195105	0.176508	0.327256
715	0.194565	0.177477	0.327982
716	0.195002	0.179862	0.320981
717	0.194964	0.18141	0.32051
718	0.195336	0.186612	0.317571
719	0.19515	0.191637	0.316662
720	0.195286	0.196737	0.314447
721	0.194722	0.197842	0.312146
722	0.195498	0.201	0.311796
723	0.195073	0.203104	0.308111
724	0.196028	0.203215	0.301675
725	0.197353	0.203377	0.298952
726	0.200014	0.203775	0.299189
727	0.201795	0.207423	0.293067
728	0.201832	0.207016	0.291135
729	0.202089	0.202994	0.295664
730	0.201815	0.203283	0.295647
731	0.202068	0.201057	0.293285
732	0.202041	0.198436	0.29427
733	0.203723	0.196979	0.292333
734	0.203991	0.197087	0.290856
735	0.205443	0.193785	0.288047
736	0.206751	0.195785	0.290347
737	0.206095	0.194244	0.289939
738	0.206691	0.194052	0.287521
739	0.206542	0.192746	0.285379
740	0.206552	0.191912	0.286108
741	0.204814	0.188317	0.281406
742	0.206757	0.186157	0.281214
743	0.206314	0.182016	0.283189
744	0.207524	0.181743	0.284866
745	0.209764	0.17865	0.282231
746	0.209115	0.177703	0.283428
747	0.209142	0.176284	0.282217
748	0.210485	0.177303	0.27921
749	0.21119	0.176761	0.275645
750	0.209488	0.176425	0.274659
751	0.210875	0.176053	0.273958
752	0.210314	0.173398	0.270009
753	0.209429	0.172958	0.271914
754	0.208936	0.169343	0.271815
755	0.208099	0.166969	0.27383
756	0.207987	0.165542	0.276136
757	0.207014	0.166146	0.27969
758	0.204671	0.161674	0.280528
759	0.204471	0.160759	0.282613
760	0.203267	0.162199	0.280831
761	0.201259	0.160641	0.276976
762	0.201129	0.159911	0.278121
763	0.204107	0.161562	0.275184
764	0.20334	0.161623	0.275594
765	0.204101	0.163755	0.280325
766	0.206168	0.163395	0.28541
767	0.206246	0.165773	0.285053
768	0.204298	0.167936	0.290039
769	0.204843	0.168511	0.290722
770	0.205919	0.167739	0.288836
771	0.206522	0.170154	0.288735
772	0.208023	0.170468	0.28899
773	0.209391	0.171083	0.286944
774	0.209936	0.1724	0.285395
775	0.209005	0.173457	0.283043
776	0.208248	0.172809	0.280198
777	0.20802	0.171472	0.280787
778	0.20865	0.168482	0.28096
779	0.207612	0.167555	0.279841
780	0.207911	0.16606	0.280008
781	0.207279	0.166047	0.281987
782	0.207316	0.167165	0.281644
783	0.206488	0.167105	0.282835
784	0.206699	0.166363	0.287139
785	0.208159	0.164502	0.289732
786	0.207299	0.164389	0.287714
787	0.205028	0.162864	0.28794
788	0.204112	0.161625	0.289985
789	0.203308	0.162674	0.286194
790	0.203341	0.16276	0.285047
791	0.203144	0.161675	0.284654
792	0.204278	0.159892	0.286076
793	0.205742	0.163	0.283149
794	0.206143	0.162944	0.285149
795	0.202826	0.162499	0.285544
796	0.203412	0.161341	0.28615
797	0.202633	0.161713	0.285587
798	0.202591	0.160252	0.287439
799	0.202567	0.159316	0.287635
800	0.203724	0.160228	0.285774
801	0.203873	0.163452	0.287297
802	0.203104	0.166953	0.288091
803	0.202353	0.167921	0.285235
804	0.200211	0.167655	0.284371
805	0.198944	0.168138	0.284335
806	0.198149	0.169762	0.283668
807	0.20028	0.167429	0.281727
808	0.200579	0.164725	0.281343
809	0.200528	0.164924	0.280054
810	0.201494	0.164756	0.28021
811	0.201284	0.160632	0.280159
812	0.199786	0.159435	0.277044
813	0.198618	0.160337	0.272199
814	0.200114	0.161172	0.270386
815	0.200008	0.158971	0.270276
816	0.199554	0.158124	0.271829
817	0.198961	0.159162	0.275172
818	0.198334	0.158495	0.277843
819	0.197622	0.155924	0.275837
820	0.196749	0.155235	0.274972
821	0.197392	0.155446	0.2728
822	0.196545	0.153293	0.271908
823	0.196975	0.152972	0.272718
824	0.195325	0.155115	0.274337
825	0.195547	0.15437	0.276012
826	0.195468	0.155699	0.273539
827	0.19612	0.158913	0.273417
828	0.195063	0.161364	0.274889
829	0.197153	0.158932	0.275515
830	0.196854	0.16046	0.276035
831	0.197492	0.160244	0.278198
832	0.196504	0.156092	0.279066
833	0.196352	0.153426	0.279147
834	0.19594	0.154092	0.282985
835	0.196167	0.156095	0.280217
836	0.195351	0.156814	0.279906
837	0.196475	0.159424	0.27884
838	0.196949	0.160235	0.276516
839	0.19539	0.159237	0.273819
840	0.195399	0.158707	0.273107
841	0.194673	0.156437	0.275668
842	0.195532	0.156703	0.275809
843	0.196184	0.158745	0.279092
844	0.198973	0.164669	0.281288
845	0.20052	0.166005	0.284982
846	0.201106	0.170575	0.280198
847	0.200668	0.175123	0.278927
848	0.197796	0.175486	0.277845
849	0.19673	0.174614	0.277163
850	0.196078	0.175607	0.275676
851	0.195775	0.175827	0.279174
852	0.19515	0.17455	0.282158
853	0.196305	0.175645	0.285287
854	0.195303	0.17608	0.286317
855	0.194496	0.176988	0.293474
856	0.194562	0.178776	0.297172
857	0.194303	0.178659	0.296794
858	0.194516	0.180727	0.296799
859	0.193467	0.183075	0.298619
860	0.192386	0.180815	0.295032
861	0.19167	0.178329	0.297869
862	0.190649	0.177802	0.297703
863	0.190775	0.1751	0.299451
864	0.190008	0.172463	0.297376
865	0.189583	0.17341	0.299904
866	0.189521	0.172065	0.298019
867	0.189473	0.171919	0.30336
868	0.187455	0.169828	0.304661
869	0.187872	0.166856	0.309674
870	0.186898	0.167369	0.307863
871	0.185409	0.168382	0.308402
872	0.183884	0.167028	0.305697
873	0.185232	0.167889	0.305833
874	0.185121	0.168285	0.300044
875	0.184871	0.167982	0.303292
876	0.184848	0.16574	0.301166
877	0.184701	0.164877	0.301901
878	0.184215	0.163643	0.302365
879	0.184373	0.165191	0.30627
880	0.185531	0.16435	0.302247
881	0.185833	0.164102	0.300884
882	0.18647	0.161872	0.300658
883	0.185315	0.16095	0.296277
884	0.183602	0.159484	0.29802
885	0.182505	0.158434	0.302603
886	0.182997	0.159048	0.306578
887	0.183739	0.162306	0.30914
888	0.184724	0.163239	0.31153
889	0.187913	0.162423	0.307332
890	0.189111	0.161725	0.304163
891	0.189289	0.159388	0.302387
892	0.190552	0.156827	0.297774
893	0.191584	0.154284	0.295134
894	0.193148	0.153772	0.295103
895	0.196165	0.155568	0.291516
896	0.196304	0.154851	0.288454
897	0.195159	0.154414	0.28559
898	0.196169	0.154894	0.284164
899	0.196012	0.154812	0.283399
900	0.193837	0.151069	0.28146
901	0.194656	0.153044	0.277938
902	0.197409	0.1527	0.278709
903	0.197757	0.15397	0.277223
904	0.196897	0.153887	0.27695
905	0.19828	0.153545	0.277924
906	0.198202	0.1521	0.279542
907	0.1983	0.153635	0.278753
908	0.198497	0.154683	0.275429
909	0.199214	0.156736	0.272349
910	0.198421	0.159777	0.270848
911	0.200227	0.162574	0.26905
912	0.199011	0.164024	0.270032
913	0.200624	0.163401	0.272797
914	0.200327	0.161783	0.268842
915	0.200174	0.16042	0.265953
916	0.199179	0.159433	0.266181
917	0.201582	0.155881	0.26404
918	0.200227	0.157769	0.261114
919	0.2014	0.157864	0.262233
920	0.2034	0.158804	0.262014
921	0.205374	0.159077	0.26274
922	0.204708	0.159143	0.261012
923	0.2052	0.157037	0.263027
924	0.205605	0.157945	0.262024
925	0.204533	0.157761	0.259886
926	0.204118	0.155327	0.25837
927	0.202919	0.157745	0.257422
928	0.201722	0.157422	0.256473
929	0.201202	0.155717	0.261694
930	0.202007	0.157062	0.265935
931	0.199913	0.161723	0.264167
932	0.200042	0.163357	0.266821
933	0.201432	0.165616	0.267582
934	0.200056	0.171805	0.264527
935	0.197106	0.172636	0.266431
936	0.196736	0.175355	0.269328
937	0.19544	0.18085	0.268132
938	0.19266	0.181994	0.265159
939	0.191522	0.178841	0.265735
940	0.192554	0.18226	0.262278
941	0.191824	0.180088	0.260532
942	0.19178	0.177904	0.258825
943	0.192123	0.178198	0.262204
944	0.190837	0.17954	0.262987
945	0.191218	0.176952	0.263023
946	0.191963	0.177909	0.262807
947	0.191956	0.174055	0.262655
948	0.19181	0.171735	0.259363
949	0.192406	0.168857	0.259859
950	0.191988	0.166018	0.259814
951	0.191935	0.162624	0.262948
952	0.192921	0.161383	0.268568
953	0.192811	0.158404	0.271944
954	0.194473	0.157347	0.271245
955	0.194237	0.15875	0.27419
956	0.194266	0.15586	0.27229
957	0.192834	0.156927	0.268467
958	0.194358	0.158636	0.265219
959	0.194043	0.158018	0.262298
960	0.193519	0.15631	0.25914
961	0.193738	0.155814	0.258222
962	0.194004	0.152962	0.257651
963	0.193189	0.152914	0.256922
964	0.191736	0.153902	0.257155
965	0.191845	0.152939	0.25643
966	0.190774	0.155168	0.255013
967	0.189933	0.155737	0.254621
968	0.189416	0.156359	0.257583
969	0.189424	0.154971	0.257493
970	0.189009	0.151532	0.257032
971	0.188484	0.151255	0.257098
972	0.189879	0.149461	0.259202
973	0.189997	0.148056	0.258677
974	0.190697	0.146267	0.258872
975	0.190814	0.150659	0.260708
976	0.189775	0.14991	0.260436
977	0.187898	0.152118	0.259767
978	0.186756	0.151084	0.260188
979	0.184627	0.151558	0.262719
980	0.183305	0.151024	0.265057
981	0.184272	0.151029	0.267459
982	0.182746	0.149945	0.271138
983	0.18184	0.150802	0.27042
984	0.182462	0.150386	0.272692
985	0.182404	0.148832	0.272496
986	0.181545	0.147815	0.271203
987	0.182266	0.146425	0.267791
988	0.182835	0.146115	0.269894
989	0.182733	0.145099	0.266443
990	0.183013	0.1454	0.267989
991	0.182834	0.144574	0.269435
992	0.18332	0.144347	0.272462
993	0.182693	0.143144	0.272405
994	0.182155	0.145856	0.276785
995	0.182354	0.142401	0.277305
996	0.181185	0.1447	0.276809
997	0.180928	0.145249	0.273165
998	0.182434	0.146092	0.273514
999	0.18536	0.144877	0.2703
1000	0.185081	0.14699	0.267843
1001	0.186734	0.145495	0.270618
1002	0.187829	0.146265	0.274945
1003	0.187469	0.144971	0.27923
1004	0.185494	0.143913	0.281026
1005	0.184616	0.145132	0.284792
1006	0.184022	0.146108	0.286767
1007	0.182972	0.14583	0.286247
1008	0.182211	0.14991	0.285721
1009	0.182624	0.152334	0.287668
1010	0.183533	0.152191	0.285523
1011	0.184662	0.151657	0.28732
1012	0.184454	0.153298	0.28892
1013	0.185941	0.149334	0.288145
1014	0.186029	0.14744	0.288498
1015	0.186429	0.148343	0.288052
1016	0.186575	0.147687	0.288044
1017	0.188706	0.146723	0.287592
1018	0.188166	0.147769	0.289891
1019	0.189286	0.14792	0.291776
1020	0.191001	0.146736	0.297366
1021	0.191227	0.145939	0.293947
1022	0.191902	0.14487	0.295463
1023	0.192772	0.14317	0.291906
1024	0.19279	0.145215	0.288401
1025	0.192787	0.145899	0.284194
1026	0.193644	0.147794	0.285911
1027	0.192872	0.147795	0.290132
1028	0.193373	0.148779	0.294133
1029	0.193782	0.146686	0.295442
1030	0.193136	0.143928	0.297273
1031	0.193941	0.144367	0.295824
1032	0.192936	0.145231	0.290429
1033	0.192354	0.147329	0.285151
1034	0.191013	0.149115	0.284104
1035	0.191648	0.151334	0.286457
1036	0.191618	0.151106	0.287499
1037	0.191782	0.14865	0.284287
1038	0.191635	0.148222	0.286517
1039	0.19304	0.146604	0.284326
1040	0.192296	0.146173	0.277518
1041	0.190402	0.147298	0.276667
1042	0.191107	0.15141	0.27431
1043	0.191267	0.151848	0.270683
1044	0.189904	0.154439	0.271391
1045	0.191252	0.15824	0.269996
1046	0.19206	0.15942	0.264068
1047	0.192778	0.159185	0.262933
1048	0.192367	0.160597	0.262866
1049	0.193834	0.161116	0.263378
1050	0.192134	0.159355	0.264532
1051	0.19071	0.156593	0.263986
1052	0.188929	0.157533	0.26682
1053	0.188919	0.158144	0.265501
1054	0.186995	0.159783	0.260316
1055	0.187372	0.163464	0.257531
1056	0.186762	0.165274	0.259958
1057	0.185559	0.167655	0.258161
1058	0.182775	0.167915	0.255688
1059	0.181748	0.165282	0.259166
1060	0.180014	0.164611	0.259751
1061	0.18056	0.166869	0.256175
1062	0.181479	0.165663	0.255572
1063	0.182685	0.165902	0.258197
1064	0.183391	0.166782	0.254051
1065	0.182768	0.167173	0.25253
1066	0.182281	0.166868	0.252914
1067	0.181341	0.168481	0.249958
1068	0.18039	0.16509	0.248716
1069	0.18064	0.165718	0.246521
1070	0.180903	0.162296	0.246423
1071	0.179721	0.162306	0.248632
1072	0.180199	0.160003	0.25072
1073	0.182021	0.162947	0.250444
1074	0.181118	0.164498	0.254071
1075	0.181354	0.164619	0.252044
1076	0.182654	0.164347	0.250511
1077	0.183254	0.164044	0.250138
1078	0.182064	0.162433	0.250228
1079	0.183645	0.161242	0.25146
1080	0.185177	0.163746	0.255564
1081	0.186689	0.161218	0.254012
1082	0.185488	0.161313	0.254223
1083	0.187266	0.162873	0.250801
1084	0.189067	0.160274	0.249136
1085	0.18931	0.160044	0.247754
1086	0.188945	0.163237	0.250586
1087	0.191252	0.164283	0.250198
1088	0.191882	0.164637	0.254275
1089	0.190261	0.165034	0.249494
1090	0.19141	0.16503	0.245942
1091	0.192627	0.165548	0.243181
1092	0.192334	0.165762	0.241309
1093	0.192773	0.163248	0.238048
1094	0.192888	0.164995	0.241847
1095	0.190428	0.159935	0.244477
1096	0.187892	0.158094	0.246009
1097	0.1876	0.158059	0.245249
1098	0.185416	0.160048	0.244541
1099	0.184476	0.157387	0.241133
1100	0.183032	0.16264	0.240902
1101	0.182593	0.162862	0.240514
1102	0.181837	0.163136	0.239696
1103	0.182102	0.164481	0.242098
1104	0.18198	0.166109	0.244025
1105	0.18227	0.168557	0.244051
1106	0.184091	0.170062	0.242632
1107	0.183979	0.170893	0.244045
1108	0.183861	0.173143	0.24388
1109	0.184046	0.175702	0.244474
1110	0.185674	0.176521	0.246426
1111	0.184876	0.18067	0.246826
1112	0.185738	0.181789	0.247769
1113	0.185405	0.180132	0.249324
1114	0.184215	0.182203	0.252966
1115	0.183757	0.180902	0.252538
1116	0.183607	0.179424	0.252676
1117	0.180761	0.179161	0.251754
1118	0.180816	0.180083	0.25127
1119	0.17998	0.180604	0.244905
1120	0.179528	0.180945	0.244161
1121	0.179199	0.180469	0.248073
1122	0.180405	0.183999	0.247016
1123	0.180294	0.184412	0.24531
1124	0.181936	0.183235	0.246813
1125	0.18091	0.184011	0.249381
1126	0.17956	0.183839	0.245586
1127	0.179795	0.182584	0.248802
1128	0.180005	0.182427	0.249347
1129	0.179528	0.182688	0.251645
1130	0.179095	0.178277	0.249873
1131	0.179007	0.174275	0.250677
1132	0.178362	0.173192	0.252438
1133	0.177098	0.171685	0.250533
1134	0.177331	0.172289	0.250574
1135	0.178009	0.172398	0.250565
1136	0.179843	0.174896	0.252063
1137	0.181059	0.172793	0.252608
1138	0.181523	0.173249	0.255133
1139	0.181723	0.170665	0.251297
1140	0.181612	0.173405	0.248463
1141	0.181956	0.171784	0.24829
1142	0.180508	0.170278	0.247347
1143	0.180835	0.16892	0.246415
1144	0.179772	0.167413	0.2481
1145	0.180275	0.165729	0.25199
1146	0.179372	0.16335	0.253746
1147	0.180126	0.163602	0.25123
1148	0.180275	0.16343	0.252879
1149	0.180495	0.162146	0.255805
1150	0.17925	0.159769	0.251663
1151	0.180028	0.159096	0.24967
1152	0.181102	0.157771	0.253115
1153	0.180676	0.156144	0.247333
1154	0.180534	0.154033	0.248421
1155	0.181635	0.151552	0.24997
1156	0.181255	0.154676	0.253771
1157	0.181698	0.155204	0.250739
1158	0.182914	0.154341	0.256819
1159	0.182952	0.156681	0.256993
1160	0.183048	0.160198	0.260469
1161	0.183298	0.157128	0.256244
1162	0.182218	0.15673	0.255265
1163	0.181675	0.156966	0.253447
1164	0.183252	0.158612	0.25047
1165	0.184534	0.157351	0.249569
1166	0.185166	0.159283	0.248839
1167	0.186141	0.160587	0.250904
1168	0.185664	0.165775	0.255174
1169	0.184766	0.165398	0.258165
1170	0.184664	0.168375	0.25786
1171	0.183326	0.170442	0.257685
1172	0.183963	0.171671	0.258019
1173	0.185484	0.171394	0.254745
1174	0.185798	0.175478	0.253959
1175	0.187156	0.17686	0.250073
1176	0.18726	0.177345	0.250299
1177	0.186471	0.177351	0.249388
1178	0.184885	0.178017	0.249619
1179	0.185816	0.17849	0.248837
1180	0.184525	0.177658	0.251701
1181	0.186278	0.177606	0.253524
1182	0.18633	0.178252	0.250745
1183	0.188646	0.179049	0.250443
1184	0.18798	0.177116	0.250011
1185	0.188031	0.177085	0.244714
1186	0.186677	0.176951	0.242054
1187	0.187012	0.175549	0.245018
1188	0.186246	0.172448	0.245686
1189	0.186825	0.170816	0.24177
1190	0.185906	0.170811	0.244595
1191	0.186515	0.171619	0.246699
1192	0.186659	0.171142	0.244257
1193	0.186273	0.171399	0.240617
1194	0.184764	0.171189	0.243985
1195	0.186118	0.173217	0.244362
1196	0.187004	0.174812	0.243801
1197	0.187849	0.176611	0.243867
1198	0.189586	0.17796	0.24493
1199	0.190544	0.181452	0.242588
1200	0.192338	0.179532	0.246605
1201	0.192425	0.176037	0.244734
1202	0.192246	0.175643	0.245079
1203	0.191422	0.173906	0.244751
1204	0.192545	0.175143	0.244997
1205	0.191331	0.177696	0.241229
1206	0.191229	0.178035	0.241406
1207	0.191018	0.180729	0.240361
1208	0.191983	0.180572	0.240604
1209	0.192512	0.176196	0.239873
1210	0.192693	0.176331	0.241877
1211	0.192471	0.179405	0.240727
1212	0.192433	0.1769	0.241629
1213	0.191058	0.180385	0.239107
1214	0.19138	0.181	0.241066
1215	0.191266	0.177217	0.235143
1216	0.190356	0.175431	0.23463
1217	0.189594	0.175702	0.235753
1218	0.188467	0.172744	0.238882
1219	0.18763	0.174881	0.238314
1220	0.187652	0.179752	0.240295
1221	0.189034	0.183383	0.239792
1222	0.18968	0.182145	0.234834
1223	0.191437	0.184994	0.23159
1224	0.19114	0.186464	0.232178
1225	0.192512	0.184922	0.23118
1226	0.192956	0.185038	0.230597
1227	0.192577	0.188402	0.234103
1228	0.192234	0.18655	0.234993
1229	0.192474	0.184974	0.231646
1230	0.191647	0.182749	0.234255
1231	0.191084	0.17873	0.234049
1232	0.191781	0.175748	0.231528
1233	0.19019	0.17604	0.230699
1234	0.189176	0.177773	0.231622
1235	0.19	0.176245	0.229848
1236	0.189746	0.176883	0.231329
1237	0.18995	0.177824	0.233189
1238	0.190942	0.17585	0.231708
1239	0.19213	0.171186	0.23043
1240	0.19125	0.172364	0.229517
1241	0.191063	0.170181	0.226372
1242	0.189972	0.166925	0.226669
1243	0.190459	0.167519	0.230306
1244	0.189135	0.168784	0.232144
1245	0.188857	0.168633	0.233565
1246	0.188523	0.169394	0.234616
1247	0.188404	0.16988	0.232643
1248	0.187704	0.169936	0.22979
1249	0.188245	0.168892	0.227396
1250	0.186234	0.168943	0.223414
1251	0.187528	0.170381	0.225333
1252	0.18765	0.172142	0.224852
1253	0.187689	0.172006	0.225321
1254	0.188673	0.174502	0.225992
1255	0.187553	0.174481	0.227768
1256	0.186241	0.173426	0.226672
1257	0.18568	0.172505	0.227133
1258	0.186541	0.169524	0.223888
1259	0.185599	0.165977	0.224054
1260	0.186741	0.165381	0.22451
1261	0.187145	0.163852	0.223551
1262	0.187751	0.160313	0.220542
1263	0.187519	0.16452	0.221687
1264	0.187696	0.165887	0.219987
1265	0.188763	0.162101	0.219208
1266	0.189947	0.159815	0.217913
1267	0.190536	0.16227	0.222375
1268	0.190285	0.158809	0.226201
1269	0.190654	0.157595	0.22524
1270	0.192588	0.156754	0.225921
1271	0.192439	0.155903	0.226403
1272	0.192269	0.152852	0.222951
1273	0.192198	0.153161	0.219203
1274	0.191776	0.152408	0.219041
1275	0.189857	0.153877	0.21688
1276	0.188904	0.154041	0.215775
1277	0.187056	0.155094	0.217923
1278	0.186787	0.153535	0.22017
1279	0.18639	0.152401	0.222106
1280	0.187037	0.153881	0.224866
1281	0.186204	0.154013	0.225269
1282	0.18732	0.154704	0.223895
1283	0.189385	0.154445	0.220979
1284	0.189705	0.152947	0.222327
1285	0.188277	0.150155	0.220098
1286	0.188198	0.151138	0.222616
1287	0.189331	0.150644	0.220983
1288	0.187832	0.15178	0.220707
1289	0.187264	0.155287	0.21866
1290	0.188537	0.16046	0.218907
1291	0.188853	0.162089	0.216607
1292	0.186974	0.16419	0.219699
1293	0.187796	0.165906	0.221058
1294	0.189927	0.168668	0.220424
1295	0.190583	0.16686	0.221823
1296	0.191635	0.166886	0.218928
1297	0.193488	0.166292	0.215201
1298	0.193448	0.163758	0.213049
1299	0.191609	0.162916	0.211748
1300	0.191157	0.163359	0.208595

## Sheet: graph
Figure2B
Fluctuation-positive cells(%)			Fluctuation amplitude (ΔF340/F380)
Vehicle	KT5823		Vehicle	KT5823
80	63.3333		0.0706558	0.0431763
63.3333	53.3333		0.0768641	0.0574797
86.6667	60		0.0614718	0.0333551
70	53.3333		0.0662866	0.036358
70	53.3333		0.0797127	0.0388595
50	43.3333		0.0576929	0.0326527
76.6667	60		0.0788818	0.0455928
