# Supplementary material for: C-type natriuretic peptide facilitates autonomic Ca2+ entry in growth plate chondrocytes for stimulating bone growth
Source: eLife. 2022 Mar 15;11:e71931. doi: 10.7554/eLife.71931 (PMC8923661; doi:10.7554/eLife.71931)
Supplement: Figure 3—figure supplement 1—source data 1. [file elife-71931-fig3-figsupp1-data1.xlsx]

## Sheet: trace
Figure 3-figure supplement 1
U73122 (10 mM)
Vehicle					CNP (300 nM)
Times (s)	Cell1	Cell2	Cell3		Times (s)	Cell1	Cell2	Cell3
0	0.219491	0.204524	0.200379		0	0.263385	0.290699	0.226267
1	0.220021	0.203796	0.20091		1	0.262496	0.289622	0.226213
2	0.220537	0.203298	0.19946		2	0.262927	0.287964	0.223795
3	0.221329	0.204148	0.198361		3	0.263622	0.288671	0.222849
4	0.222747	0.206534	0.196929		4	0.264853	0.287918	0.224414
5	0.225691	0.207074	0.197068		5	0.26518	0.288311	0.224226
6	0.228524	0.209531	0.198104		6	0.265679	0.287092	0.223559
7	0.23017	0.212277	0.198787		7	0.265467	0.290473	0.224739
8	0.231255	0.213971	0.198727		8	0.266216	0.290159	0.226395
9	0.232155	0.214791	0.200132		9	0.265181	0.291759	0.226443
10	0.233546	0.21642	0.200649		10	0.265635	0.29373	0.224739
11	0.23522	0.217272	0.200572		11	0.266002	0.294698	0.224978
12	0.236222	0.218251	0.201056		12	0.267106	0.290916	0.226583
13	0.238857	0.217776	0.20149		13	0.266156	0.290248	0.226806
14	0.239575	0.217956	0.201506		14	0.265485	0.289797	0.226217
15	0.237029	0.216585	0.200959		15	0.264337	0.288917	0.229266
16	0.235548	0.216049	0.199494		16	0.262462	0.289599	0.227339
17	0.234378	0.21592	0.20074		17	0.26028	0.291511	0.227521
18	0.229836	0.216233	0.199277		18	0.262019	0.293233	0.226046
19	0.227404	0.218309	0.19938		19	0.263077	0.292598	0.225412
20	0.23016	0.217805	0.199027		20	0.262871	0.29141	0.225638
21	0.229421	0.218734	0.198799		21	0.26263	0.292101	0.227624
22	0.22924	0.218891	0.196136		22	0.262902	0.29396	0.228309
23	0.230108	0.219829	0.197765		23	0.261192	0.295558	0.230109
24	0.231461	0.220084	0.198611		24	0.260208	0.299502	0.233924
25	0.229255	0.223036	0.200588		25	0.259541	0.299897	0.233181
26	0.226374	0.223179	0.20095		26	0.260314	0.303312	0.234351
27	0.225171	0.22285	0.203295		27	0.259985	0.305574	0.235828
28	0.223914	0.223001	0.202167		28	0.260301	0.307546	0.234909
29	0.222169	0.224039	0.200877		29	0.259815	0.307951	0.233801
30	0.222031	0.224518	0.200967		30	0.260402	0.310327	0.235069
31	0.222932	0.224537	0.201962		31	0.260452	0.309738	0.236459
32	0.22128	0.224773	0.201543		32	0.259828	0.311599	0.235231
33	0.220791	0.224116	0.203104		33	0.257715	0.314193	0.238292
34	0.221305	0.220346	0.204532		34	0.257704	0.313568	0.237362
35	0.220094	0.217795	0.203362		35	0.258359	0.317752	0.237951
36	0.220994	0.21641	0.204421		36	0.257185	0.319531	0.238192
37	0.221743	0.218407	0.20651		37	0.25768	0.320908	0.238761
38	0.222973	0.220649	0.205188		38	0.258245	0.320024	0.236986
39	0.222041	0.222626	0.205828		39	0.258601	0.324361	0.236002
40	0.220406	0.224	0.206418		40	0.25727	0.323447	0.234815
41	0.216171	0.224882	0.20573		41	0.259802	0.32676	0.231117
42	0.215489	0.22394	0.203653		42	0.259883	0.328717	0.232544
43	0.212406	0.222905	0.204981		43	0.261107	0.329735	0.233603
44	0.211611	0.223015	0.203557		44	0.262564	0.332799	0.233375
45	0.212349	0.222325	0.203584		45	0.264101	0.33882	0.233679
46	0.215592	0.222769	0.203523		46	0.264076	0.339392	0.235932
47	0.214234	0.221038	0.203797		47	0.268138	0.343413	0.234057
48	0.216663	0.22002	0.203273		48	0.269468	0.348085	0.230875
49	0.215281	0.221709	0.203131		49	0.27053	0.348483	0.231684
50	0.213677	0.223028	0.20352		50	0.274719	0.346295	0.23023
51	0.213436	0.222043	0.202339		51	0.275957	0.346016	0.229197
52	0.21392	0.225432	0.200934		52	0.277233	0.344514	0.227409
53	0.212507	0.227247	0.199917		53	0.280662	0.342675	0.228186
54	0.213073	0.22726	0.20064		54	0.282154	0.342283	0.227353
55	0.216535	0.226859	0.199905		55	0.282174	0.344198	0.228724
56	0.215612	0.226471	0.200172		56	0.284315	0.343764	0.228377
57	0.217404	0.223935	0.201427		57	0.283396	0.342527	0.2283
58	0.217238	0.22241	0.201495		58	0.283037	0.342323	0.228195
59	0.218767	0.219942	0.200339		59	0.284298	0.339005	0.227963
60	0.218264	0.219447	0.199493		60	0.284867	0.335153	0.225718
61	0.217972	0.220844	0.200095		61	0.285737	0.336643	0.226564
62	0.217579	0.221959	0.197901		62	0.287091	0.33642	0.224765
63	0.216904	0.221982	0.198661		63	0.286709	0.337862	0.225824
64	0.216516	0.222888	0.200932		64	0.287131	0.343151	0.226457
65	0.212858	0.22177	0.201115		65	0.286648	0.345906	0.227172
66	0.213355	0.221639	0.200133		66	0.285908	0.34753	0.224289
67	0.212503	0.219208	0.202145		67	0.284679	0.348571	0.226289
68	0.213784	0.220212	0.20352		68	0.283979	0.347112	0.224698
69	0.2129	0.219587	0.200522		69	0.2832	0.346367	0.22454
70	0.213454	0.221149	0.201724		70	0.28059	0.348912	0.22501
71	0.212395	0.221259	0.200989		71	0.280541	0.350334	0.226449
72	0.212821	0.221099	0.200214		72	0.281442	0.355571	0.228935
73	0.213192	0.217387	0.198519		73	0.280894	0.359024	0.230218
74	0.211629	0.216592	0.198562		74	0.282258	0.363178	0.229556
75	0.21326	0.213951	0.197105		75	0.28457	0.364371	0.22926
76	0.213397	0.211859	0.198334		76	0.283491	0.362835	0.230981
77	0.210755	0.210994	0.199447		77	0.282693	0.359933	0.229295
78	0.208781	0.211769	0.200134		78	0.283708	0.360741	0.228334
79	0.210989	0.209651	0.201603		79	0.281206	0.358013	0.230202
80	0.208801	0.210951	0.201317		80	0.277837	0.358317	0.230771
81	0.206144	0.210368	0.20127		81	0.277569	0.359158	0.227617
82	0.208097	0.210642	0.198191		82	0.276649	0.357793	0.225412
83	0.207919	0.210363	0.197741		83	0.274688	0.358299	0.225868
84	0.205969	0.210562	0.197622		84	0.274245	0.360616	0.223358
85	0.204878	0.208034	0.198008		85	0.275744	0.358214	0.221844
86	0.206628	0.207746	0.197088		86	0.275953	0.358752	0.222505
87	0.205185	0.207087	0.200271		87	0.275617	0.360544	0.223316
88	0.20435	0.206456	0.199729		88	0.277055	0.357323	0.222734
89	0.20535	0.20677	0.199227		89	0.276336	0.355614	0.22288
90	0.207264	0.207369	0.200021		90	0.276311	0.357535	0.226849
91	0.206899	0.206668	0.200877		91	0.276117	0.355816	0.230053
92	0.207229	0.20511	0.200387		92	0.277338	0.354915	0.231087
93	0.2062	0.206075	0.201594		93	0.277581	0.356796	0.232743
94	0.202346	0.204988	0.201828		94	0.280726	0.353592	0.236165
95	0.199706	0.204203	0.201589		95	0.281807	0.352059	0.234571
96	0.198821	0.204383	0.19987		96	0.28199	0.354255	0.232268
97	0.199228	0.204576	0.198081		97	0.282907	0.354513	0.23369
98	0.199691	0.204752	0.197294		98	0.283576	0.351636	0.234147
99	0.203117	0.204503	0.196382		99	0.28269	0.35306	0.232263
100	0.204114	0.205109	0.194313		100	0.283143	0.353095	0.232539
101	0.202629	0.204918	0.195505		101	0.283143	0.350707	0.235079
102	0.20013	0.2054	0.195989		102	0.281947	0.349663	0.234497
103	0.199022	0.203196	0.197012		103	0.280621	0.351239	0.234706
104	0.194695	0.20284	0.197051		104	0.280566	0.351265	0.236602
105	0.193647	0.20121	0.197334		105	0.279723	0.350237	0.238465
106	0.193247	0.200293	0.195934		106	0.279497	0.349657	0.239114
107	0.192948	0.199103	0.195088		107	0.278666	0.348941	0.242405
108	0.193927	0.198227	0.193834		108	0.278745	0.34848	0.242319
109	0.194729	0.198936	0.194214		109	0.27698	0.34715	0.243387
110	0.19355	0.199315	0.193962		110	0.278073	0.347072	0.242371
111	0.193902	0.202068	0.195668		111	0.278162	0.345403	0.240023
112	0.194923	0.202783	0.196283		112	0.280663	0.343641	0.238057
113	0.192676	0.203774	0.195565		113	0.282162	0.341049	0.238852
114	0.191467	0.204544	0.195871		114	0.285413	0.341883	0.23904
115	0.191585	0.20457	0.197527		115	0.286793	0.341151	0.239751
116	0.193187	0.202404	0.197546		116	0.287782	0.340895	0.240951
117	0.191892	0.20465	0.196364		117	0.286959	0.341092	0.242194
118	0.192362	0.206827	0.195367		118	0.284477	0.340056	0.241131
119	0.192491	0.206669	0.195852		119	0.282365	0.335738	0.240885
120	0.19194	0.208303	0.194775		120	0.278015	0.332975	0.240442
121	0.191295	0.210043	0.19345		121	0.276344	0.329763	0.241724
122	0.190076	0.210832	0.193518		122	0.274999	0.326383	0.240855
123	0.189513	0.209144	0.19561		123	0.276628	0.324972	0.243474
124	0.191701	0.208451	0.194599		124	0.275172	0.326711	0.244279
125	0.191984	0.208381	0.196701		125	0.276055	0.325063	0.244004
126	0.191788	0.208388	0.197513		126	0.274515	0.327102	0.243994
127	0.195461	0.205142	0.19874		127	0.272398	0.328696	0.24264
128	0.196539	0.206548	0.198712		128	0.271318	0.328497	0.241156
129	0.197187	0.20758	0.199813		129	0.27204	0.32552	0.240806
130	0.200705	0.208978	0.199719		130	0.271613	0.325997	0.242747
131	0.200836	0.209272	0.201859		131	0.272419	0.325049	0.242896
132	0.200933	0.211175	0.207224		132	0.272563	0.322894	0.244747
133	0.20466	0.213688	0.209493		133	0.272295	0.323433	0.24726
134	0.209104	0.214451	0.212049		134	0.271723	0.32109	0.247738
135	0.210914	0.213603	0.21335		135	0.271915	0.318904	0.24887
136	0.214182	0.21472	0.215207		136	0.271811	0.315566	0.25112
137	0.216484	0.216571	0.212882		137	0.273029	0.311395	0.253377
138	0.219206	0.215673	0.214695		138	0.273624	0.308495	0.253139
139	0.219959	0.215915	0.21551		139	0.274695	0.305677	0.254842
140	0.223392	0.217302	0.215625		140	0.275419	0.304965	0.253073
141	0.225554	0.21806	0.215778		141	0.279334	0.302623	0.25494
142	0.230641	0.217453	0.219522		142	0.280006	0.302919	0.255388
143	0.233669	0.217957	0.220348		143	0.282134	0.300667	0.255561
144	0.235828	0.219493	0.220922		144	0.282573	0.300978	0.256076
145	0.236549	0.220618	0.223294		145	0.284962	0.298461	0.258701
146	0.239213	0.220564	0.225481		146	0.28358	0.298492	0.256956
147	0.238802	0.223193	0.223809		147	0.284552	0.298924	0.259231
148	0.239502	0.224718	0.22492		148	0.284034	0.296909	0.259435
149	0.240207	0.228895	0.226799		149	0.286054	0.295914	0.260638
150	0.243397	0.232715	0.227554		150	0.285755	0.294129	0.263212
151	0.246573	0.23725	0.229276		151	0.287142	0.293045	0.264114
152	0.246942	0.240343	0.230779		152	0.289855	0.291606	0.264442
153	0.247558	0.241049	0.231459		153	0.290546	0.291692	0.267893
154	0.245072	0.242296	0.232332		154	0.290867	0.290015	0.26783
155	0.245197	0.243048	0.233297		155	0.291794	0.292316	0.264968
156	0.244405	0.242169	0.230728		156	0.293185	0.292628	0.26559
157	0.2458	0.242706	0.229601		157	0.293466	0.294553	0.263868
158	0.245898	0.246481	0.229563		158	0.2926	0.296616	0.26381
159	0.250449	0.246839	0.228088		159	0.293526	0.299536	0.264782
160	0.250851	0.246088	0.226513		160	0.290799	0.298678	0.268718
161	0.250857	0.247531	0.226207		161	0.288328	0.298267	0.270132
162	0.250026	0.250434	0.228348		162	0.285598	0.297127	0.272955
163	0.252453	0.253881	0.224606		163	0.284517	0.295142	0.27293
164	0.25155	0.256602	0.223977		164	0.279944	0.294318	0.275857
165	0.251983	0.25961	0.224111		165	0.278126	0.294411	0.275292
166	0.250129	0.26494	0.225004		166	0.276167	0.295982	0.275012
167	0.251058	0.266115	0.22328		167	0.272896	0.296333	0.273717
168	0.249161	0.264875	0.222676		168	0.271619	0.298951	0.273458
169	0.248851	0.265081	0.220822		169	0.269212	0.300636	0.270298
170	0.246866	0.264482	0.219253		170	0.268854	0.300867	0.269655
171	0.248783	0.262768	0.218442		171	0.267312	0.300476	0.269128
172	0.247523	0.260941	0.217173		172	0.264116	0.299408	0.266903
173	0.246284	0.262299	0.219277		173	0.260255	0.297877	0.267982
174	0.245595	0.26043	0.219739		174	0.257066	0.294079	0.267189
175	0.244753	0.262465	0.219426		175	0.252787	0.294933	0.265244
176	0.242828	0.260385	0.21849		176	0.249969	0.293061	0.262737
177	0.24233	0.2603	0.217498		177	0.248851	0.291555	0.265416
178	0.241428	0.257782	0.216217		178	0.246798	0.291475	0.263897
179	0.242533	0.257732	0.217749		179	0.245838	0.292016	0.263624
180	0.242204	0.255422	0.217978		180	0.245876	0.289891	0.261989
181	0.241087	0.256489	0.216799		181	0.242406	0.290328	0.262667
182	0.239829	0.254808	0.217048		182	0.24214	0.289259	0.260239
183	0.239071	0.25432	0.21569		183	0.240765	0.289307	0.25763
184	0.237487	0.252634	0.214044		184	0.239649	0.288757	0.254911
185	0.236613	0.252113	0.212709		185	0.236889	0.289316	0.256567
186	0.237411	0.246602	0.213032		186	0.236577	0.28941	0.254676
187	0.238503	0.246653	0.21481		187	0.232365	0.290362	0.253111
188	0.238014	0.243538	0.216504		188	0.231436	0.288212	0.254612
189	0.23462	0.243932	0.215614		189	0.228995	0.289679	0.258827
190	0.233394	0.243826	0.215787		190	0.228536	0.288511	0.259308
191	0.230739	0.2479	0.217919		191	0.226611	0.287169	0.261339
192	0.226379	0.24562	0.217906		192	0.224796	0.287477	0.262075
193	0.225684	0.248323	0.21607		193	0.222441	0.286977	0.260099
194	0.226601	0.247407	0.217144		194	0.221671	0.286081	0.258344
195	0.223278	0.246554	0.217061		195	0.219263	0.285767	0.257562
196	0.223882	0.245437	0.216343		196	0.216883	0.28628	0.258577
197	0.223568	0.24691	0.214792		197	0.217449	0.286634	0.259693
198	0.220582	0.245278	0.215432		198	0.216067	0.287848	0.261076
199	0.218566	0.24598	0.215418		199	0.214722	0.288538	0.260114
200	0.216405	0.246283	0.21616		200	0.214028	0.289982	0.261319
201	0.212871	0.244721	0.214383		201	0.214252	0.289942	0.26326
202	0.211313	0.24558	0.214192		202	0.213292	0.28841	0.26392
203	0.209179	0.244977	0.215139		203	0.213009	0.288174	0.264896
204	0.208257	0.243045	0.214764		204	0.211444	0.289422	0.266292
205	0.209995	0.242769	0.217162		205	0.210389	0.288939	0.26762
206	0.207832	0.243083	0.218563		206	0.20844	0.288491	0.26402
207	0.206987	0.239618	0.220096		207	0.206659	0.291634	0.264299
208	0.206438	0.236924	0.219908		208	0.203657	0.290583	0.262088
209	0.205866	0.234297	0.218311		209	0.204684	0.288107	0.262874
210	0.204857	0.231873	0.215351		210	0.204369	0.286785	0.260775
211	0.205541	0.22966	0.214484		211	0.204555	0.287792	0.260028
212	0.204281	0.230466	0.211643		212	0.206029	0.285777	0.262246
213	0.205186	0.230999	0.212364		213	0.207817	0.288122	0.264731
214	0.203629	0.23445	0.212825		214	0.206849	0.287382	0.265847
215	0.201522	0.235091	0.213046		215	0.206894	0.289819	0.264771
216	0.200647	0.235557	0.210508		216	0.207784	0.28966	0.269313
217	0.199449	0.235452	0.212941		217	0.20534	0.289595	0.269219
218	0.197068	0.237862	0.211094		218	0.205189	0.288412	0.272754
219	0.197345	0.234027	0.211632		219	0.205574	0.290792	0.273839
220	0.197345	0.233117	0.212209		220	0.206142	0.287754	0.278368
221	0.195881	0.233571	0.214707		221	0.205985	0.287178	0.277794
222	0.197852	0.236409	0.213181		222	0.207535	0.287218	0.281343
223	0.198611	0.238462	0.212846		223	0.208698	0.287805	0.282234
224	0.198446	0.244373	0.211227		224	0.208295	0.287814	0.283711
225	0.196304	0.247551	0.210373		225	0.209574	0.288555	0.283363
226	0.196905	0.251114	0.209256		226	0.209686	0.288531	0.282875
227	0.193171	0.250784	0.210526		227	0.210842	0.287776	0.278943
228	0.192104	0.248665	0.211367		228	0.209771	0.287219	0.27757
229	0.189671	0.247273	0.212809		229	0.211072	0.285439	0.276203
230	0.190019	0.246345	0.214456		230	0.209637	0.28788	0.274733
231	0.188686	0.246158	0.215572		231	0.209416	0.291652	0.275619
232	0.191172	0.246651	0.213992		232	0.209241	0.292257	0.27548
233	0.193363	0.246861	0.213823		233	0.209828	0.29343	0.272623
234	0.194103	0.246295	0.214039		234	0.209484	0.293977	0.272444
235	0.196594	0.247772	0.211567		235	0.209606	0.294433	0.27329
236	0.197291	0.247757	0.210784		236	0.210835	0.290349	0.273344
237	0.195291	0.246259	0.209622		237	0.21079	0.288474	0.27409
238	0.194292	0.245365	0.207945		238	0.210099	0.28667	0.275788
239	0.194908	0.243659	0.206437		239	0.21001	0.284915	0.276384
240	0.194673	0.240254	0.207373		240	0.211897	0.282601	0.274986
241	0.194524	0.238137	0.206188		241	0.212736	0.281725	0.273486
242	0.195316	0.237529	0.208156		242	0.21563	0.281882	0.272818
243	0.193836	0.237565	0.208075		243	0.218156	0.280017	0.273746
244	0.194348	0.23873	0.207484		244	0.22112	0.281053	0.271739
245	0.194716	0.239933	0.205874		245	0.222286	0.279062	0.272138
246	0.193442	0.237769	0.208865		246	0.22376	0.279845	0.271087
247	0.193533	0.237334	0.208125		247	0.22291	0.281137	0.269955
248	0.19399	0.235328	0.20804		248	0.224305	0.281098	0.268213
249	0.191432	0.235368	0.206189		249	0.225251	0.279934	0.268074
250	0.190199	0.233409	0.206202		250	0.223873	0.280487	0.267704
251	0.190419	0.234402	0.204237		251	0.223079	0.278345	0.269252
252	0.191605	0.232869	0.201932		252	0.224103	0.278772	0.269486
253	0.191492	0.231946	0.202558		253	0.22449	0.279053	0.269313
254	0.192734	0.229895	0.204418		254	0.224242	0.281322	0.267421
255	0.192586	0.229347	0.204848		255	0.226458	0.283988	0.266047
256	0.194672	0.227924	0.203236		256	0.228361	0.286842	0.262848
257	0.192616	0.228552	0.204328		257	0.229979	0.286411	0.259935
258	0.194304	0.227977	0.204062		258	0.231184	0.288254	0.256354
259	0.19357	0.224898	0.202905		259	0.232898	0.289489	0.253341
260	0.193538	0.222642	0.20061		260	0.234228	0.288506	0.252379
261	0.193327	0.221066	0.201756		261	0.233606	0.287914	0.253446
262	0.194029	0.218019	0.202515		262	0.233976	0.289142	0.253394
263	0.19181	0.216979	0.201338		263	0.234532	0.289284	0.255302
264	0.193252	0.218338	0.202213		264	0.235309	0.288513	0.256496
265	0.192653	0.217832	0.203958		265	0.234269	0.289495	0.256875
266	0.193159	0.219303	0.203554		266	0.235265	0.288732	0.255985
267	0.192836	0.21766	0.202275		267	0.235654	0.289174	0.255583
268	0.194518	0.218525	0.203779		268	0.237117	0.288551	0.255408
269	0.192458	0.220115	0.203306		269	0.236341	0.287797	0.256539
270	0.193605	0.220308	0.204376		270	0.238412	0.287276	0.255071
271	0.192519	0.219209	0.203867		271	0.240867	0.288568	0.255718
272	0.193543	0.220363	0.203325		272	0.241127	0.285672	0.256675
273	0.192948	0.218066	0.202616		273	0.240526	0.287036	0.258593
274	0.195843	0.215627	0.203694		274	0.240222	0.289237	0.258961
275	0.195191	0.21538	0.203061		275	0.237805	0.289232	0.259797
276	0.196124	0.214168	0.203256		276	0.235568	0.289053	0.257965
277	0.196113	0.215072	0.20304		277	0.234189	0.29096	0.256978
278	0.194802	0.214854	0.202274		278	0.232312	0.291469	0.251029
279	0.192932	0.216352	0.200893		279	0.229226	0.289724	0.248352
280	0.192291	0.216894	0.201021		280	0.228348	0.289349	0.245794
281	0.191227	0.217333	0.202103		281	0.226803	0.290002	0.243257
282	0.192207	0.217202	0.203429		282	0.22571	0.292653	0.240473
283	0.192892	0.219528	0.20412		283	0.223836	0.293543	0.239595
284	0.193531	0.218013	0.205811		284	0.22471	0.296541	0.237817
285	0.193151	0.217405	0.206043		285	0.223452	0.295756	0.238001
286	0.193441	0.216773	0.205817		286	0.223162	0.298545	0.238849
287	0.192838	0.216347	0.205311		287	0.221532	0.297321	0.238626
288	0.19267	0.216519	0.206711		288	0.220064	0.298577	0.239222
289	0.192615	0.215597	0.206036		289	0.218329	0.298212	0.238482
290	0.192836	0.217144	0.205564		290	0.217027	0.30181	0.236267
291	0.194802	0.215166	0.206684		291	0.215881	0.304014	0.233877
292	0.195333	0.213931	0.207476		292	0.21587	0.306691	0.233622
293	0.196683	0.212504	0.207422		293	0.215623	0.309945	0.232181
294	0.198147	0.213642	0.207606		294	0.215804	0.313454	0.231533
295	0.20029	0.215624	0.208994		295	0.215827	0.31816	0.230836
296	0.202046	0.216501	0.207646		296	0.213788	0.319379	0.229988
297	0.202822	0.216635	0.207216		297	0.213395	0.322266	0.227341
298	0.203741	0.216854	0.207185		298	0.213422	0.324096	0.227653
299	0.202741	0.215242	0.206263		299	0.213178	0.326672	0.227415
300	0.201681	0.213373	0.205087		300	0.21157	0.329939	0.227518
301	0.200402	0.215189	0.205908		301	0.213366	0.334316	0.227736
302	0.19998	0.217348	0.206883		302	0.212179	0.339886	0.229598
303	0.197724	0.217495	0.206375		303	0.212643	0.343284	0.228654
304	0.196863	0.219264	0.210891		304	0.211939	0.348041	0.227538
305	0.196519	0.218371	0.211097		305	0.214925	0.352112	0.226255
306	0.193963	0.219919	0.211331		306	0.213042	0.355893	0.228593
307	0.192948	0.219819	0.212261		307	0.2133	0.359416	0.22803
308	0.194709	0.221518	0.214716		308	0.21368	0.36408	0.228497
309	0.19531	0.221478	0.211897		309	0.213012	0.366136	0.229154
310	0.194709	0.222222	0.213211		310	0.210866	0.368039	0.230881
311	0.194579	0.219291	0.214768		311	0.211092	0.368912	0.229572
312	0.194812	0.216937	0.215141		312	0.210396	0.367571	0.228787
313	0.193071	0.215656	0.213139		313	0.20675	0.368776	0.229242
314	0.193271	0.21523	0.213696		314	0.206694	0.371149	0.228495
315	0.192084	0.214903	0.213873		315	0.206448	0.368828	0.228185
316	0.192867	0.215313	0.2118		316	0.207143	0.368204	0.227623
317	0.190623	0.21596	0.211465		317	0.207071	0.369203	0.228902
318	0.19017	0.215794	0.213989		318	0.208706	0.365766	0.22815
319	0.188871	0.215748	0.214507		319	0.209727	0.360977	0.229466
320	0.189693	0.215852	0.216319		320	0.210406	0.36165	0.228218
321	0.189866	0.216764	0.218979		321	0.21088	0.361363	0.228059
322	0.191476	0.215941	0.219022		322	0.213712	0.360502	0.228065
323	0.191649	0.216285	0.218986		323	0.215258	0.359445	0.22768
324	0.190932	0.217316	0.219728		324	0.215496	0.361602	0.22806
325	0.191544	0.216376	0.216998		325	0.216549	0.359013	0.23101
326	0.187115	0.216884	0.214899		326	0.216741	0.359232	0.230693
327	0.185997	0.219512	0.214201		327	0.214068	0.358857	0.229074
328	0.185743	0.21904	0.211918		328	0.213888	0.361086	0.229736
329	0.186271	0.219274	0.210954		329	0.214072	0.358708	0.228928
330	0.18634	0.220919	0.209819		330	0.213437	0.360846	0.226437
331	0.18904	0.220775	0.209249		331	0.213122	0.359024	0.226655
332	0.189977	0.219796	0.210883		332	0.214371	0.356058	0.227163
333	0.190026	0.219803	0.211249		333	0.212455	0.353229	0.226214
334	0.191808	0.219166	0.210853		334	0.210798	0.350613	0.226971
335	0.191605	0.217149	0.211792		335	0.210268	0.34759	0.227093
336	0.194077	0.218082	0.211771		336	0.207885	0.342745	0.227096
337	0.193752	0.217901	0.207929		337	0.206139	0.343567	0.229023
338	0.194649	0.217994	0.209836		338	0.207824	0.338914	0.228738
339	0.193668	0.217569	0.207874		339	0.206944	0.337057	0.228496
340	0.194743	0.217651	0.207996		340	0.206627	0.333837	0.229687
341	0.194272	0.216542	0.208198		341	0.208028	0.33335	0.23008
342	0.194565	0.216441	0.209477		342	0.209286	0.32635	0.228939
343	0.193714	0.214824	0.207367		343	0.208707	0.323823	0.231868
344	0.193532	0.214504	0.210756		344	0.209446	0.319733	0.233496
345	0.192914	0.214995	0.211055		345	0.208013	0.316145	0.232262
346	0.191875	0.213731	0.209561		346	0.20706	0.311309	0.233643
347	0.190298	0.213095	0.209443		347	0.204312	0.309306	0.233905
348	0.190531	0.214399	0.207922		348	0.201415	0.305743	0.23501
349	0.189696	0.214691	0.205043		349	0.201486	0.30319	0.235894
350	0.188421	0.214747	0.204965		350	0.20269	0.301414	0.238643
351	0.188197	0.213898	0.205276		351	0.202315	0.299824	0.239839
352	0.190147	0.214982	0.205107		352	0.202462	0.297497	0.243309
353	0.190428	0.215886	0.206064		353	0.203394	0.298539	0.243731
354	0.191142	0.216033	0.207617		354	0.202133	0.295268	0.242105
355	0.192844	0.215073	0.207302		355	0.200629	0.29198	0.240286
356	0.192608	0.217425	0.208756		356	0.201715	0.290327	0.241682
357	0.1936	0.218056	0.208906		357	0.202633	0.288391	0.239216
358	0.196807	0.218229	0.20745		358	0.202663	0.284871	0.237042
359	0.199984	0.217547	0.204999		359	0.203101	0.283482	0.238577
360	0.203557	0.217137	0.204475		360	0.204948	0.281794	0.23951
361	0.206597	0.21538	0.203961		361	0.203689	0.279482	0.23948
362	0.208916	0.215524	0.204024		362	0.202903	0.2772	0.239712
363	0.210078	0.214918	0.205013		363	0.202722	0.274612	0.240441
364	0.210531	0.216368	0.205102		364	0.202175	0.276826	0.239883
365	0.209569	0.218858	0.20461		365	0.199814	0.275939	0.239644
366	0.210828	0.220653	0.204918		366	0.19974	0.277309	0.238213
367	0.210103	0.220282	0.204971		367	0.199061	0.278563	0.240335
368	0.208916	0.222643	0.204761		368	0.199486	0.278422	0.240377
369	0.208434	0.22169	0.207145		369	0.199454	0.275375	0.240289
370	0.207781	0.223422	0.206789		370	0.199328	0.27416	0.239895
371	0.206196	0.22401	0.206044		371	0.198267	0.270891	0.239233
372	0.208377	0.225312	0.206236		372	0.198499	0.269801	0.239341
373	0.208545	0.225979	0.207242		373	0.197471	0.268562	0.240375
374	0.210561	0.231109	0.205792		374	0.197289	0.267707	0.243026
375	0.210087	0.233807	0.206161		375	0.197666	0.267042	0.245692
376	0.211329	0.236323	0.205722		376	0.197507	0.266348	0.245985
377	0.210538	0.238768	0.205265		377	0.197707	0.264911	0.242297
378	0.210351	0.240717	0.203951		378	0.196983	0.266054	0.24308
379	0.208145	0.238931	0.204253		379	0.196587	0.263384	0.242205
380	0.210652	0.240188	0.204474		380	0.196427	0.263935	0.241922
381	0.209931	0.241661	0.205212		381	0.196683	0.264152	0.241415
382	0.209413	0.241708	0.204845		382	0.195926	0.264666	0.243209
383	0.208587	0.241892	0.204633		383	0.196131	0.261754	0.242524
384	0.210873	0.243106	0.203805		384	0.196094	0.264354	0.24085
385	0.210908	0.241013	0.202595		385	0.1953	0.261738	0.242131
386	0.214384	0.238866	0.202036		386	0.194987	0.260749	0.245344
387	0.216293	0.24037	0.202576		387	0.194581	0.260145	0.24892
388	0.218673	0.239347	0.202431		388	0.194869	0.261185	0.249656
389	0.218203	0.24046	0.203622		389	0.19456	0.258678	0.253345
390	0.21816	0.239172	0.202643		390	0.193405	0.260761	0.253615
391	0.216396	0.23993	0.201529		391	0.192062	0.262039	0.254371
392	0.214924	0.239522	0.199982		392	0.191731	0.263334	0.252956
393	0.21549	0.239754	0.19992		393	0.190364	0.265284	0.256783
394	0.214874	0.239619	0.200221		394	0.190079	0.265058	0.258332
395	0.214783	0.238356	0.202015		395	0.191611	0.264647	0.260926
396	0.216357	0.237129	0.201454		396	0.191895	0.264326	0.26217
397	0.217054	0.23378	0.201964		397	0.19209	0.259021	0.26364
398	0.217325	0.232137	0.20174		398	0.192203	0.258837	0.265277
399	0.220309	0.23101	0.20049		399	0.192555	0.260138	0.267627
400	0.223883	0.230998	0.201853		400	0.191906	0.261048	0.269938
401	0.225227	0.229669	0.202989		401	0.19196	0.26144	0.274552
402	0.229803	0.230067	0.203684		402	0.192482	0.2638	0.276929
403	0.231989	0.230004	0.205069		403	0.192863	0.263234	0.278824
404	0.235369	0.229986	0.204955		404	0.192943	0.265075	0.280133
405	0.235482	0.230955	0.203579		405	0.191944	0.265257	0.281526
406	0.235783	0.233487	0.204189		406	0.192833	0.265212	0.281834
407	0.233762	0.233904	0.203233		407	0.192759	0.266569	0.290869
408	0.232101	0.23343	0.20307		408	0.193271	0.26528	0.29768
409	0.231159	0.232388	0.20389		409	0.192616	0.261401	0.310239
410	0.231061	0.232638	0.202426		410	0.194285	0.259532	0.318476
411	0.232825	0.231302	0.202865		411	0.193999	0.257372	0.330861
412	0.234209	0.233122	0.203024		412	0.193652	0.255337	0.339898
413	0.235675	0.234174	0.201353		413	0.195877	0.254554	0.349987
414	0.233574	0.235089	0.19899		414	0.197114	0.256327	0.35345
415	0.233254	0.235202	0.2006		415	0.196501	0.254456	0.363189
416	0.23255	0.23666	0.199459		416	0.196915	0.254047	0.365543
417	0.230131	0.234313	0.200589		417	0.197273	0.254113	0.368051
418	0.231171	0.230215	0.202854		418	0.195677	0.252042	0.369066
419	0.234629	0.229171	0.20589		419	0.196552	0.252306	0.370364
420	0.234121	0.227691	0.205049		420	0.198602	0.254965	0.368748
421	0.231615	0.227552	0.20523		421	0.200126	0.254614	0.369235
422	0.233825	0.227013	0.204245		422	0.201209	0.254167	0.36964
423	0.232164	0.231198	0.203654		423	0.201979	0.25677	0.368588
424	0.226566	0.229805	0.203365		424	0.200771	0.255128	0.36425
425	0.226461	0.228546	0.204568		425	0.200018	0.252444	0.361067
426	0.227649	0.228826	0.2039		426	0.200745	0.252562	0.357055
427	0.225573	0.227836	0.203307		427	0.201564	0.251113	0.347988
428	0.224282	0.225456	0.203657		428	0.20219	0.248457	0.341475
429	0.224987	0.225093	0.2014		429	0.204203	0.246953	0.339123
430	0.223035	0.226004	0.20135		430	0.206347	0.245674	0.335424
431	0.221723	0.222636	0.202955		431	0.205807	0.242924	0.330487
432	0.220438	0.22315	0.20471		432	0.207506	0.242245	0.328113
433	0.220252	0.222	0.204067		433	0.209333	0.242316	0.319131
434	0.218647	0.221286	0.206167		434	0.21035	0.240433	0.310444
435	0.218096	0.221016	0.205891		435	0.211246	0.240496	0.299163
436	0.21782	0.220729	0.205326		436	0.211897	0.239618	0.291666
437	0.217824	0.219041	0.204872		437	0.211943	0.238556	0.286725
438	0.218611	0.22031	0.204635		438	0.211668	0.237779	0.283262
439	0.21926	0.221812	0.205286		439	0.2106	0.23888	0.279885
440	0.218023	0.222227	0.205818		440	0.20919	0.239368	0.276235
441	0.217981	0.223788	0.206347		441	0.21024	0.24087	0.271507
442	0.218812	0.226741	0.205913		442	0.210804	0.241669	0.264858
443	0.217155	0.229054	0.206928		443	0.211979	0.240133	0.260966
444	0.217056	0.231822	0.205666		444	0.213344	0.24117	0.254921
445	0.2157	0.235347	0.204885		445	0.21481	0.241559	0.254607
446	0.213511	0.238264	0.205157		446	0.215129	0.243	0.251175
447	0.210295	0.239193	0.206101		447	0.215311	0.243619	0.248621
448	0.209916	0.242576	0.204274		448	0.214541	0.246338	0.24546
449	0.210054	0.2415	0.204119		449	0.215497	0.246585	0.242672
450	0.21199	0.24021	0.205313		450	0.216634	0.245254	0.23854
451	0.212679	0.238154	0.203987		451	0.216836	0.243422	0.239593
452	0.211717	0.236791	0.203614		452	0.216687	0.243053	0.236488
453	0.211061	0.233093	0.204317		453	0.217496	0.242717	0.237016
454	0.208558	0.23256	0.203087		454	0.217024	0.240748	0.235721
455	0.207471	0.231762	0.201362		455	0.21516	0.241408	0.237033
456	0.206618	0.230967	0.201497		456	0.214357	0.242785	0.236119
457	0.207968	0.233173	0.199902		457	0.213851	0.242082	0.237447
458	0.207229	0.23477	0.200279		458	0.212738	0.244019	0.235895
459	0.207581	0.233429	0.201387		459	0.211147	0.244755	0.237889
460	0.207439	0.230987	0.202065		460	0.210079	0.245176	0.234676
461	0.2071	0.231458	0.201238		461	0.210046	0.243961	0.232629
462	0.205159	0.228848	0.20197		462	0.209121	0.245099	0.232325
463	0.206708	0.226448	0.201845		463	0.208954	0.242463	0.229779
464	0.20704	0.228309	0.201751		464	0.208373	0.243182	0.227715
465	0.206969	0.229761	0.20269		465	0.208154	0.242598	0.228065
466	0.208382	0.229625	0.203416		466	0.207455	0.24231	0.226072
467	0.210775	0.230648	0.205064		467	0.206135	0.241892	0.223391
468	0.210708	0.229847	0.206576		468	0.204094	0.239962	0.224635
469	0.211537	0.226453	0.206628		469	0.203949	0.238418	0.224466
470	0.211693	0.224202	0.205152		470	0.203426	0.236375	0.223684
471	0.209897	0.221813	0.206402		471	0.201864	0.237678	0.223809
472	0.210752	0.218871	0.205858		472	0.200753	0.234052	0.224918
473	0.210083	0.21975	0.204161		473	0.200091	0.233642	0.223467
474	0.209456	0.217127	0.204685		474	0.19915	0.232176	0.222198
475	0.209937	0.218779	0.207058		475	0.198005	0.231235	0.222462
476	0.209224	0.219753	0.207744		476	0.197146	0.228615	0.222692
477	0.2069	0.221276	0.207647		477	0.198175	0.229707	0.221804
478	0.204918	0.218868	0.208838		478	0.198893	0.229521	0.220292
479	0.205346	0.221768	0.208767		479	0.199026	0.230934	0.21967
480	0.203788	0.22101	0.207949		480	0.198227	0.231018	0.218607
481	0.202624	0.219612	0.206714		481	0.199883	0.230724	0.217791
482	0.203349	0.218336	0.207373		482	0.200655	0.231827	0.216483
483	0.203785	0.218751	0.208456		483	0.201838	0.231922	0.218271
484	0.201736	0.217419	0.20843		484	0.204036	0.229785	0.219137
485	0.202635	0.216428	0.209298		485	0.206856	0.230365	0.221751
486	0.204113	0.217159	0.20857		486	0.206736	0.22979	0.22194
487	0.20282	0.216433	0.208591		487	0.207091	0.22723	0.222179
488	0.203019	0.21466	0.207208		488	0.206631	0.228594	0.222389
489	0.203567	0.215281	0.207012		489	0.20476	0.229559	0.22212
490	0.202802	0.214586	0.207205		490	0.2037	0.229074	0.220789
491	0.20344	0.215186	0.20825		491	0.202034	0.230767	0.221994
492	0.204017	0.21696	0.20727		492	0.20132	0.233467	0.222685
493	0.204971	0.218189	0.206764		493	0.20107	0.234768	0.2235
494	0.204064	0.219126	0.208059		494	0.20083	0.235592	0.223598
495	0.205753	0.220698	0.206872		495	0.200022	0.236624	0.22348
496	0.203778	0.220715	0.205279		496	0.200421	0.237784	0.223126
497	0.202708	0.220638	0.206094		497	0.199665	0.237406	0.22134
498	0.200334	0.223059	0.206365		498	0.198866	0.237298	0.21852
499	0.200719	0.223445	0.204284		499	0.198536	0.237613	0.217899
500	0.198304	0.222903	0.202989		500	0.19906	0.23891	0.217017
501	0.197887	0.221502	0.204348		501	0.199196	0.238301	0.216874
502	0.199439	0.220546	0.202318		502	0.197974	0.238289	0.21662
503	0.200562	0.219295	0.201005		503	0.196898	0.237961	0.217109
504	0.201401	0.223815	0.202865		504	0.195501	0.238394	0.216367
505	0.20178	0.22638	0.20237		505	0.193748	0.238059	0.214643
506	0.203526	0.230534	0.203341		506	0.192528	0.236708	0.212625
507	0.201764	0.234542	0.203395		507	0.192815	0.238574	0.212505
508	0.200125	0.235546	0.204356		508	0.191292	0.239637	0.211337
509	0.198438	0.231408	0.204192		509	0.191703	0.24134	0.211918
510	0.197813	0.232045	0.205748		510	0.191523	0.243313	0.211909
511	0.196975	0.229683	0.203598		511	0.190314	0.247273	0.211905
512	0.196409	0.227717	0.204137		512	0.189516	0.24919	0.211052
513	0.197152	0.226926	0.203348		513	0.189198	0.250997	0.211151
514	0.19764	0.229137	0.202097		514	0.188304	0.253674	0.210233
515	0.19748	0.228799	0.201586		515	0.187641	0.254777	0.211201
516	0.197507	0.230112	0.201582		516	0.188267	0.255821	0.210768
517	0.196064	0.23286	0.20163		517	0.187875	0.25657	0.211234
518	0.19474	0.23325	0.202295		518	0.188552	0.255895	0.212071
519	0.193481	0.233314	0.201136		519	0.187612	0.255994	0.210532
520	0.192507	0.234495	0.201596		520	0.18687	0.257946	0.208064
521	0.191867	0.235649	0.20251		521	0.185947	0.258919	0.208112
522	0.193298	0.233957	0.204414		522	0.18511	0.259487	0.20837
523	0.192714	0.234743	0.205387		523	0.184505	0.260786	0.207776
524	0.192127	0.235056	0.2059		524	0.184242	0.260692	0.208617
525	0.19158	0.233405	0.205024		525	0.184627	0.26016	0.209652
526	0.190574	0.233064	0.204442		526	0.185287	0.259147	0.208877
527	0.18932	0.231753	0.20137		527	0.185929	0.259039	0.209924
528	0.189582	0.231652	0.199264		528	0.185769	0.25911	0.210172
529	0.188979	0.228853	0.199491		529	0.185801	0.258728	0.2109
530	0.187716	0.227421	0.199478		530	0.185594	0.257101	0.211234
531	0.187153	0.226552	0.198815		531	0.185759	0.256518	0.21232
532	0.187983	0.227418	0.199734		532	0.186197	0.254565	0.211326
533	0.188372	0.228438	0.20089		533	0.18615	0.252827	0.211659
534	0.190635	0.227864	0.20245		534	0.187882	0.252036	0.213098
535	0.192501	0.229555	0.202597		535	0.188313	0.249373	0.212464
536	0.193405	0.22923	0.204042		536	0.189337	0.248619	0.213658
537	0.192783	0.228301	0.206399		537	0.188505	0.247905	0.212599
538	0.192834	0.227196	0.208118		538	0.188724	0.247054	0.213006
539	0.191334	0.227505	0.207631		539	0.188357	0.246574	0.213357
540	0.191484	0.226356	0.207056		540	0.188667	0.247018	0.214021
541	0.190416	0.226735	0.206808		541	0.187512	0.243671	0.212774
542	0.190464	0.226891	0.206562		542	0.187705	0.242358	0.215753
543	0.189574	0.227064	0.206187		543	0.188378	0.241009	0.216004
544	0.188568	0.227294	0.207616		544	0.18776	0.236846	0.213831
545	0.1877	0.228445	0.209546		545	0.188052	0.23678	0.214823
546	0.188119	0.230227	0.210575		546	0.188063	0.236528	0.216648
547	0.18947	0.231923	0.209807		547	0.188141	0.239082	0.214046
548	0.190491	0.233835	0.211298		548	0.187211	0.239344	0.213623
549	0.192743	0.236814	0.212259		549	0.187513	0.24041	0.215383
550	0.191852	0.238872	0.212379		550	0.187234	0.239409	0.215525
551	0.191898	0.241126	0.213719		551	0.186667	0.242714	0.214543
552	0.189791	0.24216	0.213493		552	0.187283	0.237313	0.214468
553	0.189251	0.244255	0.211442		553	0.188628	0.23656	0.216404
554	0.187672	0.244805	0.21018		554	0.189175	0.235696	0.216253
555	0.188648	0.244363	0.210533		555	0.1901	0.236958	0.216289
556	0.189038	0.241953	0.208057		556	0.190361	0.234497	0.215957
557	0.188828	0.243559	0.209144		557	0.188243	0.238029	0.21733
558	0.189625	0.242936	0.209882		558	0.186338	0.239208	0.215831
559	0.19	0.244891	0.207813		559	0.185289	0.240709	0.217078
560	0.189634	0.246738	0.206963		560	0.184639	0.241037	0.216566
561	0.18877	0.246835	0.207364		561	0.184464	0.239983	0.218547
562	0.190062	0.244532	0.207625		562	0.185422	0.240896	0.219217
563	0.189336	0.242054	0.205874		563	0.18668	0.24167	0.218932
564	0.189724	0.238126	0.207602		564	0.186593	0.240788	0.217092
565	0.191606	0.236184	0.206427		565	0.186034	0.237883	0.218621
566	0.190887	0.238381	0.205194		566	0.187175	0.238912	0.216578
567	0.189687	0.238957	0.203983		567	0.18673	0.236682	0.216183
568	0.189988	0.239618	0.203792		568	0.187243	0.234735	0.215076
569	0.19036	0.243352	0.201014		569	0.188049	0.233821	0.21433
570	0.189559	0.243734	0.202358		570	0.188801	0.232456	0.213364
571	0.191947	0.242747	0.202815		571	0.187737	0.229227	0.213159
572	0.192897	0.242423	0.202105		572	0.188652	0.22755	0.212838
573	0.19167	0.244129	0.201371		573	0.188887	0.22543	0.21233
574	0.190448	0.243936	0.202485		574	0.189157	0.223639	0.212383
575	0.190268	0.244768	0.200716		575	0.188886	0.223588	0.211483
576	0.188204	0.244211	0.202287		576	0.189836	0.225395	0.209432
577	0.188848	0.246106	0.202631		577	0.189314	0.225025	0.205967
578	0.190239	0.246118	0.205076		578	0.1878	0.224669	0.203681
579	0.191827	0.243834	0.205041		579	0.187371	0.226359	0.200649
580	0.192717	0.243486	0.207053		580	0.186675	0.22733	0.198359
581	0.193997	0.243013	0.20635		581	0.186946	0.226441	0.198357
582	0.193654	0.241401	0.20741		582	0.188242	0.227665	0.199979
583	0.194037	0.24013	0.205482		583	0.189058	0.228129	0.201324
584	0.19355	0.242599	0.206628		584	0.188963	0.227275	0.203339
585	0.192494	0.241672	0.206712		585	0.190041	0.226821	0.202398
586	0.192364	0.242251	0.206819		586	0.188815	0.227442	0.202585
587	0.192385	0.24062	0.206336		587	0.188858	0.22671	0.202509
588	0.190494	0.240856	0.207867		588	0.188441	0.226681	0.20293
589	0.189535	0.237156	0.208702		589	0.188036	0.227442	0.201498
590	0.190252	0.237119	0.208603		590	0.188086	0.228463	0.203755
591	0.190895	0.234774	0.209517		591	0.188629	0.228167	0.203103
592	0.191526	0.235327	0.210241		592	0.188014	0.228302	0.203308
593	0.191464	0.235015	0.209109		593	0.187898	0.229241	0.203396
594	0.192958	0.236003	0.207266		594	0.188169	0.227787	0.203396
595	0.191849	0.235904	0.206853		595	0.187734	0.227781	0.202719
596	0.190308	0.236895	0.20673		596	0.187403	0.227991	0.203256
597	0.189173	0.236559	0.206903		597	0.186265	0.228345	0.203925
598	0.191231	0.23748	0.207252		598	0.186031	0.228922	0.203842
599	0.189828	0.23846	0.208928		599	0.186129	0.229586	0.204137
600	0.189179	0.239756	0.209045		600	0.185306	0.228078	0.203406
601	0.189289	0.239922	0.209291		601	0.185307	0.22685	0.202796
602	0.188127	0.240645	0.208282		602	0.186512	0.227287	0.200438
603	0.186696	0.238477	0.208043		603	0.188392	0.226368	0.200559
604	0.18481	0.237571	0.206442		604	0.187975	0.227594	0.202276
605	0.186421	0.239137	0.207143		605	0.188429	0.228891	0.204196
606	0.186786	0.238978	0.205191		606	0.189937	0.232081	0.204842
607	0.188185	0.239993	0.203901		607	0.191185	0.232407	0.207339
608	0.188232	0.241748	0.204522		608	0.192325	0.234213	0.208757
609	0.190425	0.241733	0.203925		609	0.194887	0.23465	0.20872
610	0.190219	0.237717	0.203254		610	0.196658	0.236601	0.209006
611	0.19	0.24089	0.203721		611	0.19753	0.235745	0.210745
612	0.190064	0.241165	0.206509		612	0.198007	0.236518	0.21247
613	0.191095	0.24133	0.206876		613	0.198196	0.236749	0.211701
614	0.190865	0.240472	0.208033		614	0.198865	0.238282	0.211975
615	0.190166	0.242247	0.206886		615	0.199843	0.238917	0.21265
616	0.190375	0.239966	0.207049		616	0.200008	0.241434	0.21317
617	0.190563	0.238775	0.204574		617	0.201272	0.241626	0.212394
618	0.189487	0.238446	0.203507		618	0.201112	0.24104	0.211363
619	0.188536	0.239445	0.203892		619	0.202144	0.242476	0.210957
620	0.188682	0.237054	0.205684		620	0.203545	0.241711	0.210843
621	0.189355	0.234828	0.206953		621	0.205784	0.241122	0.210556
622	0.18923	0.234428	0.208065		622	0.207765	0.241176	0.210063
623	0.18991	0.233292	0.20938		623	0.211525	0.241601	0.212881
624	0.190153	0.233432	0.208483		624	0.211838	0.241304	0.213968
625	0.188592	0.23298	0.207076		625	0.2125	0.242267	0.214145
626	0.18792	0.232328	0.204593		626	0.212787	0.240868	0.214526
627	0.186369	0.228966	0.205002		627	0.212034	0.241951	0.212702
628	0.186607	0.226281	0.204105		628	0.211645	0.242527	0.212115
629	0.188156	0.22306	0.204347		629	0.211407	0.241343	0.212167
630	0.189503	0.223066	0.205569		630	0.210579	0.240995	0.212474
631	0.190801	0.223139	0.205905		631	0.209674	0.243212	0.210711
632	0.191429	0.22439	0.205213		632	0.208041	0.243586	0.214294
633	0.190799	0.224983	0.2043		633	0.206764	0.243508	0.215018
634	0.19077	0.226706	0.203816		634	0.20461	0.246317	0.216262
635	0.191118	0.224792	0.203099		635	0.203383	0.247474	0.216074
636	0.192037	0.224132	0.20343		636	0.200914	0.247859	0.218433
637	0.192545	0.223751	0.203177		637	0.200135	0.2489	0.217453
638	0.194136	0.22128	0.203352		638	0.199354	0.250201	0.216885
639	0.192959	0.220676	0.205719		639	0.199243	0.248308	0.215896
640	0.192377	0.223488	0.206495		640	0.199723	0.248008	0.215866
641	0.189364	0.22182	0.206476		641	0.200207	0.249749	0.216181
642	0.189502	0.220596	0.206672		642	0.198655	0.251816	0.216221
643	0.190784	0.222393	0.207415		643	0.19607	0.253341	0.216293
644	0.191394	0.220797	0.205938		644	0.195015	0.254877	0.215766
645	0.192473	0.218179	0.203622		645	0.193337	0.256152	0.214997
646	0.194305	0.216946	0.204493		646	0.192805	0.256353	0.213096
647	0.195277	0.217061	0.203592		647	0.193343	0.255376	0.211968
648	0.193549	0.215	0.203219		648	0.193409	0.254392	0.211829
649	0.193377	0.210911	0.203929		649	0.193639	0.254702	0.21257
650	0.19236	0.209692	0.2052		650	0.192219	0.254903	0.213498
651	0.191401	0.210442	0.205168		651	0.191295	0.253197	0.215039
652	0.190243	0.209664	0.20552		652	0.19052	0.253566	0.21499
653	0.190072	0.209087	0.20655		653	0.18923	0.253552	0.214144
654	0.19105	0.211014	0.206187		654	0.187828	0.253134	0.213235
655	0.191625	0.210019	0.205077		655	0.187101	0.253269	0.211058
656	0.190951	0.209828	0.204085		656	0.186705	0.255066	0.2098
657	0.190679	0.208454	0.204098		657	0.18577	0.2543	0.210067
658	0.189288	0.207951	0.203343		658	0.185259	0.25458	0.208184
659	0.189719	0.206801	0.201717		659	0.184795	0.254344	0.206489
660	0.19111	0.207371	0.202916		660	0.185611	0.255757	0.207345
661	0.193488	0.205764	0.202589		661	0.184024	0.254465	0.207976
662	0.193929	0.206835	0.202638		662	0.183674	0.254185	0.207697
663	0.19482	0.209085	0.202337		663	0.182421	0.256003	0.210201
664	0.194582	0.210538	0.203007		664	0.182883	0.257302	0.212626
665	0.192616	0.21015	0.203073		665	0.180946	0.255935	0.212012
666	0.19083	0.213711	0.204154		666	0.18163	0.256741	0.212031
667	0.191589	0.213516	0.205201		667	0.180881	0.257498	0.212559
668	0.190812	0.213077	0.20551		668	0.182118	0.256005	0.210973
669	0.189134	0.214013	0.204656		669	0.180884	0.256571	0.209006
670	0.188649	0.21748	0.20425		670	0.181915	0.257844	0.20966
671	0.188641	0.217904	0.203319		671	0.181655	0.257444	0.208874
672	0.189545	0.220987	0.202305		672	0.181612	0.259744	0.210077
673	0.189763	0.223775	0.202793		673	0.181004	0.262195	0.210978
674	0.189131	0.226075	0.203012		674	0.180349	0.262647	0.21183
675	0.191381	0.226043	0.203695		675	0.180676	0.266907	0.212943
676	0.19231	0.22496	0.203559		676	0.18001	0.270586	0.212825
677	0.192478	0.223226	0.202708		677	0.180325	0.272763	0.209921
678	0.191309	0.223455	0.202824		678	0.18021	0.277171	0.209107
679	0.191605	0.2228	0.202823		679	0.180236	0.28088	0.20913
680	0.189807	0.221588	0.200919		680	0.178057	0.280796	0.208852
681	0.188311	0.224998	0.20117		681	0.177897	0.283863	0.207719
682	0.186664	0.225452	0.202418		682	0.177136	0.284662	0.21112
683	0.188848	0.222811	0.200552		683	0.177549	0.283917	0.212568
684	0.190844	0.220813	0.20143		684	0.177738	0.284277	0.212074
685	0.1918	0.222805	0.201492		685	0.177977	0.286534	0.211564
686	0.191682	0.220743	0.201684		686	0.176925	0.286564	0.21281
687	0.191742	0.221146	0.202356		687	0.177377	0.288151	0.21165
688	0.19251	0.222197	0.202022		688	0.176687	0.289091	0.212523
689	0.192099	0.224359	0.201352		689	0.176612	0.288327	0.214483
690	0.190929	0.221817	0.202655		690	0.178337	0.2887	0.214509
691	0.19042	0.221414	0.203038		691	0.179533	0.288811	0.215824
692	0.190213	0.220359	0.20164		692	0.179512	0.289525	0.216889
693	0.191344	0.219499	0.203406		693	0.181167	0.291752	0.216806
694	0.190562	0.218055	0.20412		694	0.183617	0.296908	0.216986
695	0.19175	0.217546	0.202626		695	0.182545	0.296501	0.217715
696	0.192569	0.216574	0.202961		696	0.184349	0.298256	0.219187
697	0.191961	0.215922	0.203674		697	0.185851	0.300889	0.218752
698	0.190513	0.217715	0.202347		698	0.186638	0.300631	0.218695
699	0.191479	0.219859	0.202549		699	0.188011	0.299506	0.218583
700	0.191441	0.220103	0.205384		700	0.190696	0.299819	0.220375
701	0.192691	0.221034	0.204468		701	0.193408	0.299646	0.219982
702	0.194088	0.221208	0.204224		702	0.196088	0.29787	0.222503
703	0.193991	0.218606	0.204013		703	0.198575	0.298763	0.222688
704	0.194196	0.214887	0.204465		704	0.199618	0.301432	0.223458
705	0.196259	0.214783	0.203758		705	0.202693	0.30416	0.223698
706	0.196463	0.214067	0.20371		706	0.203447	0.306824	0.224962
707	0.19571	0.214611	0.203049		707	0.204273	0.308798	0.223823
708	0.19583	0.21501	0.203743		708	0.205487	0.310328	0.225103
709	0.196907	0.214358	0.2039		709	0.206574	0.310335	0.22636
710	0.197603	0.212751	0.204098		710	0.205442	0.31341	0.227908
711	0.19928	0.21049	0.204145		711	0.204232	0.315121	0.227631
712	0.201389	0.210273	0.203648		712	0.204727	0.319738	0.228902
713	0.203329	0.20816	0.20445		713	0.20511	0.322642	0.230736
714	0.204808	0.209912	0.204444		714	0.203937	0.325402	0.230867
715	0.203667	0.211635	0.202804		715	0.203788	0.325662	0.229764
716	0.20371	0.212553	0.202341		716	0.203873	0.326917	0.229638
717	0.204816	0.210928	0.203369		717	0.202725	0.324802	0.229309
718	0.203956	0.211749	0.203419		718	0.200688	0.326004	0.228323
719	0.203201	0.210989	0.20225		719	0.201782	0.325647	0.228624
720	0.204898	0.210303	0.201929		720	0.202697	0.325903	0.226976
721	0.203865	0.211021	0.202365		721	0.202836	0.329143	0.225579
722	0.204311	0.211121	0.202919		722	0.20363	0.333229	0.22565
723	0.205665	0.210353	0.202506		723	0.203983	0.334186	0.225711
724	0.205522	0.210845	0.203341		724	0.202682	0.339369	0.224467
725	0.204085	0.211832	0.20314		725	0.202042	0.341974	0.225979
726	0.203584	0.211707	0.203771		726	0.203158	0.342092	0.228876
727	0.202057	0.211826	0.202541		727	0.202742	0.342991	0.227483
728	0.201036	0.213482	0.202498		728	0.202571	0.345995	0.226847
729	0.202388	0.212184	0.200281		729	0.204235	0.344987	0.225793
730	0.202968	0.209589	0.201942		730	0.204921	0.347612	0.223928
731	0.205099	0.207861	0.201618		731	0.204543	0.351408	0.221531
732	0.206704	0.207205	0.202787		732	0.206311	0.353345	0.223948
733	0.206162	0.204681	0.202725		733	0.207636	0.353315	0.223344
734	0.204584	0.205709	0.204656		734	0.207783	0.355981	0.22446
735	0.203822	0.206975	0.20369		735	0.207673	0.356885	0.225822
736	0.203242	0.206019	0.202462		736	0.208916	0.356714	0.227517
737	0.203084	0.205796	0.202016		737	0.209194	0.356713	0.226309
738	0.203402	0.208638	0.203492		738	0.208573	0.355234	0.226636
739	0.203117	0.20778	0.201782		739	0.209822	0.353298	0.225517
740	0.202784	0.207386	0.201802		740	0.211157	0.352425	0.226624
741	0.202525	0.209138	0.202899		741	0.213334	0.349352	0.223909
742	0.205207	0.208667	0.201746		742	0.215633	0.347703	0.222706
743	0.205701	0.207702	0.19995		743	0.218112	0.34723	0.223494
744	0.206393	0.207627	0.202523		744	0.221102	0.34525	0.224501
745	0.207132	0.208404	0.204125		745	0.223805	0.341366	0.22422
746	0.207864	0.205792	0.205218		746	0.224579	0.341723	0.225472
747	0.205042	0.207082	0.206789		747	0.224948	0.34063	0.227796
748	0.206417	0.207245	0.207369		748	0.229168	0.341643	0.227808
749	0.20712	0.206891	0.205078		749	0.230368	0.341684	0.229411
750	0.209551	0.206245	0.204496		750	0.232497	0.342793	0.23105
751	0.209143	0.210495	0.204328		751	0.234832	0.341377	0.233171
752	0.208658	0.209562	0.202798		752	0.234313	0.339459	0.23285
753	0.209151	0.208746	0.20361		753	0.233572	0.337415	0.233091
754	0.208607	0.208205	0.204019		754	0.235394	0.336957	0.233695
755	0.208101	0.206722	0.204684		755	0.235778	0.335676	0.23178
756	0.207908	0.205607	0.203576		756	0.235665	0.333423	0.232622
757	0.207657	0.207853	0.205606		757	0.239276	0.334072	0.232571
758	0.207985	0.208627	0.204429		758	0.239195	0.332471	0.23314
759	0.208386	0.210286	0.204335		759	0.238242	0.329819	0.232189
760	0.209924	0.20976	0.202373		760	0.237941	0.328613	0.234042
761	0.21143	0.208306	0.203368		761	0.238023	0.327396	0.235567
762	0.215357	0.206355	0.201805		762	0.237242	0.325264	0.236122
763	0.215139	0.206852	0.201143		763	0.236621	0.322077	0.237202
764	0.215577	0.206574	0.202814		764	0.235071	0.321288	0.23892
765	0.214305	0.208081	0.203461		765	0.233925	0.317335	0.238995
766	0.215915	0.210854	0.203216		766	0.233643	0.313442	0.237379
767	0.214708	0.212159	0.203675		767	0.233185	0.309777	0.237575
768	0.214013	0.213817	0.20411		768	0.233394	0.309486	0.236018
769	0.216557	0.216211	0.203248		769	0.233064	0.306927	0.236342
770	0.215518	0.219017	0.202589		770	0.235268	0.306622	0.236549
771	0.213176	0.218405	0.20297		771	0.233452	0.308816	0.236877
772	0.213724	0.21846	0.203377		772	0.23378	0.308044	0.237075
773	0.214915	0.217607	0.204606		773	0.23603	0.305659	0.24048
774	0.214171	0.218309	0.205769		774	0.237429	0.303959	0.238935
775	0.215933	0.219287	0.207328		775	0.237445	0.302524	0.237536
776	0.217019	0.220122	0.207668		776	0.241113	0.301044	0.237035
777	0.217754	0.222035	0.207983		777	0.242498	0.300177	0.23684
778	0.218471	0.221564	0.206053		778	0.242085	0.301337	0.23455
779	0.218999	0.21937	0.207005		779	0.244625	0.302887	0.235901
780	0.218783	0.219735	0.205648		780	0.245411	0.303145	0.237654
781	0.220469	0.219854	0.206032		781	0.245702	0.301345	0.238407
782	0.219804	0.220559	0.206712		782	0.245615	0.302554	0.238986
783	0.219147	0.222703	0.209112		783	0.245995	0.302172	0.239103
784	0.217327	0.225657	0.207462		784	0.244432	0.300593	0.241447
785	0.217976	0.224126	0.208569		785	0.245685	0.301199	0.24325
786	0.218825	0.225392	0.208497		786	0.246883	0.303447	0.24319
787	0.219003	0.225676	0.206645		787	0.247465	0.302954	0.244876
788	0.220861	0.225882	0.206356		788	0.248122	0.303075	0.249096
789	0.223608	0.22494	0.206622		789	0.249159	0.304306	0.249743
790	0.225459	0.224104	0.206553		790	0.248412	0.304428	0.251029
791	0.225572	0.222926	0.205336		791	0.248342	0.304448	0.252155
792	0.227369	0.220582	0.207234		792	0.250929	0.305515	0.252707
793	0.228523	0.219831	0.206587		793	0.255185	0.305956	0.252273
794	0.228405	0.218156	0.206046		794	0.259223	0.30578	0.252937
795	0.229795	0.221016	0.20638		795	0.262273	0.304182	0.25485
796	0.230611	0.224203	0.205668		796	0.264925	0.303358	0.256535
797	0.230254	0.226282	0.204343		797	0.265793	0.300883	0.258792
798	0.230788	0.228689	0.203009		798	0.26498	0.300153	0.259997
799	0.233288	0.231114	0.20371		799	0.26349	0.298992	0.261078
800	0.232924	0.232683	0.202037		800	0.263169	0.299132	0.260017
801	0.234238	0.230866	0.201759		801	0.262273	0.29876	0.262506
802	0.235723	0.230483	0.201981		802	0.263485	0.299461	0.266263
803	0.23752	0.227965	0.203484		803	0.263663	0.298581	0.266589
804	0.237534	0.227331	0.202267		804	0.265726	0.296646	0.269582
805	0.240422	0.225198	0.203346		805	0.267874	0.296766	0.273738
806	0.240851	0.225488	0.202498		806	0.26949	0.296056	0.27741
807	0.241667	0.227585	0.202483		807	0.26941	0.295707	0.275621
808	0.242664	0.229081	0.203342		808	0.271619	0.294705	0.280286
809	0.24411	0.229691	0.20286		809	0.273209	0.296023	0.280337
810	0.242253	0.229432	0.201964		810	0.272827	0.29673	0.282914
811	0.241583	0.228968	0.202771		811	0.273174	0.296161	0.283427
812	0.240827	0.229046	0.202725		812	0.273888	0.296564	0.284205
813	0.23856	0.228437	0.200838		813	0.274409	0.298475	0.284609
814	0.239208	0.229295	0.200758		814	0.272464	0.300272	0.289285
815	0.241999	0.22792	0.200173		815	0.272433	0.301743	0.290849
816	0.242364	0.226655	0.198921		816	0.272469	0.303692	0.293092
817	0.243809	0.226808	0.19712		817	0.272028	0.303516	0.298175
818	0.243852	0.225436	0.197161		818	0.272275	0.304498	0.298809
819	0.242383	0.224035	0.197843		819	0.274104	0.305515	0.299129
820	0.239329	0.224458	0.198883		820	0.273423	0.30341	0.297728
821	0.239709	0.22422	0.200023		821	0.275966	0.302484	0.300074
822	0.237851	0.221437	0.200308		822	0.276189	0.302153	0.302765
823	0.238531	0.22266	0.200589		823	0.27638	0.302277	0.306608
824	0.240096	0.222135	0.200627		824	0.27489	0.299758	0.310918
825	0.241559	0.222897	0.199467		825	0.278296	0.299489	0.31601
826	0.24203	0.225111	0.198178		826	0.278725	0.301306	0.31927
827	0.243775	0.22587	0.198565		827	0.281428	0.302396	0.324648
828	0.24376	0.227482	0.198242		828	0.282152	0.30079	0.327924
829	0.241404	0.227608	0.197761		829	0.285996	0.30132	0.331779
830	0.241532	0.226902	0.197999		830	0.284319	0.301857	0.335668
831	0.241493	0.223399	0.200104		831	0.283372	0.298244	0.340693
832	0.243073	0.223873	0.199162		832	0.283225	0.296964	0.342219
833	0.24375	0.220807	0.198867		833	0.282941	0.297393	0.345752
834	0.244177	0.220437	0.198027		834	0.279849	0.298065	0.347381
835	0.241649	0.219584	0.199016		835	0.279841	0.297687	0.348646
836	0.239229	0.22223	0.197312		836	0.280338	0.29965	0.350471
837	0.235577	0.222184	0.198633		837	0.278927	0.299489	0.347703
838	0.232063	0.224475	0.198781		838	0.278385	0.300629	0.346517
839	0.229463	0.225389	0.199863		839	0.279044	0.298307	0.342887
840	0.227697	0.22556	0.197991		840	0.281098	0.29798	0.340817
841	0.226654	0.226863	0.200233		841	0.281414	0.2983	0.334936
842	0.225277	0.227342	0.200474		842	0.281735	0.300231	0.332373
843	0.225286	0.227403	0.20038		843	0.282491	0.297737	0.328506
844	0.225299	0.229465	0.201111		844	0.282991	0.297843	0.322271
845	0.22777	0.232747	0.201671		845	0.282279	0.299343	0.316545
846	0.229921	0.232856	0.201195		846	0.280883	0.298674	0.310396
847	0.233947	0.232949	0.201238		847	0.281165	0.297865	0.305486
848	0.233732	0.234822	0.201238		848	0.280528	0.297594	0.301053
849	0.236221	0.2359	0.199257		849	0.279825	0.29678	0.299683
850	0.234959	0.235228	0.201002		850	0.278688	0.294472	0.294497
851	0.235966	0.234122	0.201208		851	0.279052	0.294013	0.286978
852	0.232631	0.235135	0.200264		852	0.277218	0.292891	0.280195
853	0.233567	0.23305	0.202062		853	0.273605	0.293009	0.275797
854	0.232335	0.231343	0.203587		854	0.274431	0.293902	0.268386
855	0.229606	0.233317	0.202207		855	0.27439	0.294766	0.265664
856	0.226506	0.234248	0.203004		856	0.27467	0.295622	0.264471
857	0.22582	0.232443	0.203978		857	0.274906	0.295973	0.263238
858	0.225674	0.231313	0.202733		858	0.277526	0.296443	0.257895
859	0.223737	0.231936	0.200791		859	0.27611	0.296625	0.256696
860	0.226627	0.22942	0.201244		860	0.276702	0.29719	0.252019
861	0.227496	0.229268	0.199998		861	0.27456	0.297163	0.247613
862	0.227982	0.231034	0.200974		862	0.276112	0.296819	0.243437
863	0.227887	0.233635	0.20014		863	0.275661	0.297613	0.241042
864	0.229247	0.232244	0.202839		864	0.275303	0.299601	0.236617
865	0.228975	0.232499	0.203594		865	0.273526	0.300075	0.233507
866	0.228973	0.233788	0.203839		866	0.273155	0.299813	0.23239
867	0.2294	0.231719	0.202939		867	0.269722	0.301384	0.232051
868	0.228508	0.228411	0.204301		868	0.268264	0.300622	0.230186
869	0.227567	0.228563	0.204659		869	0.265925	0.30164	0.230374
870	0.227238	0.227276	0.20459		870	0.265712	0.302439	0.231169
871	0.225569	0.224266	0.205646		871	0.265897	0.303759	0.229521
872	0.223635	0.224074	0.205959		872	0.266977	0.305185	0.22653
873	0.223972	0.224629	0.206881		873	0.268531	0.305942	0.225881
874	0.223744	0.220295	0.207389		874	0.269154	0.305201	0.223197
875	0.224463	0.218677	0.208523		875	0.266675	0.305425	0.223528
876	0.224053	0.218353	0.2078		876	0.266069	0.304436	0.223755
877	0.225482	0.219422	0.207292		877	0.265567	0.30333	0.225016
878	0.225702	0.219598	0.207002		878	0.262546	0.303578	0.221994
879	0.226532	0.221244	0.206622		879	0.261042	0.304238	0.221784
880	0.225613	0.223443	0.206924		880	0.261186	0.304044	0.218698
881	0.226546	0.223997	0.206984		881	0.258863	0.302624	0.216386
882	0.225881	0.223797	0.207533		882	0.256382	0.300611	0.213232
883	0.226352	0.224203	0.207784		883	0.255942	0.301216	0.215787
884	0.224927	0.227392	0.206107		884	0.254087	0.300161	0.213977
885	0.222421	0.227583	0.203793		885	0.25097	0.296357	0.213097
886	0.222078	0.227917	0.203426		886	0.248778	0.295594	0.212392
887	0.222718	0.227634	0.204206		887	0.247796	0.294717	0.213224
888	0.222609	0.227308	0.203531		888	0.245975	0.292598	0.210896
889	0.223577	0.226923	0.204607		889	0.246624	0.290784	0.211711
890	0.224753	0.22737	0.206156		890	0.247283	0.294071	0.211046
891	0.225219	0.227397	0.206435		891	0.248511	0.294666	0.211372
892	0.223689	0.225168	0.203815		892	0.24821	0.29591	0.209539
893	0.222313	0.224649	0.203982		893	0.247474	0.297075	0.209038
894	0.221526	0.224564	0.203661		894	0.245612	0.297678	0.209211
895	0.222703	0.22189	0.202453		895	0.245377	0.299102	0.207547
896	0.222273	0.220117	0.202397		896	0.242789	0.301388	0.20719
897	0.222987	0.220507	0.203257		897	0.241472	0.303325	0.206066
898	0.22398	0.222459	0.201953		898	0.241246	0.306527	0.204972
899	0.224403	0.221986	0.201402		899	0.239829	0.311437	0.204256
900	0.224274	0.22381	0.200704		900	0.238041	0.314681	0.203918
901	0.227016	0.22304	0.198629		901	0.237536	0.318578	0.203523
902	0.226743	0.223514	0.197996		902	0.235535	0.323586	0.204318
903	0.226305	0.222355	0.19717		903	0.233877	0.326722	0.204872
904	0.227788	0.220736	0.196703		904	0.234209	0.327871	0.203484
905	0.228251	0.221129	0.19695		905	0.2343	0.330634	0.205324
906	0.226269	0.222776	0.198755		906	0.233647	0.334526	0.205509
907	0.226163	0.223342	0.198912		907	0.23406	0.336117	0.206389
908	0.225752	0.223561	0.200561		908	0.232627	0.339019	0.206004
909	0.225493	0.225503	0.200162		909	0.232244	0.343218	0.206224
910	0.224614	0.225208	0.200131		910	0.2305	0.345501	0.204662
911	0.223876	0.227924	0.199958		911	0.22986	0.346676	0.20295
912	0.222607	0.228293	0.201868		912	0.228541	0.350188	0.202365
913	0.223352	0.227964	0.20146		913	0.228093	0.35428	0.202866
914	0.221661	0.228374	0.202841		914	0.224699	0.356389	0.201511
915	0.221871	0.22878	0.203785		915	0.223377	0.35775	0.200718
916	0.220823	0.227872	0.204297		916	0.221371	0.361178	0.201306
917	0.221796	0.228669	0.203847		917	0.221283	0.363983	0.20023
918	0.21952	0.230934	0.205111		918	0.219628	0.364176	0.200563
919	0.218845	0.228363	0.205879		919	0.220381	0.365931	0.200727
920	0.219077	0.227139	0.204639		920	0.220774	0.36678	0.201252
921	0.219996	0.225967	0.204715		921	0.221503	0.369271	0.201487
922	0.220863	0.224917	0.204661		922	0.219181	0.367668	0.201
923	0.221588	0.222532	0.204053		923	0.219009	0.366361	0.199591
924	0.221074	0.224419	0.202156		924	0.216402	0.365708	0.200937
925	0.221558	0.22579	0.203695		925	0.213814	0.367297	0.201609
926	0.22144	0.226179	0.204727		926	0.210993	0.366299	0.202582
927	0.220124	0.227463	0.205223		927	0.209301	0.366547	0.202782
928	0.221469	0.227618	0.205161		928	0.207129	0.368158	0.202912
929	0.222485	0.226224	0.206067		929	0.20686	0.367993	0.202253
930	0.222284	0.226694	0.205583		930	0.204691	0.366422	0.200252
931	0.22177	0.225099	0.203768		931	0.20376	0.366815	0.19837
932	0.22164	0.221207	0.205041		932	0.202461	0.367368	0.199092
933	0.220027	0.218873	0.206291		933	0.200879	0.364471	0.198047
934	0.219521	0.218232	0.207236		934	0.199043	0.363777	0.197468
935	0.218411	0.215008	0.208615		935	0.198911	0.363454	0.196397
936	0.218114	0.21431	0.209583		936	0.197926	0.362073	0.196589
937	0.219021	0.215437	0.207169		937	0.198225	0.36225	0.195928
938	0.22075	0.216632	0.205746		938	0.197503	0.364916	0.19698
939	0.221536	0.217874	0.205218		939	0.196813	0.366057	0.196826
940	0.22017	0.218974	0.204009		940	0.197001	0.367121	0.200434
941	0.220759	0.2206	0.20289		941	0.197757	0.366705	0.199869
942	0.219783	0.221086	0.202683		942	0.196806	0.365473	0.199424
943	0.219073	0.223014	0.203152		943	0.197887	0.365801	0.198895
944	0.218011	0.222791	0.200801		944	0.198641	0.364509	0.199768
945	0.21916	0.222176	0.199762		945	0.198926	0.364675	0.197727
946	0.218911	0.223515	0.199194		946	0.197832	0.364313	0.199023
947	0.220195	0.223266	0.199457		947	0.197626	0.364484	0.199707
948	0.219852	0.22191	0.1989		948	0.196172	0.361253	0.200689
949	0.220015	0.223026	0.200743		949	0.19574	0.364179	0.199349
950	0.220254	0.223249	0.201047		950	0.192965	0.362988	0.199062
951	0.221757	0.221096	0.201563		951	0.192346	0.362314	0.198591
952	0.219485	0.22247	0.201966		952	0.191295	0.36184	0.197953
953	0.21868	0.222802	0.202254		953	0.191409	0.363751	0.197601
954	0.218402	0.221964	0.201419		954	0.189217	0.358432	0.19929
955	0.216814	0.222518	0.201569		955	0.189329	0.35695	0.200423
956	0.215884	0.223309	0.202086		956	0.189847	0.355976	0.200307
957	0.217824	0.222356	0.200698		957	0.190447	0.355848	0.202161
958	0.220072	0.221204	0.199839		958	0.189566	0.353991	0.202059
959	0.219104	0.219322	0.201021		959	0.191532	0.35738	0.20156
960	0.220808	0.217571	0.200263		960	0.190855	0.356668	0.200803
961	0.220427	0.216553	0.199666		961	0.188887	0.356278	0.202812
962	0.218829	0.21611	0.199907		962	0.187939	0.354401	0.200942
963	0.217294	0.21624	0.198441		963	0.1874	0.354191	0.201639
964	0.218446	0.216489	0.196955		964	0.185883	0.351938	0.203598
965	0.216872	0.215168	0.196678		965	0.185983	0.353719	0.204805
966	0.215735	0.213544	0.196296		966	0.185727	0.356865	0.204212
967	0.215622	0.211993	0.195993		967	0.186438	0.360093	0.20433
968	0.216096	0.209944	0.197659		968	0.186413	0.361411	0.204855
969	0.214765	0.207949	0.197647		969	0.186216	0.359556	0.203725
970	0.215305	0.20813	0.197379		970	0.186323	0.355313	0.204772
971	0.214692	0.20649	0.196537		971	0.18669	0.351009	0.204346
972	0.214784	0.206319	0.197685		972	0.185758	0.346771	0.206439
973	0.211991	0.205245	0.196583		973	0.185072	0.342839	0.20553
974	0.213238	0.204566	0.197522		974	0.184345	0.343921	0.205893
975	0.212597	0.205476	0.1978		975	0.183063	0.347239	0.204264
976	0.213939	0.206441	0.198748		976	0.182226	0.344389	0.204085
977	0.214923	0.2064	0.197779		977	0.181122	0.344347	0.20501
978	0.215783	0.206142	0.196589		978	0.17937	0.346301	0.205611
979	0.214911	0.206709	0.195516		979	0.178988	0.345219	0.205752
980	0.214529	0.206066	0.195408		980	0.1791	0.33899	0.206013
981	0.213202	0.20615	0.194632		981	0.17828	0.335859	0.207452
982	0.211537	0.20601	0.194152		982	0.177514	0.331306	0.206519
983	0.209829	0.207895	0.196182		983	0.177893	0.327502	0.2062
984	0.210226	0.208984	0.196201		984	0.177597	0.32243	0.205359
985	0.209775	0.210973	0.196475		985	0.177513	0.320642	0.20628
986	0.209605	0.212051	0.195954		986	0.176456	0.318733	0.204502
987	0.207455	0.213992	0.196615		987	0.17682	0.314988	0.20301
988	0.20735	0.21395	0.197031		988	0.177337	0.309396	0.201943
989	0.206924	0.214065	0.197723		989	0.177693	0.305142	0.200522
990	0.207059	0.213815	0.198327		990	0.176743	0.303333	0.19938
991	0.206226	0.215456	0.200013		991	0.178002	0.300872	0.199502
992	0.206506	0.213982	0.199523		992	0.177852	0.299239	0.200551
993	0.207349	0.215717	0.19814		993	0.177638	0.297799	0.202333
994	0.206725	0.216009	0.198062		994	0.176497	0.296646	0.204417
995	0.206471	0.216677	0.199026		995	0.176377	0.292794	0.20622
996	0.208942	0.215089	0.196837		996	0.175678	0.291506	0.207133
997	0.209501	0.217697	0.195796		997	0.174187	0.289217	0.207323
998	0.210891	0.217372	0.195211		998	0.173773	0.285798	0.208006
999	0.210138	0.217195	0.193857		999	0.174248	0.283633	0.206439
1000	0.211135	0.218595	0.192795		1000	0.175166	0.28132	0.207328
1001	0.210638	0.217728	0.194424		1001	0.175582	0.278522	0.207997
1002	0.211829	0.216155	0.194941		1002	0.1776	0.277066	0.209185
1003	0.210403	0.214665	0.195488		1003	0.17841	0.276232	0.209403
1004	0.210222	0.214662	0.196525		1004	0.178111	0.274089	0.211408
1005	0.210694	0.211649	0.196654		1005	0.17752	0.274448	0.209791
1006	0.209611	0.211244	0.19578		1006	0.178279	0.274501	0.207918
1007	0.210225	0.211657	0.195158		1007	0.177804	0.274298	0.207671
1008	0.21035	0.211498	0.195729		1008	0.176978	0.274916	0.206462
1009	0.21041	0.21224	0.194497		1009	0.177568	0.274955	0.206737
1010	0.208079	0.21253	0.195217		1010	0.178925	0.273499	0.208697
1011	0.208751	0.213154	0.195135		1011	0.179131	0.270235	0.211723
1012	0.207484	0.212801	0.19532		1012	0.179285	0.268206	0.212319
1013	0.206962	0.213313	0.194968		1013	0.179455	0.265098	0.211713
1014	0.207511	0.212907	0.195893		1014	0.178007	0.263232	0.210218
1015	0.20738	0.212865	0.195092		1015	0.176517	0.261572	0.208527
1016	0.207374	0.213172	0.196935		1016	0.17548	0.261393	0.207796
1017	0.207702	0.211709	0.198011		1017	0.174391	0.259943	0.20811
1018	0.208024	0.210728	0.195904		1018	0.174909	0.257973	0.209331
1019	0.207874	0.210552	0.194673		1019	0.175558	0.255357	0.212699
1020	0.208865	0.210862	0.193582		1020	0.176482	0.253692	0.21365
1021	0.20952	0.210501	0.193867		1021	0.175701	0.251837	0.214668
1022	0.208709	0.210851	0.193535		1022	0.175959	0.249339	0.212015
1023	0.209074	0.211327	0.196552		1023	0.175925	0.247275	0.212561
1024	0.209437	0.20993	0.198136		1024	0.176793	0.245867	0.210082
1025	0.209779	0.207756	0.198579		1025	0.176405	0.246052	0.210204
1026	0.209332	0.206353	0.197831		1026	0.177521	0.244502	0.207826
1027	0.211402	0.207602	0.198132		1027	0.177754	0.243316	0.209851
1028	0.209881	0.206475	0.198226		1028	0.177526	0.242598	0.210731
1029	0.210725	0.205689	0.198297		1029	0.17644	0.243	0.210156
1030	0.210987	0.207278	0.198365		1030	0.176377	0.240189	0.209055
1031	0.212451	0.209261	0.198723		1031	0.1758	0.239358	0.212145
1032	0.211813	0.207564	0.199869		1032	0.175868	0.239575	0.213512
1033	0.213607	0.208892	0.199573		1033	0.175648	0.23823	0.21281
1034	0.213527	0.210129	0.200184		1034	0.176513	0.235594	0.215544
1035	0.212599	0.210096	0.200534		1035	0.176886	0.235221	0.217385
1036	0.211053	0.209531	0.200433		1036	0.177031	0.235454	0.215289
1037	0.210729	0.209153	0.200639		1037	0.177433	0.234807	0.213037
1038	0.211138	0.207403	0.200273		1038	0.176353	0.23693	0.213356
1039	0.209795	0.206463	0.199231		1039	0.176599	0.239617	0.213134
1040	0.21118	0.204987	0.198501		1040	0.1753	0.238883	0.213971
1041	0.212152	0.204673	0.197795		1041	0.175776	0.238021	0.214253
1042	0.212248	0.205717	0.198555		1042	0.175005	0.237578	0.214032
1043	0.210773	0.207693	0.199221		1043	0.175677	0.23582	0.21281
1044	0.212224	0.208241	0.198895		1044	0.17551	0.233823	0.209419
1045	0.21256	0.210367	0.198159		1045	0.176377	0.234825	0.20768
1046	0.211829	0.208515	0.198938		1046	0.176349	0.232834	0.208069
1047	0.213499	0.207933	0.196763		1047	0.177047	0.232591	0.209284
1048	0.216226	0.206455	0.195966		1048	0.177388	0.23131	0.209807
1049	0.215572	0.206676	0.197123		1049	0.177606	0.231014	0.213087
1050	0.215366	0.206128	0.198836		1050	0.177573	0.228812	0.211602
1051	0.21628	0.207226	0.19877		1051	0.178026	0.228498	0.21076
1052	0.215051	0.207294	0.198594		1052	0.178132	0.226383	0.209997
1053	0.21406	0.206344	0.198941		1053	0.178463	0.226509	0.210185
1054	0.215491	0.206249	0.198284		1054	0.177675	0.224545	0.208929
1055	0.215491	0.205589	0.199169		1055	0.178076	0.223583	0.209787
1056	0.21444	0.206417	0.197583		1056	0.176886	0.223818	0.210064
1057	0.214835	0.207869	0.197775		1057	0.176359	0.223693	0.210744
1058	0.215985	0.210229	0.197006		1058	0.176494	0.223115	0.212502
1059	0.21403	0.211789	0.198802		1059	0.177109	0.223047	0.212005
1060	0.214344	0.212691	0.197586		1060	0.177011	0.224056	0.211365
1061	0.213217	0.213855	0.198798		1061	0.177025	0.222474	0.209762
1062	0.213787	0.211669	0.19937		1062	0.177781	0.22362	0.210312
1063	0.215391	0.210512	0.200481		1063	0.177575	0.224836	0.208952
1064	0.216742	0.209744	0.19813		1064	0.176762	0.226215	0.211039
1065	0.216554	0.209026	0.197733		1065	0.175486	0.226772	0.213456
1066	0.216167	0.207448	0.197084		1066	0.175152	0.228545	0.216001
1067	0.214046	0.207902	0.195941		1067	0.174355	0.228851	0.215774
1068	0.21029	0.208395	0.194841		1068	0.174384	0.228844	0.215821
1069	0.208662	0.207185	0.195949		1069	0.173697	0.228141	0.216691
1070	0.207331	0.207618	0.194811		1070	0.173448	0.228282	0.216937
1071	0.208391	0.207747	0.193077		1071	0.174812	0.227928	0.2185
1072	0.210261	0.20788	0.193398		1072	0.174118	0.226599	0.21932
1073	0.211643	0.207375	0.194558		1073	0.173757	0.224339	0.220572
1074	0.213864	0.20939	0.192722		1074	0.175265	0.224737	0.219172
1075	0.213466	0.208894	0.194525		1075	0.175127	0.223377	0.218701
1076	0.214229	0.209156	0.195886		1076	0.173209	0.223494	0.217932
1077	0.214005	0.208723	0.195754		1077	0.173821	0.223594	0.21854
1078	0.212025	0.210153	0.195721		1078	0.173636	0.223439	0.216329
1079	0.211291	0.207948	0.197963		1079	0.172349	0.222544	0.217048
1080	0.213256	0.207927	0.196337		1080	0.173194	0.22284	0.217264
1081	0.211909	0.209278	0.1967		1081	0.175099	0.222503	0.215135
1082	0.210741	0.209598	0.196813		1082	0.175339	0.222726	0.214931
1083	0.213005	0.211414	0.195673		1083	0.174264	0.223385	0.2171
1084	0.213637	0.21194	0.194447		1084	0.175555	0.224381	0.217607
1085	0.213075	0.211736	0.196074		1085	0.175423	0.225263	0.218178
1086	0.214284	0.210104	0.194904		1086	0.175291	0.225841	0.220942
1087	0.215328	0.211102	0.194937		1087	0.175264	0.226146	0.220308
1088	0.213903	0.206604	0.195801		1088	0.174869	0.226064	0.220099
1089	0.213628	0.207882	0.194872		1089	0.174	0.224678	0.220545
1090	0.212159	0.208591	0.194683		1090	0.173935	0.224624	0.220138
1091	0.212405	0.209301	0.195235		1091	0.172497	0.223376	0.21958
1092	0.21026	0.208411	0.195242		1092	0.171461	0.223867	0.218823
1093	0.210712	0.210434	0.193583		1093	0.1725	0.22514	0.219749
1094	0.210769	0.210162	0.196103		1094	0.172246	0.227113	0.219087
1095	0.211561	0.208666	0.195878		1095	0.173142	0.227765	0.219752
1096	0.210218	0.20577	0.197549		1096	0.172884	0.231471	0.219065
1097	0.211499	0.205127	0.199976		1097	0.173385	0.231607	0.220422
1098	0.21011	0.204166	0.200224		1098	0.174217	0.234912	0.219473
1099	0.208209	0.202253	0.200556		1099	0.175614	0.235621	0.218774
1100	0.208124	0.202559	0.201844		1100	0.176898	0.236981	0.220218
1101	0.20849	0.204567	0.203073		1101	0.179536	0.236324	0.221254
1102	0.208799	0.204711	0.202349		1102	0.182113	0.238309	0.220425
1103	0.208573	0.204571	0.204856		1103	0.183096	0.237185	0.22024
1104	0.208153	0.205585	0.204039		1104	0.184233	0.238154	0.220363
1105	0.207636	0.205329	0.204327		1105	0.184249	0.238966	0.219538
1106	0.20752	0.205373	0.20369		1106	0.183725	0.241173	0.2202
1107	0.206191	0.205016	0.204223		1107	0.183604	0.24154	0.222339
1108	0.20569	0.205358	0.204033		1108	0.183758	0.242817	0.22266
1109	0.20717	0.203724	0.203559		1109	0.183502	0.243192	0.225105
1110	0.205106	0.203092	0.202729		1110	0.184679	0.242826	0.225171
1111	0.20288	0.202052	0.203742		1111	0.185968	0.241648	0.225164
1112	0.203415	0.202883	0.204132		1112	0.186429	0.24149	0.226
1113	0.202154	0.202643	0.204935		1113	0.186123	0.242082	0.226312
1114	0.201939	0.202291	0.206183		1114	0.186587	0.243127	0.228113
1115	0.204299	0.202908	0.207676		1115	0.186473	0.242396	0.23067
1116	0.205947	0.202717	0.207384		1116	0.185976	0.244354	0.232018
1117	0.20725	0.200964	0.207266		1117	0.185622	0.245464	0.2322
1118	0.209288	0.201588	0.20646		1118	0.187411	0.245945	0.234154
1119	0.208457	0.201926	0.205811		1119	0.187828	0.247058	0.232113
1120	0.208084	0.200702	0.204214		1120	0.188266	0.249439	0.23138
1121	0.208336	0.201934	0.205038		1121	0.189317	0.249285	0.232062
1122	0.206625	0.20143	0.203099		1122	0.190339	0.251862	0.232954
1123	0.205985	0.20038	0.203274		1123	0.191663	0.253742	0.234038
1124	0.204149	0.199386	0.203063		1124	0.192653	0.253886	0.236329
1125	0.202698	0.199479	0.203568		1125	0.193208	0.25636	0.237212
1126	0.201252	0.198684	0.201382		1126	0.194392	0.257442	0.238389
1127	0.199865	0.200524	0.202811		1127	0.194527	0.257629	0.236696
1128	0.200033	0.201305	0.203125		1128	0.194213	0.256348	0.23438
1129	0.199649	0.203857	0.204023		1129	0.194144	0.259292	0.233912
1130	0.199385	0.205423	0.203251		1130	0.193363	0.260004	0.231792
1131	0.199139	0.204129	0.204761		1131	0.191961	0.261546	0.22991
1132	0.198241	0.202493	0.202697		1132	0.19176	0.263619	0.230815
1133	0.19736	0.201667	0.202061		1133	0.190811	0.26646	0.231833
1134	0.198126	0.199857	0.201695		1134	0.192489	0.267329	0.229588
1135	0.196671	0.198466	0.201345		1135	0.192309	0.26749	0.229318
1136	0.196578	0.200532	0.200633		1136	0.192859	0.268435	0.228753
1137	0.1983	0.199753	0.201445		1137	0.194449	0.267403	0.228498
1138	0.198706	0.198675	0.200238		1138	0.194958	0.267314	0.228593
1139	0.19843	0.198804	0.200311		1139	0.192634	0.26696	0.228842
1140	0.199849	0.200115	0.201704		1140	0.192176	0.26642	0.229963
1141	0.199975	0.198567	0.200969		1141	0.191984	0.267866	0.231457
1142	0.197581	0.198949	0.199959		1142	0.18985	0.270311	0.233616
1143	0.196274	0.198623	0.199602		1143	0.190629	0.272441	0.237025
1144	0.195211	0.198088	0.199243		1144	0.191576	0.275241	0.238938
1145	0.19437	0.194819	0.196913		1145	0.192691	0.278498	0.242017
1146	0.193331	0.193966	0.195461		1146	0.19446	0.278609	0.244204
1147	0.194211	0.192806	0.195895		1147	0.196085	0.2796	0.243494
1148	0.196337	0.193675	0.196913		1148	0.194863	0.280149	0.241904
1149	0.196976	0.191878	0.197451		1149	0.194331	0.278973	0.243331
1150	0.197207	0.193017	0.199903		1150	0.193635	0.277798	0.242792
1151	0.196846	0.192791	0.20049		1151	0.190665	0.277466	0.244079
1152	0.198514	0.194387	0.200929		1152	0.18784	0.274818	0.248017
1153	0.196398	0.193885	0.201232		1153	0.187174	0.274056	0.248861
1154	0.198292	0.195108	0.199993		1154	0.186428	0.273222	0.249868
1155	0.199856	0.196461	0.198238		1155	0.186419	0.2707	0.252887
1156	0.20111	0.197442	0.197159		1156	0.187313	0.269407	0.254827
1157	0.201207	0.197448	0.196535		1157	0.188298	0.269377	0.254837
1158	0.20216	0.196105	0.194293		1158	0.188508	0.271257	0.258246
1159	0.201338	0.195862	0.192434		1159	0.188564	0.271922	0.262171
1160	0.201576	0.195774	0.192884		1160	0.187716	0.274433	0.262238
1161	0.202271	0.195046	0.194122		1161	0.187529	0.277102	0.261408
1162	0.203189	0.195561	0.195215		1162	0.186388	0.278207	0.262197
1163	0.20417	0.197405	0.194141		1163	0.185718	0.27397	0.261986
1164	0.203201	0.199742	0.195896		1164	0.184341	0.27314	0.261821
1165	0.203586	0.197307	0.19497		1165	0.183733	0.272341	0.263492
1166	0.202792	0.198266	0.19629		1166	0.182962	0.270192	0.266169
1167	0.201617	0.196766	0.195867		1167	0.182633	0.267916	0.268902
1168	0.200862	0.195933	0.198696		1168	0.182142	0.268579	0.2717
1169	0.202957	0.194166	0.198736		1169	0.181098	0.267513	0.273873
1170	0.200989	0.194896	0.198832		1170	0.180711	0.266365	0.274391
1171	0.199968	0.193204	0.197232		1171	0.180327	0.266206	0.27856
1172	0.199246	0.194057	0.196763		1172	0.180725	0.265125	0.280957
1173	0.197186	0.195116	0.196998		1173	0.181558	0.265257	0.283667
1174	0.195343	0.19438	0.196838		1174	0.183944	0.263613	0.284462
1175	0.196367	0.19458	0.199162		1175	0.185628	0.263546	0.288466
1176	0.198044	0.194201	0.200415		1176	0.186242	0.261543	0.288592
1177	0.197615	0.194596	0.202922		1177	0.18719	0.263535	0.288216
1178	0.200344	0.192657	0.201206		1178	0.188792	0.261625	0.291147
1179	0.20093	0.192397	0.202329		1179	0.189482	0.261507	0.294819
1180	0.201827	0.192156	0.201221		1180	0.190576	0.258469	0.297864
1181	0.20029	0.194151	0.201611		1181	0.192753	0.256777	0.300408
1182	0.202766	0.193492	0.199774		1182	0.193983	0.254119	0.301631
1183	0.203846	0.194436	0.202491		1183	0.194266	0.252694	0.300591
1184	0.205336	0.19528	0.202441		1184	0.193419	0.252387	0.300482
1185	0.205506	0.195406	0.203533		1185	0.192006	0.25332	0.299809
1186	0.207288	0.194116	0.202711		1186	0.190232	0.252716	0.298565
1187	0.206287	0.194109	0.201613		1187	0.188449	0.253679	0.301531
1188	0.204741	0.19294	0.20083		1188	0.186767	0.253536	0.304183
1189	0.205286	0.193887	0.201907		1189	0.185955	0.254149	0.302894
1190	0.204385	0.195335	0.201504		1190	0.185831	0.254165	0.301977
1191	0.205584	0.198369	0.201015		1191	0.185455	0.253751	0.300573
1192	0.206206	0.198706	0.202196		1192	0.184528	0.250629	0.299101
1193	0.207251	0.199779	0.202727		1193	0.182901	0.248838	0.297416
1194	0.206257	0.199391	0.200577		1194	0.182907	0.246907	0.298928
1195	0.208059	0.197834	0.199025		1195	0.18189	0.246137	0.298749
1196	0.207785	0.195714	0.198006		1196	0.18142	0.24789	0.302563
1197	0.208584	0.195995	0.197839		1197	0.181674	0.249461	0.303598
1198	0.209801	0.196864	0.196781		1198	0.183664	0.250922	0.306624
1199	0.208861	0.196854	0.196407		1199	0.18275	0.25038	0.306553
1200	0.207419	0.1968	0.198395		1200	0.183518	0.249758	0.306649
1201	0.207378	0.196324	0.197464		1201	0.183719	0.249508	0.30233
1202	0.208866	0.196479	0.198206		1202	0.18406	0.248041	0.298655
1203	0.208778	0.194947	0.198432		1203	0.184278	0.248022	0.29117
1204	0.21153	0.193092	0.199224		1204	0.184922	0.248393	0.289353
1205	0.210791	0.194162	0.198298		1205	0.183904	0.248225	0.288056
1206	0.212359	0.19368	0.200577		1206	0.184136	0.246872	0.285195
1207	0.210484	0.194454	0.199517		1207	0.18427	0.247518	0.282903
1208	0.210121	0.195113	0.199789		1208	0.183787	0.246127	0.280573
1209	0.209745	0.196731	0.201077		1209	0.184826	0.243651	0.278311
1210	0.212353	0.195385	0.202475		1210	0.186086	0.243368	0.273834
1211	0.21016	0.194386	0.202463		1211	0.186593	0.242042	0.273237
1212	0.212976	0.191596	0.204524		1212	0.188313	0.239491	0.273087
1213	0.213007	0.191087	0.205457		1213	0.188444	0.238054	0.271441
1214	0.213772	0.191446	0.20508		1214	0.189957	0.238262	0.267959
1215	0.2133	0.190565	0.203219		1215	0.191366	0.236159	0.269041
1216	0.214729	0.191376	0.204652		1216	0.192229	0.236216	0.266622
1217	0.213519	0.191634	0.203896		1217	0.193891	0.236126	0.262957
1218	0.214596	0.190534	0.201638		1218	0.194995	0.237242	0.260913
1219	0.216296	0.189254	0.202054		1219	0.195124	0.238102	0.259677
1220	0.216079	0.191025	0.202947		1220	0.195283	0.238742	0.256669
1221	0.217977	0.19162	0.203236		1221	0.196149	0.238305	0.254042
1222	0.218594	0.193029	0.201774		1222	0.195602	0.239428	0.253745
1223	0.220281	0.193908	0.20407		1223	0.19554	0.238246	0.253351
1224	0.219499	0.194289	0.200572		1224	0.195413	0.237177	0.250203
1225	0.223926	0.19466	0.197882		1225	0.196541	0.237166	0.248269
1226	0.223881	0.195755	0.195353		1226	0.197037	0.235777	0.245819
1227	0.224115	0.194914	0.196118		1227	0.195198	0.236213	0.243031
1228	0.223946	0.195629	0.196571		1228	0.195808	0.236929	0.240494
1229	0.223409	0.19597	0.197429		1229	0.195399	0.237667	0.238655
1230	0.218693	0.194374	0.198516		1230	0.194149	0.23811	0.235813
1231	0.218333	0.193609	0.201283		1231	0.192471	0.239941	0.236838
1232	0.217945	0.192262	0.198163		1232	0.193417	0.239232	0.235208
1233	0.217042	0.191924	0.196452		1233	0.191384	0.239428	0.235573
1234	0.216606	0.191377	0.198415		1234	0.191418	0.238959	0.235481
1235	0.217258	0.192935	0.199425		1235	0.190241	0.23966	0.23548
1236	0.216511	0.191827	0.197718		1236	0.189578	0.239835	0.234236
1237	0.214687	0.191609	0.200373		1237	0.188016	0.240396	0.232527
1238	0.214434	0.191569	0.199919		1238	0.188456	0.241129	0.232586
1239	0.213603	0.192735	0.198857		1239	0.186557	0.241236	0.233182
1240	0.213848	0.192047	0.198198		1240	0.186856	0.240933	0.232652
1241	0.213047	0.193324	0.197271		1241	0.185809	0.241238	0.231982
1242	0.214042	0.194901	0.19649		1242	0.185729	0.242173	0.232827
1243	0.212345	0.195309	0.194571		1243	0.185918	0.241438	0.23293
1244	0.212383	0.194687	0.193938		1244	0.186874	0.240609	0.231735
1245	0.213015	0.193804	0.193363		1245	0.185358	0.239947	0.231365
1246	0.21208	0.195205	0.194887		1246	0.184796	0.238035	0.232488
1247	0.21145	0.195606	0.195496		1247	0.183857	0.237476	0.235613
1248	0.212024	0.196001	0.196889		1248	0.183251	0.23755	0.235729
1249	0.211795	0.197173	0.196845		1249	0.182574	0.237793	0.23704
1250	0.209883	0.199021	0.197803		1250	0.18343	0.236454	0.237611
1251	0.209196	0.198656	0.196569		1251	0.182791	0.23538	0.23795
1252	0.207564	0.198968	0.19641		1252	0.182467	0.234009	0.235754
1253	0.206582	0.19919	0.19749		1253	0.180637	0.231673	0.233617
1254	0.205811	0.197975	0.197014		1254	0.179946	0.232768	0.23508
1255	0.204928	0.196031	0.196524		1255	0.178013	0.233942	0.237633
1256	0.205696	0.194654	0.196668		1256	0.177983	0.236391	0.238546
1257	0.206679	0.194811	0.195672		1257	0.177575	0.235662	0.24032
1258	0.207437	0.193103	0.194665		1258	0.18033	0.238998	0.243628
1259	0.207733	0.19416	0.196415		1259	0.18098	0.238377	0.24283
1260	0.208737	0.19451	0.195684		1260	0.184028	0.239189	0.241487
1261	0.210913	0.193096	0.194645		1261	0.186786	0.238189	0.241615
1262	0.211795	0.192454	0.196559		1262	0.190438	0.239585	0.240998
1263	0.210934	0.192901	0.196521		1263	0.192105	0.238618	0.241111
1264	0.211821	0.192405	0.195479		1264	0.195208	0.240356	0.243422
1265	0.212379	0.193547	0.197491		1265	0.197232	0.239222	0.244434
1266	0.210643	0.196112	0.198808		1266	0.199359	0.241487	0.24644
1267	0.21085	0.195229	0.19873		1267	0.201812	0.241434	0.247248
1268	0.212279	0.197436	0.198699		1268	0.203653	0.241348	0.247145
1269	0.211713	0.197697	0.199853		1269	0.206201	0.240742	0.245815
1270	0.213033	0.197918	0.198809		1270	0.209025	0.242955	0.245255
1271	0.213896	0.197241	0.197457		1271	0.21215	0.243053	0.2408
1272	0.213707	0.200024	0.197542		1272	0.212469	0.244036	0.240055
1273	0.214058	0.198665	0.198351		1273	0.213749	0.24584	0.239135
1274	0.21467	0.198082	0.197556		1274	0.213838	0.245411	0.240633
1275	0.213583	0.198185	0.196525		1275	0.213751	0.245499	0.238088
1276	0.213493	0.199155	0.197032		1276	0.213836	0.245795	0.240727
1277	0.214087	0.196932	0.197544		1277	0.215032	0.246605	0.23966
1278	0.213812	0.197659	0.199479		1278	0.215348	0.246676	0.240414
1279	0.214715	0.197847	0.200367		1279	0.217048	0.250007	0.238028
1280	0.215669	0.198047	0.200348		1280	0.217874	0.252542	0.23918
1281	0.217616	0.196982	0.199993		1281	0.219148	0.254262	0.238027
1282	0.2204	0.200176	0.199467		1282	0.220234	0.255832	0.240609
1283	0.220727	0.20048	0.198456		1283	0.221507	0.255837	0.239812
1284	0.221654	0.20165	0.198232		1284	0.222253	0.256254	0.242121
1285	0.224273	0.202335	0.199818		1285	0.223852	0.257138	0.244484
1286	0.223696	0.202178	0.201208		1286	0.223456	0.259128	0.244869
1287	0.22181	0.199445	0.200722		1287	0.224982	0.25875	0.244038
1288	0.223078	0.200469	0.198759		1288	0.225719	0.259968	0.24392
1289	0.222118	0.200363	0.198398		1289	0.226412	0.258243	0.244762
1290	0.218509	0.199064	0.19802		1290	0.226063	0.258065	0.246569
1291	0.217548	0.199038	0.197465		1291	0.226341	0.256563	0.250209
1292	0.214971	0.199338	0.196206		1292	0.225656	0.257922	0.253252
1293	0.213479	0.196797	0.197378		1293	0.224848	0.2568	0.258088
1294	0.212005	0.195037	0.197886		1294	0.223045	0.258236	0.258439
1295	0.210943	0.194802	0.197654		1295	0.223193	0.256996	0.259006
1296	0.20843	0.194691	0.198515		1296	0.222725	0.256293	0.257266
1297	0.209134	0.194297	0.20046		1297	0.222436	0.25511	0.25536
1298	0.208118	0.194657	0.20158		1298	0.222155	0.257451	0.2546
1299	0.208777	0.195605	0.201137		1299	0.223431	0.259693	0.253724
1300	0.210728	0.195669	0.199795		1300	0.221751	0.260632	0.252579
1301	0.213741	0.196676	0.199627		1301	0.221276	0.259384	0.254664
1302	0.212469	0.195395	0.198673		1302	0.218859	0.260287	0.255387
1303	0.211972	0.194883	0.19755		1303	0.217739	0.260224	0.254644
1304	0.210093	0.193972	0.197714		1304	0.216181	0.258377	0.253999
1305	0.208576	0.195568	0.199111		1305	0.215728	0.258719	0.254263
1306	0.206398	0.196085	0.197133		1306	0.216985	0.261735	0.254703
1307	0.208827	0.197018	0.197399		1307	0.219209	0.261327	0.255711
1308	0.209601	0.196757	0.196858		1308	0.21979	0.262891	0.255684
1309	0.21087	0.196103	0.197258		1309	0.21999	0.261824	0.255496
1310	0.211563	0.194403	0.197184		1310	0.220041	0.261224	0.254737
1311	0.211808	0.192486	0.198006		1311	0.218674	0.259724	0.252646
1312	0.210443	0.194014	0.19764		1312	0.21721	0.258005	0.2521
1313	0.209602	0.194393	0.197579		1313	0.216645	0.255156	0.251283
1314	0.208151	0.197265	0.196612		1314	0.216593	0.255736	0.252697
1315	0.207467	0.200401	0.195209		1315	0.217456	0.254461	0.251999
1316	0.205883	0.202246	0.19556		1316	0.218991	0.253966	0.25029
1317	0.205246	0.202275	0.194904		1317	0.221441	0.257264	0.249274
1318	0.206365	0.203582	0.195396		1318	0.224231	0.256219	0.249651
1319	0.207881	0.202955	0.196377		1319	0.226857	0.254553	0.248604
1320	0.208707	0.199286	0.199297		1320	0.228653	0.253712	0.250401
1321	0.209624	0.197189	0.200017		1321	0.227717	0.251469	0.252281
1322	0.210238	0.196494	0.202178		1322	0.227557	0.247521	0.253073
1323	0.210213	0.194731	0.201564		1323	0.227318	0.247855	0.252613
1324	0.209421	0.194581	0.200522		1324	0.226889	0.247424	0.252786
1325	0.209675	0.194985	0.198425		1325	0.22685	0.24555	0.250623
1326	0.210003	0.195365	0.198984		1326	0.229403	0.246575	0.249311
1327	0.209178	0.195614	0.197835		1327	0.230448	0.246291	0.249042
1328	0.208299	0.197598	0.198595		1328	0.232316	0.245467	0.24754
1329	0.210206	0.196553	0.200418		1329	0.234639	0.242718	0.246312
1330	0.208154	0.19561	0.201		1330	0.237695	0.24375	0.24623
1331	0.207676	0.197859	0.200105		1331	0.239022	0.243565	0.245407
1332	0.209191	0.196098	0.200518		1332	0.242499	0.243751	0.245275
1333	0.208557	0.194021	0.200448		1333	0.245082	0.243467	0.245448
1334	0.206304	0.193644	0.199626		1334	0.245344	0.245805	0.245594
1335	0.208168	0.194467	0.19916		1335	0.24579	0.244992	0.246927
1336	0.20829	0.190211	0.198562		1336	0.248251	0.243386	0.249031
1337	0.206584	0.190501	0.198044		1337	0.248071	0.242919	0.2461
1338	0.206548	0.190759	0.19737		1338	0.246448	0.24216	0.246103
1339	0.206277	0.191255	0.19683		1339	0.245889	0.24159	0.246735
1340	0.205212	0.190274	0.197847		1340	0.246307	0.242212	0.243677
1341	0.20432	0.190542	0.196844		1341	0.24542	0.241388	0.239923
1342	0.202709	0.19292	0.196548		1342	0.243928	0.241096	0.242164
1343	0.201427	0.191219	0.197977		1343	0.244697	0.240908	0.243381
1344	0.200851	0.190622	0.196585		1344	0.245433	0.240087	0.242829
1345	0.199959	0.191729	0.195507		1345	0.245254	0.239522	0.245802
1346	0.201749	0.194689	0.196538		1346	0.244399	0.240104	0.249864
1347	0.202646	0.192142	0.195448		1347	0.24619	0.239501	0.249025
1348	0.202834	0.194902	0.195126		1348	0.247453	0.239918	0.249047
1349	0.202871	0.195541	0.19617		1349	0.248181	0.240068	0.248823
1350	0.202252	0.196782	0.197802		1350	0.249159	0.240361	0.25007
1351	0.198598	0.19526	0.199166		1351	0.250333	0.241888	0.248872
1352	0.200139	0.195456	0.201243		1352	0.250629	0.243844	0.249018
1353	0.20154	0.194423	0.200259		1353	0.250862	0.244433	0.24916
1354	0.201652	0.195064	0.200719		1354	0.250316	0.245353	0.252203
1355	0.20224	0.193578	0.200024		1355	0.252527	0.244835	0.251472
1356	0.203824	0.192471	0.199726		1356	0.25217	0.244666	0.253467
1357	0.203336	0.191936	0.199359		1357	0.251263	0.244545	0.256167
1358	0.201703	0.1914	0.198565		1358	0.250218	0.245451	0.257187
1359	0.201542	0.188721	0.198494		1359	0.250405	0.245742	0.255582
1360	0.201951	0.186949	0.198913		1360	0.246648	0.245612	0.254953
1361	0.201605	0.187947	0.198286		1361	0.24626	0.245698	0.253908
1362	0.200374	0.187861	0.199579		1362	0.246502	0.245692	0.254224
1363	0.202949	0.187591	0.200109		1363	0.244773	0.244511	0.253114
1364	0.202556	0.187278	0.199788		1364	0.242166	0.245211	0.255692
1365	0.201607	0.188556	0.198414		1365	0.240406	0.247118	0.256941
1366	0.201694	0.187972	0.199371		1366	0.237515	0.245899	0.258384
1367	0.201744	0.186126	0.197889		1367	0.236049	0.243678	0.257352
1368	0.199683	0.18487	0.198637		1368	0.235461	0.243054	0.258924
1369	0.199702	0.184829	0.197813		1369	0.235604	0.240995	0.256552
1370	0.199664	0.183696	0.198814		1370	0.234774	0.240173	0.255862
1371	0.200531	0.181876	0.198115		1371	0.235285	0.239061	0.253923
1372	0.199501	0.18238	0.19991		1372	0.23333	0.241377	0.255162
1373	0.199361	0.181871	0.199969		1373	0.231416	0.242459	0.257093
1374	0.198026	0.181495	0.201693		1374	0.230896	0.243958	0.257897
1375	0.197795	0.180454	0.200747		1375	0.231585	0.243142	0.259861
1376	0.196895	0.180944	0.20043		1376	0.229808	0.244561	0.262686
1377	0.197225	0.182562	0.200123		1377	0.230144	0.243207	0.262062
1378	0.195483	0.183139	0.199248		1378	0.230741	0.243797	0.262029
1379	0.196588	0.182774	0.197687		1379	0.229319	0.242979	0.263039
1380	0.196648	0.184708	0.198571		1380	0.227941	0.244286	0.264319
1381	0.195422	0.184733	0.198236		1381	0.229068	0.244572	0.263235
1382	0.194378	0.183876	0.19593		1382	0.22696	0.245706	0.264529
1383	0.193764	0.185606	0.195053		1383	0.225837	0.245855	0.263978
1384	0.192663	0.187429	0.195806		1384	0.224182	0.246185	0.265114
1385	0.191147	0.186448	0.195079		1385	0.221905	0.246108	0.263934
1386	0.19143	0.184977	0.195501		1386	0.21885	0.245851	0.264222
1387	0.190952	0.185711	0.194867		1387	0.218133	0.24517	0.262869
1388	0.191349	0.183279	0.195421		1388	0.216541	0.242402	0.262924
1389	0.191203	0.18309	0.195196		1389	0.217068	0.24169	0.26231
1390	0.192806	0.182855	0.196069		1390	0.217194	0.240468	0.263073
1391	0.192103	0.185309	0.196336		1391	0.217341	0.240958	0.262454
1392	0.194575	0.18559	0.19804		1392	0.216709	0.239373	0.263571
1393	0.196727	0.186899	0.198977		1393	0.215987	0.240812	0.263008
1394	0.196907	0.186908	0.19975		1394	0.214814	0.240578	0.26125
1395	0.196064	0.187676	0.20047		1395	0.213396	0.24004	0.259939
1396	0.197464	0.188476	0.200526		1396	0.212436	0.238784	0.259431
1397	0.196416	0.188133	0.199982		1397	0.212511	0.239326	0.257833
1398	0.194852	0.189637	0.201122		1398	0.211923	0.238415	0.256854
1399	0.193853	0.189544	0.201376		1399	0.212292	0.240185	0.254384
1400	0.193406	0.189285	0.200411		1400	0.213029	0.240844	0.250936
1401	0.193562	0.189244	0.200493		1401	0.212383	0.242806	0.249301
1402	0.193369	0.188043	0.202245		1402	0.211685	0.242296	0.246702
1403	0.193581	0.188187	0.198801		1403	0.210708	0.242549	0.24409
1404	0.195134	0.187694	0.199923		1404	0.210245	0.241087	0.245046
1405	0.195386	0.188422	0.200299		1405	0.209246	0.24074	0.243229
1406	0.195715	0.187859	0.19914		1406	0.20822	0.239377	0.243678
1407	0.195968	0.190194	0.197785		1407	0.206761	0.238548	0.24552
1408	0.196321	0.18881	0.19935		1408	0.206621	0.238849	0.246076
1409	0.197256	0.189509	0.197674		1409	0.204898	0.238717	0.24414
1410	0.19813	0.189814	0.197157		1410	0.203856	0.23796	0.24607
1411	0.197519	0.189053	0.197648		1411	0.205478	0.238658	0.245456
1412	0.197175	0.186485	0.196263		1412	0.206682	0.239581	0.243449
1413	0.196582	0.185207	0.195713		1413	0.206523	0.238386	0.241428
1414	0.197138	0.184938	0.196175		1414	0.207479	0.237475	0.242086
1415	0.198453	0.184614	0.195795		1415	0.207228	0.237343	0.24157
1416	0.197628	0.184292	0.196083		1416	0.204987	0.237386	0.239287
1417	0.197759	0.185259	0.19776		1417	0.202729	0.23757	0.239491
1418	0.197199	0.186477	0.201112		1418	0.202813	0.237314	0.240667
1419	0.195157	0.1855	0.199359		1419	0.201183	0.23874	0.241323
1420	0.194074	0.185492	0.199566		1420	0.201133	0.237715	0.240534
1421	0.195429	0.185953	0.199076		1421	0.201257	0.236361	0.242085
1422	0.194774	0.184607	0.197911		1422	0.201469	0.23638	0.243656
1423	0.196719	0.183	0.195019		1423	0.201048	0.236272	0.242794
1424	0.197035	0.181722	0.196703		1424	0.201089	0.234831	0.242087
1425	0.196328	0.180397	0.195516		1425	0.200782	0.233676	0.244316
1426	0.195497	0.179729	0.19486		1426	0.201056	0.232631	0.24413
1427	0.196349	0.180972	0.194695		1427	0.200731	0.232801	0.241186
1428	0.194461	0.180464	0.194885		1428	0.200422	0.232132	0.242281
1429	0.194683	0.181706	0.194591		1429	0.199476	0.232201	0.241366
1430	0.196262	0.182619	0.194712		1430	0.197402	0.233745	0.239931
1431	0.195884	0.182966	0.195614		1431	0.19662	0.23319	0.239588
1432	0.196023	0.182477	0.196376		1432	0.195959	0.232531	0.240812
1433	0.198336	0.18279	0.196576		1433	0.194329	0.232711	0.240615
1434	0.197862	0.183701	0.193821		1434	0.194002	0.23197	0.239992
1435	0.195753	0.183121	0.195421		1435	0.194484	0.233609	0.23868
1436	0.197673	0.182495	0.196371		1436	0.192037	0.235769	0.238843
1437	0.199296	0.181801	0.196878		1437	0.19258	0.234837	0.237525
1438	0.1982	0.183232	0.196714		1438	0.190542	0.235508	0.235535
1439	0.199927	0.182056	0.198828		1439	0.188891	0.235953	0.236178
1440	0.201433	0.180234	0.19834		1440	0.187566	0.234408	0.236931
1441	0.201904	0.178225	0.199305		1441	0.187805	0.234451	0.236792
1442	0.201382	0.177033	0.200716		1442	0.185871	0.235474	0.238411
1443	0.202235	0.175518	0.201869		1443	0.186882	0.234133	0.239021
1444	0.202435	0.176651	0.20509		1444	0.18758	0.233529	0.237122
1445	0.202944	0.178115	0.208096		1445	0.186545	0.23403	0.237033
1446	0.203401	0.179932	0.208917		1446	0.185706	0.234541	0.236172
1447	0.203018	0.181209	0.210581		1447	0.185364	0.233886	0.233841
1448	0.204331	0.181469	0.212656		1448	0.184318	0.235368	0.231674
1449	0.20596	0.180093	0.21333		1449	0.183002	0.236318	0.232926
1450	0.207358	0.180786	0.213156		1450	0.183186	0.236249	0.231865
1451	0.207419	0.181065	0.213557		1451	0.183521	0.23559	0.231557
1452	0.209384	0.180841	0.213265		1452	0.183034	0.235391	0.231128
1453	0.208856	0.180449	0.211572		1453	0.183287	0.234864	0.233011
1454	0.208792	0.180797	0.210151		1454	0.183526	0.234281	0.232262
1455	0.209204	0.178436	0.209089		1455	0.183756	0.233582	0.233652
1456	0.208893	0.177473	0.206802		1456	0.183396	0.23359	0.235757
1457	0.20766	0.177429	0.206376		1457	0.182605	0.233376	0.237839
1458	0.207226	0.17819	0.206814		1458	0.182146	0.233726	0.240388
1459	0.204844	0.178503	0.206827		1459	0.180966	0.234492	0.242318
1460	0.203518	0.179955	0.207178		1460	0.179969	0.236274	0.241515
1461	0.2031	0.181834	0.210055		1461	0.179568	0.236511	0.241048
1462	0.204395	0.182749	0.208623		1462	0.179603	0.239516	0.243021
1463	0.204344	0.182016	0.208906		1463	0.180383	0.240171	0.242563
1464	0.204677	0.182093	0.210698		1464	0.180161	0.240589	0.242689
1465	0.205319	0.183008	0.212106		1465	0.181568	0.23913	0.245293
1466	0.204094	0.182765	0.211505		1466	0.182293	0.237765	0.24706
1467	0.202085	0.181653	0.212372		1467	0.183797	0.237476	0.245182
1468	0.201691	0.183562	0.211898		1468	0.182972	0.238061	0.246489
1469	0.203067	0.184179	0.210821		1469	0.184299	0.238789	0.248006
1470	0.202297	0.18361	0.209441		1470	0.183832	0.239623	0.245101
1471	0.205097	0.183635	0.209163		1471	0.181795	0.240746	0.246797
1472	0.203509	0.185286	0.210315		1472	0.179814	0.237807	0.24644
1473	0.204838	0.183645	0.211766		1473	0.179887	0.236705	0.243774
1474	0.204635	0.183195	0.211396		1474	0.178755	0.235066	0.242625
1475	0.204233	0.182852	0.21057		1475	0.177571	0.235049	0.244753
1476	0.202627	0.183583	0.207636		1476	0.178071	0.233247	0.242186
1477	0.204849	0.182716	0.206664		1477	0.178706	0.23194	0.242784
1478	0.203212	0.184666	0.204204		1478	0.178189	0.232534	0.24436
1479	0.201898	0.185214	0.201016		1479	0.179291	0.232025	0.244817
1480	0.201078	0.185091	0.19978		1480	0.179955	0.231227	0.244688
1481	0.200308	0.183998	0.200985		1481	0.180756	0.231813	0.243934
1482	0.199915	0.183726	0.198717		1482	0.18006	0.234418	0.245939
1483	0.200721	0.182148	0.199269		1483	0.181502	0.234579	0.246811
1484	0.201265	0.18156	0.200417		1484	0.180974	0.23386	0.246928
1485	0.200658	0.182574	0.200382		1485	0.181872	0.235144	0.247348
1486	0.200298	0.182801	0.19948		1486	0.181968	0.235408	0.246417
1487	0.199111	0.183037	0.199726		1487	0.182534	0.236348	0.244646
1488	0.199032	0.183112	0.198713		1488	0.180774	0.237264	0.245077
1489	0.197999	0.182364	0.197372		1489	0.180657	0.239859	0.245202
1490	0.198747	0.182872	0.197897		1490	0.178983	0.239094	0.243645
1491	0.19807	0.183359	0.198697		1491	0.177933	0.237555	0.245251
1492	0.198411	0.183553	0.200018		1492	0.176257	0.236517	0.244758
1493	0.196918	0.183659	0.201693		1493	0.175988	0.235875	0.244467
1494	0.1959	0.184271	0.203441		1494	0.17457	0.233609	0.243686
1495	0.195786	0.183051	0.201954		1495	0.17421	0.233659	0.244141
1496	0.197836	0.182479	0.201358		1496	0.174989	0.236084	0.24524
1497	0.198001	0.181305	0.199164		1497	0.174991	0.236732	0.246293
1498	0.197558	0.181423	0.198695		1498	0.174156	0.236531	0.244271
1499	0.198959	0.181487	0.199308		1499	0.174228	0.236832	0.245142
1500	0.198783	0.181757	0.199713		1500	0.17385	0.237095	0.245044
1501	0.195887	0.181345	0.200881		1501	0.172115	0.236454	0.244765
1502	0.195106	0.180847	0.201247		1502	0.172076	0.235017	0.246607
1503	0.196434	0.181278	0.200891		1503	0.171393	0.232463	0.247517
1504	0.196791	0.180047	0.199863		1504	0.171308	0.232876	0.246905
1505	0.196758	0.17862	0.201422		1505	0.171801	0.231177	0.249195
1506	0.199544	0.178859	0.199337		1506	0.171909	0.22954	0.248104
1507	0.199075	0.180047	0.200913		1507	0.172273	0.230405	0.247634
1508	0.198157	0.180573	0.202706		1508	0.172972	0.23244	0.248744
1509	0.198386	0.182249	0.204415		1509	0.173497	0.230546	0.251424
1510	0.19856	0.183892	0.203988		1510	0.17333	0.230973	0.250644
1511	0.197712	0.183167	0.205833		1511	0.173094	0.230549	0.250959
1512	0.200214	0.184883	0.205902		1512	0.173014	0.230606	0.248886
1513	0.200616	0.185546	0.205687		1513	0.17315	0.229498	0.250113
1514	0.201462	0.185834	0.206123		1514	0.17205	0.231521	0.248115
1515	0.201171	0.185333	0.208297		1515	0.171417	0.230851	0.248904
1516	0.202759	0.186512	0.210916		1516	0.172071	0.23237	0.253387
1517	0.202796	0.186732	0.210958		1517	0.171443	0.232463	0.255951
1518	0.202928	0.186413	0.211904		1518	0.172197	0.232705	0.25689
1519	0.200507	0.186339	0.21045		1519	0.172034	0.231423	0.259137
1520	0.201293	0.18711	0.208055		1520	0.172452	0.231102	0.259421
1521	0.198511	0.187253	0.204911		1521	0.171946	0.229493	0.258534
1522	0.198848	0.185195	0.205469		1522	0.172388	0.228781	0.25862
1523	0.199732	0.182184	0.203698		1523	0.170978	0.229395	0.25688
1524	0.199886	0.180942	0.204426		1524	0.170851	0.227819	0.256151
1525	0.200449	0.180631	0.205267		1525	0.17043	0.228075	0.256953
1526	0.201204	0.179748	0.204545		1526	0.170347	0.228845	0.253745
1527	0.201017	0.181258	0.203804		1527	0.171773	0.226493	0.254698
1528	0.20131	0.182	0.203512		1528	0.171705	0.223236	0.255404
1529	0.204946	0.181676	0.202922		1529	0.172381	0.22434	0.254037
1530	0.204902	0.181748	0.203204		1530	0.171942	0.223787	0.254167
1531	0.206433	0.181339	0.204141		1531	0.172224	0.22317	0.255226
1532	0.205982	0.180471	0.204377		1532	0.170839	0.223173	0.255267
1533	0.205959	0.180034	0.205116		1533	0.172218	0.222234	0.255705
1534	0.205077	0.181211	0.20396		1534	0.171668	0.221478	0.25744
1535	0.207189	0.180845	0.202983		1535	0.171785	0.22135	0.257438
1536	0.207588	0.181353	0.203147		1536	0.17119	0.221302	0.256786
1537	0.209143	0.179637	0.201146		1537	0.170318	0.222318	0.25575
1538	0.209778	0.181342	0.199982		1538	0.169146	0.223037	0.25581
1539	0.20954	0.180356	0.200365		1539	0.169564	0.223786	0.255742
1540	0.208508	0.179788	0.199994		1540	0.169425	0.223676	0.254279
1541	0.206789	0.179832	0.199417		1541	0.168564	0.222202	0.255764
1542	0.206034	0.182717	0.201965		1542	0.169053	0.222453	0.255733
1543	0.207295	0.181893	0.201369		1543	0.168843	0.223617	0.257756
1544	0.206993	0.181329	0.201327		1544	0.168299	0.224833	0.257854
1545	0.205771	0.182239	0.201855		1545	0.168566	0.22628	0.258427
1546	0.208498	0.181362	0.202506		1546	0.169385	0.229202	0.256124
1547	0.20885	0.180507	0.202006		1547	0.168686	0.22976	0.25757
1548	0.208767	0.180878	0.203699		1548	0.168661	0.230984	0.254301
1549	0.207966	0.182174	0.202977		1549	0.168824	0.231362	0.254562
1550	0.207613	0.181701	0.20251		1550	0.168165	0.230831	0.253731
1551	0.20704	0.182523	0.201921		1551	0.168018	0.230411	0.254321
1552	0.205064	0.183149	0.200887		1552	0.167715	0.23065	0.253152
1553	0.201199	0.182452	0.198749		1553	0.168231	0.230565	0.253722
1554	0.201594	0.181797	0.198723		1554	0.167821	0.227865	0.251986
1555	0.201659	0.180892	0.200981		1555	0.167066	0.227551	0.251919
1556	0.200296	0.181027	0.20187		1556	0.167161	0.227931	0.250748
1557	0.200347	0.178799	0.202619		1557	0.166088	0.228837	0.24945
1558	0.202269	0.179383	0.20371		1558	0.164648	0.230511	0.248476
1559	0.201016	0.179463	0.205275		1559	0.164766	0.234616	0.246145
1560	0.200775	0.179265	0.201893		1560	0.165602	0.237085	0.24542
1561	0.199964	0.17825	0.2022		1561	0.166038	0.238621	0.246005
1562	0.200388	0.177543	0.201091		1562	0.167195	0.238938	0.24563
1563	0.201489	0.177369	0.200808		1563	0.167141	0.239395	0.242163
1564	0.201833	0.176343	0.200285		1564	0.166689	0.24168	0.242246
1565	0.203883	0.177253	0.201514		1565	0.166356	0.241701	0.241861
1566	0.206069	0.177722	0.19984		1566	0.165382	0.243835	0.24214
1567	0.206634	0.178973	0.199949		1567	0.165744	0.245522	0.241769
1568	0.205989	0.17874	0.199716		1568	0.166136	0.2462	0.243066
1569	0.205482	0.180057	0.199479		1569	0.166117	0.243244	0.243732
1570	0.20325	0.178331	0.198609		1570	0.166355	0.244452	0.243116
1571	0.201748	0.17796	0.199293		1571	0.167093	0.244514	0.242864
1572	0.200356	0.178224	0.198048		1572	0.167736	0.244103	0.24169
1573	0.199523	0.177855	0.199294		1573	0.168011	0.244735	0.242166
1574	0.2001	0.176732	0.19899		1574	0.167718	0.248387	0.243526
1575	0.199416	0.178749	0.199927		1575	0.167511	0.248268	0.243874
1576	0.198214	0.179335	0.198923		1576	0.166657	0.247572	0.242104
1577	0.197148	0.177778	0.200094		1577	0.165854	0.248601	0.242179
1578	0.196766	0.177918	0.198941		1578	0.165401	0.248787	0.240384
1579	0.196174	0.177547	0.198117		1579	0.166672	0.247675	0.23917
1580	0.196859	0.177362	0.198151		1580	0.16737	0.248208	0.239545
1581	0.197114	0.177014	0.198674		1581	0.167732	0.247494	0.240198
1582	0.198937	0.179749	0.199148		1582	0.167181	0.246143	0.242064
1583	0.197482	0.180252	0.197979		1583	0.167645	0.244643	0.244173
1584	0.197246	0.18164	0.199376		1584	0.16682	0.242299	0.244435
1585	0.195622	0.181285	0.200016		1585	0.166331	0.241278	0.244781
1586	0.193964	0.180768	0.201361		1586	0.16674	0.240728	0.245329
1587	0.192434	0.177288	0.200559		1587	0.167628	0.240116	0.244983
1588	0.192883	0.177522	0.202667		1588	0.16845	0.23975	0.24593
1589	0.192145	0.176368	0.201982		1589	0.168418	0.238416	0.247412
1590	0.192858	0.175997	0.201656		1590	0.168256	0.236638	0.248743
1591	0.194636	0.176625	0.201024		1591	0.167662	0.235678	0.250792
1592	0.195412	0.178547	0.20133		1592	0.167965	0.233691	0.250329
1593	0.195952	0.177058	0.199227		1593	0.166903	0.233361	0.250307
1594	0.19851	0.176939	0.199835		1594	0.165874	0.233841	0.250928
1595	0.198633	0.176587	0.199339		1595	0.166081	0.233102	0.25096
1596	0.198042	0.175859	0.199131		1596	0.165931	0.232734	0.250339
1597	0.197454	0.174282	0.199082		1597	0.164541	0.23289	0.25218
1598	0.198216	0.174967	0.199991		1598	0.164757	0.232772	0.252004
1599	0.198329	0.175219	0.197933		1599	0.165448	0.231983	0.250568
1600	0.199018	0.176007	0.198868		1600	0.164552	0.231326	0.251529
1601	0.199965	0.175103	0.198344		1601	0.16448	0.23014	0.252277
1602	0.201131	0.176169	0.19893		1602	0.1666	0.22869	0.254374
1603	0.201133	0.17708	0.197903		1603	0.166578	0.228377	0.255577
1604	0.199221	0.17754	0.198983		1604	0.166803	0.228965	0.257725
1605	0.198301	0.176079	0.198783		1605	0.167504	0.229464	0.257069
1606	0.197568	0.176987	0.198303		1606	0.167703	0.228942	0.256682
1607	0.197559	0.177339	0.197067		1607	0.167201	0.22908	0.251937
1608	0.196929	0.174575	0.197819		1608	0.167189	0.227558	0.248807
1609	0.197214	0.172635	0.197787		1609	0.168045	0.225661	0.245921
1610	0.199241	0.172614	0.197613		1610	0.167889	0.225337	0.243558
1611	0.198923	0.171712	0.198777		1611	0.167717	0.225257	0.242847
1612	0.197887	0.170926	0.199214		1612	0.166252	0.226251	0.241293
1613	0.198223	0.172034	0.198673		1613	0.165261	0.225851	0.24356
1614	0.197237	0.172762	0.200013		1614	0.163958	0.227679	0.244056
1615	0.196022	0.172577	0.198891		1615	0.1634	0.228793	0.243905
1616	0.196887	0.172075	0.196899		1616	0.164092	0.229898	0.243003
1617	0.196983	0.173259	0.196296		1617	0.164412	0.231909	0.246749
1618	0.1973	0.173884	0.197673		1618	0.165287	0.23388	0.246768
1619	0.19691	0.173563	0.19539		1619	0.165955	0.234345	0.246667
1620	0.196303	0.175005	0.197305		1620	0.167093	0.234766	0.2475
1621	0.195606	0.17451	0.199618		1621	0.167308	0.233134	0.247672
1622	0.194574	0.173778	0.200033		1622	0.16643	0.233247	0.245811
1623	0.192645	0.172708	0.199987		1623	0.165848	0.232609	0.243512
1624	0.194477	0.173289	0.202043		1624	0.164822	0.231679	0.241982
1625	0.19462	0.171288	0.201894		1625	0.164835	0.229267	0.241729
1626	0.196126	0.173619	0.200744		1626	0.164817	0.230864	0.239963
1627	0.199686	0.172882	0.201727		1627	0.166093	0.229419	0.240313
1628	0.200082	0.174443	0.202435		1628	0.165989	0.229279	0.241209
1629	0.19924	0.17397	0.202394		1629	0.167024	0.228418	0.241954
1630	0.198288	0.174367	0.202524		1630	0.166903	0.22809	0.241642
1631	0.197512	0.172652	0.203253		1631	0.166439	0.22773	0.243296
1632	0.195691	0.172408	0.204295		1632	0.166643	0.227629	0.243603
1633	0.197413	0.172267	0.204078		1633	0.16794	0.227548	0.244012
1634	0.197848	0.17278	0.204507		1634	0.168454	0.228955	0.245962
1635	0.198343	0.173459	0.204572		1635	0.168597	0.231205	0.246224
1636	0.197042	0.173891	0.205037		1636	0.16959	0.230136	0.245827
1637	0.197676	0.176356	0.205381		1637	0.169476	0.23021	0.245916
1638	0.196892	0.174712	0.204011		1638	0.169183	0.229541	0.247668
1639	0.197327	0.1759	0.202772		1639	0.168616	0.228196	0.248398
1640	0.197465	0.175663	0.202248		1640	0.169682	0.226921	0.250009
1641	0.19979	0.176708	0.201538		1641	0.168865	0.226042	0.248365
1642	0.198261	0.175611	0.199918		1642	0.169179	0.224682	0.246632
1643	0.196496	0.175411	0.199767		1643	0.169633	0.223796	0.244304
1644	0.196983	0.174951	0.199728		1644	0.169285	0.223265	0.241553
1645	0.19758	0.175831	0.19889		1645	0.168316	0.222568	0.238639
1646	0.19557	0.175986	0.197457		1646	0.168381	0.223821	0.239646
1647	0.195352	0.175961	0.196862		1647	0.167365	0.223257	0.23956
1648	0.197064	0.177919	0.196485		1648	0.16594	0.223158	0.2412
1649	0.194633	0.177796	0.197195		1649	0.166473	0.223364	0.242057
1650	0.193547	0.178075	0.197603		1650	0.166029	0.222851	0.244401
1651	0.194702	0.178274	0.199262		1651	0.165345	0.223413	0.247081
1652	0.195029	0.178622	0.199322		1652	0.16529	0.223278	0.249068
1653	0.194072	0.177599	0.200348		1653	0.166162	0.224561	0.246473
1654	0.195844	0.177737	0.200124		1654	0.165362	0.224539	0.245206
1655	0.196437	0.176592	0.199987		1655	0.164954	0.225491	0.241374
1656	0.19591	0.175594	0.198986		1656	0.164833	0.224626	0.238956
1657	0.196206	0.173959	0.19879		1657	0.165031	0.225728	0.238286
1658	0.195602	0.174376	0.197775		1658	0.163735	0.225076	0.237012
1659	0.194406	0.171827	0.196519		1659	0.16448	0.224336	0.23582
1660	0.195233	0.172444	0.194711		1660	0.164187	0.223691	0.237229
1661	0.195597	0.173323	0.19391		1661	0.165857	0.224321	0.234273
1662	0.19505	0.173642	0.194548		1662	0.166028	0.224219	0.233666
1663	0.196002	0.174222	0.195253		1663	0.166413	0.22279	0.233968
1664	0.196511	0.175589	0.196765		1664	0.166538	0.222889	0.232969
1665	0.195123	0.175379	0.197739		1665	0.166819	0.223072	0.230422
1666	0.195782	0.173661	0.19929		1666	0.164472	0.221648	0.23205
1667	0.195751	0.175489	0.198995		1667	0.164165	0.221146	0.230795
1668	0.195904	0.174108	0.200229		1668	0.164213	0.223424	0.230663
1669	0.1959	0.174389	0.198859		1669	0.163438	0.224882	0.231969
1670	0.197813	0.175446	0.199821		1670	0.163372	0.225358	0.232359
1671	0.195862	0.176715	0.199741		1671	0.164654	0.226053	0.230407
1672	0.196167	0.17553	0.198581		1672	0.1647	0.227359	0.227676
1673	0.196938	0.177075	0.198453		1673	0.165406	0.226043	0.225559
1674	0.198042	0.178246	0.198224		1674	0.164281	0.226398	0.222709
1675	0.196239	0.1772	0.196927		1675	0.164479	0.227665	0.222504
1676	0.196874	0.177513	0.195477		1676	0.164722	0.227797	0.223636
1677	0.198081	0.177076	0.195913		1677	0.164662	0.229177	0.222639
1678	0.198536	0.175091	0.19395		1678	0.164786	0.232028	0.222197
1679	0.19812	0.173806	0.19352		1679	0.165677	0.231517	0.220668
1680	0.19881	0.174327	0.193986		1680	0.16531	0.232588	0.218331
1681	0.199261	0.175933	0.197358		1681	0.164879	0.235611	0.214524
1682	0.198501	0.17674	0.197988		1682	0.164828	0.23574	0.215476
1683	0.198139	0.178209	0.197506		1683	0.164255	0.235095	0.213846
1684	0.196792	0.178395	0.199109		1684	0.16437	0.236444	0.213537
1685	0.196557	0.177179	0.198816		1685	0.165118	0.237209	0.213648
1686	0.196224	0.174704	0.196451		1686	0.164846	0.236136	0.21327
1687	0.19425	0.173081	0.196997		1687	0.165311	0.236171	0.214222
1688	0.193327	0.172807	0.199012		1688	0.16546	0.237025	0.21631
1689	0.19377	0.172731	0.19796		1689	0.166292	0.236392	0.217332
1690	0.192286	0.172472	0.199311		1690	0.166797	0.235737	0.21627
1691	0.191524	0.173589	0.199233		1691	0.166206	0.236492	0.218865
1692	0.192236	0.174392	0.199248		1692	0.166148	0.236877	0.217612
1693	0.19069	0.175644	0.199102		1693	0.166007	0.237269	0.216579
1694	0.190234	0.176176	0.199166		1694	0.165098	0.238808	0.216564
1695	0.189346	0.178334	0.19621		1695	0.164078	0.238518	0.217546
1696	0.189116	0.177339	0.195101		1696	0.16475	0.23983	0.216391
1697	0.188263	0.177328	0.193929		1697	0.164119	0.239567	0.214158
1698	0.1882	0.174948	0.192696		1698	0.164623	0.238415	0.21293
1699	0.187935	0.175729	0.190723		1699	0.165244	0.238387	0.212287
1700	0.189296	0.174116	0.192736		1700	0.164435	0.238483	0.210888
1701	0.188177	0.174067	0.19358		1701	0.1636	0.236968	0.210196
1702	0.187704	0.173615	0.195056		1702	0.163519	0.236812	0.211336
1703	0.188935	0.17521	0.195173		1703	0.162923	0.239063	0.211557
1704	0.188907	0.17366	0.197461		1704	0.163132	0.238601	0.21034
1705	0.188046	0.173802	0.197181		1705	0.16416	0.237706	0.2117
1706	0.188201	0.173843	0.196112		1706	0.164912	0.237553	0.210588
1707	0.188158	0.173779	0.196096		1707	0.164678	0.236319	0.20989
1708	0.187021	0.172251	0.196321		1708	0.164361	0.234787	0.209877
1709	0.187592	0.173753	0.197088		1709	0.164313	0.235137	0.209638
1710	0.188341	0.174991	0.197819		1710	0.163307	0.234343	0.209982
1711	0.189423	0.176797	0.199106		1711	0.164163	0.234791	0.210707
1712	0.191389	0.179003	0.198187		1712	0.164544	0.232938	0.209537
1713	0.191964	0.179079	0.197121		1713	0.164703	0.230383	0.210051
1714	0.191215	0.176907	0.198251		1714	0.164597	0.229284	0.20974
1715	0.192456	0.175591	0.197967		1715	0.165983	0.229979	0.210233
1716	0.192347	0.173687	0.198132		1716	0.165432	0.227251	0.209819
1717	0.190176	0.171754	0.19965		1717	0.165777	0.22958	0.20942
1718	0.19078	0.173617	0.201461		1718	0.166432	0.230758	0.208991
1719	0.192212	0.174619	0.201022		1719	0.165006	0.229365	0.209207
1720	0.190124	0.175245	0.199356		1720	0.164095	0.227191	0.205998
1721	0.192071	0.174853	0.198614		1721	0.164107	0.228401	0.204767
1722	0.194698	0.174877	0.197707		1722	0.164438	0.226803	0.204649
1723	0.194283	0.173522	0.198569		1723	0.163634	0.225577	0.202277
1724	0.19296	0.174972	0.19866		1724	0.164573	0.225895	0.20169
1725	0.193569	0.175572	0.199958		1725	0.165439	0.227772	0.20246
1726	0.190378	0.177141	0.199879		1726	0.165153	0.227444	0.203055
1727	0.189484	0.176321	0.20095		1727	0.165943	0.228427	0.204549
1728	0.188451	0.177874	0.200249		1728	0.166804	0.229052	0.204583
1729	0.187163	0.175949	0.199342		1729	0.167153	0.230264	0.205462
1730	0.186069	0.176713	0.20068		1730	0.167322	0.231909	0.206679
1731	0.185685	0.177405	0.203545		1731	0.166364	0.232145	0.206756
1732	0.184776	0.178526	0.203097		1732	0.164974	0.232201	0.206282
1733	0.184246	0.177538	0.203019		1733	0.165308	0.232283	0.207316
1734	0.185268	0.178323	0.201953		1734	0.16516	0.232444	0.206663
1735	0.185885	0.178355	0.202233		1735	0.164305	0.229943	0.204357
1736	0.185126	0.177299	0.200974		1736	0.165312	0.230964	0.20332
1737	0.186124	0.177917	0.200853		1737	0.165897	0.231669	0.203962
1738	0.188661	0.178496	0.200333		1738	0.165766	0.230768	0.203635
1739	0.189743	0.179411	0.201965		1739	0.165556	0.229733	0.204043
1740	0.189728	0.178751	0.200962		1740	0.165992	0.230487	0.20543
1741	0.191776	0.179118	0.201833		1741	0.16651	0.228363	0.207492
1742	0.191315	0.178445	0.201698		1742	0.165788	0.226168	0.206498
1743	0.190556	0.178732	0.202359		1743	0.165477	0.228075	0.206498
1744	0.190924	0.177378	0.202587		1744	0.166144	0.229097	0.207725
1745	0.192274	0.176343	0.20324		1745	0.165361	0.22989	0.208834
1746	0.19244	0.175167	0.201936		1746	0.164912	0.230771	0.207775
1747	0.19233	0.176335	0.200812		1747	0.164834	0.231769	0.207898
1748	0.191817	0.176393	0.198991		1748	0.16506	0.230417	0.207801
1749	0.191276	0.176406	0.197318		1749	0.164017	0.230431	0.204794
1750	0.191168	0.177478	0.195924		1750	0.16421	0.228703	0.204142
1751	0.191265	0.178622	0.194993		1751	0.163617	0.227633	0.20475
1752	0.190689	0.17683	0.195192		1752	0.163897	0.226464	0.205127
1753	0.191902	0.176886	0.196147		1753	0.164028	0.226322	0.205676
1754	0.189967	0.177055	0.195145		1754	0.164713	0.225404	0.206748
1755	0.190246	0.175074	0.195689		1755	0.16522	0.225176	0.206457
1756	0.190609	0.175105	0.19538		1756	0.165935	0.22659	0.204924
1757	0.191086	0.177418	0.195541		1757	0.166169	0.22776	0.204109
1758	0.190688	0.176999	0.196188		1758	0.165372	0.228081	0.205052
1759	0.193833	0.177101	0.197454		1759	0.165477	0.227341	0.205713
1760	0.195013	0.178449	0.19846		1760	0.166036	0.226808	0.20612
1761	0.193899	0.179468	0.199125		1761	0.165606	0.22534	0.20663
1762	0.194575	0.178492	0.199838		1762	0.165703	0.224858	0.208364
1763	0.194496	0.178883	0.199756		1763	0.165203	0.224865	0.20738
1764	0.193345	0.179905	0.20007		1764	0.164741	0.223823	0.209713
1765	0.192557	0.179806	0.198308		1765	0.163858	0.224943	0.209725
1766	0.194567	0.179575	0.199005		1766	0.164061	0.22465	0.21054
1767	0.195056	0.179927	0.198843		1767	0.163126	0.225845	0.209492
1768	0.194223	0.180156	0.198985		1768	0.163714	0.225243	0.208659
1769	0.193853	0.179982	0.199374		1769	0.164987	0.226331	0.206652
1770	0.193643	0.181306	0.200063		1770	0.165243	0.226736	0.205654
1771	0.191933	0.181435	0.20084		1771	0.165275	0.228848	0.204513
1772	0.191732	0.181825	0.199897		1772	0.165727	0.22934	0.204252
1773	0.193664	0.181648	0.199438		1773	0.166227	0.229727	0.204934
1774	0.19376	0.182299	0.198986		1774	0.165893	0.230783	0.204997
1775	0.193177	0.181622	0.199278		1775	0.165814	0.231082	0.205623
1776	0.192719	0.181568	0.198019		1776	0.165738	0.229614	0.20517
1777	0.191142	0.179932	0.199624		1777	0.166995	0.228932	0.206506
1778	0.189995	0.179588	0.199239		1778	0.16592	0.229132	0.206915
1779	0.188886	0.179112	0.198759		1779	0.165463	0.229077	0.205029
1780	0.189355	0.179274	0.201457		1780	0.165328	0.228521	0.20342
1781	0.192051	0.178388	0.201672		1781	0.166058	0.230266	0.204968
1782	0.193664	0.180181	0.200929		1782	0.165798	0.23039	0.203238
1783	0.193132	0.181085	0.20109		1783	0.166646	0.230495	0.202084
1784	0.193466	0.180786	0.201843		1784	0.166578	0.230505	0.202664
1785	0.193002	0.179397	0.198738		1785	0.16643	0.231028	0.203958
1786	0.191998	0.178652	0.199205		1786	0.166022	0.231894	0.201829
1787	0.192278	0.176041	0.198246		1787	0.165377	0.233225	0.202255
1788	0.192799	0.174751	0.19914		1788	0.164209	0.235057	0.203251
1789	0.193488	0.173711	0.198563		1789	0.163819	0.237152	0.206077
1790	0.192704	0.17236	0.198729		1790	0.164126	0.237232	0.205234
1791	0.193045	0.172167	0.199304		1791	0.164031	0.236183	0.206671
1792	0.192771	0.173491	0.198246		1792	0.164217	0.235013	0.205548
1793	0.192572	0.172959	0.198317		1793	0.165753	0.235559	0.204911
1794	0.191582	0.174296	0.198999		1794	0.16624	0.235568	0.202015
1795	0.192291	0.176114	0.198746		1795	0.167118	0.235618	0.203299
1796	0.192213	0.17583	0.196715		1796	0.167693	0.234604	0.202997
1797	0.191086	0.176948	0.197439		1797	0.16788	0.232931	0.203344
1798	0.192029	0.17868	0.195902		1798	0.16789	0.232139	0.205213
1799	0.193001	0.177768	0.194241		1799	0.167543	0.229343	0.207727
1800	0.193564	0.176855	0.193729		1800	0.167152	0.230083	0.207788

## Sheet: graph
Figure 3-figure supplement 1
Vehicle						300 nM CNP
Fluctuation-positive cells (%)			Fluctuation amplitude (ΔF340/F380)			Fluctuation-positive cells (%)			Fluctuation amplitude (ΔF340/F380)
Basal	+U73122		Basal	+U73122		Basal	+U73122		Basal	+U73122
40	10		0.052473	0.01252		86.6667	66.6667		0.0916983	0.0535996
30	13.3333		0.0369485	0.01784		80	50		0.0657185	0.0370385
30	23.3333		0.0397532	0.0241339		80	53.3333		0.0619891	0.043944
						76.6667	60		0.07087	0.0427739
						80	60		0.0659631	0.0396161
