# Supplementary material for: C-type natriuretic peptide facilitates autonomic Ca2+ entry in growth plate chondrocytes for stimulating bone growth
Source: eLife. 2022 Mar 15;11:e71931. doi: 10.7554/eLife.71931 (PMC8923661; doi:10.7554/eLife.71931)
Supplement: Figure 3—figure supplement 2—source data 1. [file elife-71931-fig3-figsupp2-data1.xlsx]

## Sheet: trace
Figure 3-figure supplement 2A
LPA (10 mM)
Vehicle					CNP (300 nM)
Times (s)	Cell1	Cell2	Cell3		Times (s)	Cell1	Cell2	Cell3
0	0.187136	0.144882	0.191779		0	0.21998	0.201266	0.209663
1	0.188581	0.146136	0.191307		1	0.220811	0.199853	0.205395
2	0.190202	0.146644	0.188043		2	0.223276	0.200026	0.204401
3	0.190564	0.147398	0.188425		3	0.226624	0.199685	0.202575
4	0.192345	0.148538	0.186071		4	0.231082	0.198353	0.199812
5	0.187473	0.145767	0.18673		5	0.23642	0.200063	0.201
6	0.18711	0.145907	0.183505		6	0.239559	0.200717	0.202025
7	0.182549	0.145243	0.183883		7	0.242161	0.200231	0.201085
8	0.179583	0.14677	0.183128		8	0.245435	0.199722	0.198548
9	0.180529	0.142051	0.184934		9	0.246186	0.198902	0.196425
10	0.183937	0.143969	0.1836		10	0.245338	0.196817	0.192461
11	0.180781	0.142903	0.186708		11	0.24653	0.194544	0.191833
12	0.182018	0.14301	0.187476		12	0.246317	0.192659	0.190661
13	0.180636	0.141391	0.186679		13	0.241671	0.193116	0.189737
14	0.176417	0.14265	0.185386		14	0.241126	0.195355	0.189704
15	0.174687	0.145587	0.180971		15	0.238813	0.195061	0.188376
16	0.173229	0.147143	0.180164		16	0.236514	0.196414	0.187201
17	0.172684	0.149869	0.180625		17	0.231542	0.19798	0.189104
18	0.172928	0.150321	0.182785		18	0.23249	0.197446	0.189723
19	0.177193	0.153601	0.183048		19	0.22873	0.197272	0.191874
20	0.176571	0.150335	0.186066		20	0.227433	0.196726	0.190384
21	0.178837	0.148572	0.186932		21	0.225141	0.198245	0.191131
22	0.179905	0.145153	0.186854		22	0.224	0.200928	0.188968
23	0.183085	0.147297	0.185796		23	0.222206	0.203246	0.189377
24	0.182204	0.146219	0.186248		24	0.220369	0.203604	0.188292
25	0.185238	0.149652	0.18815		25	0.220195	0.207484	0.191447
26	0.183632	0.149197	0.187384		26	0.219208	0.208868	0.189257
27	0.186292	0.149926	0.189235		27	0.220156	0.209724	0.188509
28	0.189883	0.145489	0.19087		28	0.216963	0.209102	0.186987
29	0.190207	0.147514	0.191043		29	0.217937	0.209483	0.186423
30	0.192261	0.148781	0.188042		30	0.214649	0.208384	0.183055
31	0.194474	0.150792	0.188073		31	0.212395	0.20771	0.18431
32	0.189732	0.150055	0.187437		32	0.209199	0.20531	0.185482
33	0.186646	0.154941	0.18567		33	0.208211	0.20583	0.187771
34	0.184903	0.152418	0.184847		34	0.204718	0.205026	0.186541
35	0.184299	0.149476	0.184894		35	0.20353	0.202712	0.187081
36	0.185762	0.145305	0.184802		36	0.202081	0.204247	0.185999
37	0.189149	0.144185	0.183991		37	0.202066	0.204862	0.186675
38	0.188386	0.139519	0.184749		38	0.19986	0.201924	0.185762
39	0.186423	0.141747	0.184647		39	0.198707	0.201293	0.184609
40	0.185068	0.142508	0.185257		40	0.197583	0.200865	0.185645
41	0.185485	0.144655	0.185729		41	0.19528	0.196509	0.185638
42	0.185924	0.147288	0.186375		42	0.19315	0.195018	0.184139
43	0.188237	0.14779	0.184898		43	0.191873	0.197986	0.185235
44	0.191899	0.143772	0.185383		44	0.19242	0.197471	0.188282
45	0.194445	0.14021	0.184183		45	0.191369	0.19822	0.189795
46	0.198294	0.140382	0.182976		46	0.191331	0.198885	0.188163
47	0.202945	0.137267	0.183373		47	0.189657	0.196153	0.186206
48	0.204348	0.135775	0.183544		48	0.188726	0.194508	0.186233
49	0.205294	0.136787	0.182227		49	0.186595	0.193713	0.183702
50	0.203926	0.142046	0.183695		50	0.187631	0.193173	0.184562
51	0.202183	0.144462	0.18338		51	0.189908	0.193677	0.18815
52	0.1965	0.147838	0.182659		52	0.192554	0.196129	0.191993
53	0.193791	0.150649	0.182732		53	0.195596	0.196316	0.191281
54	0.191931	0.151972	0.18381		54	0.198009	0.19806	0.195103
55	0.193218	0.151333	0.181822		55	0.198427	0.197298	0.195321
56	0.194176	0.151926	0.181661		56	0.197077	0.195856	0.196353
57	0.199027	0.148943	0.182035		57	0.19611	0.19622	0.198338
58	0.199652	0.14747	0.181774		58	0.195852	0.194392	0.201159
59	0.205301	0.146343	0.181096		59	0.194241	0.19435	0.204295
60	0.207112	0.146672	0.182282		60	0.194264	0.198656	0.206242
61	0.209949	0.143835	0.182219		61	0.195185	0.201904	0.205811
62	0.207628	0.145761	0.178586		62	0.195197	0.205224	0.203832
63	0.211623	0.148242	0.175844		63	0.195359	0.210932	0.203188
64	0.207992	0.150413	0.17418		64	0.195712	0.211763	0.201941
65	0.204048	0.148758	0.17478		65	0.193862	0.212788	0.202216
66	0.198995	0.150106	0.174427		66	0.192122	0.215825	0.202906
67	0.196401	0.14914	0.176227		67	0.196674	0.214543	0.202071
68	0.191819	0.146324	0.17845		68	0.199812	0.213032	0.202779
69	0.190546	0.143563	0.181116		69	0.204661	0.212575	0.202862
70	0.188149	0.145769	0.18062		70	0.213783	0.208432	0.202217
71	0.183694	0.147896	0.182477		71	0.223466	0.205246	0.201981
72	0.183958	0.149324	0.182283		72	0.22939	0.205731	0.206436
73	0.182933	0.152703	0.183609		73	0.234782	0.204816	0.205293
74	0.184498	0.154977	0.185123		74	0.240607	0.207728	0.20459
75	0.184959	0.15318	0.185963		75	0.243837	0.207807	0.205658
76	0.188003	0.150378	0.186057		76	0.247328	0.207646	0.205932
77	0.187921	0.149003	0.188543		77	0.249823	0.209293	0.203563
78	0.190167	0.145035	0.189032		78	0.253761	0.208642	0.203118
79	0.189368	0.142481	0.186848		79	0.256116	0.205663	0.204393
80	0.193624	0.142141	0.188371		80	0.260336	0.206823	0.204278
81	0.195425	0.144314	0.18875		81	0.262158	0.207796	0.20476
82	0.196471	0.146059	0.186796		82	0.263556	0.204342	0.206528
83	0.197926	0.145944	0.184984		83	0.263897	0.203524	0.207045
84	0.198409	0.147303	0.186362		84	0.264513	0.200776	0.205185
85	0.199753	0.145489	0.185359		85	0.262636	0.199292	0.206481
86	0.200767	0.142361	0.183968		86	0.262219	0.1978	0.205227
87	0.207655	0.142516	0.186869		87	0.258421	0.196299	0.202856
88	0.20848	0.144546	0.188586		88	0.256348	0.194988	0.202516
89	0.213731	0.140333	0.187497		89	0.253751	0.19693	0.204019
90	0.215334	0.142204	0.189853		90	0.252226	0.199621	0.20095
91	0.217904	0.141129	0.189154		91	0.253702	0.201093	0.201268
92	0.215456	0.140144	0.188917		92	0.258071	0.202488	0.200845
93	0.215073	0.141468	0.189709		93	0.262362	0.202861	0.200795
94	0.212795	0.146408	0.190891		94	0.266315	0.204108	0.196677
95	0.208042	0.146344	0.18776		95	0.27179	0.200521	0.196629
96	0.205436	0.149451	0.193155		96	0.269907	0.196855	0.194507
97	0.201922	0.152322	0.191363		97	0.266643	0.196012	0.193517
98	0.200766	0.151862	0.192592		98	0.262678	0.19712	0.191623
99	0.198342	0.151605	0.193083		99	0.260314	0.195872	0.191326
100	0.198372	0.148658	0.193194		100	0.255201	0.199429	0.189383
101	0.194496	0.146328	0.190959		101	0.25375	0.202191	0.190598
102	0.192221	0.143805	0.192065		102	0.253701	0.204585	0.19006
103	0.191931	0.143454	0.19028		103	0.25336	0.208998	0.190084
104	0.189291	0.144047	0.189289		104	0.251214	0.209741	0.192514
105	0.185409	0.148673	0.19115		105	0.248426	0.210296	0.192128
106	0.184001	0.150299	0.189387		106	0.246002	0.213033	0.193939
107	0.182917	0.148739	0.188746		107	0.24622	0.214874	0.194965
108	0.177023	0.148161	0.190443		108	0.244575	0.215584	0.195436
109	0.176113	0.146681	0.189834		109	0.245737	0.222806	0.193305
110	0.174791	0.147279	0.190085		110	0.24692	0.22543	0.193213
111	0.173047	0.148011	0.190267		111	0.251037	0.226185	0.189265
112	0.173291	0.151333	0.191909		112	0.252239	0.227827	0.185147
113	0.176265	0.15061	0.188147		113	0.257381	0.227171	0.183833
114	0.174963	0.149417	0.188406		114	0.256857	0.225848	0.184773
115	0.174945	0.146046	0.186647		115	0.261904	0.227772	0.183326
116	0.1777	0.144435	0.18751		116	0.263703	0.229576	0.18169
117	0.180132	0.139784	0.186252		117	0.266385	0.229478	0.184616
118	0.178863	0.141233	0.189335		118	0.264684	0.233236	0.183349
119	0.184019	0.142078	0.190999		119	0.268575	0.234065	0.179504
120	0.186232	0.145611	0.18997		120	0.267736	0.234018	0.178134
121	0.188016	0.148165	0.189579		121	0.265769	0.232139	0.180065
122	0.185714	0.151966	0.189499		122	0.265583	0.232562	0.179139
123	0.189315	0.155283	0.189792		123	0.264888	0.229616	0.179219
124	0.189062	0.155878	0.189818		124	0.263715	0.227228	0.179867
125	0.189897	0.155653	0.191258		125	0.261213	0.22849	0.181172
126	0.187844	0.153123	0.191672		126	0.26153	0.230996	0.178765
127	0.187503	0.151443	0.193241		127	0.25996	0.232264	0.176991
128	0.184924	0.149921	0.192995		128	0.261074	0.235313	0.177664
129	0.18152	0.150268	0.190948		129	0.261074	0.237401	0.176602
130	0.181444	0.146525	0.191996		130	0.263778	0.233361	0.176223
131	0.183062	0.148362	0.192505		131	0.266773	0.23085	0.177009
132	0.182194	0.147121	0.191692		132	0.269951	0.229077	0.174808
133	0.179749	0.144808	0.192197		133	0.274769	0.224437	0.174824
134	0.178347	0.146205	0.193139		134	0.277849	0.223393	0.177948
135	0.177014	0.14695	0.192335		135	0.28038	0.222802	0.17737
136	0.175397	0.146708	0.193639		136	0.279779	0.220638	0.178065
137	0.174438	0.146313	0.194289		137	0.278606	0.217599	0.181229
138	0.17646	0.145264	0.192969		138	0.277764	0.21632	0.181559
139	0.175075	0.144876	0.195608		139	0.278027	0.212836	0.180232
140	0.174993	0.147215	0.19803		140	0.277241	0.212822	0.181394
141	0.170594	0.148689	0.199266		141	0.280825	0.21121	0.181987
142	0.17243	0.150048	0.20094		142	0.281929	0.211311	0.182789
143	0.170899	0.151986	0.203058		143	0.284014	0.207916	0.184642
144	0.175075	0.151	0.201066		144	0.286911	0.204996	0.183332
145	0.178085	0.148392	0.202585		145	0.287437	0.202256	0.183066
146	0.179896	0.145547	0.201544		146	0.283578	0.202217	0.184632
147	0.183992	0.144371	0.201608		147	0.27997	0.200596	0.187652
148	0.188727	0.141622	0.20103		148	0.273123	0.20146	0.185057
149	0.189094	0.14109	0.203329		149	0.26502	0.201524	0.187317
150	0.190327	0.142912	0.203658		150	0.258543	0.199865	0.189749
151	0.194423	0.143137	0.206363		151	0.255795	0.200327	0.189146
152	0.193757	0.14322	0.206748		152	0.254933	0.20004	0.188359
153	0.194126	0.143652	0.209257		153	0.252432	0.197623	0.189683
154	0.195884	0.143811	0.21149		154	0.249962	0.195837	0.19053
155	0.197793	0.142844	0.209742		155	0.24906	0.196219	0.18891
156	0.195949	0.140701	0.208861		156	0.245128	0.193529	0.188942
157	0.195066	0.142588	0.207402		157	0.239061	0.193005	0.188313
158	0.190946	0.14492	0.20798		158	0.232988	0.194332	0.188034
159	0.189944	0.14444	0.205094		159	0.229264	0.195062	0.18495
160	0.182725	0.144027	0.20819		160	0.223834	0.193776	0.186262
161	0.18259	0.144505	0.205654		161	0.220753	0.192502	0.184754
162	0.180294	0.144204	0.208576		162	0.218233	0.190732	0.183341
163	0.1798	0.145246	0.207132		163	0.217014	0.188851	0.182095
164	0.181247	0.145995	0.20609		164	0.21398	0.186866	0.184101
165	0.183179	0.146521	0.20162		165	0.211334	0.184884	0.179936
166	0.184378	0.150546	0.202478		166	0.208473	0.186373	0.182461
167	0.179799	0.149553	0.200107		167	0.205938	0.186696	0.180801
168	0.181105	0.150978	0.199537		168	0.204735	0.189984	0.181847
169	0.176518	0.152632	0.201911		169	0.202921	0.191957	0.181782
170	0.176584	0.152642	0.203028		170	0.202736	0.193516	0.184459
171	0.176044	0.149986	0.20171		171	0.20072	0.19441	0.181506
172	0.179979	0.150287	0.199635		172	0.204268	0.197322	0.182871
173	0.179909	0.148694	0.197412		173	0.205654	0.198958	0.183564
174	0.182707	0.144286	0.196459		174	0.208186	0.20224	0.18337
175	0.184462	0.146373	0.196512		175	0.208465	0.207609	0.18425
176	0.183221	0.147585	0.196047		176	0.20961	0.211133	0.187513
177	0.184818	0.150035	0.197008		177	0.207904	0.215316	0.188323
178	0.184387	0.148126	0.199565		178	0.206042	0.219679	0.190722
179	0.18188	0.149762	0.199262		179	0.20543	0.222142	0.196092
180	0.177973	0.14596	0.199803		180	0.207906	0.225157	0.19751
181	0.179884	0.145597	0.199683		181	0.209864	0.227278	0.199583
182	0.178522	0.139891	0.200144		182	0.209116	0.22704	0.2035
183	0.179788	0.13915	0.197507		183	0.210278	0.225483	0.205117
184	0.17999	0.139802	0.196855		184	0.208507	0.22677	0.204858
185	0.181543	0.143069	0.193864		185	0.207346	0.226134	0.206501
186	0.179077	0.143262	0.1953		186	0.206542	0.228398	0.208614
187	0.178468	0.148445	0.194797		187	0.209883	0.226097	0.206524
188	0.177209	0.148403	0.197668		188	0.210017	0.224276	0.207399
189	0.176131	0.149916	0.198457		189	0.214024	0.223798	0.208225
190	0.176444	0.147634	0.202749		190	0.215069	0.224287	0.207604
191	0.1789	0.146616	0.202552		191	0.21705	0.222747	0.207244
192	0.177761	0.148277	0.20476		192	0.216052	0.225516	0.209545
193	0.178785	0.146865	0.204206		193	0.219164	0.226416	0.209146
194	0.177775	0.143109	0.203971		194	0.220128	0.228521	0.20753
195	0.175611	0.146622	0.203614		195	0.220352	0.230662	0.211445
196	0.174925	0.144885	0.202822		196	0.221085	0.231739	0.211283
197	0.17649	0.142245	0.20127		197	0.220588	0.23018	0.212489
198	0.174615	0.144403	0.200938		198	0.216067	0.234592	0.212306
199	0.177051	0.14606	0.199263		199	0.210966	0.234059	0.213111
200	0.179318	0.144165	0.196585		200	0.207656	0.233484	0.212736
201	0.182176	0.144242	0.197663		201	0.201748	0.234913	0.214098
202	0.182101	0.144754	0.198806		202	0.198451	0.238565	0.213927
203	0.183191	0.142781	0.199857		203	0.194109	0.237878	0.213204
204	0.183678	0.142374	0.20198		204	0.192319	0.240735	0.213878
205	0.18551	0.141418	0.202651		205	0.19319	0.24054	0.21267
206	0.181595	0.143769	0.203663		206	0.192992	0.244759	0.212899
207	0.18191	0.14355	0.202266		207	0.191956	0.244004	0.213067
208	0.181844	0.146862	0.20194		208	0.19394	0.246862	0.215228
209	0.181268	0.149369	0.203411		209	0.193763	0.243317	0.216158
210	0.179043	0.147761	0.202299		210	0.190632	0.245046	0.217611
211	0.17815	0.145299	0.199986		211	0.190811	0.239411	0.217934
212	0.178008	0.145796	0.19756		212	0.191	0.239132	0.216785
213	0.177925	0.143884	0.194768		213	0.192044	0.235304	0.218776
214	0.178049	0.142689	0.194162		214	0.192238	0.235206	0.216816
215	0.180678	0.142525	0.194808		215	0.193458	0.231702	0.215277
216	0.181017	0.141641	0.194678		216	0.191211	0.229035	0.215619
217	0.182886	0.139498	0.197402		217	0.189631	0.22558	0.217109
218	0.183531	0.13944	0.201335		218	0.188125	0.222452	0.214449
219	0.185059	0.138746	0.198915		219	0.186625	0.22308	0.214763
220	0.183469	0.141915	0.199903		220	0.183418	0.220824	0.214389
221	0.185701	0.145639	0.199936		221	0.18288	0.220942	0.212567
222	0.186745	0.146632	0.198069		222	0.181142	0.223704	0.208509
223	0.187245	0.144939	0.194702		223	0.17773	0.225747	0.206399
224	0.18687	0.146134	0.195357		224	0.175016	0.220042	0.205626
225	0.188564	0.145111	0.196404		225	0.17377	0.220181	0.203371
226	0.190662	0.144884	0.197575		226	0.171851	0.21765	0.202706
227	0.188641	0.145013	0.200582		227	0.170678	0.215707	0.20282
228	0.187253	0.14687	0.202847		228	0.171848	0.212658	0.204044
229	0.185678	0.146972	0.204243		229	0.172377	0.213114	0.204673
230	0.183701	0.149824	0.204539		230	0.171351	0.212444	0.202753
231	0.18269	0.148403	0.205252		231	0.170828	0.214555	0.201785
232	0.183588	0.148627	0.203228		232	0.170601	0.213726	0.200873
233	0.185522	0.150292	0.202809		233	0.170405	0.213667	0.199467
234	0.183357	0.152261	0.201894		234	0.169441	0.212332	0.197279
235	0.186925	0.151971	0.200548		235	0.170662	0.210981	0.200214
236	0.184108	0.152562	0.199354		236	0.170348	0.210894	0.197503
237	0.182266	0.151267	0.199066		237	0.17028	0.208824	0.197613
238	0.17832	0.149314	0.19745		238	0.167806	0.207522	0.197088
239	0.180558	0.146269	0.196358		239	0.168097	0.208252	0.195874
240	0.177577	0.142059	0.197795		240	0.167426	0.208352	0.193714
241	0.17828	0.144258	0.198593		241	0.166812	0.205027	0.194222
242	0.177335	0.145685	0.197038		242	0.166777	0.204922	0.193408
243	0.179837	0.144773	0.197508		243	0.167541	0.206532	0.190469
244	0.17544	0.143578	0.197869		244	0.167462	0.207036	0.190122
245	0.175197	0.145379	0.19718		245	0.165442	0.204168	0.186814
246	0.175247	0.144628	0.197234		246	0.165485	0.202797	0.184116
247	0.174184	0.145953	0.202035		247	0.164322	0.201425	0.183679
248	0.169012	0.147972	0.202725		248	0.164863	0.199007	0.185449
249	0.170942	0.148771	0.202175		249	0.163656	0.195971	0.182886
250	0.169762	0.142867	0.198773		250	0.164548	0.197324	0.186762
251	0.168717	0.140879	0.198028		251	0.163914	0.196368	0.189006
252	0.169623	0.137913	0.195392		252	0.163688	0.195845	0.188487
253	0.171364	0.137914	0.195278		253	0.163164	0.195161	0.188351
254	0.172258	0.138042	0.196979		254	0.164772	0.195331	0.189746
255	0.170803	0.145216	0.198919		255	0.165009	0.194827	0.188194
256	0.169273	0.146545	0.198343		256	0.166994	0.195663	0.186113
257	0.169798	0.148447	0.195744		257	0.1678	0.194938	0.188424
258	0.171497	0.150626	0.19635		258	0.167716	0.194398	0.185903
259	0.170665	0.149629	0.195238		259	0.16697	0.196062	0.184903
260	0.171102	0.150974	0.194988		260	0.166845	0.198748	0.18379
261	0.17366	0.149876	0.19506		261	0.166589	0.19795	0.183756
262	0.172702	0.150636	0.19766		262	0.167163	0.199397	0.179627
263	0.170723	0.146283	0.195802		263	0.167311	0.202798	0.178655
264	0.170627	0.147415	0.194509		264	0.166727	0.204019	0.178964
265	0.170968	0.143817	0.194581		265	0.167903	0.202891	0.176185
266	0.168165	0.143998	0.195339		266	0.16666	0.204922	0.17671
267	0.166355	0.142458	0.193846		267	0.165537	0.205661	0.175624
268	0.166704	0.143804	0.193756		268	0.164567	0.203037	0.175921
269	0.16901	0.146714	0.193859		269	0.164919	0.200667	0.173669
270	0.166143	0.1482	0.19186		270	0.164735	0.199526	0.174782
271	0.165908	0.149516	0.191532		271	0.165082	0.199902	0.173726
272	0.169531	0.152552	0.191903		272	0.165643	0.199504	0.175275
273	0.168908	0.155849	0.192238		273	0.167219	0.200695	0.173991
274	0.166846	0.155105	0.191826		274	0.167023	0.203626	0.171551
275	0.169248	0.155105	0.194611		275	0.166532	0.20319	0.171602
276	0.169624	0.156234	0.195305		276	0.166025	0.203184	0.172339
277	0.168181	0.153991	0.196777		277	0.167351	0.205363	0.17116
278	0.168581	0.15339	0.198435		278	0.165706	0.20697	0.174094
279	0.170029	0.150603	0.199945		279	0.165716	0.208016	0.178045
280	0.170525	0.148565	0.198708		280	0.165005	0.21042	0.177937
281	0.175095	0.148415	0.198437		281	0.165792	0.213141	0.176492
282	0.175755	0.14917	0.196705		282	0.162565	0.213656	0.178709
283	0.176585	0.14785	0.193545		283	0.164772	0.212984	0.177017
284	0.179014	0.148156	0.194378		284	0.164715	0.211863	0.17759
285	0.179281	0.148195	0.194028		285	0.165624	0.211329	0.18165
286	0.173677	0.144815	0.19297		286	0.166012	0.210879	0.18283
287	0.171598	0.141619	0.194867		287	0.166682	0.212209	0.182897
288	0.173187	0.14206	0.197402		288	0.165645	0.213844	0.183529
289	0.168885	0.141581	0.197867		289	0.166383	0.21674	0.183749
290	0.169371	0.141147	0.198069		290	0.167092	0.222528	0.179341
291	0.171091	0.139184	0.19887		291	0.168307	0.226006	0.179608
292	0.171095	0.14191	0.1984		292	0.17138	0.228969	0.180145
293	0.170566	0.141695	0.196965		293	0.17298	0.229511	0.180146
294	0.173152	0.141745	0.194488		294	0.172562	0.233655	0.180222
295	0.173407	0.141878	0.193834		295	0.172355	0.236014	0.181636
296	0.175456	0.145611	0.193125		296	0.17323	0.23622	0.181076
297	0.180126	0.143687	0.194592		297	0.172819	0.237127	0.183035
298	0.184602	0.141822	0.195881		298	0.172388	0.240103	0.18591
299	0.185345	0.143774	0.198291		299	0.173143	0.23999	0.191175
300	0.187965	0.145274	0.199033		300	0.174215	0.241241	0.193585
301	0.189974	0.150059	0.200001		301	0.172178	0.24481	0.196706
302	0.189022	0.1512	0.197135		302	0.171752	0.247761	0.199168
303	0.185528	0.150812	0.197013		303	0.169373	0.251417	0.201284
304	0.188286	0.151428	0.19496		304	0.170447	0.253565	0.20054
305	0.188608	0.149582	0.197847		305	0.1684	0.256125	0.202726
306	0.188009	0.144539	0.197681		306	0.16972	0.255567	0.203918
307	0.189562	0.143183	0.197401		307	0.168915	0.256687	0.203684
308	0.186655	0.144853	0.197251		308	0.171381	0.256979	0.204877
309	0.182789	0.144174	0.196773		309	0.171357	0.259863	0.207968
310	0.180126	0.145456	0.192962		310	0.171816	0.260616	0.207333
311	0.179718	0.145267	0.193548		311	0.171816	0.263581	0.208696
312	0.177418	0.147418	0.194061		312	0.173904	0.262437	0.207758
313	0.179858	0.147066	0.193368		313	0.173696	0.262108	0.206082
314	0.181126	0.146729	0.194017		314	0.172892	0.26229	0.203766
315	0.17927	0.147258	0.195624		315	0.173327	0.261736	0.203649
316	0.177809	0.147485	0.19685		316	0.17128	0.262906	0.204443
317	0.177051	0.149164	0.200154		317	0.17	0.263853	0.20486
318	0.179337	0.149604	0.202956		318	0.170236	0.265167	0.204389
319	0.177903	0.148759	0.20245		319	0.170733	0.265851	0.202489
320	0.177039	0.147002	0.204397		320	0.170887	0.268282	0.204947
321	0.177315	0.147997	0.203181		321	0.172041	0.269433	0.204463
322	0.174631	0.146657	0.200508		322	0.171198	0.272229	0.203853
323	0.174931	0.146379	0.198648		323	0.170756	0.279913	0.20496
324	0.176749	0.14738	0.199313		324	0.169002	0.282279	0.208045
325	0.181733	0.149526	0.195947		325	0.165844	0.285792	0.207899
326	0.183133	0.151267	0.195675		326	0.164107	0.286053	0.206759
327	0.187792	0.150673	0.197371		327	0.165072	0.290838	0.211927
328	0.188063	0.149619	0.198583		328	0.162435	0.28934	0.213934
329	0.189346	0.148348	0.199865		329	0.164683	0.29384	0.211177
330	0.18914	0.147002	0.199294		330	0.169209	0.294737	0.211239
331	0.188708	0.144604	0.200232		331	0.17035	0.302066	0.212927
332	0.188711	0.143624	0.201292		332	0.168169	0.302758	0.208808
333	0.187701	0.144888	0.200281		333	0.169379	0.30451	0.207654
334	0.187161	0.146265	0.198718		334	0.169278	0.303648	0.205676
335	0.1854	0.147151	0.199804		335	0.167434	0.307358	0.202405
336	0.187478	0.14878	0.199458		336	0.169695	0.30791	0.199717
337	0.18686	0.149334	0.197648		337	0.172232	0.311261	0.198275
338	0.187635	0.148079	0.198224		338	0.175901	0.313269	0.196338
339	0.189397	0.147661	0.200671		339	0.176605	0.31821	0.195445
340	0.193901	0.146692	0.202009		340	0.178599	0.315224	0.197357
341	0.196215	0.14505	0.201948		341	0.179562	0.315546	0.195402
342	0.200469	0.145481	0.201513		342	0.180953	0.31519	0.193726
343	0.206199	0.147028	0.200591		343	0.180211	0.317726	0.191517
344	0.209074	0.148959	0.197529		344	0.18073	0.316929	0.190214
345	0.211278	0.148367	0.197546		345	0.181483	0.318436	0.188161
346	0.213648	0.151466	0.195711		346	0.182554	0.319249	0.186568
347	0.213536	0.149564	0.195986		347	0.183975	0.318489	0.184644
348	0.210235	0.149039	0.197699		348	0.187932	0.322658	0.184128
349	0.20681	0.149426	0.199795		349	0.191572	0.319468	0.182629
350	0.204586	0.150617	0.202093		350	0.194309	0.323085	0.182152
351	0.201897	0.148573	0.20209		351	0.195627	0.319732	0.179867
352	0.202116	0.150523	0.203606		352	0.198287	0.316892	0.179529
353	0.202322	0.149931	0.201641		353	0.198996	0.31407	0.178062
354	0.205629	0.14569	0.203668		354	0.200696	0.312782	0.178612
355	0.204859	0.143758	0.20253		355	0.20407	0.311027	0.175426
356	0.204871	0.145368	0.205472		356	0.206467	0.314418	0.175438
357	0.205901	0.146753	0.203551		357	0.207063	0.312694	0.176414
358	0.203791	0.147966	0.203882		358	0.208968	0.306215	0.175503
359	0.199587	0.150238	0.202647		359	0.211018	0.306107	0.176396
360	0.197485	0.156868	0.203325		360	0.211937	0.302624	0.176086
361	0.196586	0.156533	0.200881		361	0.214548	0.300544	0.176098
362	0.192938	0.157133	0.203139		362	0.217892	0.303365	0.174201
363	0.193282	0.159264	0.203872		363	0.220986	0.305732	0.172607
364	0.194399	0.159661	0.20337		364	0.220133	0.307177	0.171898
365	0.199694	0.156571	0.202846		365	0.220594	0.306015	0.172105
366	0.199384	0.156721	0.20535		366	0.221782	0.305764	0.174662
367	0.2	0.158032	0.204673		367	0.221196	0.306152	0.174379
368	0.202533	0.159261	0.206192		368	0.218873	0.302415	0.176854
369	0.201037	0.160136	0.207841		369	0.219447	0.30018	0.17548
370	0.196925	0.163629	0.20687		370	0.222123	0.302657	0.174276
371	0.201103	0.163976	0.204577		371	0.222178	0.299141	0.171521
372	0.20209	0.16196	0.204413		372	0.224732	0.296738	0.172742
373	0.201068	0.162149	0.202889		373	0.226234	0.297568	0.171232
374	0.20244	0.162219	0.2026		374	0.228887	0.297332	0.171429
375	0.204155	0.157779	0.20187		375	0.22665	0.297076	0.171417
376	0.199812	0.153207	0.203789		376	0.225633	0.29563	0.171665
377	0.199093	0.151164	0.20411		377	0.221424	0.294708	0.17035
378	0.196333	0.144006	0.202299		378	0.219446	0.293421	0.169071
379	0.193903	0.142168	0.200505		379	0.218383	0.296249	0.170643
380	0.190404	0.145163	0.200056		380	0.216588	0.292469	0.172476
381	0.188018	0.14831	0.200645		381	0.216787	0.296471	0.17289
382	0.184052	0.151353	0.199448		382	0.217247	0.297324	0.174099
383	0.182848	0.156427	0.199288		383	0.219328	0.299296	0.177288
384	0.180932	0.158159	0.197929		384	0.219353	0.294808	0.176007
385	0.180769	0.157799	0.199195		385	0.219708	0.294715	0.171969
386	0.180374	0.158955	0.19601		386	0.219885	0.291915	0.171566
387	0.183062	0.160262	0.196605		387	0.221671	0.290694	0.170443
388	0.18177	0.15968	0.197913		388	0.224489	0.287744	0.167712
389	0.18732	0.158753	0.200208		389	0.223014	0.289945	0.169758
390	0.189265	0.155101	0.200368		390	0.226529	0.290419	0.173128
391	0.190594	0.149219	0.199865		391	0.229387	0.287934	0.173392
392	0.188951	0.145744	0.197608		392	0.232661	0.289422	0.172154
393	0.192022	0.145915	0.197652		393	0.232119	0.289901	0.171837
394	0.189694	0.145918	0.196848		394	0.237323	0.285811	0.167598
395	0.18756	0.147989	0.195243		395	0.239211	0.284104	0.16628
396	0.187407	0.151492	0.199769		396	0.240343	0.281725	0.16598
397	0.190615	0.152999	0.203207		397	0.24182	0.278146	0.169985
398	0.192223	0.152034	0.202683		398	0.24495	0.277927	0.169868
399	0.192725	0.153119	0.203867		399	0.246867	0.276594	0.170652
400	0.194375	0.151058	0.206766		400	0.247937	0.276058	0.169846
401	0.197914	0.151068	0.207482		401	0.25036	0.276709	0.171539
402	0.19437	0.149129	0.206314		402	0.250554	0.27601	0.167413
403	0.193011	0.148691	0.206976		403	0.25043	0.273632	0.168418
404	0.192142	0.146692	0.206255		404	0.246611	0.272778	0.167796
405	0.191648	0.149268	0.206927		405	0.244369	0.268972	0.169374
406	0.18783	0.151093	0.204129		406	0.238297	0.270339	0.169559
407	0.190284	0.151171	0.204191		407	0.232839	0.268943	0.168908
408	0.192269	0.153655	0.204851		408	0.227262	0.27084	0.170405
409	0.195022	0.152986	0.205109		409	0.226839	0.269772	0.172561
410	0.193823	0.148206	0.201192		410	0.227311	0.271295	0.173119
411	0.192412	0.147542	0.201481		411	0.229323	0.270278	0.172382
412	0.191007	0.148861	0.202149		412	0.232357	0.270782	0.174269
413	0.1881	0.147199	0.201332		413	0.233188	0.267716	0.17356
414	0.185244	0.14897	0.200179		414	0.233357	0.270395	0.174568
415	0.182373	0.152931	0.200535		415	0.233852	0.271388	0.175127
416	0.180419	0.150985	0.201036		416	0.232773	0.268672	0.174978
417	0.178763	0.148685	0.201923		417	0.231904	0.267534	0.173927
418	0.175553	0.14906	0.202146		418	0.232201	0.268067	0.173246
419	0.174646	0.148068	0.202903		419	0.234507	0.266077	0.171248
420	0.175165	0.146439	0.205533		420	0.232338	0.266391	0.170922
421	0.175283	0.147181	0.205591		421	0.2357	0.268772	0.171143
422	0.173972	0.146285	0.2053		422	0.236533	0.268901	0.173539
423	0.17254	0.144355	0.20609		423	0.235858	0.268509	0.173253
424	0.169608	0.143107	0.207228		424	0.232981	0.270226	0.172377
425	0.169335	0.14274	0.206273		425	0.232637	0.269403	0.171183
426	0.168235	0.143435	0.207322		426	0.229207	0.267484	0.171025
427	0.16676	0.14476	0.206953		427	0.226837	0.267622	0.168902
428	0.167637	0.145172	0.207642		428	0.228998	0.263083	0.170675
429	0.169897	0.146872	0.206277		429	0.2278	0.261309	0.171553
430	0.172221	0.147371	0.209122		430	0.225942	0.258772	0.172768
431	0.174423	0.144437	0.206694		431	0.223842	0.260168	0.170879
432	0.176835	0.144346	0.208421		432	0.223191	0.259886	0.174036
433	0.175837	0.141967	0.208983		433	0.221013	0.261181	0.174838
434	0.174399	0.140171	0.209725		434	0.221703	0.258969	0.17524
435	0.171723	0.139944	0.208572		435	0.225061	0.25928	0.17553
436	0.172725	0.143583	0.207676		436	0.230223	0.256691	0.175905
437	0.172321	0.143509	0.207004		437	0.233588	0.254403	0.172826
438	0.172986	0.14776	0.205136		438	0.237398	0.255398	0.170409
439	0.173767	0.147591	0.204356		439	0.239649	0.258282	0.170881
440	0.173104	0.146235	0.2015		440	0.24222	0.258633	0.169615
441	0.170613	0.141718	0.202602		441	0.24096	0.258155	0.172748
442	0.169622	0.143574	0.201843		442	0.240279	0.259722	0.1727
443	0.167639	0.146954	0.201778		443	0.237162	0.262372	0.173987
444	0.166496	0.147268	0.203037		444	0.235911	0.261946	0.175288
445	0.165882	0.145672	0.206542		445	0.230326	0.26411	0.174581
446	0.167446	0.145367	0.209621		446	0.228321	0.267694	0.171183
447	0.168246	0.139365	0.21302		447	0.223549	0.266092	0.173922
448	0.171156	0.133791	0.214124		448	0.220842	0.264372	0.175615
449	0.173189	0.137305	0.214361		449	0.217046	0.262396	0.174446
450	0.174092	0.138362	0.213019		450	0.215146	0.26091	0.173869
451	0.173569	0.139437	0.212034		451	0.210501	0.260781	0.174873
452	0.171136	0.140364	0.209859		452	0.209788	0.263253	0.173947
453	0.173557	0.14155	0.209363		453	0.208878	0.261518	0.171894
454	0.172026	0.137315	0.211242		454	0.207656	0.262907	0.174354
455	0.173297	0.137934	0.209998		455	0.204193	0.258492	0.176751
456	0.170529	0.137922	0.208861		456	0.202579	0.257978	0.177597
457	0.171596	0.142637	0.210211		457	0.200699	0.257943	0.178803
458	0.168792	0.141589	0.21154		458	0.197639	0.259546	0.180544
459	0.170716	0.14267	0.208925		459	0.196172	0.2585	0.1778
460	0.169442	0.14413	0.211631		460	0.194121	0.259423	0.177806
461	0.169631	0.145116	0.212875		461	0.193807	0.253626	0.178393
462	0.172667	0.142798	0.210619		462	0.193331	0.250607	0.17722
463	0.173105	0.141332	0.210887		463	0.19374	0.248556	0.176155
464	0.171639	0.142179	0.210135		464	0.193991	0.243241	0.178497
465	0.175106	0.141461	0.210821		465	0.196744	0.239665	0.177854
466	0.181172	0.141749	0.21026		466	0.198847	0.2394	0.178763
467	0.181903	0.140569	0.209258		467	0.200793	0.234917	0.181318
468	0.184539	0.14184	0.207741		468	0.202704	0.227869	0.182778
469	0.188838	0.140936	0.206837		469	0.203455	0.226988	0.182801
470	0.191499	0.13991	0.206334		470	0.204626	0.22315	0.184992
471	0.191314	0.14273	0.205957		471	0.205692	0.221427	0.186025
472	0.192474	0.144786	0.203656		472	0.208368	0.22048	0.183654
473	0.193054	0.14549	0.204061		473	0.211016	0.219706	0.183398
474	0.193654	0.146575	0.205474		474	0.21296	0.216877	0.184403
475	0.192682	0.149128	0.202481		475	0.216868	0.215125	0.183349
476	0.194701	0.14747	0.202758		476	0.218138	0.21327	0.183237
477	0.197715	0.149337	0.205697		477	0.217593	0.21126	0.184498
478	0.200703	0.14974	0.204072		478	0.216455	0.211934	0.185547
479	0.200422	0.149801	0.204047		479	0.218689	0.209469	0.184885
480	0.20058	0.15078	0.202166		480	0.217233	0.210783	0.185958
481	0.200977	0.151393	0.202812		481	0.217846	0.207785	0.185913
482	0.20044	0.146872	0.201935		482	0.221085	0.207184	0.186546
483	0.197648	0.144242	0.20399		483	0.221324	0.204849	0.184665
484	0.194755	0.142403	0.204823		484	0.219201	0.203158	0.185313
485	0.194024	0.14289	0.211058		485	0.220265	0.202576	0.186183
486	0.1892	0.141301	0.208903		486	0.220765	0.204461	0.18738
487	0.19011	0.143161	0.209034		487	0.220651	0.204328	0.187769
488	0.191128	0.144993	0.206714		488	0.223242	0.20402	0.189091
489	0.189968	0.145381	0.206933		489	0.224421	0.205654	0.190458
490	0.190613	0.142123	0.204665		490	0.222965	0.202999	0.189649
491	0.193003	0.141115	0.206624		491	0.22124	0.201757	0.187954
492	0.188176	0.142659	0.205926		492	0.216911	0.199992	0.187001
493	0.185353	0.140361	0.208096		493	0.215314	0.200037	0.189348
494	0.186916	0.141878	0.207836		494	0.214329	0.200628	0.188619
495	0.184366	0.14224	0.208462		495	0.215894	0.204144	0.188963
496	0.184366	0.139409	0.208311		496	0.216561	0.20317	0.192128
497	0.186405	0.138426	0.208656		497	0.217439	0.206163	0.196962
498	0.185597	0.137572	0.206999		498	0.215427	0.208976	0.199945
499	0.18283	0.136176	0.20415		499	0.212974	0.209438	0.205991
500	0.181755	0.135424	0.20233		500	0.209733	0.209675	0.211842
501	0.178864	0.138042	0.198185		501	0.207965	0.21502	0.215799
502	0.177722	0.136495	0.198235		502	0.205627	0.216022	0.218342
503	0.178111	0.139748	0.200613		503	0.204606	0.216562	0.220321
504	0.1793	0.139291	0.202157		504	0.203518	0.2196	0.218169
505	0.178783	0.139683	0.19851		505	0.201629	0.221229	0.220831
506	0.180826	0.142202	0.201171		506	0.201114	0.220206	0.222329
507	0.182244	0.143506	0.198803		507	0.201574	0.221003	0.226196
508	0.184324	0.144806	0.193085		508	0.199457	0.22349	0.2259
509	0.190669	0.144941	0.192422		509	0.199922	0.226745	0.230224
510	0.196292	0.146329	0.192981		510	0.197249	0.228344	0.226485
511	0.200999	0.146128	0.193837		511	0.195068	0.228872	0.226852
512	0.205072	0.148486	0.193872		512	0.191806	0.229889	0.223098
513	0.208349	0.147093	0.196032		513	0.191457	0.228622	0.222181
514	0.209861	0.149878	0.195709		514	0.189786	0.226605	0.221096
515	0.214022	0.147404	0.197946		515	0.189379	0.228633	0.227006
516	0.212934	0.149808	0.196443		516	0.187347	0.230858	0.224307
517	0.213538	0.149623	0.196539		517	0.188747	0.230499	0.222547
518	0.212018	0.151892	0.196887		518	0.187034	0.233612	0.220153
519	0.208247	0.152368	0.196137		519	0.184185	0.236073	0.218694
520	0.20055	0.153627	0.195298		520	0.182826	0.23635	0.210733
521	0.196125	0.150109	0.194216		521	0.181308	0.236597	0.207738
522	0.189939	0.149673	0.195964		522	0.176475	0.239356	0.207717
523	0.185877	0.145808	0.195502		523	0.174753	0.2401	0.206807
524	0.182295	0.144365	0.195132		524	0.174298	0.23837	0.203341
525	0.182516	0.144972	0.194238		525	0.175244	0.239073	0.202656
526	0.182516	0.146548	0.193677		526	0.1746	0.239297	0.201823
527	0.181179	0.145187	0.193835		527	0.176609	0.239013	0.199202
528	0.182948	0.145414	0.192758		528	0.175643	0.238773	0.197589
529	0.182059	0.145904	0.192739		529	0.175703	0.241212	0.195914
530	0.183904	0.146284	0.19426		530	0.172717	0.242381	0.19532
531	0.181248	0.144951	0.195401		531	0.171055	0.241721	0.194724
532	0.182537	0.145363	0.194451		532	0.169798	0.242444	0.194072
533	0.180894	0.148606	0.19596		533	0.17055	0.243308	0.194588
534	0.182513	0.149537	0.1949		534	0.170421	0.243105	0.19714
535	0.178772	0.149961	0.195038		535	0.171969	0.239754	0.199562
536	0.181522	0.149608	0.195066		536	0.171226	0.243687	0.199948
537	0.179943	0.149983	0.194621		537	0.169815	0.241878	0.199912
538	0.180872	0.146399	0.1951		538	0.167397	0.240093	0.199253
539	0.178336	0.144565	0.19772		539	0.164159	0.239503	0.198467
540	0.179251	0.146407	0.195598		540	0.164334	0.241597	0.197737
541	0.17907	0.146018	0.19387		541	0.166611	0.239358	0.19931
542	0.177485	0.143038	0.196649		542	0.167561	0.240744	0.198305
543	0.177502	0.145406	0.195441		543	0.16974	0.240129	0.200748
544	0.179219	0.146311	0.194443		544	0.171783	0.238974	0.199795
545	0.178306	0.143279	0.194659		545	0.171956	0.238256	0.196292
546	0.178178	0.144204	0.197526		546	0.172007	0.236136	0.191503
547	0.179257	0.146832	0.192858		547	0.173845	0.233826	0.192386
548	0.176104	0.145559	0.193273		548	0.174589	0.233358	0.193357
549	0.175103	0.143913	0.191271		549	0.176112	0.236076	0.19112
550	0.173667	0.144962	0.190343		550	0.173743	0.234551	0.193475
551	0.172123	0.144313	0.187651		551	0.172827	0.233915	0.196167
552	0.173439	0.14196	0.189299		552	0.171991	0.236917	0.195786
553	0.175972	0.140567	0.186736		553	0.170919	0.23791	0.191823
554	0.178857	0.140113	0.186997		554	0.171818	0.236449	0.189698
555	0.18082	0.139484	0.188092		555	0.175225	0.235881	0.187595
556	0.183451	0.139589	0.186741		556	0.177722	0.234543	0.18669
557	0.183085	0.139164	0.186692		557	0.179339	0.231882	0.184984
558	0.179587	0.140524	0.18826		558	0.180222	0.232112	0.184725
559	0.175246	0.144901	0.188097		559	0.180074	0.229727	0.18747
560	0.172418	0.143725	0.187478		560	0.18176	0.228122	0.187185
561	0.16749	0.14682	0.188865		561	0.181333	0.230247	0.186293
562	0.165245	0.149012	0.188274		562	0.17947	0.228003	0.185936
563	0.168419	0.14868	0.188822		563	0.179427	0.224662	0.185176
564	0.166701	0.144826	0.19019		564	0.178246	0.222597	0.181612
565	0.167842	0.146882	0.189438		565	0.176167	0.221776	0.179338
566	0.170455	0.143933	0.189781		566	0.176345	0.21765	0.178988
567	0.170047	0.145131	0.190402		567	0.178812	0.218221	0.179422
568	0.169545	0.145351	0.189251		568	0.179775	0.218736	0.180203
569	0.173007	0.144205	0.187461		569	0.18076	0.220877	0.181214
570	0.172892	0.143972	0.187497		570	0.181962	0.222693	0.182382
571	0.17345	0.142136	0.185961		571	0.183118	0.222804	0.180697
572	0.174027	0.142126	0.18349		572	0.183737	0.221253	0.177532
573	0.175081	0.142051	0.185756		573	0.184273	0.218618	0.174406
574	0.174135	0.140672	0.187373		574	0.184402	0.216467	0.173582
575	0.176598	0.143481	0.186015		575	0.184086	0.21252	0.172572
576	0.174537	0.141614	0.186917		576	0.183692	0.210518	0.171286
577	0.175557	0.140713	0.188044		577	0.180461	0.209096	0.172231
578	0.173955	0.142209	0.184613		578	0.177972	0.207755	0.17366
579	0.173753	0.147828	0.183308		579	0.17632	0.206529	0.173083
580	0.172657	0.145618	0.184874		580	0.175678	0.206205	0.171726
581	0.173435	0.147061	0.183274		581	0.173364	0.206358	0.175047
582	0.172848	0.14973	0.183558		582	0.172617	0.20564	0.1744
583	0.173554	0.147807	0.183365		583	0.173637	0.20602	0.174158
584	0.17425	0.145136	0.184685		584	0.173956	0.203912	0.172024
585	0.173885	0.145504	0.183243		585	0.173991	0.201836	0.173441
586	0.173642	0.147611	0.185265		586	0.175114	0.201658	0.172504
587	0.174075	0.145632	0.185832		587	0.174931	0.198498	0.172602
588	0.174171	0.1452	0.187946		588	0.173546	0.197813	0.170526
589	0.173854	0.145212	0.188166		589	0.17371	0.198922	0.174303
590	0.17494	0.147817	0.188198		590	0.172958	0.198371	0.170997
591	0.176051	0.150335	0.187042		591	0.171873	0.198596	0.16771
592	0.178703	0.149558	0.183975		592	0.172401	0.202062	0.168423
593	0.178645	0.149041	0.18276		593	0.171092	0.201122	0.170679
594	0.179852	0.151398	0.182077		594	0.169176	0.198905	0.16759
595	0.179954	0.148982	0.183075		595	0.169002	0.199179	0.170434
596	0.179829	0.145623	0.182725		596	0.168749	0.198679	0.171025
597	0.1775	0.148916	0.184795		597	0.167891	0.197928	0.169969
598	0.178538	0.151608	0.184023		598	0.168974	0.198996	0.166954
599	0.17904	0.151137	0.18181		599	0.169559	0.199395	0.168401
600	0.178572	0.150384	0.181543		600	0.168085	0.199522	0.168059
601	0.18244	0.152572	0.182193		601	0.167091	0.197773	0.167742
602	0.18812	0.150343	0.18238		602	0.166862	0.195695	0.166225
603	0.192855	0.151444	0.186513		603	0.166991	0.195536	0.166246
604	0.197945	0.153915	0.185714		604	0.166142	0.19289	0.165506
605	0.204296	0.154055	0.184143		605	0.166519	0.191475	0.163569
606	0.208236	0.154132	0.182197		606	0.166675	0.191196	0.164929
607	0.213185	0.154863	0.181662		607	0.16641	0.191754	0.16739
608	0.218435	0.156139	0.179306		608	0.165468	0.189805	0.168693
609	0.220378	0.151784	0.181294		609	0.165509	0.189479	0.170903
610	0.221807	0.150828	0.181118		610	0.165586	0.18906	0.172483
611	0.221795	0.156044	0.183229		611	0.165605	0.188497	0.171295
612	0.222174	0.157369	0.182843		612	0.166068	0.188198	0.170226
613	0.218115	0.154668	0.180255		613	0.165281	0.188421	0.170843
614	0.215057	0.160531	0.179664		614	0.166757	0.188994	0.167367
615	0.212778	0.163247	0.181427		615	0.167552	0.190577	0.166372
616	0.209693	0.16041	0.178578		616	0.166731	0.191239	0.165507
617	0.201769	0.157199	0.177219		617	0.165591	0.190941	0.165099
618	0.197342	0.163806	0.179379		618	0.166344	0.190822	0.163773
619	0.198232	0.160034	0.177927		619	0.164265	0.191779	0.164186
620	0.19834	0.160123	0.17985		620	0.16268	0.188015	0.165301
621	0.196333	0.161567	0.181771		621	0.161538	0.187776	0.16633
622	0.195446	0.162831	0.183284		622	0.159485	0.187135	0.163411
623	0.195018	0.158371	0.180629		623	0.158915	0.185838	0.163582
624	0.191411	0.159234	0.183903		624	0.158651	0.185796	0.163931
625	0.188485	0.156688	0.182765		625	0.157727	0.188779	0.164822
626	0.189392	0.156711	0.180344		626	0.158213	0.187703	0.166587
627	0.18786	0.15439	0.180445		627	0.160195	0.187499	0.168005
628	0.190256	0.152088	0.182223		628	0.161369	0.189077	0.168863
629	0.190351	0.147608	0.180011		629	0.16055	0.188523	0.170051
630	0.189405	0.148556	0.178765		630	0.159897	0.187729	0.167728
631	0.189719	0.14043	0.181881		631	0.161137	0.188851	0.164371
632	0.195244	0.143289	0.181081		632	0.161012	0.187979	0.16584
633	0.192927	0.139898	0.182001		633	0.159298	0.187056	0.166061
634	0.19298	0.140752	0.183609		634	0.160525	0.187018	0.166156
635	0.192324	0.139691	0.182011		635	0.159816	0.187845	0.166297
636	0.193281	0.143321	0.180368		636	0.159322	0.185401	0.169449
637	0.189886	0.143826	0.180339		637	0.16024	0.186647	0.1708
638	0.192852	0.147321	0.178632		638	0.16179	0.184798	0.170063
639	0.19677	0.150971	0.176097		639	0.162049	0.184945	0.170839
640	0.19758	0.150097	0.176695		640	0.164151	0.183959	0.171464
641	0.198335	0.149173	0.176445		641	0.164477	0.183217	0.17094
642	0.196327	0.145081	0.176509		642	0.164745	0.185558	0.169141
643	0.192454	0.141518	0.176723		643	0.163371	0.185548	0.16886
644	0.188051	0.136173	0.1777		644	0.163218	0.1857	0.167953
645	0.188421	0.135954	0.178757		645	0.163168	0.185225	0.16761
646	0.184106	0.140401	0.180402		646	0.163631	0.188033	0.165875
647	0.18254	0.142573	0.182193		647	0.162448	0.187767	0.166058
648	0.179574	0.148216	0.183976		648	0.163486	0.188699	0.166614
649	0.178132	0.150106	0.186827		649	0.162951	0.187094	0.165924
650	0.174369	0.155108	0.187946		650	0.163564	0.188262	0.167189
651	0.174109	0.153522	0.189844		651	0.162531	0.185999	0.168295
652	0.174795	0.153594	0.187879		652	0.161774	0.181013	0.168476
653	0.176693	0.155756	0.187325		653	0.16081	0.182054	0.166816
654	0.17853	0.158394	0.184772		654	0.163139	0.18348	0.165587
655	0.182452	0.159691	0.184761		655	0.163131	0.182656	0.165618
656	0.181615	0.160061	0.182925		656	0.164021	0.186202	0.16672
657	0.183824	0.164841	0.186852		657	0.167008	0.188382	0.167703
658	0.182015	0.162831	0.188645		658	0.168209	0.187049	0.170139
659	0.179921	0.166668	0.191521		659	0.167077	0.187697	0.172521
660	0.177001	0.163509	0.191733		660	0.166288	0.187869	0.172075
661	0.177635	0.161707	0.192252		661	0.165037	0.184198	0.173834
662	0.175379	0.162026	0.187719		662	0.163952	0.183401	0.178416
663	0.176258	0.164647	0.185515		663	0.163858	0.183558	0.181745
664	0.177544	0.162004	0.182355		664	0.164984	0.179999	0.184802
665	0.175399	0.161831	0.181323		665	0.164962	0.17815	0.188801
666	0.173242	0.164573	0.181042		666	0.166274	0.177974	0.186065
667	0.171485	0.163797	0.184145		667	0.164985	0.178349	0.181801
668	0.173562	0.160525	0.184199		668	0.166113	0.176623	0.178872
669	0.169622	0.159877	0.185603		669	0.164789	0.177548	0.177036
670	0.170429	0.158613	0.185392		670	0.164615	0.179301	0.175719
671	0.169036	0.15526	0.183182		671	0.164683	0.179115	0.178476
672	0.171909	0.15203	0.181364		672	0.168445	0.175382	0.179921
673	0.169706	0.151312	0.18329		673	0.168679	0.176821	0.181477
674	0.17004	0.148994	0.183684		674	0.171215	0.176426	0.183271
675	0.171566	0.148273	0.183698		675	0.174051	0.176797	0.182439
676	0.172338	0.147811	0.183813		676	0.176274	0.175673	0.182456
677	0.172041	0.145321	0.182395		677	0.176046	0.177551	0.180725
678	0.171331	0.141558	0.178838		678	0.17833	0.175915	0.18072
679	0.171121	0.143708	0.177697		679	0.179176	0.177116	0.178397
680	0.168614	0.143368	0.176603		680	0.180427	0.174022	0.175104
681	0.169463	0.142731	0.176827		681	0.180346	0.175763	0.173225
682	0.16861	0.143978	0.176979		682	0.179161	0.175949	0.172593
683	0.168305	0.144258	0.177439		683	0.17759	0.176007	0.171355
684	0.170318	0.142453	0.17515		684	0.174161	0.174087	0.170868
685	0.169983	0.144782	0.173187		685	0.171475	0.174722	0.172485
686	0.171761	0.145675	0.172475		686	0.168929	0.174733	0.170993
687	0.168451	0.144147	0.171955		687	0.16789	0.1744	0.171758
688	0.168975	0.145335	0.170451		688	0.165939	0.173692	0.1719
689	0.168027	0.144912	0.172178		689	0.166755	0.173075	0.170575
690	0.168097	0.142345	0.17335		690	0.165099	0.174437	0.171186
691	0.164189	0.140089	0.173917		691	0.165136	0.175516	0.170492
692	0.164765	0.140955	0.172812		692	0.164381	0.177046	0.169578
693	0.164419	0.143138	0.173749		693	0.162252	0.176366	0.167579
694	0.164958	0.140764	0.174071		694	0.159867	0.178036	0.167111
695	0.164022	0.144005	0.172414		695	0.160828	0.177742	0.165395
696	0.166402	0.14625	0.170453		696	0.158996	0.174729	0.167488
697	0.169121	0.147398	0.171769		697	0.159001	0.171666	0.1667
698	0.168308	0.148392	0.169143		698	0.157695	0.171005	0.166607
699	0.166682	0.148212	0.166504		699	0.156241	0.172003	0.162926
700	0.164825	0.144534	0.168868		700	0.155057	0.169686	0.16225
701	0.161501	0.141299	0.169587		701	0.15469	0.169853	0.159734
702	0.160237	0.138416	0.167494		702	0.152187	0.171797	0.159876
703	0.158906	0.135358	0.169096		703	0.151869	0.1744	0.161208
704	0.156911	0.138384	0.171373		704	0.152118	0.173313	0.166568
705	0.158643	0.140944	0.169517		705	0.150836	0.175239	0.169105
706	0.160073	0.144409	0.170829		706	0.152042	0.174789	0.16786
707	0.158467	0.146215	0.172299		707	0.15425	0.174949	0.166051
708	0.158168	0.147725	0.171932		708	0.154721	0.175166	0.164972
709	0.161772	0.147792	0.1704		709	0.154385	0.174879	0.163752
710	0.161997	0.14609	0.171639		710	0.153196	0.175304	0.160372
711	0.163084	0.144317	0.170115		711	0.151877	0.174692	0.16209
712	0.162695	0.14275	0.168913		712	0.149551	0.174832	0.162905
713	0.162834	0.142186	0.169336		713	0.148628	0.174316	0.162566
714	0.159152	0.141851	0.169305		714	0.148435	0.173689	0.163812
715	0.159084	0.139834	0.167989		715	0.149132	0.172121	0.16414
716	0.157238	0.14206	0.166542		716	0.148729	0.173224	0.162866
717	0.158829	0.144236	0.166074		717	0.148652	0.174697	0.163143
718	0.159052	0.141131	0.165533		718	0.150185	0.17467	0.163338
719	0.15919	0.140384	0.162929		719	0.149925	0.173687	0.160927
720	0.155765	0.141575	0.162678		720	0.148531	0.174029	0.162658
721	0.154992	0.137416	0.162388		721	0.148411	0.173182	0.164271
722	0.15334	0.135111	0.16406		722	0.148111	0.17097	0.165039
723	0.153236	0.135486	0.163414		723	0.145885	0.169328	0.16587
724	0.15579	0.136445	0.163635		724	0.145968	0.170378	0.165373
725	0.158475	0.136327	0.164578		725	0.148031	0.171033	0.164793
726	0.159216	0.136857	0.166798		726	0.147564	0.174404	0.166798
727	0.159004	0.136012	0.165513		727	0.147171	0.17405	0.166342
728	0.160719	0.139846	0.167616		728	0.147753	0.17461	0.165506
729	0.157058	0.138315	0.168694		729	0.147093	0.173232	0.165623
730	0.158172	0.138279	0.168009		730	0.147903	0.173366	0.166017
731	0.158896	0.139358	0.168268		731	0.146791	0.171723	0.16561
732	0.158167	0.139962	0.166939		732	0.149747	0.174034	0.166129
733	0.15693	0.139188	0.166213		733	0.149651	0.174882	0.166096
734	0.158103	0.139906	0.165245		734	0.149695	0.174261	0.166774
735	0.157657	0.139923	0.165931		735	0.147222	0.174575	0.166622
736	0.155901	0.137219	0.16353		736	0.148487	0.173343	0.166839
737	0.158875	0.137363	0.165307		737	0.14547	0.170442	0.164838
738	0.159428	0.136432	0.162757		738	0.144897	0.170535	0.164869
739	0.160168	0.132867	0.163139		739	0.143966	0.171735	0.16481
740	0.158586	0.133867	0.161854		740	0.144068	0.169789	0.165216
741	0.159266	0.135994	0.162652		741	0.14215	0.16957	0.16396
742	0.157136	0.138521	0.163636		742	0.143231	0.171024	0.165499
743	0.156552	0.135808	0.164953		743	0.144352	0.172238	0.164862
744	0.156192	0.141313	0.166614		744	0.144673	0.173602	0.165119
745	0.158099	0.140868	0.166107		745	0.143171	0.172188	0.163578
746	0.159607	0.139557	0.166525		746	0.143716	0.171	0.161836
747	0.160212	0.135034	0.166845		747	0.142903	0.171143	0.162357
748	0.162008	0.138543	0.167944		748	0.142385	0.170739	0.162116
749	0.162627	0.137964	0.169071		749	0.144332	0.171974	0.161103
750	0.162573	0.138155	0.170359		750	0.145427	0.174584	0.161929
751	0.161047	0.139762	0.170063		751	0.14636	0.176431	0.162809
752	0.163353	0.140348	0.170209		752	0.14479	0.175157	0.164774
753	0.160826	0.141831	0.16845		753	0.143858	0.175227	0.164103
754	0.159834	0.137409	0.166204		754	0.142518	0.172941	0.163652
755	0.161256	0.138441	0.16492		755	0.143141	0.171993	0.16442
756	0.162929	0.138633	0.163108		756	0.142545	0.172212	0.165164
757	0.159302	0.142348	0.159443		757	0.143428	0.171367	0.163894
758	0.158132	0.139057	0.157692		758	0.144257	0.170111	0.164831
759	0.157696	0.139574	0.158331		759	0.144287	0.170222	0.167765
760	0.155542	0.136949	0.159043		760	0.144199	0.169453	0.167957
761	0.152389	0.137016	0.159535		761	0.143947	0.169177	0.16619
762	0.15447	0.135503	0.1627		762	0.143712	0.17135	0.165853
763	0.15522	0.139029	0.165608		763	0.14389	0.169562	0.164298
764	0.158133	0.137797	0.165484		764	0.143066	0.169477	0.161813
765	0.160199	0.137255	0.165375		765	0.141382	0.172349	0.159726
766	0.160232	0.136795	0.169164		766	0.141985	0.171918	0.159022
767	0.159636	0.137549	0.166994		767	0.141878	0.170622	0.15832
768	0.163614	0.135441	0.16725		768	0.143088	0.170548	0.160403
769	0.162398	0.13862	0.164567		769	0.145089	0.171966	0.160247
770	0.163473	0.141155	0.163825		770	0.146047	0.170945	0.162185
771	0.164926	0.140663	0.162251		771	0.145925	0.17277	0.162867
772	0.162725	0.142623	0.16149		772	0.146993	0.172384	0.162903
773	0.161252	0.14138	0.162274		773	0.146378	0.173082	0.161948
774	0.159571	0.141482	0.164358		774	0.146102	0.172371	0.163967
775	0.156203	0.139947	0.166164		775	0.147009	0.171641	0.163482
776	0.15832	0.142973	0.16461		776	0.146776	0.171406	0.165689
777	0.158377	0.143547	0.166064		777	0.145385	0.174162	0.163065
778	0.155824	0.144118	0.164163		778	0.143195	0.174034	0.164401
779	0.155355	0.142148	0.163662		779	0.141686	0.174061	0.161168
780	0.156466	0.141965	0.161383		780	0.14137	0.174782	0.159558
781	0.155112	0.138663	0.162623		781	0.140346	0.172751	0.158918
782	0.158387	0.1363	0.163782		782	0.140657	0.170694	0.162263
783	0.161831	0.140208	0.162431		783	0.142412	0.172523	0.162637
784	0.164049	0.140319	0.162045		784	0.143288	0.171064	0.16361
785	0.16516	0.140713	0.162228		785	0.14318	0.170671	0.164738
786	0.165122	0.1431	0.163482		786	0.144622	0.172229	0.165724
787	0.162539	0.14345	0.16027		787	0.145199	0.173562	0.165375
788	0.160199	0.136311	0.16199		788	0.145206	0.17239	0.164625
789	0.159625	0.138318	0.16346		789	0.14441	0.174235	0.16753
790	0.157323	0.137242	0.162954		790	0.144617	0.173814	0.167336
791	0.157816	0.138653	0.160475		791	0.144683	0.172646	0.164172
792	0.15836	0.134745	0.162086		792	0.145059	0.173066	0.163528
793	0.159144	0.139197	0.161126		793	0.145338	0.17365	0.164676
794	0.157905	0.135895	0.16128		794	0.145225	0.172636	0.163685
795	0.160121	0.137822	0.163391		795	0.145445	0.17356	0.162517
796	0.158523	0.136313	0.163707		796	0.144345	0.173983	0.16467
797	0.156892	0.140116	0.165135		797	0.142905	0.17215	0.166078
798	0.15539	0.136426	0.163552		798	0.142755	0.173296	0.165518
799	0.155934	0.140011	0.162887		799	0.143627	0.173714	0.163963
800	0.154134	0.138763	0.161869		800	0.143218	0.171998	0.166183
801	0.155341	0.138329	0.161792		801	0.143843	0.173072	0.166666
802	0.157102	0.139541	0.159077		802	0.14451	0.174427	0.165144
803	0.157503	0.141883	0.159409		803	0.143946	0.172325	0.16373
804	0.156798	0.142745	0.160424		804	0.143373	0.17274	0.165077
805	0.15485	0.144537	0.162726		805	0.142527	0.174716	0.165387
806	0.155779	0.144115	0.162632		806	0.142905	0.175283	0.163084
807	0.153097	0.141357	0.162761		807	0.143509	0.174837	0.162745
808	0.155666	0.142592	0.164407		808	0.144071	0.17546	0.162146
809	0.156491	0.142501	0.162712		809	0.145858	0.17577	0.162991
810	0.159553	0.145587	0.160028		810	0.147174	0.175386	0.162369
811	0.159191	0.144169	0.16024		811	0.147639	0.175421	0.163326
812	0.160071	0.141677	0.163216		812	0.149327	0.174658	0.164616
813	0.158015	0.138991	0.16175		813	0.149033	0.175901	0.165154
814	0.15569	0.13736	0.162244		814	0.148429	0.176181	0.165658
815	0.153705	0.134069	0.161417		815	0.147412	0.175304	0.16463
816	0.153561	0.138104	0.161047		816	0.146731	0.173439	0.166966
817	0.153613	0.14539	0.159704		817	0.144651	0.173665	0.165663
818	0.15306	0.146411	0.160111		818	0.144654	0.172297	0.166083
819	0.154227	0.148558	0.160402		819	0.14434	0.17333	0.163393
820	0.156551	0.147924	0.160959		820	0.144688	0.172586	0.164355
821	0.154917	0.147452	0.163269		821	0.144898	0.174653	0.164309
822	0.155708	0.146924	0.162073		822	0.147079	0.175279	0.166256
823	0.155647	0.146434	0.16362		823	0.147195	0.176221	0.165925
824	0.157812	0.144671	0.162762		824	0.146869	0.174547	0.165992
825	0.155785	0.145244	0.163317		825	0.149419	0.176285	0.167915
826	0.153775	0.14354	0.163077		826	0.15019	0.177285	0.165396
827	0.153626	0.140714	0.164959		827	0.149286	0.174476	0.16277
828	0.151983	0.140557	0.165772		828	0.14964	0.172169	0.16215
829	0.149799	0.138738	0.165838		829	0.149932	0.174257	0.16536
830	0.150403	0.138943	0.166167		830	0.148977	0.17462	0.161903
831	0.153892	0.139465	0.164664		831	0.149424	0.170545	0.16183
832	0.1558	0.139026	0.162579		832	0.149029	0.172836	0.163659
833	0.157808	0.13935	0.160418		833	0.149212	0.174238	0.164968
834	0.158437	0.142075	0.161763		834	0.148483	0.171334	0.163128
835	0.157701	0.14215	0.161785		835	0.146631	0.171764	0.164119
836	0.15719	0.140831	0.161636		836	0.144556	0.17367	0.166116
837	0.15643	0.14212	0.164202		837	0.144284	0.171821	0.165361
838	0.155845	0.141551	0.164163		838	0.143159	0.173407	0.165326
839	0.157094	0.139277	0.162601		839	0.142653	0.172442	0.166558
840	0.156818	0.137612	0.161544		840	0.144158	0.172563	0.169337
841	0.158767	0.136635	0.162917		841	0.143832	0.173334	0.16838
842	0.156079	0.138723	0.161338		842	0.142896	0.174572	0.168742
843	0.156328	0.141015	0.161927		843	0.144457	0.174262	0.169214
844	0.154968	0.141069	0.161655		844	0.144594	0.175196	0.165359
845	0.154249	0.139955	0.162503		845	0.144093	0.174213	0.164284
846	0.150965	0.141493	0.16063		846	0.145119	0.173844	0.163599
847	0.152774	0.138378	0.160519		847	0.145748	0.174129	0.162003
848	0.153167	0.136341	0.161322		848	0.144727	0.174305	0.160997
849	0.153754	0.137183	0.162396		849	0.146151	0.174285	0.161799
850	0.156176	0.137568	0.161673		850	0.147633	0.174071	0.160462
851	0.158742	0.13958	0.162352		851	0.146774	0.172245	0.159867
852	0.162015	0.13679	0.163146		852	0.146717	0.175457	0.158663
853	0.160551	0.13763	0.164548		853	0.144974	0.175192	0.158463
854	0.161071	0.135475	0.163069		854	0.144012	0.175293	0.160737
855	0.161456	0.137022	0.16392		855	0.142644	0.173894	0.159789
856	0.159536	0.13785	0.163587		856	0.142782	0.17647	0.161187
857	0.156888	0.140951	0.163547		857	0.144773	0.172709	0.166047
858	0.158258	0.141018	0.162916		858	0.147991	0.173134	0.167209
859	0.156499	0.143787	0.164205		859	0.149083	0.174837	0.166833
860	0.155503	0.142097	0.162931		860	0.149205	0.17526	0.166391
861	0.158452	0.139636	0.161951		861	0.149288	0.174987	0.164485
862	0.158255	0.139704	0.161415		862	0.146547	0.175437	0.162949
863	0.157518	0.137967	0.16018		863	0.144801	0.173112	0.162891
864	0.157662	0.139137	0.162142		864	0.144833	0.171678	0.163248
865	0.15791	0.14182	0.163684		865	0.143993	0.172098	0.163092
866	0.155367	0.142194	0.162045		866	0.144336	0.170303	0.164968
867	0.157255	0.140023	0.161403		867	0.146231	0.171737	0.162983
868	0.158398	0.144663	0.160611		868	0.147244	0.172659	0.162108
869	0.160462	0.144165	0.160005		869	0.146778	0.172768	0.162878
870	0.160658	0.142248	0.158464		870	0.145688	0.17313	0.164215
871	0.158301	0.141182	0.159996		871	0.146278	0.172007	0.163775
872	0.157316	0.142484	0.159895		872	0.145579	0.170063	0.165139
873	0.156081	0.140801	0.158886		873	0.144981	0.169475	0.165915
874	0.156225	0.13931	0.158896		874	0.144381	0.169674	0.163997
875	0.155102	0.143128	0.15898		875	0.146155	0.1696	0.162489
876	0.155075	0.142307	0.15868		876	0.1462	0.170443	0.162965
877	0.15181	0.141968	0.158866		877	0.144712	0.170161	0.163181
878	0.151897	0.144779	0.160408		878	0.145715	0.168995	0.160596
879	0.14995	0.146519	0.159234		879	0.144869	0.167844	0.160579
880	0.151298	0.142633	0.159467		880	0.143721	0.169467	0.160483
881	0.154745	0.14501	0.161014		881	0.142046	0.169862	0.15998
882	0.155501	0.145056	0.162138		882	0.14209	0.172412	0.159801
883	0.155598	0.144814	0.162263		883	0.142283	0.174303	0.161352
884	0.154988	0.145712	0.162506		884	0.143927	0.174896	0.160386
885	0.154107	0.151903	0.161681		885	0.1436	0.173659	0.164527
886	0.1525	0.149382	0.161388		886	0.145299	0.174652	0.164389
887	0.153164	0.150659	0.160528		887	0.14577	0.172606	0.164089
888	0.152193	0.149922	0.1614		888	0.145934	0.171181	0.163127
889	0.152956	0.14569	0.159707		889	0.145875	0.172315	0.163473
890	0.152417	0.142447	0.160415		890	0.147101	0.1711	0.163326
891	0.15373	0.143113	0.161283		891	0.146655	0.169103	0.164442
892	0.152748	0.14359	0.161388		892	0.148313	0.16962	0.164866
893	0.153712	0.141219	0.158921		893	0.148482	0.171384	0.164866
894	0.152326	0.143107	0.159993		894	0.148974	0.170789	0.164799
895	0.150826	0.14243	0.158871		895	0.148331	0.170283	0.162793
896	0.14919	0.14703	0.156163		896	0.14768	0.172498	0.161983
897	0.152511	0.145301	0.156508		897	0.147335	0.172489	0.160297
898	0.151357	0.145458	0.159951		898	0.145392	0.170806	0.162652
899	0.149889	0.145316	0.161206		899	0.143699	0.172658	0.163783
900	0.150815	0.147311	0.164216		900	0.144085	0.173818	0.163013
901	0.149986	0.143238	0.164351		901	0.14521	0.175137	0.162813
902	0.148133	0.14319	0.1633		902	0.144196	0.174675	0.165617
903	0.149945	0.143712	0.162761		903	0.14371	0.174505	0.164148
904	0.152461	0.143203	0.16141		904	0.14448	0.174563	0.16405
905	0.153394	0.136599	0.160088		905	0.143078	0.174768	0.164555
906	0.153067	0.137117	0.162967		906	0.142444	0.172932	0.165609
907	0.152944	0.136055	0.164705		907	0.144143	0.175141	0.165441
908	0.15218	0.137768	0.162501		908	0.146336	0.1761	0.166745
909	0.151708	0.140349	0.162887		909	0.145658	0.173145	0.165284
910	0.152012	0.14403	0.163196		910	0.146909	0.175306	0.168063
911	0.15163	0.146339	0.161956		911	0.147262	0.174785	0.165626
912	0.15327	0.147812	0.16016		912	0.145288	0.174317	0.163898
913	0.15197	0.149963	0.161195		913	0.144578	0.17372	0.161623
914	0.151875	0.148892	0.160965		914	0.144397	0.175165	0.162646
915	0.151801	0.149021	0.161936		915	0.143911	0.172138	0.158447
916	0.151693	0.147599	0.162032		916	0.144277	0.173451	0.160819
917	0.150938	0.151373	0.163175		917	0.144338	0.171155	0.161451
918	0.152501	0.148672	0.162685		918	0.144403	0.172919	0.161541
919	0.153684	0.14784	0.16379		919	0.144663	0.172614	0.161166
920	0.152151	0.148158	0.163824		920	0.144738	0.17166	0.163544
921	0.155794	0.149361	0.163284		921	0.146403	0.173167	0.162897
922	0.15322	0.14744	0.163576		922	0.146344	0.17347	0.162427
923	0.153494	0.146363	0.162838		923	0.145623	0.173842	0.163585
924	0.151327	0.145827	0.162992		924	0.145486	0.173955	0.164864
925	0.152449	0.146853	0.162525		925	0.145086	0.174851	0.163205
926	0.149806	0.148679	0.163719		926	0.141861	0.173275	0.162573
927	0.150497	0.14781	0.163058		927	0.142629	0.174396	0.161569
928	0.149791	0.146574	0.164558		928	0.142075	0.172151	0.160981
929	0.151248	0.147062	0.162561		929	0.14211	0.171168	0.163288
930	0.149424	0.147204	0.162405		930	0.141556	0.171764	0.163135
931	0.150033	0.141149	0.161778		931	0.141857	0.169019	0.162948
932	0.151345	0.141343	0.160439		932	0.140573	0.167183	0.163505
933	0.15197	0.142181	0.161182		933	0.139693	0.168259	0.164693
934	0.152158	0.14097	0.161547		934	0.140321	0.169727	0.160489
935	0.154165	0.139452	0.161718		935	0.142009	0.16993	0.160455
936	0.154411	0.141425	0.162779		936	0.142264	0.169375	0.161345
937	0.152977	0.141773	0.164273		937	0.144452	0.171262	0.163796
938	0.15484	0.141007	0.164638		938	0.147142	0.170195	0.164103
939	0.155419	0.145161	0.164698		939	0.145862	0.167753	0.167885
940	0.153127	0.144797	0.163577		940	0.145947	0.16825	0.167469
941	0.152243	0.144969	0.162496		941	0.145425	0.168354	0.166118
942	0.152605	0.143715	0.162911		942	0.145408	0.167448	0.165447
943	0.149662	0.144756	0.160739		943	0.144775	0.170149	0.16489
944	0.148928	0.142376	0.159712		944	0.145875	0.171144	0.162428
945	0.150874	0.144149	0.159176		945	0.146576	0.170936	0.164714
946	0.152345	0.14337	0.15886		946	0.148878	0.173072	0.168365
947	0.153121	0.142532	0.15711		947	0.148965	0.176953	0.167204
948	0.155029	0.144315	0.159653		948	0.149179	0.176776	0.164557
949	0.155893	0.144015	0.161141		949	0.151143	0.175408	0.163194
950	0.155867	0.142697	0.161494		950	0.149903	0.174942	0.1629
951	0.154524	0.142629	0.16232		951	0.148868	0.172258	0.1582
952	0.153532	0.142192	0.163219		952	0.146699	0.168907	0.156562
953	0.148983	0.141463	0.160228		953	0.147238	0.166605	0.16001
954	0.148262	0.140739	0.159702		954	0.145829	0.170437	0.160809
955	0.147938	0.136292	0.160691		955	0.145573	0.171129	0.160531
956	0.146962	0.136411	0.159558		956	0.144464	0.173458	0.163069
957	0.147545	0.140244	0.161614		957	0.146337	0.17152	0.165398
958	0.150854	0.135973	0.162072		958	0.144678	0.173861	0.164674
959	0.152374	0.138246	0.162049		959	0.14425	0.170901	0.1648
960	0.153768	0.14053	0.162171		960	0.14326	0.171382	0.162575
961	0.156404	0.143479	0.161481		961	0.144856	0.171258	0.160939
962	0.154394	0.142209	0.159215		962	0.144247	0.173953	0.159843
963	0.152811	0.145011	0.161965		963	0.14364	0.171137	0.157838
964	0.151201	0.143052	0.161068		964	0.144523	0.171086	0.158061
965	0.149456	0.147466	0.161511		965	0.146477	0.169074	0.158177
966	0.148849	0.143958	0.163489		966	0.148227	0.169193	0.160563
967	0.150574	0.145844	0.163022		967	0.148125	0.169515	0.160647
968	0.151025	0.166858	0.159782		968	0.149089	0.17082	0.161502
969	0.150651	0.203354	0.161533		969	0.14875	0.171452	0.160992
970	0.149488	0.236425	0.162449		970	0.148999	0.172378	0.161781
971	0.149051	0.27579	0.164141		971	0.147311	0.173213	0.161599
972	0.148737	0.304343	0.16593		972	0.148161	0.174382	0.162498
973	0.14791	0.325682	0.170023		973	0.149617	0.176143	0.164606
974	0.148272	0.326858	0.178914		974	0.15181	0.178113	0.165152
975	0.150529	0.326273	0.193444		975	0.152819	0.181392	0.165489
976	0.151804	0.327093	0.210026		976	0.153146	0.183273	0.165149
977	0.152066	0.333599	0.230256		977	0.154119	0.183995	0.166572
978	0.153414	0.331768	0.248469		978	0.153442	0.188693	0.164546
979	0.15295	0.330022	0.259028		979	0.151842	0.192255	0.165551
980	0.152282	0.337768	0.263668		980	0.15277	0.19517	0.167066
981	0.148256	0.331843	0.264923		981	0.157752	0.195794	0.167389
982	0.147917	0.331856	0.263987		982	0.159722	0.195394	0.165965
983	0.147024	0.326549	0.264244		983	0.162792	0.191262	0.16791
984	0.147266	0.320641	0.267301		984	0.166731	0.187467	0.167974
985	0.146014	0.310124	0.268256		985	0.168019	0.185761	0.169766
986	0.149528	0.315753	0.270192		986	0.165406	0.186861	0.171541
987	0.152415	0.311586	0.271925		987	0.167515	0.1847	0.175799
988	0.153152	0.302175	0.272032		988	0.16985	0.185449	0.180473
989	0.15154	0.309988	0.269319		989	0.170535	0.185351	0.187568
990	0.151823	0.309994	0.27061		990	0.173405	0.185102	0.192133
991	0.149738	0.306603	0.26977		991	0.177192	0.183193	0.198802
992	0.146871	0.300592	0.267548		992	0.180283	0.184978	0.216006
993	0.145027	0.303602	0.266788		993	0.182474	0.182484	0.239477
994	0.147939	0.292159	0.268283		994	0.18692	0.180215	0.26217
995	0.148867	0.286654	0.26569		995	0.192591	0.178726	0.29303
996	0.149326	0.273437	0.265336		996	0.197352	0.176984	0.320563
997	0.149499	0.269263	0.264807		997	0.202692	0.177455	0.332879
998	0.153302	0.267575	0.263345		998	0.210015	0.177464	0.341406
999	0.152535	0.263211	0.263812		999	0.214273	0.180287	0.340344
1000	0.151994	0.26071	0.260119		1000	0.219108	0.1795	0.336753
1001	0.151192	0.260019	0.257201		1001	0.226871	0.180387	0.330245
1002	0.152254	0.263518	0.257437		1002	0.232153	0.178421	0.323506
1003	0.152814	0.257898	0.256899		1003	0.237632	0.176393	0.317816
1004	0.150971	0.256017	0.252812		1004	0.248082	0.175329	0.311294
1005	0.153558	0.252074	0.253582		1005	0.251745	0.173867	0.304903
1006	0.153576	0.251746	0.252604		1006	0.25591	0.173262	0.303156
1007	0.152391	0.240589	0.249279		1007	0.262042	0.172516	0.296755
1008	0.151453	0.232158	0.245339		1008	0.266678	0.174685	0.286437
1009	0.154809	0.232125	0.244928		1009	0.264275	0.172905	0.285367
1010	0.152088	0.229606	0.244367		1010	0.266324	0.173473	0.278588
1011	0.153381	0.223801	0.244571		1011	0.262611	0.174015	0.26808
1012	0.15408	0.22555	0.244949		1012	0.253595	0.174181	0.26389
1013	0.152041	0.228581	0.244384		1013	0.245661	0.17449	0.262983
1014	0.151439	0.226569	0.241834		1014	0.240991	0.175591	0.26031
1015	0.151934	0.223184	0.238926		1015	0.23599	0.174794	0.255768
1016	0.154695	0.225037	0.236065		1016	0.231193	0.173765	0.255049
1017	0.156299	0.21937	0.234338		1017	0.231504	0.175664	0.25316
1018	0.15877	0.217767	0.232392		1018	0.229251	0.173922	0.249136
1019	0.159855	0.213125	0.232678		1019	0.228335	0.175334	0.246496
1020	0.16129	0.215249	0.230763		1020	0.223122	0.17722	0.243094
1021	0.161456	0.21296	0.227424		1021	0.222657	0.180255	0.244238
1022	0.162456	0.208517	0.2256		1022	0.219091	0.179289	0.246779
1023	0.162958	0.205179	0.225247		1023	0.217888	0.180336	0.246314
1024	0.163705	0.201755	0.223093		1024	0.212751	0.179412	0.243928
1025	0.165003	0.196513	0.220287		1025	0.213881	0.179044	0.244506
1026	0.16231	0.19213	0.220637		1026	0.209549	0.176624	0.239511
1027	0.163093	0.189645	0.218728		1027	0.208726	0.175746	0.234469
1028	0.163585	0.18429	0.217885		1028	0.202773	0.174254	0.23069
1029	0.161657	0.182528	0.214652		1029	0.200791	0.173513	0.231512
1030	0.160547	0.178093	0.21558		1030	0.194991	0.171456	0.230611
1031	0.161549	0.17396	0.212611		1031	0.193219	0.170491	0.231346
1032	0.1587	0.171055	0.209491		1032	0.187591	0.169762	0.230177
1033	0.156362	0.16885	0.206725		1033	0.18724	0.170051	0.228605
1034	0.158074	0.166022	0.205044		1034	0.186613	0.170109	0.222773
1035	0.158322	0.160298	0.2015		1035	0.184348	0.169973	0.222042
1036	0.157991	0.157994	0.199283		1036	0.181307	0.1698	0.218114
1037	0.157513	0.160626	0.197288		1037	0.179755	0.171618	0.216048
1038	0.158491	0.159747	0.197802		1038	0.178885	0.17232	0.216695
1039	0.158086	0.155013	0.194678		1039	0.176022	0.172064	0.219633
1040	0.158661	0.157275	0.191903		1040	0.173989	0.174071	0.218361
1041	0.160852	0.15137	0.190778		1041	0.173684	0.173171	0.220443
1042	0.163095	0.146843	0.189679		1042	0.17447	0.171572	0.220284
1043	0.163921	0.14176	0.185911		1043	0.171788	0.171446	0.218808
1044	0.163052	0.13839	0.184257		1044	0.170303	0.169778	0.218494
1045	0.160613	0.135827	0.183082		1045	0.171117	0.169791	0.216861
1046	0.158605	0.135148	0.181476		1046	0.171129	0.170575	0.210966
1047	0.15886	0.12999	0.179244		1047	0.169104	0.171786	0.20758
1048	0.156556	0.12821	0.175093		1048	0.16703	0.171134	0.206292
1049	0.154463	0.131501	0.172524		1049	0.166011	0.174533	0.202639
1050	0.155392	0.128744	0.169365		1050	0.16553	0.169955	0.198612
1051	0.155265	0.128628	0.167112		1051	0.162767	0.16998	0.198903
1052	0.151689	0.131369	0.165298		1052	0.161391	0.167903	0.199787
1053	0.15397	0.132606	0.1657		1053	0.161838	0.16903	0.197409
1054	0.155224	0.13192	0.16504		1054	0.161576	0.166695	0.195793
1055	0.155453	0.132773	0.165933		1055	0.160668	0.168654	0.196665
1056	0.15483	0.133134	0.165766		1056	0.159637	0.168652	0.195896
1057	0.155161	0.134563	0.166361		1057	0.158782	0.168637	0.194393
1058	0.155266	0.13658	0.163426		1058	0.158348	0.166893	0.189799
1059	0.155126	0.137149	0.163551		1059	0.15588	0.166556	0.186819
1060	0.154887	0.136701	0.162076		1060	0.155295	0.165886	0.184112
1061	0.154751	0.137432	0.161185		1061	0.155188	0.165508	0.179665
1062	0.154722	0.133673	0.161746		1062	0.155479	0.165571	0.17848
1063	0.151808	0.131772	0.163923		1063	0.1546	0.165201	0.180628
1064	0.152314	0.129066	0.162827		1064	0.154795	0.166139	0.18084
1065	0.151106	0.127853	0.162842		1065	0.153382	0.166309	0.18221
1066	0.153643	0.124758	0.162537		1066	0.15366	0.166274	0.183252
1067	0.155481	0.129466	0.163573		1067	0.152674	0.168157	0.181635
1068	0.156823	0.130643	0.162904		1068	0.153135	0.168887	0.179181
1069	0.15372	0.132586	0.163433		1069	0.151965	0.169002	0.175252
1070	0.152918	0.132281	0.163432		1070	0.151445	0.168951	0.172402
1071	0.149708	0.13419	0.162339		1071	0.150581	0.169118	0.171123
1072	0.147234	0.132282	0.159524		1072	0.14961	0.169397	0.170538
1073	0.146627	0.131455	0.159763		1073	0.14851	0.170317	0.17257
1074	0.149593	0.130185	0.160488		1074	0.150679	0.169238	0.174073
1075	0.152197	0.131335	0.161949		1075	0.149866	0.168604	0.172148
1076	0.153126	0.131973	0.162518		1076	0.149643	0.168167	0.172768
1077	0.154679	0.130967	0.161711		1077	0.150255	0.166959	0.171731
1078	0.155068	0.133131	0.161606		1078	0.151789	0.166543	0.168791
1079	0.154339	0.130971	0.160278		1079	0.150585	0.166461	0.168138
1080	0.152373	0.128041	0.158667		1080	0.151043	0.168794	0.170287
1081	0.150966	0.128508	0.159342		1081	0.151048	0.168954	0.16987
1082	0.149272	0.128689	0.158404		1082	0.150725	0.168324	0.169548
1083	0.150448	0.124259	0.157169		1083	0.149494	0.168587	0.168972
1084	0.15061	0.126667	0.159214		1084	0.147533	0.169267	0.168781
1085	0.152257	0.128983	0.15918		1085	0.148644	0.167029	0.165539
1086	0.153553	0.128736	0.159522		1086	0.146979	0.166145	0.164291
1087	0.154206	0.129323	0.160434		1087	0.146174	0.167514	0.164057
1088	0.152424	0.129227	0.159837		1088	0.145615	0.16758	0.161468
1089	0.153985	0.128979	0.157536		1089	0.148297	0.169027	0.160721
1090	0.154101	0.129883	0.158277		1090	0.146672	0.171149	0.160452
1091	0.153471	0.129273	0.156229		1091	0.147719	0.171653	0.159371
1092	0.153739	0.128559	0.156676		1092	0.148499	0.16897	0.158323
1093	0.153492	0.130821	0.159073		1093	0.148715	0.168447	0.161209
1094	0.151821	0.130238	0.160628		1094	0.147362	0.165304	0.161985
1095	0.150038	0.129735	0.161886		1095	0.147977	0.165884	0.162595
1096	0.150128	0.13039	0.163172		1096	0.148338	0.167389	0.161543
1097	0.150643	0.129149	0.162529		1097	0.148006	0.167309	0.159762
1098	0.15133	0.126958	0.160959		1098	0.147239	0.166811	0.159381
1099	0.151142	0.130539	0.159362		1099	0.146139	0.169912	0.157181
1100	0.152447	0.128669	0.158175		1100	0.145364	0.166695	0.156415
1101	0.152544	0.130791	0.158505		1101	0.146185	0.166196	0.158058
1102	0.152234	0.131095	0.158987		1102	0.144729	0.166792	0.160807
1103	0.15458	0.132535	0.159154		1103	0.145115	0.166589	0.157276
1104	0.154179	0.129406	0.160259		1104	0.145653	0.164005	0.157593
1105	0.15275	0.130752	0.161144		1105	0.145979	0.166173	0.157983
1106	0.153281	0.126368	0.158986		1106	0.143933	0.1637	0.155077
1107	0.153619	0.12971	0.158424		1107	0.144249	0.166383	0.152814
1108	0.151911	0.13295	0.157519		1108	0.144104	0.16642	0.153401
1109	0.151942	0.131258	0.156933		1109	0.143065	0.165468	0.15349
1110	0.151125	0.132661	0.157002		1110	0.142165	0.166827	0.151759
1111	0.151195	0.135557	0.158706		1111	0.145022	0.170128	0.153975
1112	0.148656	0.133806	0.158684		1112	0.146071	0.168244	0.154125
1113	0.14757	0.128248	0.161788		1113	0.146291	0.16795	0.154881
1114	0.149068	0.130546	0.162623		1114	0.148647	0.170472	0.154834
1115	0.150356	0.12808	0.160748		1115	0.150247	0.169289	0.158014
1116	0.148292	0.126772	0.161014		1116	0.147531	0.168142	0.159299
1117	0.150991	0.124709	0.161754		1117	0.146033	0.1691	0.159243
1118	0.149529	0.128344	0.159483		1118	0.145946	0.171114	0.161025
1119	0.149538	0.125956	0.157648		1119	0.145169	0.171234	0.159492
1120	0.147877	0.124811	0.158068		1120	0.14682	0.169643	0.156923
1121	0.149662	0.1259	0.155552		1121	0.146209	0.170752	0.152363
1122	0.150784	0.128884	0.155482		1122	0.148434	0.170753	0.151522
1123	0.152579	0.12867	0.155878		1123	0.149764	0.16688	0.151361
1124	0.152502	0.129343	0.156195		1124	0.149741	0.166686	0.151559
1125	0.152164	0.131641	0.154449		1125	0.147319	0.167341	0.152467
1126	0.152299	0.129823	0.157661		1126	0.147664	0.165572	0.155228
1127	0.150725	0.129209	0.156746		1127	0.147442	0.16423	0.155753
1128	0.149757	0.127047	0.155988		1128	0.147475	0.165742	0.154094
1129	0.148439	0.126808	0.157109		1129	0.146759	0.165535	0.153558
1130	0.149591	0.125658	0.158583		1130	0.147256	0.16478	0.152602
1131	0.148454	0.125037	0.157113		1131	0.147623	0.164413	0.152284
1132	0.149366	0.125638	0.159499		1132	0.147233	0.165308	0.151668
1133	0.148488	0.128953	0.160419		1133	0.146825	0.166503	0.152026
1134	0.148225	0.130043	0.158413		1134	0.147728	0.166504	0.152556
1135	0.148713	0.131469	0.159464		1135	0.147143	0.167621	0.15256
1136	0.14787	0.13349	0.158551		1136	0.148003	0.167653	0.151901
1137	0.147037	0.132215	0.155714		1137	0.146862	0.168016	0.153042
1138	0.14813	0.130333	0.155676		1138	0.142958	0.168862	0.151849
1139	0.147007	0.128385	0.156678		1139	0.143004	0.169069	0.154771
1140	0.148495	0.125844	0.154959		1140	0.143677	0.169685	0.156461
1141	0.148687	0.125004	0.155336		1141	0.142114	0.16848	0.154496
1142	0.14892	0.125855	0.156167		1142	0.141649	0.166362	0.154068
1143	0.149039	0.126695	0.155925		1143	0.145817	0.165741	0.153581
1144	0.151388	0.129159	0.156506		1144	0.145415	0.166362	0.152307
1145	0.150098	0.13174	0.158768		1145	0.144643	0.165415	0.152853
1146	0.150983	0.133342	0.160873		1146	0.145164	0.168118	0.153314
1147	0.1497	0.132064	0.162635		1147	0.146598	0.170672	0.152882
1148	0.150111	0.133818	0.161975		1148	0.144578	0.170951	0.155721
1149	0.148651	0.133653	0.16135		1149	0.145047	0.171716	0.153568
1150	0.14697	0.132958	0.160364		1150	0.145839	0.172096	0.152818
1151	0.147024	0.131001	0.157557		1151	0.146966	0.172624	0.1542
1152	0.148087	0.131273	0.1558		1152	0.145972	0.170742	0.154608
1153	0.14729	0.12852	0.157771		1153	0.144164	0.171611	0.152588
1154	0.145627	0.128713	0.157534		1154	0.143697	0.169589	0.151965
1155	0.146677	0.127383	0.156852		1155	0.143352	0.167599	0.151416
1156	0.146604	0.129896	0.15892		1156	0.143923	0.16644	0.151754
1157	0.143739	0.128154	0.159517		1157	0.144355	0.165646	0.151246
1158	0.14527	0.129445	0.159022		1158	0.145817	0.164542	0.153175
1159	0.146978	0.128994	0.161223		1159	0.145986	0.16513	0.154874
1160	0.147501	0.129421	0.161169		1160	0.1453	0.166576	0.156122
1161	0.146492	0.127476	0.161052		1161	0.144836	0.167037	0.155118
1162	0.149622	0.128477	0.161029		1162	0.144589	0.168163	0.156737
1163	0.147974	0.128612	0.161031		1163	0.145415	0.167626	0.156081
1164	0.146342	0.128248	0.159141		1164	0.145158	0.166069	0.156102
1165	0.145456	0.128403	0.160257		1165	0.146468	0.166066	0.154937
1166	0.147651	0.129218	0.161025		1166	0.145308	0.164812	0.154716
1167	0.145592	0.127689	0.160536		1167	0.14528	0.165367	0.153198
1168	0.145422	0.125849	0.160017		1168	0.145301	0.167858	0.152842
1169	0.146643	0.127829	0.158628		1169	0.145526	0.169711	0.151813
1170	0.145991	0.126907	0.157673		1170	0.144931	0.169591	0.15111
1171	0.146588	0.125371	0.156513		1171	0.144927	0.17198	0.152684
1172	0.147085	0.126426	0.156671		1172	0.147738	0.176122	0.153968
1173	0.150075	0.1263	0.156668		1173	0.148873	0.172762	0.154659
1174	0.150304	0.126461	0.158638		1174	0.148689	0.174741	0.155089
1175	0.153238	0.128083	0.159727		1175	0.148454	0.176639	0.153776
1176	0.152255	0.128072	0.159834		1176	0.149549	0.173812	0.151691
1177	0.152145	0.128237	0.15946		1177	0.147633	0.167722	0.151614
1178	0.149382	0.128918	0.1593		1178	0.146027	0.167305	0.14886
1179	0.151274	0.126984	0.157366		1179	0.144796	0.16571	0.148345
1180	0.149429	0.127352	0.155803		1180	0.144162	0.164732	0.148608
1181	0.147172	0.129841	0.154328		1181	0.142011	0.167229	0.149212
1182	0.148419	0.128485	0.154329		1182	0.143044	0.16942	0.147228
1183	0.148318	0.13027	0.153448		1183	0.142557	0.173342	0.14868
1184	0.146075	0.131649	0.155356		1184	0.144746	0.173328	0.150028
1185	0.146209	0.129062	0.155843		1185	0.144753	0.171517	0.149494
1186	0.148194	0.12721	0.158286		1186	0.146902	0.170125	0.149439
1187	0.147973	0.127404	0.15981		1187	0.145938	0.170614	0.149136
1188	0.148779	0.124744	0.158526		1188	0.145883	0.167011	0.150115
1189	0.149736	0.124442	0.15721		1189	0.144137	0.165561	0.149541
1190	0.148289	0.125605	0.157722		1190	0.14432	0.168365	0.150814
1191	0.148204	0.127159	0.157191		1191	0.143895	0.168001	0.151585
1192	0.148801	0.127772	0.156793		1192	0.143451	0.165207	0.154138
1193	0.148198	0.128669	0.158821		1193	0.143911	0.166755	0.153283
1194	0.148203	0.130581	0.16074		1194	0.145044	0.165703	0.154404
1195	0.14857	0.131748	0.161613		1195	0.144986	0.165648	0.152167
1196	0.146715	0.130269	0.160374		1196	0.143909	0.165469	0.153179
1197	0.148745	0.132183	0.15877		1197	0.143142	0.166259	0.153221
1198	0.148923	0.131385	0.156915		1198	0.144226	0.166222	0.152967
1199	0.148939	0.12996	0.15542		1199	0.143534	0.168093	0.152331
1200	0.151277	0.129289	0.153985		1200	0.143519	0.166486	0.154501
1201	0.149709	0.128311	0.154163		1201	0.144024	0.16725	0.154785
1202	0.147846	0.126165	0.154895		1202	0.146558	0.168801	0.154096
1203	0.148848	0.127916	0.156485		1203	0.1468	0.168278	0.152474
1204	0.150509	0.125396	0.157515		1204	0.146382	0.166448	0.152315
1205	0.148285	0.125259	0.15661		1205	0.146665	0.165836	0.150208
1206	0.151521	0.126756	0.158922		1206	0.147344	0.167393	0.150971
1207	0.150611	0.126664	0.158792		1207	0.145506	0.16558	0.149956
1208	0.14835	0.124607	0.15886		1208	0.145298	0.165665	0.151602
1209	0.14511	0.125139	0.157753		1209	0.14617	0.167756	0.151301
1210	0.145462	0.126188	0.159901		1210	0.14608	0.169182	0.153691
1211	0.144728	0.124821	0.156875		1211	0.146102	0.164886	0.149475
1212	0.144896	0.125825	0.157627		1212	0.146182	0.165411	0.150547
1213	0.145121	0.12699	0.157726		1213	0.146843	0.164676	0.15019
1214	0.145901	0.1271	0.158463		1214	0.147511	0.163923	0.149721
1215	0.14648	0.126492	0.157598		1215	0.147306	0.162876	0.151532
1216	0.146518	0.12807	0.157012		1216	0.147847	0.163344	0.154407
1217	0.144741	0.12913	0.156943		1217	0.146639	0.16256	0.15345
1218	0.145598	0.127887	0.155732		1218	0.145982	0.16539	0.153712
1219	0.147546	0.128656	0.156592		1219	0.145087	0.164769	0.15391
1220	0.146611	0.129324	0.156565		1220	0.144835	0.162412	0.151686

## Sheet: graph
Figure 3-figure supplement 2A
LPA-responded cells (%)							LPA-induced response (ΔF340/F380)
LPA							LPA
1 mM		3 mM		10 mM			1 mM		3 mM		10 mM
Vehicle	300 nM CNP	Vehicle	300 nM CNP	Vehicle	300 nM CNP		Vehicle	300 nM CNP	Vehicle	300 nM CNP	Vehicle	300 nM CNP
6.66667	0	23.3333	16.6667	20	36.6667		0.0515894		0.0826111	0.102842	0.0794455	0.10282
3.33333	20	10	23.3333	30	46.6667		0.107247	0.0583521	0.0793135	0.0665065	0.128643	0.121728
13.3333	20	33.3333	26.6667	53.3333	53.3333		0.0565035	0.0596197	0.0683407	0.0793408	0.138158	0.131575
