# Supplementary material for: C-type natriuretic peptide facilitates autonomic Ca2+ entry in growth plate chondrocytes for stimulating bone growth
Source: eLife. 2022 Mar 15;11:e71931. doi: 10.7554/eLife.71931 (PMC8923661; doi:10.7554/eLife.71931)
Supplement: Figure 3—figure supplement 2—source data 2. [file elife-71931-fig3-figsupp2-data2.xlsx]

## Sheet: trace
Figure 3-figure supplement 2B
Thapsigargin (5 mM)
Vehicle					CNP (300 nM)
Times (s)	Cell1	Cell2	Cell3		Times (s)	Cell1	Cell2	Cell3
0	0.187252	0.190294	0.203247		0	0.249087	0.232631	0.221051
1	0.188608	0.190863	0.20327		1	0.247369	0.235441	0.224519
2	0.188426	0.19126	0.204114		2	0.246928	0.236811	0.22279
3	0.186652	0.191776	0.203241		3	0.245644	0.236501	0.220865
4	0.188397	0.191128	0.204423		4	0.246102	0.237534	0.219762
5	0.189423	0.191559	0.20638		5	0.246062	0.240147	0.221605
6	0.188429	0.190732	0.204688		6	0.249287	0.238874	0.217203
7	0.189317	0.189494	0.205577		7	0.249777	0.237189	0.216058
8	0.191482	0.189895	0.207099		8	0.25205	0.240579	0.215701
9	0.192997	0.192967	0.209868		9	0.250645	0.240162	0.214713
10	0.192514	0.195092	0.210631		10	0.250032	0.239436	0.211263
11	0.194952	0.197921	0.215804		11	0.249089	0.2406	0.213787
12	0.197858	0.198648	0.217639		12	0.246095	0.242495	0.216712
13	0.199803	0.196644	0.219083		13	0.243222	0.239548	0.218004
14	0.201645	0.194517	0.216913		14	0.240152	0.240401	0.218115
15	0.205643	0.190881	0.218443		15	0.239104	0.239676	0.222475
16	0.208094	0.186729	0.216629		16	0.234493	0.238405	0.22169
17	0.208964	0.185699	0.215744		17	0.235268	0.237778	0.222408
18	0.210406	0.185289	0.215763		18	0.235379	0.237461	0.223518
19	0.212638	0.183977	0.216154		19	0.236637	0.238687	0.224899
20	0.21286	0.183224	0.213999		20	0.236327	0.240649	0.223417
21	0.213623	0.184331	0.214236		21	0.238159	0.245258	0.222116
22	0.214513	0.18451	0.213445		22	0.237087	0.249507	0.218161
23	0.216284	0.183558	0.210956		23	0.237677	0.253049	0.214746
24	0.218708	0.183033	0.208863		24	0.236975	0.252328	0.214818
25	0.219978	0.184028	0.207942		25	0.236774	0.253088	0.217821
26	0.220149	0.183592	0.205723		26	0.236623	0.252683	0.218107
27	0.221138	0.183197	0.204304		27	0.238676	0.247886	0.220237
28	0.219005	0.184083	0.205334		28	0.236863	0.250919	0.222248
29	0.215908	0.183902	0.204923		29	0.237778	0.256417	0.220478
30	0.215327	0.183706	0.205084		30	0.237333	0.257845	0.217101
31	0.212014	0.181632	0.20421		31	0.235673	0.261076	0.218629
32	0.207435	0.180345	0.202319		32	0.236445	0.268144	0.217978
33	0.207365	0.181106	0.201683		33	0.239725	0.267068	0.216137
34	0.205602	0.181703	0.200037		34	0.241014	0.266912	0.218018
35	0.20268	0.181525	0.198986		35	0.241506	0.272747	0.222039
36	0.203766	0.182712	0.198595		36	0.241844	0.27025	0.220333
37	0.20557	0.184485	0.200242		37	0.241418	0.272906	0.223349
38	0.205412	0.184481	0.197258		38	0.239543	0.275807	0.226876
39	0.205041	0.184161	0.19899		39	0.238552	0.277558	0.226797
40	0.205964	0.184498	0.196623		40	0.239461	0.277347	0.226777
41	0.203799	0.185066	0.196524		41	0.2412	0.281274	0.225977
42	0.20397	0.184134	0.196226		42	0.241837	0.278628	0.22245
43	0.202932	0.182882	0.197404		43	0.242401	0.276603	0.221453
44	0.205399	0.184337	0.195271		44	0.242092	0.279091	0.222778
45	0.205522	0.186344	0.196849		45	0.242551	0.278361	0.218706
46	0.207245	0.185506	0.196489		46	0.241703	0.279177	0.221356
47	0.206604	0.187403	0.194897		47	0.239258	0.278295	0.220973
48	0.206625	0.187871	0.194119		48	0.238648	0.283515	0.218108
49	0.204576	0.18981	0.195165		49	0.23703	0.283594	0.216896
50	0.20407	0.189375	0.195485		50	0.236741	0.279283	0.215537
51	0.20298	0.192784	0.196012		51	0.238411	0.277899	0.213543
52	0.203584	0.196331	0.197901		52	0.23876	0.279055	0.213525
53	0.20363	0.200614	0.198377		53	0.239886	0.276997	0.21455
54	0.20393	0.20261	0.198401		54	0.240544	0.275321	0.213081
55	0.203907	0.208032	0.196803		55	0.240735	0.279735	0.212778
56	0.206083	0.212504	0.197026		56	0.240402	0.282066	0.210851
57	0.20546	0.215413	0.196068		57	0.238781	0.285425	0.210107
58	0.204572	0.217903	0.195226		58	0.239499	0.284384	0.21039
59	0.203776	0.221202	0.194074		59	0.241539	0.284499	0.208377
60	0.203319	0.222688	0.195393		60	0.240955	0.284093	0.20789
61	0.201882	0.223598	0.194322		61	0.239122	0.286337	0.20902
62	0.20226	0.22321	0.194503		62	0.242091	0.28861	0.209747
63	0.201694	0.222935	0.195802		63	0.241175	0.292996	0.207173
64	0.200031	0.221252	0.195768		64	0.240067	0.292114	0.208726
65	0.197843	0.218222	0.195572		65	0.239949	0.292122	0.208183
66	0.196868	0.216126	0.198826		66	0.242407	0.286376	0.207268
67	0.194176	0.213133	0.200415		67	0.243617	0.282643	0.206355
68	0.192448	0.211836	0.199349		68	0.243498	0.281323	0.20621
69	0.190841	0.209311	0.201452		69	0.2439	0.278447	0.205823
70	0.190992	0.208078	0.202191		70	0.243311	0.275257	0.205051
71	0.189419	0.206321	0.199497		71	0.242244	0.276936	0.20405
72	0.188785	0.205471	0.198014		72	0.239455	0.280865	0.202765
73	0.188173	0.205148	0.199621		73	0.239759	0.281738	0.203014
74	0.187846	0.204026	0.201029		74	0.237996	0.286978	0.200138
75	0.188113	0.204706	0.202986		75	0.237314	0.289842	0.199103
76	0.187553	0.204651	0.205967		76	0.236774	0.290315	0.195155
77	0.187012	0.204638	0.206408		77	0.237369	0.285713	0.192257
78	0.186264	0.202896	0.205165		78	0.234193	0.287147	0.188505
79	0.188741	0.203047	0.204455		79	0.234573	0.287261	0.185739
80	0.188228	0.199032	0.202907		80	0.23439	0.285388	0.186583
81	0.188693	0.198278	0.202254		81	0.234232	0.287468	0.187792
82	0.191274	0.197158	0.202263		82	0.233322	0.287373	0.187508
83	0.192888	0.196094	0.205214		83	0.235536	0.288882	0.188271
84	0.193411	0.196136	0.206709		84	0.234927	0.295463	0.18983
85	0.195669	0.195779	0.207723		85	0.234199	0.302079	0.188232
86	0.197372	0.194719	0.208286		86	0.234184	0.305838	0.189703
87	0.198422	0.192676	0.210685		87	0.236878	0.306882	0.194564
88	0.199372	0.192612	0.21234		88	0.237636	0.309344	0.196268
89	0.19799	0.191497	0.210667		89	0.239703	0.306673	0.197785
90	0.19853	0.194424	0.211945		90	0.243819	0.307784	0.199657
91	0.199157	0.193708	0.21396		91	0.244325	0.30562	0.200953
92	0.198147	0.194409	0.212474		92	0.242466	0.308925	0.198703
93	0.200719	0.193292	0.21085		93	0.241466	0.305681	0.199219
94	0.201953	0.192021	0.213036		94	0.240615	0.306518	0.199329
95	0.203374	0.190088	0.212354		95	0.238501	0.305536	0.200412
96	0.202321	0.189079	0.209994		96	0.237759	0.306217	0.202921
97	0.202969	0.189131	0.211483		97	0.237698	0.303048	0.206077
98	0.200739	0.188616	0.211043		98	0.239051	0.302953	0.20797
99	0.203565	0.188935	0.213203		99	0.240518	0.297098	0.211849
100	0.20133	0.187748	0.212609		100	0.242738	0.293666	0.212482
101	0.203225	0.188268	0.212954		101	0.243274	0.288478	0.211035
102	0.202305	0.187604	0.211379		102	0.245995	0.287144	0.212237
103	0.204966	0.18793	0.211533		103	0.246425	0.280665	0.211988
104	0.204781	0.187126	0.21027		104	0.246155	0.279973	0.215524
105	0.206075	0.18539	0.209761		105	0.247021	0.277673	0.218699
106	0.204885	0.185593	0.20885		106	0.248689	0.275929	0.224469
107	0.206276	0.185892	0.208173		107	0.24776	0.274083	0.224995
108	0.204903	0.184246	0.207945		108	0.24758	0.273174	0.227216
109	0.20506	0.184142	0.206711		109	0.24718	0.267212	0.224381
110	0.205504	0.185527	0.205911		110	0.246773	0.263623	0.22333
111	0.207055	0.183906	0.206704		111	0.246707	0.265005	0.219387
112	0.206881	0.182884	0.20846		112	0.245327	0.264864	0.218998
113	0.207974	0.182135	0.208164		113	0.245744	0.26134	0.223302
114	0.207154	0.182567	0.207288		114	0.249256	0.262738	0.22381
115	0.206881	0.182169	0.209263		115	0.248931	0.264578	0.223779
116	0.205951	0.181904	0.209746		116	0.251142	0.262121	0.224542
117	0.205161	0.180823	0.209503		117	0.252462	0.258765	0.225234
118	0.204347	0.182797	0.211735		118	0.253772	0.258736	0.223545
119	0.205315	0.181237	0.213175		119	0.252855	0.253276	0.225461
120	0.205237	0.183014	0.213578		120	0.251929	0.249093	0.227649
121	0.207823	0.184601	0.212186		121	0.250177	0.247445	0.224952
122	0.211362	0.185615	0.210921		122	0.249628	0.24995	0.224854
123	0.211091	0.185466	0.208692		123	0.253387	0.252905	0.224291
124	0.209474	0.186955	0.206289		124	0.253147	0.255822	0.218567
125	0.207918	0.186291	0.205225		125	0.25699	0.257973	0.216676
126	0.206792	0.186101	0.20503		126	0.261195	0.258996	0.220803
127	0.20566	0.18597	0.203817		127	0.265069	0.254262	0.21787
128	0.205515	0.186342	0.202444		128	0.260759	0.253753	0.214489
129	0.203541	0.185174	0.202932		129	0.263177	0.256649	0.215692
130	0.204462	0.182671	0.206105		130	0.261935	0.256872	0.218122
131	0.203896	0.182192	0.208014		131	0.26037	0.2544	0.218909
132	0.20113	0.181155	0.211968		132	0.261176	0.25761	0.222502
133	0.200579	0.179014	0.215178		133	0.260699	0.25884	0.224742
134	0.20185	0.179101	0.215409		134	0.259251	0.257617	0.227061
135	0.200634	0.179636	0.214965		135	0.258325	0.261011	0.225069
136	0.198641	0.178957	0.213628		136	0.257349	0.263195	0.224974
137	0.198117	0.178054	0.213583		137	0.253843	0.264536	0.226125
138	0.196574	0.178038	0.213812		138	0.254339	0.262697	0.225689
139	0.196273	0.176837	0.215043		139	0.254699	0.264366	0.22824
140	0.194841	0.177391	0.215331		140	0.253158	0.263665	0.233159
141	0.195478	0.177269	0.215287		141	0.252937	0.264344	0.233452
142	0.195988	0.179886	0.214901		142	0.254362	0.263647	0.235577
143	0.196596	0.181133	0.214879		143	0.255624	0.266987	0.241298
144	0.1963	0.18271	0.214385		144	0.256762	0.268608	0.240754
145	0.197064	0.183035	0.211082		145	0.258647	0.266901	0.239531
146	0.19615	0.183512	0.213066		146	0.257701	0.268257	0.240799
147	0.197526	0.182735	0.210337		147	0.258428	0.269932	0.240989
148	0.196751	0.180686	0.208655		148	0.258293	0.269396	0.235463
149	0.196053	0.180261	0.209264		149	0.257606	0.270535	0.237231
150	0.196521	0.178517	0.211994		150	0.258648	0.272295	0.237735
151	0.196928	0.176454	0.209586		151	0.258799	0.274566	0.241055
152	0.194863	0.176926	0.211942		152	0.258372	0.279965	0.241807
153	0.195511	0.176108	0.21071		153	0.259333	0.283266	0.246245
154	0.196446	0.175059	0.210504		154	0.25596	0.284615	0.247199
155	0.196566	0.175922	0.209159		155	0.256126	0.287591	0.247731
156	0.196035	0.177273	0.210576		156	0.255425	0.288162	0.245492
157	0.193354	0.17598	0.208434		157	0.254883	0.287462	0.244902
158	0.192176	0.176795	0.210149		158	0.253863	0.286018	0.242729
159	0.189363	0.176515	0.21028		159	0.256486	0.287495	0.2447
160	0.188588	0.175855	0.211081		160	0.256178	0.284419	0.245021
161	0.188739	0.176046	0.213028		161	0.255161	0.282451	0.249593
162	0.191705	0.176031	0.215913		162	0.255763	0.278873	0.253636
163	0.193174	0.179716	0.216873		163	0.257092	0.27663	0.262043
164	0.195251	0.181913	0.217495		164	0.255401	0.272374	0.265582
165	0.196298	0.183192	0.216768		165	0.255272	0.273818	0.269124
166	0.196801	0.185852	0.217876		166	0.257362	0.274056	0.268679
167	0.195818	0.190177	0.217906		167	0.258412	0.272161	0.266101
168	0.195966	0.193379	0.21743		168	0.259257	0.273153	0.263445
169	0.195678	0.196499	0.221452		169	0.25997	0.274089	0.261421
170	0.196325	0.202113	0.221892		170	0.26096	0.274252	0.264969
171	0.197126	0.205486	0.219915		171	0.264463	0.272617	0.268949
172	0.198127	0.206471	0.220542		172	0.263231	0.276901	0.272809
173	0.200098	0.206362	0.219565		173	0.262576	0.277265	0.27761
174	0.1993	0.208681	0.213776		174	0.263154	0.279196	0.279266
175	0.198932	0.208354	0.212123		175	0.26127	0.282871	0.279576
176	0.197953	0.207205	0.2088		176	0.257667	0.285	0.280161
177	0.198708	0.208333	0.205222		177	0.259713	0.281339	0.286631
178	0.196501	0.208931	0.203929		178	0.259174	0.285207	0.287739
179	0.197664	0.207025	0.200752		179	0.256394	0.285544	0.29588
180	0.196946	0.206704	0.198817		180	0.256554	0.282171	0.297804
181	0.198701	0.205249	0.199693		181	0.257032	0.281434	0.295041
182	0.197193	0.203301	0.197374		182	0.254929	0.281377	0.290101
183	0.197768	0.200787	0.197186		183	0.254692	0.276802	0.289317
184	0.200018	0.200693	0.196863		184	0.257115	0.275621	0.281575
185	0.199345	0.198179	0.197458		185	0.254332	0.274512	0.278371
186	0.199345	0.197285	0.195632		186	0.255197	0.274525	0.280245
187	0.200082	0.196801	0.195301		187	0.253542	0.276654	0.278413
188	0.199562	0.195594	0.193737		188	0.251864	0.275249	0.275274
189	0.196425	0.194625	0.194273		189	0.250786	0.273389	0.277041
190	0.197261	0.194931	0.190953		190	0.252363	0.272746	0.280684
191	0.192548	0.194332	0.189129		191	0.251849	0.269691	0.280797
192	0.191318	0.194283	0.18931		192	0.252219	0.262608	0.286139
193	0.19078	0.195004	0.186413		193	0.252174	0.261285	0.289036
194	0.191749	0.195857	0.185269		194	0.256139	0.26128	0.290722
195	0.190577	0.197386	0.185527		195	0.255125	0.25881	0.290834
196	0.191663	0.200058	0.185468		196	0.255553	0.25819	0.291745
197	0.190093	0.202031	0.183823		197	0.26011	0.263508	0.288153
198	0.189425	0.203904	0.184139		198	0.262688	0.264479	0.289285
199	0.189386	0.20437	0.182439		199	0.260754	0.260666	0.286086
200	0.190462	0.203119	0.182219		200	0.265503	0.260035	0.282058
201	0.190269	0.203223	0.181465		201	0.266129	0.263651	0.276986
202	0.190953	0.202431	0.181464		202	0.266313	0.262698	0.276579
203	0.191603	0.203174	0.181333		203	0.266691	0.261098	0.273929
204	0.189283	0.203825	0.182871		204	0.266708	0.261187	0.270684
205	0.187842	0.206272	0.18035		205	0.271086	0.266475	0.271375
206	0.187229	0.208122	0.17942		206	0.274322	0.265127	0.275536
207	0.185698	0.209303	0.177743		207	0.272176	0.263656	0.273554
208	0.182924	0.211158	0.176368		208	0.273005	0.266225	0.269138
209	0.180935	0.212479	0.176244		209	0.272994	0.268878	0.266888
210	0.179058	0.214303	0.177109		210	0.269512	0.263648	0.263937
211	0.177979	0.212117	0.176865		211	0.268519	0.263154	0.25872
212	0.177863	0.210936	0.177427		212	0.272444	0.264829	0.259024
213	0.1781	0.209094	0.178198		213	0.27293	0.264196	0.258386
214	0.178906	0.210186	0.175778		214	0.277306	0.263954	0.263032
215	0.180036	0.209886	0.176349		215	0.278801	0.262177	0.258548
216	0.180843	0.211494	0.17683		216	0.281744	0.259797	0.257308
217	0.182527	0.215066	0.177533		217	0.282998	0.256036	0.255468
218	0.180212	0.216599	0.176872		218	0.287912	0.252007	0.25959
219	0.179963	0.214682	0.178931		219	0.291717	0.252462	0.254044
220	0.17835	0.211536	0.177445		220	0.2934	0.252625	0.254903
221	0.178021	0.211703	0.176622		221	0.293782	0.252143	0.257356
222	0.177013	0.21043	0.175351		222	0.294476	0.251229	0.255408
223	0.178722	0.209144	0.177633		223	0.292372	0.249184	0.254319
224	0.179388	0.209499	0.177044		224	0.292231	0.249137	0.255559
225	0.179808	0.214091	0.178052		225	0.291974	0.245385	0.257112
226	0.17898	0.215691	0.177821		226	0.294611	0.241897	0.256563
227	0.178057	0.217325	0.17883		227	0.294961	0.244996	0.254918
228	0.176681	0.220769	0.177731		228	0.298278	0.242426	0.248882
229	0.175078	0.224237	0.177325		229	0.299342	0.236925	0.244902
230	0.174712	0.224325	0.176684		230	0.303923	0.236862	0.242286
231	0.174379	0.225381	0.177546		231	0.304627	0.237406	0.240283
232	0.173102	0.227677	0.177207		232	0.306168	0.233388	0.241122
233	0.172024	0.22849	0.177376		233	0.306906	0.236175	0.2438
234	0.171903	0.227189	0.177046		234	0.305633	0.236687	0.245578
235	0.171589	0.228282	0.180365		235	0.306135	0.24408	0.246997
236	0.171702	0.229612	0.182114		236	0.306699	0.242326	0.245143
237	0.173787	0.226799	0.183235		237	0.307747	0.239852	0.245464
238	0.176654	0.22614	0.185034		238	0.312618	0.242239	0.24492
239	0.177844	0.226993	0.187359		239	0.318166	0.241725	0.243927
240	0.178578	0.225957	0.187654		240	0.318022	0.23557	0.241812
241	0.179097	0.224942	0.188853		241	0.320133	0.238497	0.242959
242	0.17792	0.223968	0.190798		242	0.322151	0.241295	0.242263
243	0.178354	0.222619	0.19237		243	0.320031	0.240758	0.241514
244	0.179004	0.222078	0.195213		244	0.322347	0.238599	0.241008
245	0.179577	0.220219	0.195738		245	0.321816	0.237886	0.239642
246	0.180863	0.219536	0.196417		246	0.319815	0.237554	0.236604
247	0.180746	0.223162	0.195171		247	0.317821	0.236106	0.229344
248	0.179523	0.221888	0.195063		248	0.316856	0.23501	0.224743
249	0.178137	0.220109	0.191312		249	0.311688	0.237657	0.223419
250	0.178342	0.22044	0.190694		250	0.316391	0.239949	0.22288
251	0.177143	0.222273	0.190443		251	0.316944	0.24244	0.219866
252	0.178906	0.218677	0.189816		252	0.319684	0.24372	0.225913
253	0.180671	0.220898	0.187603		253	0.31762	0.241886	0.229633
254	0.182687	0.220821	0.188381		254	0.317257	0.238714	0.230119
255	0.182524	0.221541	0.186612		255	0.311968	0.238018	0.233738
256	0.182719	0.218566	0.184773		256	0.312183	0.236536	0.236419
257	0.18263	0.220766	0.184191		257	0.308516	0.239034	0.233783
258	0.182931	0.219483	0.183596		258	0.308621	0.242094	0.231772
259	0.182264	0.220171	0.182956		259	0.306242	0.24586	0.235273
260	0.181929	0.221838	0.182867		260	0.304712	0.245564	0.234205
261	0.182835	0.221217	0.183175		261	0.302481	0.248411	0.235912
262	0.182374	0.219806	0.182843		262	0.301724	0.245517	0.238733
263	0.181026	0.219635	0.181983		263	0.302088	0.247557	0.238037
264	0.17946	0.218992	0.181456		264	0.300818	0.248864	0.23606
265	0.179099	0.216079	0.181056		265	0.301602	0.249956	0.238264
266	0.178683	0.217116	0.178753		266	0.30051	0.247778	0.241864
267	0.179289	0.217678	0.178447		267	0.301616	0.250899	0.246867
268	0.180796	0.216723	0.177813		268	0.300119	0.247025	0.250551
269	0.184983	0.216127	0.175596		269	0.301937	0.24655	0.246952
270	0.187773	0.214442	0.175699		270	0.298784	0.247709	0.244853
271	0.190954	0.213395	0.177612		271	0.295194	0.24419	0.242969
272	0.193018	0.209636	0.178494		272	0.29388	0.241083	0.241007
273	0.194246	0.209045	0.179885		273	0.293049	0.24468	0.240311
274	0.194802	0.208981	0.181932		274	0.291145	0.245848	0.246759
275	0.196314	0.206189	0.185375		275	0.29348	0.245782	0.24771
276	0.195919	0.205194	0.187127		276	0.296162	0.250384	0.245804
277	0.195528	0.205643	0.187362		277	0.295856	0.251541	0.242765
278	0.196449	0.204109	0.191072		278	0.292317	0.249326	0.244989
279	0.195235	0.202552	0.192789		279	0.290476	0.248181	0.241237
280	0.194224	0.203974	0.191522		280	0.288796	0.246942	0.238417
281	0.19461	0.201654	0.19022		281	0.287683	0.245362	0.237056
282	0.19681	0.200801	0.191767		282	0.284813	0.245539	0.235753
283	0.196466	0.199413	0.190102		283	0.285916	0.24715	0.233813
284	0.198183	0.197241	0.191406		284	0.286046	0.246123	0.233036
285	0.199554	0.195738	0.190884		285	0.285166	0.248365	0.232016
286	0.200749	0.193879	0.193562		286	0.284272	0.252473	0.231822
287	0.199102	0.190623	0.195581		287	0.285913	0.255435	0.231874
288	0.198554	0.189713	0.196262		288	0.286295	0.255192	0.229063
289	0.197727	0.188281	0.196751		289	0.286684	0.260043	0.231441
290	0.19736	0.187824	0.198946		290	0.28757	0.258007	0.232494
291	0.197014	0.186866	0.199355		291	0.287809	0.258429	0.23341
292	0.198746	0.188068	0.199152		292	0.286883	0.258532	0.2306
293	0.201054	0.186908	0.199495		293	0.286219	0.260516	0.232963
294	0.204414	0.186998	0.199851		294	0.287642	0.257854	0.232924
295	0.205484	0.186592	0.201601		295	0.287519	0.259825	0.230146
296	0.205223	0.186444	0.202517		296	0.288968	0.255608	0.228928
297	0.207001	0.186777	0.205455		297	0.286959	0.254198	0.233054
298	0.208755	0.186719	0.207709		298	0.289262	0.254164	0.232626
299	0.206495	0.187911	0.211604		299	0.289525	0.257127	0.235417
300	0.207827	0.190067	0.211811		300	0.29051	0.2561	0.237369
301	0.210211	0.194437	0.212658		301	0.292006	0.259701	0.239482
302	0.209061	0.194554	0.212362		302	0.295523	0.260977	0.237451
303	0.207172	0.197204	0.213406		303	0.294064	0.259495	0.238589
304	0.207168	0.198039	0.212538		304	0.291764	0.257746	0.240613
305	0.205192	0.200058	0.213545		305	0.290012	0.260727	0.245902
306	0.203405	0.199532	0.214704		306	0.287874	0.259364	0.247171
307	0.203245	0.200774	0.21573		307	0.286785	0.259524	0.247755
308	0.202513	0.202718	0.215771		308	0.288572	0.259819	0.246641
309	0.20136	0.204088	0.215955		309	0.291485	0.261305	0.240411
310	0.199346	0.202704	0.21477		310	0.291963	0.260353	0.237333
311	0.198297	0.202655	0.214509		311	0.291164	0.258563	0.232664
312	0.196401	0.203149	0.21646		312	0.294491	0.258198	0.232183
313	0.195693	0.201382	0.217409		313	0.295121	0.259128	0.228265
314	0.196289	0.200648	0.220028		314	0.292519	0.257284	0.226414
315	0.196702	0.19974	0.224952		315	0.293841	0.255645	0.223049
316	0.197222	0.197745	0.227282		316	0.295952	0.259029	0.220089
317	0.198205	0.195938	0.22531		317	0.294087	0.256774	0.221547
318	0.197957	0.19605	0.229971		318	0.294376	0.25609	0.223578
319	0.198208	0.196084	0.229041		319	0.294951	0.252974	0.225253
320	0.202066	0.194867	0.228808		320	0.296499	0.252119	0.224891
321	0.201321	0.194954	0.228855		321	0.29744	0.245061	0.229146
322	0.202934	0.194497	0.232109		322	0.2965	0.24464	0.224604
323	0.202662	0.191844	0.23079		323	0.297757	0.242405	0.221842
324	0.201844	0.189013	0.232681		324	0.29925	0.241107	0.218804
325	0.201625	0.189515	0.232301		325	0.300189	0.239458	0.216056
326	0.202646	0.189245	0.234269		326	0.300318	0.239828	0.214698
327	0.20084	0.188783	0.234418		327	0.302938	0.242432	0.213751
328	0.203773	0.189664	0.236292		328	0.303024	0.241126	0.212954
329	0.203611	0.19003	0.237004		329	0.302634	0.242399	0.213806
330	0.201884	0.189367	0.23378		330	0.302325	0.243356	0.212318
331	0.203195	0.188612	0.230217		331	0.303202	0.243848	0.209799
332	0.203322	0.188294	0.226159		332	0.302122	0.2459	0.209212
333	0.204286	0.187916	0.222014		333	0.302693	0.249416	0.211998
334	0.206063	0.189174	0.218626		334	0.304194	0.250047	0.209894
335	0.206281	0.188112	0.220089		335	0.303728	0.25194	0.211401
336	0.207591	0.188279	0.223141		336	0.302359	0.255965	0.209834
337	0.211099	0.188912	0.224302		337	0.302825	0.250272	0.208182
338	0.212413	0.188215	0.222814		338	0.301015	0.249626	0.200714
339	0.214092	0.188403	0.221534		339	0.301103	0.248762	0.200918
340	0.217346	0.1909	0.223991		340	0.301581	0.245618	0.199615
341	0.219336	0.191625	0.222835		341	0.303328	0.242355	0.197574
342	0.220533	0.19216	0.224618		342	0.303763	0.245299	0.198565
343	0.219409	0.195403	0.225045		343	0.306293	0.245044	0.198903
344	0.221961	0.19623	0.227505		344	0.307586	0.244911	0.197913
345	0.22153	0.196413	0.226686		345	0.309896	0.244867	0.196428
346	0.221997	0.197242	0.226106		346	0.310374	0.247918	0.19752
347	0.22342	0.197548	0.226716		347	0.30875	0.24855	0.196246
348	0.225212	0.197346	0.230532		348	0.305395	0.246708	0.198433
349	0.226389	0.196115	0.229307		349	0.302967	0.248026	0.196695
350	0.228009	0.194475	0.230375		350	0.298821	0.251591	0.199238
351	0.22878	0.193442	0.234066		351	0.29786	0.251878	0.199094
352	0.228104	0.191963	0.232634		352	0.302196	0.251547	0.198962
353	0.228428	0.188561	0.229522		353	0.304453	0.253316	0.199019
354	0.228984	0.186091	0.232832		354	0.307444	0.254928	0.198724
355	0.228447	0.184815	0.233153		355	0.308159	0.257261	0.19822
356	0.226653	0.184286	0.23266		356	0.308339	0.259838	0.199156
357	0.225075	0.183004	0.230416		357	0.306142	0.258841	0.201849
358	0.226592	0.182613	0.230336		358	0.305766	0.259231	0.203876
359	0.225919	0.18319	0.22879		359	0.304002	0.257221	0.205943
360	0.226543	0.182884	0.228185		360	0.304645	0.253304	0.206046
361	0.22922	0.182498	0.225498		361	0.298637	0.248251	0.208534
362	0.232586	0.181712	0.227507		362	0.297134	0.245492	0.209457
363	0.234416	0.180636	0.230386		363	0.293568	0.240651	0.207552
364	0.234894	0.179183	0.230348		364	0.293221	0.238058	0.207958
365	0.236017	0.178242	0.230089		365	0.289512	0.235332	0.209686
366	0.237228	0.17609	0.229986		366	0.29278	0.234344	0.207625
367	0.239051	0.176352	0.228974		367	0.290828	0.234274	0.208421
368	0.238613	0.177982	0.225567		368	0.291156	0.235096	0.21052
369	0.242461	0.178603	0.22523		369	0.28702	0.234475	0.211782
370	0.24334	0.180464	0.223542		370	0.286077	0.234773	0.212695
371	0.242595	0.181665	0.222743		371	0.282719	0.234336	0.216282
372	0.241598	0.1835	0.226513		372	0.279505	0.234392	0.214196
373	0.239908	0.183866	0.228499		373	0.275329	0.236185	0.215346
374	0.233863	0.187202	0.227857		374	0.27375	0.23903	0.218736
375	0.232767	0.189323	0.230533		375	0.272515	0.240383	0.218696
376	0.230204	0.19212	0.229587		376	0.273022	0.240119	0.220312
377	0.227478	0.194324	0.229864		377	0.272902	0.241293	0.219315
378	0.226146	0.197242	0.230022		378	0.271761	0.241302	0.220116
379	0.228718	0.197041	0.230163		379	0.271767	0.241128	0.221636
380	0.228458	0.197985	0.2269		380	0.26871	0.242062	0.222674
381	0.230279	0.199393	0.226099		381	0.266231	0.240589	0.220815
382	0.231093	0.199863	0.221566		382	0.263471	0.241315	0.226424
383	0.231691	0.19835	0.219204		383	0.262248	0.237646	0.226608
384	0.230386	0.199768	0.218509		384	0.260536	0.23698	0.22407
385	0.229874	0.199944	0.219382		385	0.262178	0.236216	0.225897
386	0.228562	0.202208	0.22182		386	0.259982	0.237546	0.225381
387	0.227094	0.201197	0.223697		387	0.261048	0.233419	0.224377
388	0.226399	0.202244	0.223934		388	0.261652	0.2356	0.224911
389	0.226338	0.20122	0.225251		389	0.259965	0.233696	0.223445
390	0.227305	0.202166	0.225872		390	0.258981	0.231223	0.223267
391	0.227019	0.199336	0.225658		391	0.2583	0.22883	0.224002
392	0.228247	0.199443	0.226031		392	0.256088	0.228777	0.22127
393	0.229952	0.198727	0.227881		393	0.253961	0.226321	0.221749
394	0.2283	0.19813	0.230801		394	0.253793	0.225888	0.220689
395	0.226768	0.193725	0.232339		395	0.251647	0.22468	0.219273
396	0.225129	0.193163	0.231148		396	0.251606	0.224721	0.215541
397	0.225104	0.192822	0.234193		397	0.25083	0.222696	0.212872
398	0.223981	0.192623	0.236089		398	0.251179	0.224404	0.211493
399	0.222752	0.193409	0.234168		399	0.248134	0.22316	0.211347
400	0.222695	0.194591	0.235739		400	0.249429	0.220742	0.212182
401	0.222689	0.192567	0.238765		401	0.248471	0.219319	0.214101
402	0.221256	0.19166	0.236682		402	0.248037	0.21998	0.216486
403	0.220534	0.191283	0.235927		403	0.248754	0.218077	0.213301
404	0.221444	0.189702	0.235485		404	0.249932	0.217325	0.211511
405	0.220398	0.188094	0.233602		405	0.249904	0.219081	0.209132
406	0.220148	0.188528	0.234286		406	0.252505	0.219894	0.209003
407	0.219294	0.186242	0.234286		407	0.253687	0.217939	0.208523
408	0.218095	0.184485	0.232443		408	0.25362	0.217515	0.209871
409	0.216685	0.183387	0.233105		409	0.255138	0.218754	0.211175
410	0.21514	0.18472	0.232934		410	0.253078	0.21965	0.212727
411	0.21477	0.183209	0.231162		411	0.252042	0.220253	0.213706
412	0.21365	0.183103	0.228564		412	0.252002	0.223377	0.213707
413	0.213847	0.183528	0.231412		413	0.251406	0.223431	0.216472
414	0.214949	0.183552	0.229853		414	0.249788	0.223272	0.219155
415	0.216274	0.180127	0.227959		415	0.250399	0.219967	0.21471
416	0.214903	0.180159	0.226361		416	0.248238	0.218643	0.216816
417	0.213168	0.181321	0.226508		417	0.247962	0.216741	0.216265
418	0.211659	0.179726	0.223558		418	0.248053	0.215899	0.210906
419	0.210366	0.178281	0.222394		419	0.248192	0.215884	0.204488
420	0.209615	0.179468	0.223185		420	0.24735	0.215729	0.207739
421	0.209651	0.177349	0.223012		421	0.247694	0.217485	0.205517
422	0.208247	0.175662	0.22174		422	0.245385	0.218388	0.204298
423	0.207199	0.176463	0.219685		423	0.243339	0.216617	0.203962
424	0.206966	0.175912	0.221481		424	0.243178	0.218825	0.206088
425	0.204942	0.176788	0.217787		425	0.241837	0.219056	0.20463
426	0.203748	0.179577	0.216946		426	0.240702	0.219415	0.204539
427	0.206806	0.180579	0.217845		427	0.242018	0.219527	0.202766
428	0.206782	0.179915	0.217942		428	0.242055	0.222751	0.20419
429	0.207501	0.182504	0.21503		429	0.240965	0.221568	0.204
430	0.210256	0.182039	0.21356		430	0.242326	0.224117	0.203189
431	0.212933	0.182085	0.212098		431	0.242627	0.218961	0.202678
432	0.211931	0.183566	0.209329		432	0.24093	0.219547	0.207568
433	0.211387	0.18549	0.209542		433	0.238946	0.217666	0.207342
434	0.208545	0.186161	0.208561		434	0.238059	0.213642	0.206997
435	0.20657	0.188045	0.209912		435	0.234721	0.213989	0.204121
436	0.206028	0.189173	0.209985		436	0.233094	0.215385	0.199778
437	0.204629	0.189234	0.211126		437	0.231777	0.212916	0.194511
438	0.204055	0.189773	0.208195		438	0.22902	0.213807	0.191998
439	0.207374	0.189934	0.209477		439	0.226432	0.217744	0.193365
440	0.207062	0.190341	0.206785		440	0.226503	0.215315	0.19237
441	0.205221	0.18989	0.20577		441	0.22449	0.216209	0.194327
442	0.20534	0.190715	0.203592		442	0.221608	0.218888	0.195589
443	0.205223	0.191944	0.203194		443	0.223945	0.218863	0.195801
444	0.202422	0.191764	0.199749		444	0.225425	0.221473	0.193381
445	0.200088	0.191964	0.20165		445	0.224653	0.223615	0.194092
446	0.200463	0.193853	0.201744		446	0.225189	0.225124	0.194056
447	0.201575	0.194353	0.200069		447	0.227301	0.225417	0.19561
448	0.201841	0.194479	0.198065		448	0.225202	0.225498	0.195919
449	0.200502	0.195687	0.195523		449	0.225749	0.221438	0.196417
450	0.201101	0.196285	0.193208		450	0.225541	0.224191	0.201239
451	0.199869	0.196216	0.190297		451	0.22625	0.227423	0.201178
452	0.197942	0.197212	0.189626		452	0.226845	0.231162	0.201297
453	0.197206	0.19701	0.190572		453	0.226159	0.232692	0.203012
454	0.196912	0.199668	0.191112		454	0.225644	0.235865	0.204065
455	0.196011	0.201535	0.191291		455	0.224706	0.23297	0.199857
456	0.195684	0.203104	0.190418		456	0.223507	0.232576	0.198581
457	0.19349	0.204751	0.190504		457	0.220305	0.229942	0.198955
458	0.192065	0.205081	0.189195		458	0.222109	0.231477	0.199963
459	0.192076	0.203489	0.188		459	0.220123	0.233086	0.19969
460	0.191983	0.204607	0.186425		460	0.218611	0.234628	0.201945
461	0.190988	0.204643	0.186674		461	0.218043	0.236406	0.205455
462	0.192422	0.204145	0.186193		462	0.219886	0.23974	0.203152
463	0.192825	0.205331	0.18783		463	0.220382	0.239664	0.20334
464	0.192608	0.20592	0.191415		464	0.223016	0.236886	0.204602
465	0.192971	0.20507	0.193746		465	0.224482	0.237515	0.204281
466	0.193944	0.205596	0.19631		466	0.225043	0.240492	0.20176
467	0.193812	0.204935	0.199025		467	0.225746	0.239085	0.203974
468	0.193281	0.205585	0.199941		468	0.224706	0.241026	0.199891
469	0.194683	0.206644	0.198325		469	0.222761	0.242921	0.19802
470	0.193548	0.206391	0.196016		470	0.224653	0.245729	0.19755
471	0.192675	0.208663	0.195424		471	0.224245	0.241146	0.196837
472	0.191567	0.211176	0.194876		472	0.223213	0.23875	0.195916
473	0.190211	0.212301	0.193535		473	0.222154	0.236493	0.201798
474	0.18788	0.211756	0.195481		474	0.224282	0.235971	0.204003
475	0.18701	0.212355	0.198714		475	0.223303	0.234115	0.202565
476	0.186345	0.210557	0.203556		476	0.223287	0.233994	0.203211
477	0.185749	0.211092	0.20457		477	0.223226	0.237147	0.202463
478	0.186499	0.210321	0.206789		478	0.223622	0.236844	0.19842
479	0.185377	0.208834	0.207469		479	0.222168	0.23585	0.199293
480	0.185156	0.209877	0.208535		480	0.223245	0.232082	0.197183
481	0.184806	0.209819	0.205658		481	0.224208	0.231505	0.195882
482	0.184727	0.21045	0.205888		482	0.22686	0.230764	0.195058
483	0.183183	0.21106	0.205688		483	0.229373	0.233002	0.193318
484	0.183103	0.211389	0.20739		484	0.229008	0.233769	0.192553
485	0.181846	0.209699	0.206948		485	0.229425	0.235206	0.193482
486	0.180445	0.209364	0.205554		486	0.231333	0.233474	0.194746
487	0.180507	0.20663	0.205939		487	0.231017	0.233224	0.196257
488	0.181498	0.204147	0.204718		488	0.230047	0.230397	0.19849
489	0.180547	0.204287	0.202174		489	0.231427	0.229126	0.193542
490	0.181781	0.203737	0.201312		490	0.229269	0.231623	0.194791
491	0.181836	0.200764	0.19967		491	0.227193	0.231992	0.191297
492	0.181569	0.199377	0.198307		492	0.22629	0.227275	0.191639
493	0.18062	0.197582	0.194675		493	0.227387	0.225105	0.192568
494	0.181756	0.195665	0.193366		494	0.226593	0.225265	0.195247
495	0.180727	0.195499	0.191151		495	0.228151	0.226156	0.192916
496	0.179095	0.195689	0.189586		496	0.228136	0.225102	0.195176
497	0.177628	0.195731	0.188336		497	0.227178	0.229339	0.193637
498	0.17772	0.196877	0.190909		498	0.225117	0.230247	0.192621
499	0.177423	0.197788	0.190306		499	0.223485	0.229784	0.191525
500	0.177961	0.198819	0.189241		500	0.22228	0.225414	0.195552
501	0.179375	0.2007	0.191408		501	0.220702	0.227086	0.197464
502	0.178383	0.200919	0.19062		502	0.219717	0.228541	0.196651
503	0.180332	0.202005	0.188771		503	0.219779	0.228155	0.196117
504	0.1798	0.204365	0.189001		504	0.21941	0.228414	0.194705
505	0.180263	0.203112	0.18925		505	0.21694	0.229446	0.193272
506	0.180206	0.203691	0.189147		506	0.216416	0.228884	0.192541
507	0.183578	0.204499	0.19011		507	0.216117	0.229312	0.192599
508	0.183264	0.202411	0.191077		508	0.214231	0.236603	0.19005
509	0.185296	0.200311	0.190094		509	0.214712	0.239843	0.190035
510	0.185968	0.199056	0.190156		510	0.216996	0.242156	0.188822
511	0.186579	0.197355	0.189772		511	0.22034	0.247851	0.186436
512	0.18728	0.196436	0.188573		512	0.221917	0.24669	0.186794
513	0.18711	0.198104	0.188706		513	0.225451	0.246568	0.186916
514	0.187429	0.197923	0.187681		514	0.227556	0.247914	0.187106
515	0.186178	0.198723	0.186866		515	0.227444	0.252548	0.188593
516	0.18659	0.198311	0.187703		516	0.225166	0.251267	0.189009
517	0.186155	0.198112	0.188165		517	0.224383	0.250794	0.187953
518	0.185922	0.197585	0.187715		518	0.222045	0.248498	0.189102
519	0.186653	0.196274	0.186718		519	0.220975	0.246802	0.188469
520	0.189332	0.198272	0.186843		520	0.221049	0.242637	0.187603
521	0.190172	0.199734	0.184311		521	0.221005	0.243271	0.187468
522	0.190731	0.200642	0.183721		522	0.219466	0.24075	0.186634
523	0.193109	0.199639	0.182265		523	0.218286	0.237721	0.185941
524	0.192202	0.200176	0.183186		524	0.215269	0.233805	0.186049
525	0.19317	0.19874	0.183909		525	0.213547	0.23142	0.184433
526	0.193065	0.197091	0.18416		526	0.211631	0.227614	0.1852
527	0.19305	0.193524	0.18254		527	0.210738	0.229225	0.18638
528	0.193207	0.194474	0.184709		528	0.211428	0.228003	0.186641
529	0.195293	0.194464	0.18451		529	0.211875	0.230798	0.187766
530	0.194743	0.194404	0.184882		530	0.212428	0.228259	0.190828
531	0.193878	0.19278	0.185094		531	0.212956	0.227622	0.191404
532	0.191975	0.192532	0.1854		532	0.211649	0.226675	0.191741
533	0.189467	0.191022	0.183806		533	0.210991	0.228913	0.193156
534	0.187056	0.188389	0.182756		534	0.211822	0.227549	0.193288
535	0.184454	0.184252	0.181018		535	0.212124	0.22967	0.19293
536	0.18472	0.183366	0.180769		536	0.211953	0.230259	0.189509
537	0.183668	0.182853	0.181272		537	0.214661	0.234325	0.190361
538	0.183408	0.180715	0.180548		538	0.213818	0.235646	0.190737
539	0.18299	0.182071	0.182326		539	0.213755	0.236201	0.190098
540	0.182235	0.181331	0.182474		540	0.210864	0.237225	0.189985
541	0.180206	0.18153	0.182804		541	0.209606	0.237992	0.193937
542	0.181041	0.180965	0.18256		542	0.208579	0.23758	0.196037
543	0.182056	0.179254	0.183663		543	0.208553	0.2394	0.195106
544	0.183894	0.176648	0.185105		544	0.206879	0.242086	0.19399
545	0.183592	0.177081	0.184963		545	0.209408	0.244237	0.192212
546	0.184968	0.17652	0.183273		546	0.208599	0.244553	0.19147
547	0.187196	0.175375	0.182811		547	0.207454	0.243315	0.189264
548	0.189221	0.17692	0.182372		548	0.206733	0.245186	0.189588
549	0.190311	0.176547	0.180053		549	0.207823	0.245784	0.190151
550	0.195264	0.175743	0.180543		550	0.206743	0.246495	0.190032
551	0.19869	0.173892	0.1818		551	0.207211	0.2506	0.190125
552	0.201489	0.174214	0.181577		552	0.208533	0.253297	0.190028
553	0.20395	0.173333	0.183509		553	0.209039	0.250757	0.189157
554	0.20626	0.174431	0.182518		554	0.207682	0.253232	0.189483
555	0.207656	0.174008	0.182102		555	0.207047	0.254006	0.192439
556	0.207909	0.173877	0.179262		556	0.206427	0.251792	0.189005
557	0.207846	0.173698	0.176594		557	0.204673	0.250404	0.190587
558	0.206296	0.173895	0.171921		558	0.204136	0.25574	0.191722
559	0.206592	0.173809	0.17298		559	0.203196	0.250096	0.194973
560	0.208061	0.175437	0.173231		560	0.201369	0.250527	0.192058
561	0.208748	0.175962	0.175652		561	0.203552	0.253762	0.197244
562	0.208444	0.177724	0.17895		562	0.20382	0.257814	0.195409
563	0.211552	0.178818	0.182159		563	0.20249	0.253993	0.196391
564	0.214496	0.179748	0.181093		564	0.203818	0.256062	0.19576
565	0.215259	0.180268	0.181258		565	0.20346	0.255736	0.195074
566	0.218278	0.181487	0.181933		566	0.202023	0.252178	0.192721
567	0.221938	0.179767	0.181737		567	0.201042	0.251713	0.195079
568	0.22382	0.180595	0.181449		568	0.201486	0.251489	0.195738
569	0.224786	0.180531	0.183879		569	0.197979	0.251335	0.196412
570	0.226391	0.180995	0.185151		570	0.196589	0.252189	0.196549
571	0.22663	0.181315	0.185908		571	0.19489	0.254244	0.196306
572	0.22795	0.183997	0.189152		572	0.193731	0.255207	0.194724
573	0.226657	0.183152	0.18997		573	0.190987	0.256035	0.191672
574	0.225905	0.182772	0.190051		574	0.192572	0.256139	0.188345
575	0.226055	0.18324	0.190012		575	0.192048	0.257593	0.187107
576	0.225816	0.183805	0.188171		576	0.191331	0.256753	0.187914
577	0.224541	0.182916	0.184812		577	0.190645	0.250822	0.188179
578	0.227729	0.184019	0.186257		578	0.192311	0.250661	0.189486
579	0.227612	0.18516	0.185865		579	0.190547	0.255411	0.192425
580	0.228957	0.184878	0.184493		580	0.190434	0.258004	0.195825
581	0.231298	0.184471	0.185347		581	0.190754	0.264263	0.193902
582	0.232981	0.184033	0.189372		582	0.190628	0.269257	0.191895
583	0.230607	0.1841	0.188343		583	0.189175	0.270427	0.191023
584	0.229958	0.185881	0.188724		584	0.191034	0.27281	0.185703
585	0.227775	0.183935	0.189331		585	0.190858	0.274176	0.18489
586	0.227615	0.184975	0.188915		586	0.190798	0.27121	0.184176
587	0.225016	0.186202	0.185937		587	0.192768	0.272888	0.183304
588	0.224994	0.185854	0.184965		588	0.193733	0.278347	0.180544
589	0.22366	0.183931	0.18555		589	0.193611	0.276574	0.18242
590	0.22309	0.185865	0.185833		590	0.195413	0.273617	0.179966
591	0.219823	0.185641	0.186662		591	0.195949	0.27382	0.180051
592	0.220431	0.184808	0.186826		592	0.195704	0.275666	0.179013
593	0.220325	0.184959	0.187766		593	0.196437	0.274611	0.184068
594	0.221539	0.184925	0.187044		594	0.196076	0.276358	0.183502
595	0.22035	0.184991	0.186327		595	0.197164	0.275678	0.187027
596	0.222155	0.18621	0.185478		596	0.197553	0.276253	0.188255
597	0.221247	0.186232	0.186159		597	0.197132	0.274333	0.193315
598	0.218984	0.186918	0.187167		598	0.199666	0.269885	0.190722
599	0.217681	0.188307	0.186752		599	0.200584	0.266467	0.191789
600	0.217445	0.189476	0.188299		600	0.202212	0.267535	0.189019
601	0.214923	0.187838	0.189761		601	0.20331	0.267451	0.187648
602	0.213695	0.187246	0.189225		602	0.205953	0.264942	0.182254
603	0.213271	0.187445	0.186877		603	0.206417	0.26609	0.18092
604	0.211988	0.185168	0.185293		604	0.209341	0.26728	0.179987
605	0.210485	0.18486	0.185178		605	0.210166	0.268642	0.180184
606	0.208777	0.184604	0.183598		606	0.210158	0.267011	0.181125
607	0.20694	0.1852	0.182879		607	0.210774	0.265326	0.18247
608	0.203311	0.184769	0.183739		608	0.210383	0.264225	0.181307
609	0.202526	0.185975	0.184805		609	0.210167	0.262857	0.181152
610	0.202501	0.183248	0.184308		610	0.210628	0.261744	0.17881
611	0.202147	0.183444	0.184013		611	0.213108	0.260611	0.178534
612	0.203021	0.181746	0.18357		612	0.212533	0.264863	0.177199
613	0.204889	0.180402	0.183979		613	0.213982	0.266475	0.178428
614	0.202944	0.18002	0.184097		614	0.213856	0.265724	0.177591
615	0.199186	0.182545	0.184298		615	0.214806	0.264528	0.176824
616	0.19713	0.183004	0.183165		616	0.215573	0.265885	0.174889
617	0.192848	0.184978	0.181593		617	0.218443	0.262928	0.177064
618	0.190484	0.187717	0.181437		618	0.217721	0.263319	0.175525
619	0.18934	0.189909	0.179619		619	0.21939	0.264166	0.175935
620	0.190069	0.190423	0.178404		620	0.219377	0.264411	0.178483
621	0.188395	0.19297	0.178754		621	0.221592	0.261049	0.179705
622	0.188061	0.195547	0.180752		622	0.221268	0.255889	0.174839
623	0.18598	0.194767	0.178913		623	0.223539	0.251125	0.175419
624	0.184976	0.194004	0.179427		624	0.224066	0.250466	0.1739
625	0.183045	0.195923	0.18005		625	0.226177	0.246423	0.171201
626	0.18354	0.194667	0.181135		626	0.227031	0.245897	0.171158
627	0.182581	0.192954	0.180557		627	0.22867	0.249909	0.177162
628	0.183209	0.192377	0.179762		628	0.228567	0.24886	0.178356
629	0.182422	0.191025	0.178566		629	0.228803	0.246224	0.177663
630	0.181452	0.188012	0.175483		630	0.227125	0.246394	0.18081
631	0.180818	0.187472	0.174886		631	0.227081	0.24202	0.181503
632	0.182997	0.186936	0.174032		632	0.225646	0.241845	0.176919
633	0.182187	0.18692	0.175495		633	0.226069	0.240765	0.172225
634	0.181482	0.186158	0.175201		634	0.226878	0.241125	0.173827
635	0.18154	0.185114	0.176736		635	0.228368	0.241917	0.173466
636	0.18055	0.182958	0.177381		636	0.227436	0.248592	0.170443
637	0.179577	0.182841	0.178699		637	0.229365	0.247241	0.17215
638	0.179631	0.180454	0.177585		638	0.22826	0.247313	0.173446
639	0.182145	0.178971	0.177686		639	0.228362	0.245369	0.173266
640	0.184028	0.179323	0.178165		640	0.228251	0.242255	0.171912
641	0.18619	0.177505	0.176658		641	0.22746	0.241324	0.172247
642	0.186378	0.176062	0.174984		642	0.227716	0.241791	0.172194
643	0.188933	0.177345	0.174046		643	0.229332	0.244817	0.171783
644	0.190412	0.177846	0.175739		644	0.23177	0.244539	0.169243
645	0.192081	0.177102	0.175015		645	0.231987	0.246369	0.167739
646	0.195072	0.179752	0.173788		646	0.231897	0.244195	0.16727
647	0.198388	0.182305	0.173578		647	0.230775	0.240676	0.168388
648	0.201335	0.18142	0.174602		648	0.232163	0.241227	0.170042
649	0.204398	0.182234	0.172114		649	0.230442	0.241472	0.173235
650	0.20648	0.182894	0.171187		650	0.231775	0.240444	0.174508
651	0.208299	0.183368	0.170255		651	0.234101	0.239249	0.176794
652	0.210058	0.180386	0.170399		652	0.235929	0.242185	0.175625
653	0.210256	0.181227	0.171303		653	0.23832	0.237342	0.17529
654	0.210607	0.18096	0.173554		654	0.241702	0.233646	0.172706
655	0.212249	0.179863	0.174796		655	0.24262	0.232641	0.170841
656	0.213248	0.178986	0.175728		656	0.242863	0.233024	0.170881
657	0.213748	0.178747	0.175927		657	0.242988	0.230279	0.16976
658	0.213902	0.179037	0.175361		658	0.242431	0.230176	0.17032
659	0.212639	0.180001	0.174685		659	0.239134	0.230648	0.171516
660	0.213972	0.180967	0.174433		660	0.237841	0.230787	0.173699
661	0.214315	0.181389	0.175651		661	0.235071	0.227568	0.170413
662	0.215408	0.184472	0.176483		662	0.23315	0.225214	0.167748
663	0.21695	0.185805	0.175879		663	0.227894	0.222373	0.164597
664	0.218901	0.186421	0.175473		664	0.226671	0.21941	0.161917
665	0.21507	0.1881	0.175485		665	0.222924	0.216261	0.159758
666	0.21512	0.189667	0.176393		666	0.221758	0.215696	0.158659
667	0.214397	0.189778	0.176436		667	0.219263	0.210584	0.159953
668	0.216446	0.190719	0.176022		668	0.21888	0.206499	0.160058
669	0.217353	0.191397	0.176333		669	0.216508	0.201719	0.159428
670	0.223399	0.191968	0.177226		670	0.214694	0.199007	0.159154
671	0.225561	0.194202	0.178232		671	0.21196	0.192521	0.159512
672	0.226627	0.193292	0.178942		672	0.209909	0.192669	0.156077
673	0.224814	0.192552	0.18		673	0.205854	0.192873	0.155656
674	0.222872	0.192118	0.180646		674	0.201922	0.191285	0.156462
675	0.21915	0.193841	0.180658		675	0.199155	0.185552	0.153789
676	0.216703	0.192458	0.179225		676	0.196101	0.183154	0.152322
677	0.212883	0.194663	0.177799		677	0.192209	0.178691	0.153536
678	0.212059	0.194488	0.176561		678	0.188957	0.174996	0.152811
679	0.210759	0.196477	0.176423		679	0.186774	0.172903	0.150464
680	0.207898	0.19398	0.174289		680	0.18486	0.173296	0.150287
681	0.205705	0.192885	0.174688		681	0.18255	0.171335	0.151306
682	0.204215	0.190655	0.175997		682	0.180748	0.168935	0.148891
683	0.19918	0.190452	0.176352		683	0.179459	0.167065	0.147689
684	0.195904	0.18809	0.174746		684	0.176764	0.166644	0.149008
685	0.193169	0.186329	0.175192		685	0.173988	0.163396	0.150835
686	0.189448	0.184218	0.171809		686	0.172412	0.164146	0.148246
687	0.187521	0.181812	0.169402		687	0.169964	0.163654	0.149289
688	0.185514	0.180491	0.168134		688	0.168715	0.161198	0.150579
689	0.182979	0.179128	0.168326		689	0.167015	0.160762	0.148828
690	0.182248	0.178054	0.167619		690	0.1676	0.159805	0.14814
691	0.178933	0.176437	0.169754		691	0.167252	0.158864	0.149247
692	0.17563	0.177398	0.16774		692	0.167802	0.15735	0.151318
693	0.174937	0.176369	0.167341		693	0.166907	0.157735	0.15071
694	0.173514	0.174499	0.165648		694	0.167003	0.15744	0.151839
695	0.17158	0.173412	0.163162		695	0.165529	0.159328	0.152142
696	0.170686	0.172121	0.162264		696	0.164577	0.158709	0.152015
697	0.170108	0.170468	0.163484		697	0.163861	0.159889	0.149896
698	0.169309	0.169874	0.163497		698	0.163105	0.158638	0.15061
699	0.169786	0.169305	0.163311		699	0.163404	0.158601	0.151322
700	0.167723	0.168943	0.163739		700	0.162998	0.157224	0.14755
701	0.165946	0.167878	0.161642		701	0.162331	0.157102	0.148397
702	0.164692	0.16634	0.160129		702	0.160686	0.156558	0.149164
703	0.16274	0.164402	0.159714		703	0.160161	0.157696	0.14759
704	0.159314	0.163438	0.159894		704	0.159414	0.156032	0.144572
705	0.159013	0.162778	0.16153		705	0.15763	0.154348	0.148431
706	0.158776	0.163693	0.162618		706	0.15797	0.15377	0.147029
707	0.159816	0.163039	0.163577		707	0.15856	0.155275	0.147399
708	0.159297	0.162321	0.161336		708	0.158891	0.153965	0.147935
709	0.159216	0.16221	0.159929		709	0.157375	0.153378	0.148552
710	0.15883	0.161784	0.158159		710	0.157576	0.15209	0.147182
711	0.159358	0.161601	0.157005		711	0.15581	0.151228	0.147849
712	0.158289	0.161714	0.156792		712	0.15526	0.151481	0.147496
713	0.157961	0.162286	0.158346		713	0.154505	0.152074	0.149724
714	0.158666	0.162266	0.16017		714	0.154429	0.152792	0.15033
715	0.158271	0.161755	0.16035		715	0.154191	0.154256	0.149923
716	0.158503	0.162085	0.161013		716	0.154643	0.153495	0.152731
717	0.157981	0.162671	0.161631		717	0.154945	0.152536	0.15452
718	0.15828	0.161844	0.160845		718	0.155199	0.153147	0.151861
719	0.158188	0.162057	0.159726		719	0.153882	0.15205	0.152893
720	0.158405	0.162713	0.159336		720	0.153687	0.153003	0.154064
721	0.157539	0.162168	0.158216		721	0.152411	0.153287	0.150734
722	0.156727	0.160961	0.156051		722	0.150932	0.152943	0.150612
723	0.155965	0.160886	0.157748		723	0.150149	0.15123	0.153281
724	0.154456	0.160265	0.156808		724	0.150838	0.151257	0.154637
725	0.154375	0.159305	0.156625		725	0.151634	0.149947	0.155191
726	0.15503	0.159202	0.156889		726	0.151406	0.149491	0.15782
727	0.155253	0.159928	0.15831		727	0.153154	0.149736	0.154793
728	0.154385	0.158722	0.157361		728	0.153269	0.150046	0.15217
729	0.154551	0.158304	0.15698		729	0.154567	0.151653	0.149191
730	0.153511	0.15847	0.157368		730	0.153973	0.152785	0.14786
731	0.152145	0.157652	0.157467		731	0.155159	0.154445	0.144964
732	0.15333	0.157144	0.157358		732	0.153541	0.153038	0.147861
733	0.154671	0.158318	0.156387		733	0.153907	0.153908	0.149861
734	0.155563	0.158932	0.157084		734	0.153903	0.152789	0.1523
735	0.155273	0.159212	0.155585		735	0.152604	0.152091	0.152751
736	0.156554	0.158384	0.15456		736	0.152241	0.15148	0.155287
737	0.156561	0.158597	0.15404		737	0.152397	0.15111	0.15424
738	0.155469	0.158668	0.155183		738	0.151768	0.149525	0.155077
739	0.154928	0.158897	0.156885		739	0.15138	0.150193	0.155071
740	0.15656	0.159786	0.158075		740	0.152192	0.149375	0.157049
741	0.156983	0.16083	0.15812		741	0.15355	0.14914	0.154164
742	0.155791	0.160649	0.157476		742	0.154069	0.149611	0.15362
743	0.156057	0.160799	0.156609		743	0.153827	0.148591	0.152138
744	0.155713	0.160468	0.156751		744	0.153022	0.148536	0.152689
745	0.154924	0.158934	0.156374		745	0.153191	0.150638	0.150832
746	0.153282	0.15966	0.156566		746	0.152668	0.151464	0.152783
747	0.15469	0.159807	0.157024		747	0.152635	0.15134	0.153988
748	0.154751	0.160119	0.15687		748	0.153583	0.152212	0.153634
749	0.155585	0.160171	0.154912		749	0.154361	0.15333	0.15384
750	0.154881	0.160191	0.156219		750	0.153363	0.153885	0.15322
751	0.155352	0.158113	0.156602		751	0.151962	0.15124	0.151139
752	0.155112	0.158711	0.157405		752	0.151476	0.150699	0.150861
753	0.154817	0.158806	0.157518		753	0.15158	0.151805	0.15
754	0.153576	0.158911	0.157551		754	0.150091	0.150841	0.148972
755	0.1545	0.159917	0.156876		755	0.151529	0.150044	0.14919
756	0.155525	0.161169	0.15789		756	0.151767	0.152239	0.151363
757	0.153233	0.160279	0.156615		757	0.151859	0.154541	0.150361
758	0.152241	0.158697	0.157166		758	0.149932	0.152938	0.153566
759	0.153999	0.158337	0.157241		759	0.151126	0.149865	0.154923
760	0.153943	0.157133	0.15724		760	0.151524	0.149621	0.156173
761	0.152586	0.156528	0.156019		761	0.152183	0.149074	0.155693
762	0.15333	0.157388	0.155815		762	0.152162	0.14773	0.15706
763	0.154472	0.158966	0.155962		763	0.153039	0.149571	0.153942
764	0.153222	0.158602	0.156779		764	0.152334	0.152037	0.15088
765	0.152685	0.159664	0.156273		765	0.150992	0.151593	0.149598
766	0.151518	0.159757	0.156993		766	0.149659	0.150783	0.148213
767	0.153092	0.158909	0.157702		767	0.148864	0.150093	0.146258
768	0.152469	0.159225	0.156532		768	0.148333	0.149219	0.148368
769	0.152745	0.160043	0.154162		769	0.149352	0.15115	0.150025
770	0.152347	0.158769	0.154212		770	0.149006	0.148385	0.149486
771	0.153858	0.159984	0.153705		771	0.149621	0.148722	0.150985
772	0.153264	0.159966	0.153611		772	0.150044	0.150955	0.151579
773	0.153691	0.158539	0.154761		773	0.150976	0.151001	0.150096
774	0.152667	0.157231	0.157709		774	0.15031	0.149951	0.148897
775	0.152665	0.158399	0.157995		775	0.150346	0.15301	0.149562
776	0.15272	0.158229	0.158063		776	0.15058	0.15592	0.149275
777	0.152212	0.158404	0.157901		777	0.151186	0.155989	0.14964
778	0.152627	0.159094	0.157222		778	0.152275	0.15489	0.149218
779	0.153371	0.159292	0.156732		779	0.152871	0.155433	0.150511
780	0.153148	0.16093	0.156903		780	0.153244	0.155249	0.148811
781	0.153517	0.160563	0.157197		781	0.152048	0.151618	0.150055
782	0.153881	0.16116	0.157168		782	0.150944	0.147764	0.150989
783	0.153256	0.159243	0.157508		783	0.149169	0.148281	0.152985
784	0.154312	0.159892	0.157701		784	0.147267	0.147833	0.152073
785	0.15483	0.158441	0.155608		785	0.147538	0.149234	0.155559
786	0.153865	0.15932	0.152982		786	0.149782	0.150888	0.152995
787	0.153506	0.159059	0.152327		787	0.149697	0.151391	0.152312
788	0.152865	0.161801	0.151772		788	0.149713	0.151661	0.152033
789	0.152673	0.160609	0.150831		789	0.151555	0.151743	0.153069
790	0.151826	0.159519	0.153306		790	0.151083	0.151201	0.151388
791	0.151971	0.158141	0.157276		791	0.150473	0.151368	0.154912
792	0.153051	0.158922	0.156802		792	0.150794	0.151861	0.156132
793	0.15282	0.158392	0.156486		793	0.151081	0.154105	0.154901
794	0.150729	0.158945	0.157028		794	0.148655	0.153376	0.153982
795	0.151947	0.159357	0.154692		795	0.148595	0.152408	0.152793
796	0.151908	0.15948	0.153308		796	0.146233	0.154447	0.14967
797	0.150809	0.159172	0.154308		797	0.145958	0.154882	0.14927
798	0.151751	0.15861	0.154273		798	0.146226	0.15309	0.149047
799	0.153556	0.158651	0.152127		799	0.147387	0.152908	0.148951
800	0.153648	0.158599	0.153976		800	0.14742	0.152239	0.149667
801	0.15372	0.159719	0.152534		801	0.148328	0.147987	0.150899
802	0.15347	0.157894	0.152365		802	0.149369	0.148426	0.148354
803	0.152753	0.157459	0.153044		803	0.149187	0.14748	0.148764
804	0.151337	0.157457	0.154074		804	0.150092	0.147067	0.149997
805	0.151381	0.157186	0.152811		805	0.149802	0.148354	0.151753
806	0.151539	0.156182	0.153179		806	0.149496	0.149463	0.153256
807	0.151222	0.156276	0.153066		807	0.149703	0.150437	0.153536
808	0.151502	0.156781	0.151455		808	0.149894	0.14996	0.152637
809	0.151098	0.1566	0.151207		809	0.148545	0.149383	0.150638
810	0.149684	0.156333	0.151117		810	0.148148	0.149491	0.148271
811	0.149644	0.156582	0.151404		811	0.148716	0.149625	0.145603
812	0.150203	0.157902	0.15088		812	0.148802	0.150013	0.146923
813	0.150662	0.157719	0.152447		813	0.148465	0.152731	0.146088
814	0.151677	0.157542	0.150433		814	0.14843	0.154646	0.146087
815	0.151872	0.158831	0.151544		815	0.149156	0.153021	0.146759
816	0.151814	0.156878	0.150846		816	0.149868	0.155583	0.148077
817	0.151023	0.156476	0.151392		817	0.148792	0.153818	0.145754
818	0.151001	0.156261	0.150364		818	0.148757	0.153818	0.148453
819	0.150175	0.157766	0.153581		819	0.149117	0.152739	0.149863
820	0.149839	0.158057	0.152443		820	0.147972	0.151231	0.149525
821	0.149536	0.160388	0.152947		821	0.146642	0.149449	0.149167
822	0.149766	0.159872	0.153741		822	0.145801	0.149273	0.151886
823	0.148957	0.159977	0.154172		823	0.14489	0.149094	0.149175
824	0.150384	0.159142	0.152603		824	0.144736	0.149916	0.146705
825	0.150695	0.157968	0.153637		825	0.145294	0.151628	0.146317
826	0.151157	0.157226	0.153722		826	0.144031	0.152426	0.146862
827	0.150408	0.155896	0.152577		827	0.145011	0.153827	0.145259
828	0.151474	0.156062	0.152072		828	0.145221	0.153599	0.14534
829	0.151531	0.155219	0.152261		829	0.14533	0.15309	0.149053
830	0.152401	0.155268	0.152364		830	0.145792	0.154147	0.152323
831	0.151933	0.155166	0.15201		831	0.14804	0.152813	0.152622
832	0.152876	0.156575	0.152387		832	0.14744	0.153808	0.153138
833	0.152089	0.155475	0.152723		833	0.147614	0.154399	0.156351
834	0.151576	0.156033	0.15285		834	0.147677	0.154321	0.152341
835	0.150726	0.15603	0.151929		835	0.146788	0.153864	0.14816
836	0.149655	0.156742	0.152833		836	0.146947	0.154203	0.147337
837	0.149332	0.156908	0.152275		837	0.146837	0.15106	0.146109
838	0.149301	0.158428	0.15146		838	0.146119	0.15137	0.145911
839	0.150099	0.158717	0.150805		839	0.146642	0.152795	0.14648
840	0.150693	0.158227	0.150934		840	0.147719	0.154817	0.147435
841	0.151521	0.158284	0.149827		841	0.146893	0.15598	0.145974
842	0.151794	0.158637	0.150704		842	0.147057	0.157676	0.14802
843	0.152719	0.158271	0.151421		843	0.147657	0.156379	0.147548
844	0.152429	0.158608	0.15246		844	0.146688	0.154497	0.150112
845	0.152497	0.15897	0.151658		845	0.14583	0.152887	0.15243
846	0.153209	0.158269	0.151779		846	0.145393	0.154388	0.152959
847	0.153823	0.158241	0.151547		847	0.145742	0.154419	0.152914
848	0.153406	0.158122	0.151851		848	0.145807	0.153742	0.149776
849	0.152113	0.1578	0.151089		849	0.146322	0.153825	0.147309
850	0.151989	0.157697	0.151421		850	0.146076	0.15405	0.144849
851	0.152699	0.158281	0.152135		851	0.147163	0.151739	0.145183
852	0.150998	0.158125	0.151705		852	0.148346	0.152554	0.144856
853	0.150249	0.157302	0.15148		853	0.146889	0.152435	0.147535
854	0.150532	0.15766	0.152852		854	0.146339	0.152161	0.149121
855	0.150853	0.157968	0.15307		855	0.146698	0.150265	0.148433
856	0.149436	0.158358	0.15294		856	0.144944	0.149882	0.148706
857	0.150113	0.158057	0.154226		857	0.143216	0.149322	0.147099
858	0.150108	0.158577	0.154405		858	0.144739	0.151394	0.145814
859	0.150557	0.157298	0.153832		859	0.144707	0.151955	0.145852
860	0.149894	0.157787	0.154772		860	0.143725	0.153443	0.147033
861	0.150272	0.156351	0.154981		861	0.143971	0.154452	0.149385
862	0.15179	0.155928	0.154172		862	0.143502	0.152904	0.150887
863	0.152564	0.155335	0.153595		863	0.144082	0.151876	0.151646
864	0.153277	0.156386	0.152761		864	0.145252	0.150555	0.152269
865	0.154497	0.155924	0.152125		865	0.145451	0.148758	0.151787
866	0.154883	0.156193	0.151955		866	0.146808	0.147913	0.150309
867	0.154179	0.157148	0.153293		867	0.148141	0.147577	0.149089
868	0.153965	0.157638	0.153863		868	0.148424	0.1489	0.148583
869	0.153655	0.156902	0.15372		869	0.146723	0.150666	0.147291
870	0.152585	0.157172	0.15525		870	0.147651	0.152649	0.1473
871	0.152357	0.157117	0.155572		871	0.147071	0.153853	0.146532
872	0.151965	0.157506	0.154412		872	0.147398	0.154963	0.149077
873	0.151583	0.158625	0.156115		873	0.145782	0.1534	0.145595
874	0.150477	0.156932	0.156215		874	0.147335	0.155133	0.144938
875	0.15103	0.156687	0.153429		875	0.148263	0.153283	0.145744
876	0.149582	0.156614	0.152796		876	0.148778	0.1511	0.144864
877	0.15003	0.156277	0.151982		877	0.148186	0.153225	0.143997
878	0.150048	0.153989	0.149417		878	0.148248	0.152575	0.146062
879	0.15105	0.155193	0.150288		879	0.147751	0.151584	0.147995
880	0.150275	0.154871	0.151141		880	0.147068	0.15186	0.148759
881	0.15134	0.155439	0.15249		881	0.146582	0.152302	0.149494
882	0.150498	0.155505	0.153806		882	0.145782	0.151901	0.149342
883	0.15117	0.156792	0.155427		883	0.146056	0.151071	0.149311
884	0.150746	0.15644	0.154305		884	0.146223	0.147944	0.148249
885	0.151594	0.15567	0.156221		885	0.146025	0.148461	0.148258
886	0.152193	0.15539	0.155383		886	0.145697	0.148666	0.148852
887	0.1522	0.153792	0.153682		887	0.145247	0.146249	0.148535
888	0.150876	0.154128	0.153525		888	0.146269	0.148821	0.148034
889	0.14968	0.154878	0.154135		889	0.146017	0.150268	0.148913
890	0.148839	0.153544	0.152071		890	0.145928	0.149893	0.146931
891	0.148497	0.151998	0.151257		891	0.145694	0.148517	0.146549
892	0.148343	0.152447	0.151297		892	0.14607	0.148683	0.146409
893	0.149096	0.151093	0.150897		893	0.144277	0.14569	0.149072
894	0.1502	0.150576	0.151444		894	0.14304	0.145315	0.149008
895	0.149599	0.152085	0.15278		895	0.142595	0.147224	0.152567
896	0.148872	0.152347	0.153423		896	0.143563	0.148567	0.152155
897	0.147964	0.152712	0.153528		897	0.144574	0.150696	0.151984
898	0.146812	0.153061	0.153768		898	0.143486	0.153202	0.149025
899	0.14691	0.154787	0.153873		899	0.143608	0.153944	0.147881
900	0.146147	0.155498	0.15187		900	0.142828	0.15227	0.14646
901	0.146483	0.155369	0.151274		901	0.140603	0.151653	0.147055
902	0.147781	0.155377	0.1528		902	0.139988	0.14984	0.147572
903	0.149576	0.155761	0.15138		903	0.141481	0.148283	0.152014
904	0.149185	0.153915	0.151653		904	0.143026	0.148219	0.151358
905	0.151074	0.153068	0.153509		905	0.143769	0.146615	0.150935
906	0.151995	0.153654	0.153766		906	0.144298	0.148092	0.149086
907	0.152213	0.152885	0.152025		907	0.143415	0.150716	0.147168
908	0.151829	0.15165	0.153122		908	0.143114	0.151322	0.144153
909	0.152019	0.151607	0.151894		909	0.141744	0.152744	0.145602
910	0.151899	0.152232	0.151886		910	0.141132	0.151732	0.144519
911	0.152013	0.152281	0.151032		911	0.141748	0.151556	0.145094
912	0.151609	0.152951	0.152103		912	0.140751	0.14823	0.145553
913	0.15107	0.153861	0.152322		913	0.140912	0.148592	0.143279
914	0.151416	0.153839	0.152675		914	0.141142	0.148787	0.141808
915	0.150793	0.153344	0.153142		915	0.141759	0.151349	0.144779
916	0.150142	0.153281	0.153994		916	0.14241	0.149793	0.145021
917	0.150527	0.152381	0.154075		917	0.14282	0.150333	0.14556
918	0.150345	0.153031	0.15331		918	0.143432	0.148808	0.148262
919	0.149577	0.154503	0.15445		919	0.143782	0.146877	0.149881
920	0.148668	0.154373	0.152928		920	0.143945	0.148535	0.148533
921	0.14798	0.155803	0.152437		921	0.14381	0.14825	0.149311
922	0.147409	0.156514	0.151415		922	0.14424	0.148108	0.150131
923	0.146932	0.155867	0.15159		923	0.143234	0.148924	0.150393
924	0.146136	0.15586	0.14975		924	0.142469	0.149446	0.150492
925	0.145651	0.155258	0.150203		925	0.141513	0.145473	0.151634
926	0.144896	0.154245	0.150886		926	0.140749	0.145612	0.148276
927	0.144714	0.153214	0.152037		927	0.141142	0.146351	0.147819
928	0.145545	0.152945	0.15102		928	0.142057	0.146685	0.148309
929	0.145915	0.153708	0.151941		929	0.142643	0.145866	0.148676
930	0.145926	0.154033	0.152204		930	0.143124	0.147867	0.145588
931	0.145476	0.155456	0.152269		931	0.142626	0.149805	0.147528
932	0.146389	0.157207	0.151914		932	0.142791	0.14937	0.147372
933	0.14655	0.156915	0.151737		933	0.140888	0.15005	0.146487
934	0.146087	0.155086	0.152022		934	0.139653	0.150701	0.144525
935	0.14633	0.154653	0.150909		935	0.138333	0.149498	0.144373
936	0.146783	0.153149	0.149987		936	0.138232	0.148785	0.145099
937	0.14748	0.153408	0.149648		937	0.137024	0.149003	0.144028
938	0.147495	0.153548	0.15098		938	0.139045	0.147471	0.143816
939	0.149548	0.153758	0.150596		939	0.140195	0.146771	0.143847
940	0.150077	0.154028	0.151726		940	0.141396	0.146807	0.144899
941	0.150823	0.153707	0.151198		941	0.141484	0.145068	0.143901
942	0.150034	0.151529	0.150511		942	0.143127	0.144194	0.147604
943	0.150216	0.151023	0.150194		943	0.143002	0.144236	0.147497
944	0.149083	0.14966	0.15108		944	0.142845	0.143211	0.148732
945	0.148912	0.149765	0.150727		945	0.143329	0.144219	0.148601
946	0.14858	0.150576	0.152134		946	0.144178	0.145603	0.148132
947	0.147477	0.152102	0.152633		947	0.142974	0.145974	0.144792
948	0.146962	0.153192	0.152912		948	0.142428	0.145675	0.144469
949	0.146176	0.154001	0.15096		949	0.142441	0.147003	0.143273
950	0.146278	0.154218	0.150656		950	0.140799	0.148551	0.143252
951	0.147255	0.154483	0.149192		951	0.141406	0.148406	0.145971
952	0.148012	0.152695	0.148989		952	0.14199	0.146968	0.146833
953	0.148119	0.151767	0.147993		953	0.141785	0.147166	0.148113
954	0.148869	0.152079	0.149692		954	0.1419	0.147181	0.148787
955	0.150524	0.152386	0.150078		955	0.143327	0.144221	0.149671
956	0.149604	0.151872	0.150891		956	0.141823	0.144209	0.149701
957	0.149738	0.152679	0.151503		957	0.14175	0.146255	0.149972
958	0.14972	0.153674	0.1533		958	0.141797	0.146953	0.149754
959	0.14946	0.154647	0.152481		959	0.141242	0.147687	0.148822
960	0.146715	0.15472	0.15108		960	0.141011	0.149821	0.146473
961	0.14611	0.15534	0.15032		961	0.141095	0.149942	0.14407
962	0.146825	0.156294	0.15044		962	0.141237	0.149845	0.14223
963	0.1465	0.154374	0.1498		963	0.141111	0.149674	0.142963
964	0.146701	0.153097	0.148427		964	0.14045	0.148732	0.143864
965	0.147507	0.152993	0.149666		965	0.140965	0.148073	0.14533
966	0.149245	0.153148	0.150028		966	0.141219	0.1476	0.146207
967	0.147505	0.153305	0.1483		967	0.140447	0.147384	0.149613
968	0.146608	0.153684	0.146953		968	0.140609	0.146631	0.147894
969	0.146832	0.155205	0.148081		969	0.142127	0.146792	0.147437
970	0.147335	0.154941	0.148424		970	0.142414	0.14796	0.147662
971	0.145559	0.152529	0.149643		971	0.142615	0.148378	0.148491
972	0.146265	0.151691	0.151192		972	0.143159	0.147011	0.147721
973	0.147624	0.153002	0.151853		973	0.142278	0.14683	0.149608
974	0.148287	0.151492	0.152567		974	0.141492	0.1474	0.149634
975	0.148615	0.152088	0.152042		975	0.140895	0.145769	0.147604
976	0.149623	0.154436	0.151847		976	0.140242	0.145343	0.148484
977	0.14911	0.154346	0.15186		977	0.140571	0.146924	0.145878
978	0.149434	0.154247	0.152311		978	0.141166	0.147215	0.144546
979	0.148967	0.155553	0.152836		979	0.14185	0.146157	0.143954
980	0.14938	0.156008	0.153742		980	0.140503	0.146358	0.145563
981	0.149084	0.155568	0.153633		981	0.142051	0.147032	0.144431
982	0.150765	0.155413	0.152913		982	0.140823	0.147711	0.146019
983	0.149948	0.155546	0.151355		983	0.140582	0.147791	0.146604
984	0.148546	0.155503	0.15042		984	0.139552	0.149678	0.147531
985	0.147267	0.154434	0.150365		985	0.141386	0.150748	0.145279
986	0.147443	0.155224	0.152696		986	0.141163	0.149943	0.145004
987	0.146601	0.155999	0.152836		987	0.143617	0.14845	0.142577
988	0.146113	0.156311	0.153759		988	0.143565	0.147845	0.14291
989	0.147636	0.155378	0.155964		989	0.143931	0.146345	0.14375
990	0.149768	0.155559	0.15613		990	0.143833	0.145763	0.144434
991	0.148797	0.154847	0.154655		991	0.144836	0.145131	0.142765
992	0.147695	0.15379	0.152397		992	0.144539	0.146814	0.144262
993	0.14809	0.153639	0.152643		993	0.146804	0.149384	0.145011
994	0.147901	0.153092	0.151291		994	0.14691	0.151137	0.14396
995	0.146699	0.154195	0.149839		995	0.147893	0.151409	0.144593
996	0.146659	0.154554	0.150266		996	0.146443	0.151944	0.144758
997	0.147367	0.15523	0.153593		997	0.145208	0.150926	0.145787
998	0.148536	0.155725	0.154842		998	0.144236	0.148267	0.144247
999	0.148019	0.156688	0.155032		999	0.143152	0.149102	0.145165
1000	0.148702	0.155993	0.156474		1000	0.141705	0.148203	0.147388
1001	0.148597	0.154466	0.154684		1001	0.141318	0.149428	0.15077
1002	0.14902	0.15438	0.154605		1002	0.141552	0.15167	0.151191
1003	0.148747	0.154397	0.155052		1003	0.141151	0.151435	0.153377
1004	0.149495	0.155574	0.154949		1004	0.142661	0.148512	0.154839
1005	0.149171	0.15579	0.153568		1005	0.142462	0.149298	0.153899
1006	0.150112	0.156365	0.153873		1006	0.143665	0.150591	0.152462
1007	0.14938	0.156876	0.151978		1007	0.144093	0.149471	0.154079
1008	0.148976	0.15687	0.150141		1008	0.144421	0.151185	0.152615
1009	0.14779	0.156367	0.149708		1009	0.145983	0.15233	0.151136
1010	0.14719	0.156587	0.150718		1010	0.146748	0.152685	0.150686
1011	0.147835	0.158336	0.151091		1011	0.146531	0.152197	0.151895
1012	0.147942	0.158899	0.152965		1012	0.147155	0.152838	0.151083
1013	0.148791	0.161146	0.153178		1013	0.147653	0.153173	0.150693
1014	0.150595	0.161125	0.152619		1014	0.146597	0.152823	0.153835
1015	0.150865	0.161668	0.152604		1015	0.146588	0.154717	0.154836
1016	0.150961	0.160931	0.153123		1016	0.146223	0.152963	0.154414
1017	0.151546	0.161417	0.153026		1017	0.146388	0.151087	0.155086
1018	0.152167	0.160724	0.153761		1018	0.146883	0.152692	0.155704
1019	0.152493	0.161665	0.153777		1019	0.146729	0.154625	0.155678
1020	0.153787	0.162753	0.155077		1020	0.147905	0.155922	0.160466
1021	0.156301	0.162615	0.154896		1021	0.149511	0.156193	0.16139
1022	0.157563	0.163819	0.155317		1022	0.149488	0.156306	0.159243
1023	0.156349	0.163491	0.155842		1023	0.149302	0.155604	0.161409
1024	0.157681	0.16327	0.157126		1024	0.150632	0.154752	0.16126
1025	0.157973	0.164795	0.156196		1025	0.150029	0.153074	0.15849
1026	0.15718	0.167031	0.156464		1026	0.150213	0.153571	0.161253
1027	0.158482	0.167048	0.156992		1027	0.151116	0.157241	0.162272
1028	0.161297	0.168604	0.156229		1028	0.152604	0.156525	0.162362
1029	0.161034	0.170323	0.155774		1029	0.153432	0.156589	0.161677
1030	0.160624	0.169918	0.155534		1030	0.152565	0.156822	0.162276
1031	0.160978	0.169755	0.155666		1031	0.152815	0.159118	0.160456
1032	0.160218	0.169223	0.154798		1032	0.152786	0.158615	0.163296
1033	0.1607	0.169223	0.155971		1033	0.152684	0.160273	0.164154
1034	0.161025	0.170239	0.156621		1034	0.152525	0.160544	0.165771
1035	0.162323	0.169132	0.156882		1035	0.154911	0.161067	0.166434
1036	0.162796	0.169546	0.156875		1036	0.155523	0.162421	0.169407
1037	0.163079	0.171991	0.157511		1037	0.156869	0.162674	0.167621
1038	0.162447	0.171902	0.158613		1038	0.158495	0.163022	0.169208
1039	0.162217	0.171379	0.158561		1039	0.160074	0.166334	0.169132
1040	0.162269	0.172172	0.159381		1040	0.160099	0.165988	0.169033
1041	0.163138	0.171413	0.16008		1041	0.161518	0.164384	0.168472
1042	0.164751	0.171047	0.160092		1042	0.161135	0.162933	0.173648
1043	0.165999	0.171998	0.159205		1043	0.160677	0.16402	0.172042
1044	0.166196	0.174164	0.15945		1044	0.159806	0.162495	0.173708
1045	0.166358	0.175326	0.158376		1045	0.160591	0.162247	0.175687
1046	0.16548	0.177481	0.160522		1046	0.160155	0.161813	0.176967
1047	0.162802	0.175906	0.160031		1047	0.16175	0.165714	0.17533
1048	0.162996	0.178197	0.160747		1048	0.161688	0.164425	0.177536
1049	0.165519	0.178028	0.16186		1049	0.162213	0.164493	0.176356
1050	0.167722	0.178659	0.16292		1050	0.162897	0.166155	0.178182
1051	0.168191	0.177992	0.16095		1051	0.163171	0.166734	0.177723
1052	0.17024	0.180272	0.160505		1052	0.162981	0.162476	0.177964
1053	0.170737	0.17934	0.161447		1053	0.162309	0.1631	0.178886
1054	0.170361	0.177651	0.160978		1054	0.161556	0.16486	0.179213
1055	0.169573	0.177485	0.161041		1055	0.160956	0.166517	0.177856
1056	0.171788	0.178442	0.161923		1056	0.159315	0.166611	0.178572
1057	0.171731	0.178886	0.163677		1057	0.158692	0.168619	0.179045
1058	0.170661	0.179149	0.161011		1058	0.160061	0.168918	0.1768
1059	0.17019	0.179546	0.162597		1059	0.160982	0.168369	0.174733
1060	0.170196	0.180549	0.164516		1060	0.161141	0.165885	0.174763
1061	0.169266	0.179157	0.164725		1061	0.163065	0.165503	0.172607
1062	0.170416	0.178042	0.165059		1062	0.163383	0.165929	0.171712
1063	0.170969	0.176183	0.1677		1063	0.162788	0.167862	0.172131
1064	0.170795	0.178826	0.168247		1064	0.163128	0.167722	0.174338
1065	0.170727	0.177899	0.168172		1065	0.163687	0.168477	0.174309
1066	0.17023	0.179458	0.165484		1066	0.163043	0.172188	0.1762
1067	0.170984	0.180704	0.166574		1067	0.163341	0.172645	0.178414
1068	0.172257	0.182229	0.166381		1068	0.163582	0.172072	0.180541
1069	0.1732	0.179795	0.165237		1069	0.163746	0.172279	0.180838
1070	0.172708	0.180499	0.16468		1070	0.163763	0.173929	0.181726
1071	0.172151	0.180207	0.167569		1071	0.165128	0.17256	0.179155
1072	0.171836	0.181168	0.166176		1072	0.165287	0.174784	0.177211
1073	0.169462	0.181855	0.165892		1073	0.166518	0.175156	0.175374
1074	0.170178	0.182508	0.166181		1074	0.167221	0.174079	0.174135
1075	0.169679	0.181316	0.167211		1075	0.167905	0.172318	0.170881
1076	0.171701	0.181818	0.168655		1076	0.168522	0.175447	0.173129
1077	0.170125	0.180622	0.168654		1077	0.168598	0.172094	0.173759
1078	0.17219	0.179169	0.169934		1078	0.167964	0.173213	0.175935
1079	0.171943	0.17861	0.169124		1079	0.166459	0.173889	0.177985
1080	0.1738	0.179973	0.168239		1080	0.165933	0.174529	0.180055
1081	0.171909	0.179935	0.168421		1081	0.163709	0.169298	0.1808
1082	0.172346	0.179932	0.169227		1082	0.163579	0.170826	0.178908
1083	0.173058	0.179445	0.16943		1083	0.164763	0.169326	0.174578
1084	0.171655	0.179411	0.168321		1084	0.165162	0.168812	0.173
1085	0.17189	0.177231	0.169118		1085	0.165118	0.170326	0.172212
1086	0.172751	0.176519	0.167904		1086	0.166363	0.172101	0.170768
1087	0.172297	0.176326	0.16863		1087	0.167783	0.172619	0.170393
1088	0.170212	0.176077	0.168189		1088	0.166936	0.173024	0.171702
1089	0.169387	0.17743	0.170549		1089	0.167374	0.173715	0.171209
1090	0.168989	0.178226	0.170206		1090	0.168585	0.17216	0.171118
1091	0.169199	0.178149	0.170885		1091	0.168769	0.170934	0.169864
1092	0.16979	0.178955	0.170667		1092	0.167528	0.168461	0.171454
1093	0.169486	0.17937	0.171778		1093	0.16811	0.166276	0.170819
1094	0.171342	0.177945	0.171589		1094	0.168652	0.167085	0.17267
1095	0.170794	0.179003	0.172302		1095	0.168067	0.168064	0.173336
1096	0.169767	0.178713	0.172869		1096	0.167115	0.171965	0.172274
1097	0.17043	0.178219	0.172765		1097	0.167462	0.177072	0.171091
1098	0.170293	0.179259	0.173071		1098	0.166096	0.177741	0.172204
1099	0.169962	0.180683	0.173254		1099	0.165163	0.177502	0.171824
1100	0.170749	0.180372	0.172082		1100	0.164396	0.175878	0.170828
1101	0.170859	0.18069	0.170793		1101	0.166105	0.173719	0.17204
1102	0.170602	0.179717	0.171019		1102	0.166239	0.170219	0.171377
1103	0.171598	0.178813	0.169835		1103	0.166194	0.170956	0.16993
1104	0.17052	0.178257	0.169574		1104	0.166388	0.171804	0.170892
1105	0.168247	0.178827	0.170222		1105	0.16693	0.174317	0.169055
1106	0.168883	0.179308	0.171089		1106	0.16608	0.176	0.168717
1107	0.168697	0.178839	0.171436		1107	0.164575	0.176462	0.169604
1108	0.16964	0.180433	0.172133		1108	0.164411	0.178763	0.169825
1109	0.168633	0.178624	0.171891		1109	0.16489	0.181216	0.168675
1110	0.169424	0.177318	0.171956		1110	0.164466	0.181751	0.169678
1111	0.169155	0.177857	0.171971		1111	0.165017	0.181055	0.170097
1112	0.170497	0.178642	0.171271		1112	0.165583	0.178788	0.171393
1113	0.169905	0.176949	0.170806		1113	0.167595	0.17591	0.171831
1114	0.169742	0.178299	0.172462		1114	0.166962	0.173578	0.172147
1115	0.171149	0.17816	0.173861		1115	0.166575	0.17342	0.172938
1116	0.171025	0.177804	0.172916		1116	0.165631	0.174706	0.175259
1117	0.169431	0.176723	0.173215		1117	0.16571	0.177348	0.17387
1118	0.168629	0.174998	0.173438		1118	0.164462	0.180718	0.174817
1119	0.169641	0.173797	0.17297		1119	0.164159	0.183298	0.170425
1120	0.168381	0.173505	0.172663		1120	0.164286	0.183497	0.170145
1121	0.168092	0.173136	0.17433		1121	0.165034	0.181909	0.169641
1122	0.16727	0.173471	0.175386		1122	0.165258	0.181508	0.168272
1123	0.1673	0.176764	0.175066		1123	0.164543	0.179852	0.166377
1124	0.166439	0.178874	0.17455		1124	0.164516	0.175381	0.168493
1125	0.166909	0.179134	0.17355		1125	0.165249	0.174998	0.16727
1126	0.165961	0.178481	0.173869		1126	0.163616	0.175369	0.166049
1127	0.165975	0.178891	0.172359		1127	0.162063	0.173769	0.166413
1128	0.164814	0.177973	0.173356		1128	0.162362	0.174295	0.166919
1129	0.165734	0.175697	0.173587		1129	0.161551	0.17449	0.169279
1130	0.165541	0.175558	0.173941		1130	0.159881	0.171483	0.168451
1131	0.165837	0.174482	0.17364		1131	0.159731	0.172237	0.168037
1132	0.165583	0.172632	0.174454		1132	0.161175	0.174772	0.167761
1133	0.165709	0.171412	0.174296		1133	0.160063	0.173032	0.165805
1134	0.165748	0.170802	0.173805		1134	0.161286	0.174208	0.165431
1135	0.165278	0.170847	0.175539		1135	0.160856	0.175246	0.165963
1136	0.165686	0.172935	0.17684		1136	0.161285	0.176367	0.163817
1137	0.165864	0.174845	0.176553		1137	0.161003	0.175471	0.164873
1138	0.166045	0.173829	0.173819		1138	0.162259	0.176696	0.166206
1139	0.164985	0.175013	0.174463		1139	0.162195	0.17693	0.162486
1140	0.164828	0.173913	0.17215		1140	0.163701	0.178751	0.162971
1141	0.162859	0.17202	0.16808		1141	0.163875	0.178191	0.163121
1142	0.164344	0.172302	0.169293		1142	0.163287	0.180364	0.159961
1143	0.164036	0.173862	0.170076		1143	0.162679	0.180959	0.159268
1144	0.165552	0.173126	0.16987		1144	0.162195	0.180704	0.160472
1145	0.165623	0.173304	0.16981		1145	0.160975	0.178452	0.160074
1146	0.167785	0.174515	0.173495		1146	0.161684	0.175804	0.157663
1147	0.167174	0.172405	0.173547		1147	0.161903	0.17576	0.157889
1148	0.1679	0.169924	0.175355		1148	0.161104	0.17439	0.15873
1149	0.166524	0.168697	0.174571		1149	0.160315	0.175501	0.157904
1150	0.165734	0.169048	0.176422		1150	0.161622	0.175042	0.156931
1151	0.165029	0.169304	0.174932		1151	0.160004	0.175427	0.158364
1152	0.16446	0.170334	0.174378		1152	0.160442	0.175629	0.16088
1153	0.163962	0.17218	0.172684		1153	0.161059	0.175128	0.160473
1154	0.163776	0.173808	0.174425		1154	0.162283	0.173263	0.162304
1155	0.164985	0.17243	0.173524		1155	0.161373	0.176369	0.161543
1156	0.165185	0.17096	0.173629		1156	0.161517	0.175054	0.162095
1157	0.163967	0.170773	0.174996		1157	0.160877	0.172521	0.161643
1158	0.163056	0.169115	0.176245		1158	0.160371	0.173768	0.158841
1159	0.162907	0.167782	0.174836		1159	0.160543	0.172334	0.1561
1160	0.162961	0.168075	0.173992		1160	0.159682	0.168912	0.157193
1161	0.163173	0.168852	0.172146		1161	0.159772	0.16938	0.157339
1162	0.163876	0.16933	0.1696		1162	0.158763	0.168776	0.153764
1163	0.164751	0.170113	0.169346		1163	0.159074	0.166594	0.158156
1164	0.165123	0.171731	0.169783		1164	0.158389	0.168151	0.158847
1165	0.163554	0.172677	0.170361		1165	0.158705	0.169559	0.157695
1166	0.16348	0.17133	0.172148		1166	0.158159	0.169277	0.155642
1167	0.163347	0.170837	0.17112		1167	0.158161	0.171036	0.159957
1168	0.163219	0.170716	0.172103		1168	0.15805	0.171675	0.158408
1169	0.161922	0.168707	0.171276		1169	0.157697	0.173353	0.160666
1170	0.162709	0.167835	0.1698		1170	0.157944	0.172862	0.162554
1171	0.161904	0.166852	0.170416		1171	0.157538	0.17363	0.16448
1172	0.161555	0.167283	0.17208		1172	0.157948	0.170698	0.161936
1173	0.159898	0.16724	0.170071		1173	0.158015	0.169903	0.159098
1174	0.161199	0.168498	0.170905		1174	0.158006	0.167247	0.158046
1175	0.159924	0.168632	0.171023		1175	0.159086	0.168164	0.15573
1176	0.159976	0.170719	0.170766		1176	0.159584	0.167456	0.156972
1177	0.160251	0.169643	0.169891		1177	0.160104	0.169186	0.159573
1178	0.160522	0.169243	0.170709		1178	0.15874	0.170753	0.161252
1179	0.159943	0.167171	0.170684		1179	0.158173	0.170386	0.162283
1180	0.161163	0.167601	0.172263		1180	0.156164	0.169797	0.164399
1181	0.162443	0.16626	0.170428		1181	0.155584	0.169242	0.164942
1182	0.161988	0.16592	0.171427		1182	0.154774	0.168817	0.164057
1183	0.163492	0.166503	0.170656		1183	0.156121	0.167534	0.166407
1184	0.163838	0.167537	0.172143		1184	0.156556	0.168784	0.164009
1185	0.163313	0.166146	0.170065		1185	0.157181	0.169217	0.161307
1186	0.162071	0.165934	0.170757		1186	0.157239	0.168361	0.160149
1187	0.16241	0.164881	0.170976		1187	0.157836	0.168054	0.159475
1188	0.160481	0.163868	0.170484		1188	0.15671	0.168992	0.157231
1189	0.158955	0.163517	0.166891		1189	0.156566	0.16688	0.155653
1190	0.158701	0.163274	0.167632		1190	0.15691	0.164847	0.156703
1191	0.158789	0.163477	0.167016		1191	0.156824	0.168463	0.157276
1192	0.158514	0.163006	0.165892		1192	0.15695	0.168965	0.155991
1193	0.159236	0.163414	0.167465		1193	0.156949	0.169431	0.157399
1194	0.158847	0.162307	0.167645		1194	0.156471	0.173517	0.160796
1195	0.158303	0.162474	0.167397		1195	0.15691	0.174695	0.164161
1196	0.159034	0.16234	0.167657		1196	0.158196	0.172678	0.162498
1197	0.159365	0.163719	0.167633		1197	0.156531	0.173156	0.163109
1198	0.158583	0.163399	0.165156		1198	0.157396	0.171479	0.161065
1199	0.159927	0.163301	0.166519		1199	0.158122	0.166392	0.161132
1200	0.160266	0.16417	0.16622		1200	0.157897	0.167843	0.158278
1201	0.158759	0.163161	0.167322		1201	0.156925	0.168155	0.158954
1202	0.157216	0.163699	0.167677		1202	0.158089	0.166621	0.158385
1203	0.158559	0.164487	0.170024		1203	0.157385	0.166241	0.159226
1204	0.158476	0.164996	0.169187		1204	0.156039	0.168496	0.158307
1205	0.1562	0.16378	0.1695		1205	0.155499	0.166102	0.15776
1206	0.156471	0.165791	0.168027		1206	0.156665	0.165679	0.156688
1207	0.157506	0.166537	0.169027		1207	0.156627	0.166445	0.155223
1208	0.157774	0.16567	0.167348		1208	0.156294	0.169154	0.154356
1209	0.15772	0.165305	0.167182		1209	0.156724	0.170795	0.153127
1210	0.159595	0.165925	0.166272		1210	0.156024	0.171703	0.15433
1211	0.158896	0.164157	0.166089		1211	0.154287	0.170226	0.155775
1212	0.159613	0.160869	0.163893		1212	0.152908	0.169378	0.15576
1213	0.159517	0.159968	0.164938		1213	0.152904	0.170495	0.15485
1214	0.159794	0.160695	0.16604		1214	0.151996	0.169274	0.154642
1215	0.160777	0.160966	0.167439		1215	0.151766	0.16973	0.153541
1216	0.161003	0.161146	0.167242		1216	0.153121	0.172719	0.151676
1217	0.16151	0.163771	0.168572		1217	0.153308	0.173623	0.154163
1218	0.15878	0.163354	0.166932		1218	0.15375	0.169535	0.155374
1219	0.157392	0.164026	0.165226		1219	0.154537	0.169587	0.155733
1220	0.157261	0.163044	0.165047		1220	0.155491	0.16925	0.156725
1221	0.157547	0.162913	0.164976		1221	0.153682	0.166258	0.156146
1222	0.156338	0.161034	0.164061		1222	0.154765	0.16554	0.156072
1223	0.158534	0.162425	0.164448		1223	0.1548	0.168127	0.155837
1224	0.15905	0.162325	0.163874		1224	0.155495	0.165758	0.157443
1225	0.157774	0.162476	0.164776		1225	0.154465	0.165807	0.154
1226	0.156723	0.163349	0.166101		1226	0.156144	0.166118	0.15423
1227	0.154865	0.162664	0.16701		1227	0.1551	0.166177	0.153527
1228	0.154764	0.163226	0.166802		1228	0.155917	0.163795	0.154095
1229	0.154041	0.163268	0.166533		1229	0.155865	0.167338	0.150634
1230	0.153806	0.16249	0.164116		1230	0.157383	0.16672	0.156095
1231	0.154116	0.161335	0.162384		1231	0.156727	0.164442	0.157456
1232	0.154835	0.161779	0.16096		1232	0.156768	0.165066	0.158567
1233	0.153303	0.160346	0.163208		1233	0.154777	0.164485	0.159146
1234	0.153364	0.15854	0.164081		1234	0.154236	0.161521	0.161611
1235	0.153365	0.158642	0.164067		1235	0.152491	0.161971	0.159201
1236	0.15195	0.160031	0.16436		1236	0.152633	0.164917	0.156933
1237	0.152993	0.159892	0.164758		1237	0.154136	0.163451	0.153724
1238	0.153585	0.160078	0.16254		1238	0.15506	0.164207	0.15214
1239	0.15354	0.161279	0.164199		1239	0.155535	0.163365	0.152295
1240	0.155142	0.161483	0.165407		1240	0.155202	0.161752	0.151545
1241	0.154805	0.159759	0.164498		1241	0.155614	0.160992	0.153087
1242	0.155244	0.160843	0.164179		1242	0.154998	0.1623	0.155709
1243	0.155274	0.161047	0.164518		1243	0.154373	0.163141	0.155173
1244	0.155335	0.159817	0.164063		1244	0.153968	0.164292	0.155117
1245	0.152432	0.160876	0.162375		1245	0.155937	0.166138	0.155796
1246	0.152908	0.161104	0.160721		1246	0.156457	0.166033	0.156621
1247	0.1514	0.161209	0.15983		1247	0.156368	0.164958	0.15536
1248	0.150764	0.160451	0.15965		1248	0.156687	0.16301	0.156043
1249	0.152901	0.161538	0.157816		1249	0.156886	0.162572	0.156527
1250	0.153333	0.160979	0.159772		1250	0.154281	0.162441	0.156478
1251	0.153743	0.1593	0.160582		1251	0.151978	0.162264	0.155581
1252	0.153447	0.157559	0.162611		1252	0.150657	0.162219	0.15459
1253	0.153712	0.158166	0.161426		1253	0.150167	0.162694	0.153977
1254	0.152053	0.15798	0.162426		1254	0.148173	0.163147	0.15359
1255	0.153464	0.158435	0.160517		1255	0.149375	0.162148	0.152388
1256	0.153714	0.159912	0.163239		1256	0.14938	0.164027	0.15247
1257	0.154532	0.161756	0.160684		1257	0.150076	0.164007	0.15459
1258	0.154785	0.161341	0.161895		1258	0.150342	0.164343	0.155339
1259	0.153966	0.160822	0.159746		1259	0.150882	0.164122	0.154761
1260	0.153413	0.160411	0.161589		1260	0.151514	0.162526	0.155381
1261	0.151693	0.161121	0.158958		1261	0.151906	0.160493	0.153666
1262	0.150399	0.160048	0.159614		1262	0.152311	0.159081	0.151686
1263	0.151022	0.159796	0.158908		1263	0.153142	0.159852	0.150464
1264	0.151595	0.16075	0.159738		1264	0.155541	0.159765	0.149657
1265	0.151427	0.160512	0.159754		1265	0.155128	0.160866	0.148107
1266	0.152644	0.160926	0.159859		1266	0.154663	0.162549	0.147906
1267	0.15408	0.161575	0.160546		1267	0.154574	0.165255	0.148027
1268	0.153176	0.16177	0.161085		1268	0.154285	0.165946	0.149348
1269	0.151287	0.159933	0.160652		1269	0.152581	0.164624	0.148343
1270	0.151468	0.160071	0.158951		1270	0.153726	0.164545	0.149885
1271	0.152735	0.159607	0.159122		1271	0.154549	0.162897	0.150582
1272	0.152243	0.158225	0.158115		1272	0.154359	0.161257	0.149843
1273	0.151629	0.157521	0.157801		1273	0.154286	0.159947	0.150693
1274	0.153836	0.158639	0.159344		1274	0.154416	0.160212	0.151055
1275	0.153661	0.158819	0.158592		1275	0.153562	0.160245	0.150611
1276	0.152243	0.15829	0.157093		1276	0.154302	0.160334	0.152307
1277	0.153048	0.159593	0.158709		1277	0.153264	0.158732	0.152911
1278	0.153713	0.16068	0.157084		1278	0.151861	0.158065	0.151479
1279	0.153285	0.160864	0.156026		1279	0.151335	0.158623	0.152156
1280	0.15349	0.161319	0.156568		1280	0.15047	0.158395	0.151112
1281	0.152961	0.160926	0.158326		1281	0.149308	0.157605	0.150754
1282	0.150614	0.160135	0.157862		1282	0.150956	0.158806	0.153193
1283	0.151243	0.158923	0.158897		1283	0.151868	0.160538	0.153373
1284	0.150284	0.157494	0.159666		1284	0.152607	0.158408	0.151566
1285	0.150052	0.156497	0.160668		1285	0.15287	0.159359	0.151093
1286	0.150462	0.156022	0.16157		1286	0.153236	0.159829	0.150671
1287	0.152089	0.156696	0.161961		1287	0.151758	0.157695	0.148754
1288	0.149986	0.157616	0.161402		1288	0.15326	0.153946	0.151002
1289	0.149426	0.158412	0.159566		1289	0.152096	0.155484	0.152688
1290	0.148685	0.158366	0.157684		1290	0.152272	0.153053	0.153885
1291	0.150035	0.159118	0.156057		1291	0.152848	0.151503	0.153879
1292	0.148317	0.158093	0.154132		1292	0.154434	0.152139	0.15719
1293	0.149207	0.158814	0.155421		1293	0.153688	0.155008	0.154972
1294	0.149841	0.159338	0.155994		1294	0.154102	0.155743	0.154423
1295	0.150059	0.16015	0.157318		1295	0.153608	0.156113	0.155045
1296	0.148981	0.15902	0.156891		1296	0.152485	0.156234	0.155446
1297	0.149949	0.160137	0.157251		1297	0.152449	0.156552	0.14968
1298	0.150368	0.15845	0.155948		1298	0.152347	0.154701	0.148357
1299	0.150868	0.157283	0.155354		1299	0.154725	0.15595	0.1489
1300	0.14984	0.156129	0.155929		1300	0.155651	0.15616	0.148696
1301	0.149303	0.157362	0.15523		1301	0.156059	0.156898	0.148475
1302	0.149736	0.156204	0.157494		1302	0.155549	0.157759	0.152138
1303	0.149525	0.157952	0.158375		1303	0.155729	0.157579	0.15273
1304	0.148346	0.159077	0.159393		1304	0.152777	0.156014	0.153385
1305	0.148901	0.159254	0.15665		1305	0.15259	0.157233	0.152358
1306	0.148369	0.159493	0.15781		1306	0.1529	0.157085	0.151627
1307	0.148053	0.160757	0.155691		1307	0.152719	0.157004	0.15106
1308	0.147936	0.159592	0.156056		1308	0.151208	0.158042	0.150992
1309	0.14873	0.15864	0.157027		1309	0.153151	0.158534	0.148907
1310	0.147985	0.157454	0.159277		1310	0.15319	0.159883	0.148438
1311	0.149805	0.158352	0.158557		1311	0.153496	0.160394	0.147002
1312	0.149525	0.157519	0.158324		1312	0.154254	0.15973	0.144465
1313	0.14842	0.156948	0.157305		1313	0.154836	0.160355	0.145867
1314	0.147979	0.156724	0.156559		1314	0.153123	0.158333	0.148178
1315	0.148386	0.157963	0.156944		1315	0.151938	0.157025	0.149828
1316	0.148079	0.155363	0.156628		1316	0.150955	0.157184	0.153397
1317	0.147235	0.156405	0.157166		1317	0.150578	0.157827	0.15421
1318	0.147659	0.156598	0.1571		1318	0.15009	0.157329	0.151689
1319	0.146965	0.158311	0.157582		1319	0.150924	0.156612	0.149921
1320	0.147766	0.156273	0.155792		1320	0.151935	0.153734	0.150322
1321	0.14711	0.156995	0.156216		1321	0.152397	0.150446	0.147216
1322	0.147425	0.155531	0.155141		1322	0.152535	0.150866	0.14923
1323	0.14797	0.155968	0.154874		1323	0.152313	0.150035	0.149588
1324	0.148523	0.154528	0.153629		1324	0.152669	0.151137	0.15085
1325	0.14796	0.15587	0.153279		1325	0.15262	0.152484	0.148898
1326	0.14685	0.155184	0.154721		1326	0.152661	0.154787	0.151253
1327	0.147174	0.155247	0.154508		1327	0.151181	0.157028	0.151008
1328	0.145996	0.155147	0.155251		1328	0.152401	0.157646	0.154501
1329	0.145796	0.156245	0.155746		1329	0.152029	0.158165	0.155725
1330	0.146165	0.155942	0.156639		1330	0.152407	0.158864	0.157846
1331	0.14695	0.156375	0.15477		1331	0.150967	0.161253	0.156247
1332	0.14698	0.15548	0.154562		1332	0.151288	0.158912	0.154406
1333	0.147875	0.154861	0.154351		1333	0.150221	0.157963	0.154548
1334	0.148324	0.153554	0.15367		1334	0.149528	0.1567	0.152633
1335	0.147176	0.154315	0.153318		1335	0.149062	0.154624	0.152728
1336	0.146984	0.15501	0.153785		1336	0.150699	0.152315	0.152576
1337	0.145759	0.155621	0.154997		1337	0.149696	0.149964	0.152867
1338	0.144704	0.156927	0.154763		1338	0.150648	0.149219	0.150311
1339	0.145127	0.157173	0.153843		1339	0.151139	0.151385	0.152182
1340	0.144395	0.156803	0.15319		1340	0.151258	0.150119	0.152516
1341	0.143595	0.15669	0.154282		1341	0.149413	0.150069	0.152251
1342	0.144131	0.156678	0.153085		1342	0.152371	0.150037	0.152923
1343	0.144538	0.15595	0.152777		1343	0.151155	0.150503	0.152889
1344	0.143288	0.156789	0.153502		1344	0.150518	0.150322	0.150438
1345	0.144481	0.155529	0.155016		1345	0.149523	0.153339	0.149023
1346	0.145504	0.154028	0.153256		1346	0.150506	0.153113	0.150004
1347	0.145728	0.154677	0.154461		1347	0.148809	0.152317	0.15129
1348	0.146415	0.155636	0.15461		1348	0.149037	0.152285	0.149967
1349	0.145793	0.154218	0.156032		1349	0.148318	0.152941	0.15098
1350	0.147163	0.155587	0.157247		1350	0.149132	0.152312	0.150808
1351	0.146061	0.156667	0.157902		1351	0.149561	0.151463	0.151326
1352	0.147315	0.156255	0.158987		1352	0.14959	0.152773	0.14954
1353	0.147034	0.15554	0.159161		1353	0.149549	0.154234	0.14797
1354	0.148891	0.156019	0.158444		1354	0.151077	0.153901	0.148395
1355	0.147396	0.156549	0.155783		1355	0.150787	0.154541	0.148948
1356	0.148618	0.156583	0.155876		1356	0.149584	0.153667	0.149582
1357	0.146873	0.156469	0.153725		1357	0.147887	0.155416	0.150592
1358	0.146724	0.154665	0.153287		1358	0.147864	0.155842	0.153316
1359	0.145935	0.155553	0.152724		1359	0.148174	0.153016	0.154192
1360	0.146004	0.154876	0.15317		1360	0.147976	0.153879	0.15523
1361	0.145361	0.154851	0.153473		1361	0.148393	0.15567	0.154983
1362	0.145765	0.154693	0.153579		1362	0.149844	0.153568	0.15254
1363	0.146157	0.155688	0.15471		1363	0.150045	0.152191	0.151418
1364	0.147431	0.155238	0.155353		1364	0.149408	0.154372	0.149204
1365	0.147198	0.155036	0.1557		1365	0.149587	0.152433	0.147635
1366	0.148194	0.154918	0.15572		1366	0.148929	0.152183	0.146969
1367	0.149082	0.154996	0.156348		1367	0.149908	0.15203	0.147986
1368	0.148685	0.155701	0.155772		1368	0.149099	0.152998	0.151899
1369	0.147185	0.154761	0.155316		1369	0.14865	0.154076	0.152195
1370	0.14686	0.156341	0.154945		1370	0.147949	0.155073	0.1524
1371	0.145073	0.156228	0.154396		1371	0.146574	0.154729	0.151258
1372	0.144524	0.155014	0.154225		1372	0.145185	0.158326	0.154071
1373	0.144962	0.153903	0.154272		1373	0.146079	0.157171	0.151362
1374	0.14613	0.154519	0.152593		1374	0.145085	0.157604	0.150887
1375	0.145351	0.153206	0.152561		1375	0.145056	0.156597	0.151011
1376	0.146366	0.15279	0.151175		1376	0.147592	0.156253	0.153644
1377	0.146432	0.152656	0.150782		1377	0.146571	0.153335	0.152336
1378	0.145538	0.152528	0.14991		1378	0.145809	0.151276	0.152063
1379	0.144337	0.153426	0.151346		1379	0.148171	0.148959	0.154966
1380	0.144903	0.154146	0.150711		1380	0.148637	0.14931	0.157311
1381	0.144803	0.153527	0.151204		1381	0.147988	0.150241	0.155338
1382	0.144629	0.155204	0.151165		1382	0.148499	0.149566	0.154605
1383	0.144336	0.15533	0.151002		1383	0.14877	0.149764	0.152436
1384	0.144135	0.155072	0.151499		1384	0.147084	0.149109	0.149003
1385	0.144003	0.154144	0.150752		1385	0.147252	0.147713	0.146948
1386	0.14418	0.154154	0.151398		1386	0.146889	0.145949	0.148467
1387	0.143765	0.154885	0.15045		1387	0.146294	0.147486	0.146967
1388	0.143934	0.154696	0.149553		1388	0.146432	0.149056	0.149129
1389	0.144441	0.153793	0.150014		1389	0.146686	0.149234	0.149918
1390	0.146748	0.154821	0.150322		1390	0.147162	0.150237	0.149747
1391	0.145228	0.155721	0.15242		1391	0.14839	0.150007	0.148112
1392	0.145759	0.153847	0.154352		1392	0.149297	0.148777	0.147772
1393	0.14654	0.154428	0.155407		1393	0.149078	0.147413	0.14798
1394	0.146022	0.154008	0.153113		1394	0.14896	0.146803	0.147925
1395	0.145245	0.15299	0.155235		1395	0.147869	0.14668	0.147421
1396	0.147253	0.153178	0.153476		1396	0.145141	0.146897	0.146332
1397	0.146509	0.15338	0.152337		1397	0.145127	0.146183	0.149041
1398	0.14685	0.153401	0.152302		1398	0.144663	0.147036	0.150076
1399	0.14747	0.155657	0.153674		1399	0.144655	0.147642	0.152172
1400	0.146994	0.155463	0.153068		1400	0.144839	0.147565	0.149882
1401	0.145756	0.15543	0.152422		1401	0.147575	0.149572	0.150516
1402	0.14517	0.155751	0.151807		1402	0.147373	0.152402	0.14963
1403	0.144144	0.155965	0.151635		1403	0.147419	0.152752	0.148482
1404	0.143691	0.153701	0.151122		1404	0.146394	0.152072	0.144678
1405	0.142635	0.153451	0.15084		1405	0.145883	0.154	0.147727
1406	0.142652	0.153544	0.149289		1406	0.144829	0.153521	0.146651
1407	0.142815	0.152447	0.148655		1407	0.145131	0.15166	0.146976
1408	0.142943	0.152134	0.148295		1408	0.145775	0.151177	0.143347
1409	0.143149	0.152118	0.148454		1409	0.146385	0.151875	0.146864
1410	0.143757	0.152853	0.148698		1410	0.145949	0.150392	0.146607
1411	0.143678	0.152667	0.150965		1411	0.145621	0.150889	0.150876
1412	0.144584	0.15365	0.151137		1412	0.145517	0.151932	0.148669
1413	0.145071	0.153363	0.151143		1413	0.144836	0.150942	0.151534
1414	0.144865	0.153147	0.150388		1414	0.144567	0.149817	0.148866
1415	0.144188	0.154038	0.151519		1415	0.145511	0.150674	0.148756
1416	0.14382	0.153287	0.151079		1416	0.145792	0.14928	0.144679
1417	0.143642	0.154317	0.152139		1417	0.146272	0.147288	0.14593
1418	0.143058	0.153966	0.153937		1418	0.146184	0.146624	0.146079
1419	0.142211	0.155173	0.153964		1419	0.146813	0.147974	0.148066
1420	0.142607	0.154492	0.151729		1420	0.145974	0.14641	0.146908
1421	0.142607	0.15566	0.151469		1421	0.145394	0.148136	0.146991
1422	0.142778	0.15457	0.150621		1422	0.144032	0.149199	0.144665
1423	0.142642	0.154073	0.148787		1423	0.144051	0.151866	0.146289
1424	0.143767	0.154144	0.149518		1424	0.143785	0.152753	0.142929
1425	0.144816	0.153377	0.149704		1425	0.144183	0.152041	0.145653
1426	0.145312	0.153008	0.14993		1426	0.1452	0.150866	0.146383
1427	0.145274	0.153237	0.151617		1427	0.145422	0.149811	0.148811
1428	0.144965	0.154654	0.151677		1428	0.144451	0.147979	0.146856
1429	0.144797	0.15445	0.151848		1429	0.143381	0.146566	0.147408
1430	0.143574	0.154637	0.152385		1430	0.1431	0.147813	0.145413
1431	0.143915	0.153717	0.15357		1431	0.142742	0.146678	0.144555
1432	0.144421	0.153171	0.151985		1432	0.142524	0.145618	0.145013
1433	0.144136	0.153091	0.151991		1433	0.143923	0.146479	0.144908
1434	0.144372	0.153564	0.151592		1434	0.146335	0.14589	0.146165
1435	0.145179	0.154147	0.152197		1435	0.146356	0.146339	0.145895
1436	0.14588	0.156539	0.150467		1436	0.145008	0.146243	0.146712
1437	0.145386	0.157529	0.151651		1437	0.14601	0.147792	0.147393
1438	0.146045	0.156481	0.153445		1438	0.144978	0.146612	0.148782
1439	0.145447	0.155326	0.153733		1439	0.14257	0.148148	0.150507
1440	0.145318	0.154834	0.153043		1440	0.141966	0.148803	0.148372
1441	0.145439	0.1546	0.152553		1441	0.143809	0.147898	0.149395
1442	0.145848	0.155193	0.151173		1442	0.142747	0.148075	0.150477
1443	0.145636	0.155733	0.150361		1443	0.143589	0.150353	0.151994
1444	0.145237	0.156484	0.150461		1444	0.143859	0.148034	0.1517
1445	0.144783	0.156526	0.150137		1445	0.144459	0.145912	0.153354
1446	0.14348	0.15533	0.151294		1446	0.142272	0.148798	0.153955
1447	0.142331	0.154091	0.151697		1447	0.143044	0.14946	0.150547
1448	0.141561	0.153707	0.150838		1448	0.143222	0.149285	0.150203
1449	0.142188	0.153614	0.150729		1449	0.143678	0.149876	0.147611
1450	0.142253	0.152786	0.151909		1450	0.144155	0.151888	0.149329
1451	0.142601	0.152929	0.152341		1451	0.144744	0.15094	0.148271
1452	0.142588	0.153022	0.152528		1452	0.142495	0.150301	0.151337
1453	0.143488	0.153171	0.152748		1453	0.142211	0.148109	0.147763
1454	0.14248	0.153806	0.153079		1454	0.141151	0.148358	0.147867
1455	0.142213	0.155273	0.151349		1455	0.138988	0.146099	0.147761
1456	0.14264	0.155234	0.150584		1456	0.140248	0.145291	0.148852
1457	0.142663	0.154549	0.151017		1457	0.142089	0.14424	0.147513
1458	0.142848	0.155655	0.150798		1458	0.142436	0.143977	0.14983
1459	0.143872	0.155224	0.150159		1459	0.14327	0.144288	0.152806
1460	0.14476	0.155163	0.150921		1460	0.143404	0.14349	0.151625
1461	0.145252	0.154383	0.151406		1461	0.142995	0.144895	0.149506
1462	0.145083	0.15348	0.151375		1462	0.142324	0.14476	0.149531
1463	0.144946	0.152899	0.152394		1463	0.142651	0.146239	0.148197
1464	0.144629	0.152899	0.152232		1464	0.14258	0.145738	0.146889
1465	0.143904	0.153563	0.151041		1465	0.144701	0.147766	0.147368
1466	0.142863	0.153869	0.151393		1466	0.143899	0.145084	0.147962
1467	0.142729	0.155568	0.151464		1467	0.145229	0.14539	0.147014
1468	0.141928	0.155429	0.150909		1468	0.144396	0.144223	0.147912
1469	0.141384	0.153288	0.15109		1469	0.144836	0.14602	0.146814
1470	0.141899	0.152612	0.153153		1470	0.143688	0.146536	0.146019
1471	0.142537	0.152008	0.151353		1471	0.144943	0.148323	0.145295
1472	0.14329	0.150437	0.150347		1472	0.143872	0.14833	0.146247
1473	0.144155	0.149658	0.149423		1473	0.142938	0.148205	0.14685
1474	0.14599	0.152426	0.150342		1474	0.142688	0.146472	0.14842
1475	0.144961	0.15224	0.147829		1475	0.143895	0.145438	0.149693
1476	0.144438	0.153375	0.149531		1476	0.14303	0.144267	0.151158
1477	0.144498	0.154472	0.149624		1477	0.142553	0.147554	0.15048
1478	0.144897	0.155494	0.148233		1478	0.143794	0.147859	0.149163
1479	0.143771	0.152823	0.147112		1479	0.144402	0.147233	0.149518
1480	0.144062	0.152585	0.148346		1480	0.143392	0.147033	0.149157
1481	0.143845	0.152283	0.148072		1481	0.144098	0.145979	0.14893
1482	0.14253	0.152433	0.147527		1482	0.144602	0.141951	0.149974
1483	0.140969	0.151121	0.149798		1483	0.145312	0.141001	0.150526
1484	0.140229	0.152216	0.149196		1484	0.143952	0.141066	0.150984
1485	0.139542	0.152217	0.14796		1485	0.142836	0.141259	0.152372
1486	0.138762	0.153475	0.147242		1486	0.142192	0.143332	0.152288
1487	0.140304	0.154665	0.148557		1487	0.142921	0.14281	0.151946
1488	0.141018	0.155673	0.148508		1488	0.140616	0.141882	0.153268
1489	0.141205	0.156476	0.149722		1489	0.140503	0.141939	0.15237
1490	0.141752	0.156319	0.149484		1490	0.140794	0.142611	0.152401
1491	0.141741	0.153879	0.149632		1491	0.14015	0.141615	0.151242
1492	0.140682	0.151618	0.148512		1492	0.139629	0.14045	0.151941
1493	0.139708	0.15269	0.147375		1493	0.140434	0.142285	0.151453
1494	0.139586	0.152423	0.147015		1494	0.140952	0.142925	0.150078
1495	0.141088	0.15235	0.147432		1495	0.141837	0.142884	0.149332
1496	0.141192	0.152607	0.147516		1496	0.142366	0.141926	0.150613
1497	0.142598	0.154117	0.148648		1497	0.14239	0.14781	0.150053
1498	0.143558	0.153652	0.150138		1498	0.143249	0.147751	0.149546
1499	0.143609	0.152954	0.150629		1499	0.143812	0.146509	0.149892
1500	0.142228	0.15317	0.151314		1500	0.144311	0.145035	0.150846

## Sheet: graph
Figure 3-figure supplement 2B
TG-induced response (ΔF340/F380)
Vehicle	300 nM CNP
0.0391845	0.0369447
0.0365016	0.0419823
0.0474566	0.0396146
0.043586	0.0444227
