# Supplementary material for: C-type natriuretic peptide facilitates autonomic Ca2+ entry in growth plate chondrocytes for stimulating bone growth
Source: eLife. 2022 Mar 15;11:e71931. doi: 10.7554/eLife.71931 (PMC8923661; doi:10.7554/eLife.71931)
Supplement: Figure 3—source data 1. [file elife-71931-fig3-data1.xlsx]

## Sheet: trace
Figure 3A
Paxilline (10 mM)
Vehicle					CNP (300 nM)
Times (s)	Cell1	Cell2	Cell3		Times (s)	Cell1	Cell2	Cell3
0	0.187377	0.226188	0.182897		0	0.171912	0.204004	0.210631
1	0.186189	0.22767	0.179404		1	0.171283	0.203625	0.210436
2	0.187365	0.227765	0.178842		2	0.170347	0.204819	0.207578
3	0.186803	0.227604	0.178734		3	0.171066	0.204465	0.206828
4	0.186177	0.228741	0.178923		4	0.171442	0.208205	0.205926
5	0.187086	0.22897	0.177284		5	0.169722	0.209305	0.203554
6	0.188678	0.228162	0.178725		6	0.169041	0.213459	0.203043
7	0.187666	0.230086	0.178366		7	0.169234	0.213502	0.204211
8	0.187538	0.2295	0.178426		8	0.168027	0.214478	0.202602
9	0.188994	0.231043	0.177569		9	0.167056	0.214192	0.204703
10	0.18549	0.230991	0.177762		10	0.167711	0.215904	0.205685
11	0.183978	0.231028	0.176725		11	0.168949	0.213189	0.205178
12	0.184438	0.230395	0.179235		12	0.169962	0.21634	0.203475
13	0.184208	0.232151	0.181484		13	0.170447	0.218377	0.203944
14	0.18365	0.231197	0.181614		14	0.172154	0.220338	0.203964
15	0.184206	0.231401	0.180825		15	0.172684	0.219127	0.203064
16	0.186516	0.232554	0.18206		16	0.172806	0.219879	0.201624
17	0.185195	0.232014	0.17852		17	0.172772	0.218808	0.201818
18	0.186405	0.231063	0.177962		18	0.171629	0.218604	0.202198
19	0.18709	0.231501	0.177295		19	0.170652	0.216377	0.198505
20	0.187693	0.230324	0.175926		20	0.172384	0.21759	0.199623
21	0.187745	0.230057	0.176087		21	0.173022	0.217416	0.200443
22	0.189993	0.229745	0.178553		22	0.172619	0.215369	0.201731
23	0.189298	0.228799	0.178335		23	0.173733	0.211546	0.201746
24	0.189865	0.229125	0.180447		24	0.174128	0.211133	0.202646
25	0.192453	0.228816	0.183533		25	0.173056	0.20672	0.202563
26	0.190331	0.229049	0.184311		26	0.172249	0.204845	0.203381
27	0.188829	0.229361	0.182158		27	0.173959	0.205304	0.200937
28	0.189295	0.229677	0.181955		28	0.174773	0.207129	0.201045
29	0.191172	0.228946	0.181779		29	0.176226	0.206111	0.201869
30	0.189165	0.229995	0.180337		30	0.176171	0.206827	0.201432
31	0.191276	0.230033	0.178777		31	0.177565	0.205275	0.200625
32	0.193367	0.228873	0.180941		32	0.176612	0.203998	0.20204
33	0.193441	0.230125	0.179793		33	0.176469	0.2012	0.20026
34	0.19169	0.229297	0.178529		34	0.177213	0.201577	0.201696
35	0.191152	0.228333	0.179489		35	0.17716	0.199899	0.20136
36	0.189998	0.228181	0.180822		36	0.176059	0.201088	0.201345
37	0.187974	0.228778	0.177866		37	0.17683	0.200307	0.202251
38	0.188842	0.226914	0.178873		38	0.17789	0.201128	0.203295
39	0.188086	0.226164	0.177908		39	0.177413	0.197468	0.20216
40	0.188801	0.225046	0.177169		40	0.178143	0.197919	0.202968
41	0.190873	0.22419	0.174874		41	0.179407	0.198189	0.203214
42	0.192791	0.225631	0.17467		42	0.181229	0.19658	0.200991
43	0.192318	0.225231	0.173325		43	0.181493	0.194112	0.202281
44	0.192753	0.226533	0.173484		44	0.182527	0.194652	0.200979
45	0.193689	0.227565	0.173582		45	0.183451	0.19227	0.200013
46	0.194762	0.227907	0.173765		46	0.184178	0.190038	0.199097
47	0.195881	0.225773	0.174583		47	0.182824	0.188662	0.19964
48	0.198004	0.227585	0.175459		48	0.181843	0.190301	0.196395
49	0.199566	0.227201	0.176304		49	0.182243	0.19161	0.198316
50	0.198761	0.227077	0.175953		50	0.183157	0.194717	0.198433
51	0.196213	0.227487	0.175691		51	0.184171	0.194776	0.199611
52	0.196014	0.227052	0.177555		52	0.184774	0.197395	0.19978
53	0.19463	0.22702	0.177191		53	0.186915	0.195298	0.202333
54	0.193378	0.226502	0.177968		54	0.18736	0.194114	0.1992
55	0.194428	0.224581	0.177363		55	0.188113	0.191692	0.198048
56	0.194672	0.223783	0.178615		56	0.187072	0.190105	0.19628
57	0.194055	0.223895	0.178438		57	0.188076	0.191507	0.195723
58	0.193844	0.2206	0.176985		58	0.189142	0.192938	0.192544
59	0.193836	0.220738	0.175473		59	0.189461	0.195715	0.193864
60	0.194741	0.221688	0.174684		60	0.188275	0.198039	0.192206
61	0.196369	0.222234	0.174154		61	0.18922	0.200421	0.190255
62	0.195824	0.223004	0.172543		62	0.189513	0.198361	0.188027
63	0.196058	0.224687	0.173565		63	0.187791	0.199905	0.187376
64	0.19672	0.223889	0.173817		64	0.188891	0.199436	0.186517
65	0.197825	0.222862	0.172757		65	0.190418	0.199324	0.187214
66	0.198207	0.221291	0.171162		66	0.191616	0.20165	0.188231
67	0.198429	0.219115	0.17138		67	0.192954	0.199871	0.188366
68	0.199598	0.218514	0.170254		68	0.194698	0.199349	0.187109
69	0.200519	0.218392	0.170147		69	0.194816	0.201309	0.185294
70	0.198397	0.218906	0.173002		70	0.195734	0.202316	0.185031
71	0.197272	0.218318	0.17415		71	0.196779	0.201503	0.184984
72	0.198025	0.219406	0.173046		72	0.195773	0.204839	0.184809
73	0.197681	0.218967	0.173841		73	0.196124	0.20424	0.186238
74	0.202048	0.219883	0.173892		74	0.197364	0.199847	0.185571
75	0.203843	0.218711	0.171351		75	0.198951	0.199789	0.183539
76	0.205587	0.217402	0.169956		76	0.200361	0.200344	0.182125
77	0.205863	0.215923	0.171815		77	0.20216	0.201547	0.181536
78	0.207428	0.215845	0.173961		78	0.20566	0.20195	0.180514
79	0.202907	0.214558	0.172813		79	0.205539	0.203696	0.182003
80	0.201561	0.21672	0.173413		80	0.204663	0.205835	0.183217
81	0.19969	0.218448	0.175695		81	0.203819	0.204803	0.184078
82	0.197032	0.220097	0.176275		82	0.204719	0.203724	0.183964
83	0.195492	0.220114	0.175229		83	0.203115	0.204315	0.185799
84	0.196456	0.220559	0.175231		84	0.202635	0.206953	0.183648
85	0.196595	0.220152	0.178303		85	0.202818	0.206555	0.182126
86	0.196306	0.220675	0.177215		86	0.202825	0.207904	0.181959
87	0.198877	0.219435	0.176561		87	0.203043	0.206135	0.181812
88	0.199845	0.221759	0.175802		88	0.203262	0.205816	0.179983
89	0.199569	0.220474	0.178124		89	0.203828	0.205313	0.179309
90	0.203162	0.219247	0.175884		90	0.205745	0.203244	0.179862
91	0.205168	0.219821	0.175249		91	0.208347	0.201863	0.178827
92	0.204862	0.220496	0.175023		92	0.208503	0.205147	0.179413
93	0.205776	0.217717	0.175116		93	0.208851	0.206632	0.180958
94	0.208817	0.217234	0.171711		94	0.210146	0.205842	0.185018
95	0.206647	0.218487	0.170973		95	0.208356	0.205309	0.188873
96	0.206512	0.217551	0.172228		96	0.206279	0.206599	0.192093
97	0.209771	0.217717	0.17211		97	0.207297	0.205104	0.196138
98	0.210408	0.217823	0.172626		98	0.205884	0.205934	0.200112
99	0.211789	0.219566	0.174776		99	0.206746	0.207298	0.201455
100	0.214778	0.219185	0.175278		100	0.206066	0.205251	0.202987
101	0.215521	0.220387	0.175119		101	0.205771	0.205	0.204897
102	0.21341	0.220805	0.176691		102	0.202632	0.203576	0.20617
103	0.214383	0.223127	0.177372		103	0.202596	0.202627	0.207007
104	0.215561	0.223381	0.177241		104	0.200008	0.201031	0.208925
105	0.21669	0.224875	0.178586		105	0.19906	0.205118	0.211641
106	0.216601	0.225915	0.178173		106	0.199424	0.204345	0.212667
107	0.221177	0.227124	0.176345		107	0.200055	0.204725	0.214861
108	0.222084	0.228072	0.174312		108	0.198995	0.206186	0.215975
109	0.219282	0.230664	0.174105		109	0.199989	0.203209	0.216696
110	0.217646	0.231216	0.173683		110	0.200992	0.198855	0.216236
111	0.221197	0.232102	0.173734		111	0.199061	0.197553	0.217336
112	0.21824	0.234161	0.17344		112	0.197217	0.195866	0.219812
113	0.217549	0.233627	0.1751		113	0.198713	0.192411	0.222859
114	0.214672	0.233443	0.175133		114	0.196856	0.193783	0.225997
115	0.213506	0.234991	0.17671		115	0.195487	0.19728	0.227616
116	0.21377	0.234347	0.177619		116	0.195013	0.197598	0.229109
117	0.214721	0.234224	0.178814		117	0.195902	0.199407	0.229672
118	0.213707	0.234927	0.179468		118	0.19392	0.200907	0.227218
119	0.21724	0.235601	0.181011		119	0.194345	0.201041	0.226268
120	0.216637	0.234572	0.179726		120	0.193737	0.199393	0.228417
121	0.214277	0.236463	0.181346		121	0.192783	0.197816	0.229379
122	0.214255	0.237245	0.181165		122	0.191128	0.199002	0.225361
123	0.213538	0.237096	0.181236		123	0.189198	0.197203	0.227535
124	0.212431	0.237417	0.180524		124	0.18756	0.195876	0.229404
125	0.214234	0.238142	0.179283		125	0.187028	0.197965	0.226722
126	0.21219	0.235943	0.179394		126	0.186148	0.199931	0.227779
127	0.209783	0.234028	0.179713		127	0.185559	0.200392	0.231147
128	0.211123	0.233744	0.178803		128	0.185896	0.202607	0.230895
129	0.21054	0.234279	0.18044		129	0.185334	0.203149	0.233057
130	0.20886	0.236999	0.181745		130	0.184033	0.20309	0.234769
131	0.208122	0.239694	0.181454		131	0.184172	0.201689	0.237571
132	0.209222	0.241603	0.181273		132	0.183999	0.196821	0.240889
133	0.207241	0.245159	0.182438		133	0.183195	0.194327	0.241783
134	0.204789	0.245744	0.181539		134	0.182802	0.194363	0.240337
135	0.205562	0.244952	0.182089		135	0.18446	0.192957	0.239481
136	0.204646	0.244915	0.181523		136	0.184474	0.194907	0.23547
137	0.203686	0.244707	0.183665		137	0.187041	0.195738	0.231796
138	0.203819	0.243986	0.18166		138	0.189454	0.195919	0.229222
139	0.205525	0.243203	0.18144		139	0.192363	0.195509	0.228487
140	0.204478	0.244118	0.182141		140	0.192809	0.192085	0.228659
141	0.206545	0.244141	0.18146		141	0.195887	0.189796	0.230943
142	0.206259	0.245709	0.182188		142	0.196211	0.189518	0.230319
143	0.206153	0.245653	0.18423		143	0.198489	0.186844	0.232259
144	0.20659	0.248172	0.184737		144	0.201245	0.187248	0.231403
145	0.207617	0.24841	0.18545		145	0.205276	0.191696	0.234681
146	0.208539	0.248653	0.188362		146	0.206865	0.191627	0.235366
147	0.208836	0.249354	0.1859		147	0.209093	0.1922	0.235277
148	0.20932	0.249374	0.186392		148	0.2116	0.19288	0.235438
149	0.208613	0.24675	0.185774		149	0.21081	0.192216	0.236611
150	0.208202	0.245255	0.184241		150	0.212487	0.191213	0.233668
151	0.207805	0.245054	0.18282		151	0.214018	0.190843	0.231335
152	0.206721	0.244649	0.184767		152	0.215748	0.189799	0.231709
153	0.208557	0.245252	0.184374		153	0.216052	0.192892	0.229696
154	0.206457	0.246405	0.186279		154	0.218976	0.192573	0.228122
155	0.204887	0.247151	0.18567		155	0.218692	0.190067	0.226161
156	0.202795	0.24941	0.185376		156	0.220229	0.192528	0.224999
157	0.202964	0.249298	0.184697		157	0.220694	0.193874	0.224318
158	0.200231	0.249534	0.184381		158	0.220191	0.193543	0.227091
159	0.201796	0.250515	0.182157		159	0.217377	0.195042	0.224523
160	0.202616	0.249988	0.183441		160	0.21675	0.197583	0.224369
161	0.203478	0.247335	0.183229		161	0.216692	0.194552	0.222723
162	0.204908	0.248027	0.18331		162	0.216435	0.193714	0.222089
163	0.203499	0.247984	0.184715		163	0.215577	0.190227	0.218329
164	0.206361	0.248234	0.186903		164	0.216965	0.189543	0.218808
165	0.206245	0.249202	0.186602		165	0.216775	0.187308	0.219591
166	0.206679	0.249616	0.185578		166	0.21358	0.188612	0.221171
167	0.205928	0.249532	0.185378		167	0.214393	0.193042	0.224
168	0.205894	0.249004	0.185186		168	0.214067	0.1971	0.22595
169	0.204121	0.246979	0.184302		169	0.213247	0.196209	0.227391
170	0.20561	0.247635	0.184142		170	0.210537	0.199449	0.228537
171	0.20433	0.249279	0.184895		171	0.210932	0.201586	0.228993
172	0.204094	0.249177	0.184425		172	0.207003	0.198788	0.228413
173	0.20642	0.250063	0.183402		173	0.204697	0.197801	0.2286
174	0.205358	0.251919	0.181849		174	0.202719	0.199473	0.230464
175	0.201998	0.25155	0.183334		175	0.202824	0.198117	0.230701
176	0.201535	0.25097	0.182238		176	0.201579	0.194117	0.234336
177	0.20266	0.251118	0.181357		177	0.200665	0.195269	0.236583
178	0.202124	0.250971	0.181		178	0.202204	0.193467	0.240238
179	0.202219	0.250943	0.183073		179	0.20189	0.190867	0.242745
180	0.205026	0.252248	0.182058		180	0.201663	0.190633	0.247677
181	0.207855	0.253696	0.182658		181	0.200412	0.192316	0.247893
182	0.206737	0.255806	0.18336		182	0.200313	0.191753	0.250431
183	0.207118	0.256279	0.182959		183	0.197051	0.193163	0.251497
184	0.206445	0.258524	0.182127		184	0.195822	0.196985	0.254779
185	0.204587	0.257729	0.181199		185	0.195234	0.200787	0.256099
186	0.20292	0.257553	0.182517		186	0.194391	0.204344	0.257578
187	0.20535	0.255228	0.181392		187	0.1937	0.209034	0.259161
188	0.204284	0.25617	0.181059		188	0.192966	0.21421	0.263029
189	0.205978	0.255104	0.18133		189	0.190945	0.217395	0.264378
190	0.207287	0.253362	0.181706		190	0.18883	0.21627	0.263552
191	0.207702	0.252485	0.180184		191	0.187021	0.219353	0.267898
192	0.207516	0.251218	0.181132		192	0.184412	0.216507	0.270035
193	0.210971	0.249452	0.182826		193	0.182747	0.21454	0.270739
194	0.211422	0.246862	0.185012		194	0.181998	0.217022	0.273133
195	0.212337	0.249578	0.186418		195	0.17902	0.221696	0.274513
196	0.214969	0.247762	0.188701		196	0.17714	0.223394	0.273184
197	0.214261	0.247559	0.187451		197	0.176246	0.225514	0.274076
198	0.215115	0.247687	0.185877		198	0.176284	0.229679	0.275654
199	0.216979	0.247271	0.183847		199	0.175662	0.229813	0.271624
200	0.217343	0.243462	0.183761		200	0.175936	0.228424	0.275147
201	0.216552	0.244065	0.184439		201	0.1769	0.228517	0.275245
202	0.21557	0.242305	0.188891		202	0.176271	0.230801	0.271209
203	0.212415	0.238354	0.190786		203	0.176819	0.234681	0.270173
204	0.212048	0.238219	0.191203		204	0.176651	0.237807	0.273797
205	0.211341	0.237151	0.189766		205	0.177888	0.240815	0.2719
206	0.212572	0.234774	0.18872		206	0.176482	0.248558	0.273708
207	0.21347	0.235374	0.186013		207	0.177423	0.251228	0.278855
208	0.212793	0.237164	0.18714		208	0.176635	0.249295	0.27637
209	0.211301	0.23643	0.18591		209	0.175763	0.251572	0.275518
210	0.209609	0.237861	0.186503		210	0.17491	0.254403	0.277742
211	0.206625	0.23795	0.187251		211	0.175246	0.252252	0.276619
212	0.206923	0.237974	0.188043		212	0.173377	0.255892	0.274878
213	0.208042	0.238522	0.185314		213	0.172438	0.261209	0.277123
214	0.20715	0.238329	0.186375		214	0.172652	0.261989	0.277171
215	0.207656	0.237764	0.1874		215	0.172073	0.265585	0.278294
216	0.207415	0.238542	0.184714		216	0.172099	0.265662	0.27865
217	0.20438	0.238395	0.183442		217	0.172766	0.264415	0.281408
218	0.202001	0.239089	0.184143		218	0.171288	0.262303	0.280408
219	0.200352	0.239749	0.182298		219	0.169741	0.260337	0.281734
220	0.19894	0.240248	0.180442		220	0.168277	0.257969	0.27638
221	0.197321	0.238065	0.180625		221	0.1667	0.255543	0.274475
222	0.199878	0.236633	0.180607		222	0.166254	0.254015	0.269214
223	0.201625	0.235339	0.180175		223	0.167264	0.253521	0.267992
224	0.202159	0.23374	0.182199		224	0.168301	0.25056	0.265738
225	0.203337	0.232364	0.184646		225	0.168937	0.246501	0.265257
226	0.20404	0.233048	0.185611		226	0.169108	0.246311	0.264691
227	0.201696	0.233602	0.186671		227	0.169025	0.246548	0.263982
228	0.201258	0.23145	0.18671		228	0.16841	0.24278	0.262061
229	0.202434	0.23068	0.186336		229	0.166908	0.244506	0.260305
230	0.202517	0.230345	0.185231		230	0.166196	0.244553	0.258021
231	0.201845	0.23161	0.184479		231	0.167125	0.239267	0.259786
232	0.202045	0.230726	0.183667		232	0.167158	0.236567	0.260222
233	0.200344	0.230879	0.184731		233	0.166725	0.23644	0.260841
234	0.200095	0.231155	0.184803		234	0.166956	0.232438	0.259214
235	0.199868	0.22918	0.184365		235	0.166857	0.229929	0.258587
236	0.202372	0.228829	0.185117		236	0.166634	0.230795	0.255422
237	0.202405	0.229472	0.185215		237	0.165497	0.227501	0.254571
238	0.204018	0.231065	0.185415		238	0.164853	0.225599	0.254374
239	0.203873	0.230689	0.184579		239	0.16412	0.223346	0.255659
240	0.202852	0.233549	0.184756		240	0.16464	0.223637	0.258422
241	0.201753	0.232284	0.1849		241	0.162219	0.224246	0.25902
242	0.202709	0.231198	0.184766		242	0.162848	0.225699	0.261788
243	0.203423	0.22915	0.183938		243	0.164483	0.224851	0.262416
244	0.203614	0.229795	0.184642		244	0.164229	0.226837	0.263945
245	0.205604	0.228056	0.18366		245	0.16425	0.225385	0.265245
246	0.203948	0.226457	0.182114		246	0.16626	0.225822	0.26928
247	0.205046	0.226219	0.182624		247	0.166248	0.224301	0.267664
248	0.204336	0.226005	0.181593		248	0.165284	0.224278	0.27123
249	0.204039	0.224926	0.180505		249	0.166506	0.223778	0.272947
250	0.202414	0.223383	0.180131		250	0.165558	0.222117	0.271944
251	0.205512	0.223213	0.182733		251	0.165437	0.221514	0.270729
252	0.204173	0.222194	0.182039		252	0.16328	0.221873	0.271675
253	0.203807	0.220018	0.182657		253	0.162763	0.221825	0.269492
254	0.202497	0.218656	0.182935		254	0.162449	0.220696	0.267784
255	0.203553	0.219881	0.18563		255	0.162521	0.221237	0.270502
256	0.200743	0.220872	0.18361		256	0.161281	0.220238	0.271744
257	0.20089	0.219953	0.184506		257	0.164217	0.222296	0.273644
258	0.201476	0.221466	0.185243		258	0.165071	0.223792	0.276674
259	0.203318	0.221164	0.186363		259	0.166359	0.224575	0.278073
260	0.202795	0.220829	0.184686		260	0.167764	0.228433	0.277549
261	0.203262	0.218658	0.185574		261	0.171363	0.227665	0.279031
262	0.202081	0.21933	0.185564		262	0.172533	0.225952	0.281332
263	0.199683	0.218716	0.18529		263	0.172939	0.224921	0.281782
264	0.198638	0.218849	0.184003		264	0.173511	0.224993	0.283764
265	0.198815	0.218762	0.183226		265	0.174386	0.221048	0.285434
266	0.199075	0.220204	0.184232		266	0.175225	0.222408	0.28806
267	0.199179	0.219451	0.182639		267	0.175963	0.222751	0.289561
268	0.201915	0.219361	0.181356		268	0.178012	0.220557	0.289499
269	0.201583	0.219334	0.181341		269	0.179848	0.218945	0.289938
270	0.199656	0.217931	0.18298		270	0.181033	0.217868	0.2926
271	0.19904	0.21638	0.181581		271	0.182115	0.216582	0.290891
272	0.199675	0.216023	0.182218		272	0.182714	0.215201	0.293557
273	0.198948	0.215621	0.180952		273	0.182965	0.21555	0.296336
274	0.200357	0.214356	0.179954		274	0.183171	0.215327	0.297785
275	0.200398	0.213297	0.177716		275	0.184635	0.217048	0.296481
276	0.201925	0.213524	0.176402		276	0.18438	0.218013	0.295838
277	0.202141	0.21381	0.17603		277	0.184272	0.220592	0.291162
278	0.203147	0.213267	0.176931		278	0.185938	0.224168	0.290568
279	0.202124	0.214514	0.176559		279	0.186944	0.226475	0.29188
280	0.203996	0.214278	0.176292		280	0.188188	0.22875	0.295568
281	0.204153	0.213875	0.176992		281	0.188926	0.232306	0.29656
282	0.203929	0.212302	0.174716		282	0.191436	0.234489	0.299269
283	0.201777	0.21266	0.175043		283	0.193211	0.234368	0.300386
284	0.201573	0.212989	0.174441		284	0.195587	0.238038	0.302446
285	0.202313	0.215369	0.17473		285	0.194716	0.238944	0.302946
286	0.201315	0.21604	0.171547		286	0.194364	0.238653	0.302956
287	0.200007	0.217918	0.172106		287	0.193071	0.237787	0.303663
288	0.20039	0.220076	0.171759		288	0.190194	0.236752	0.304976
289	0.200676	0.220545	0.173187		289	0.187827	0.2338	0.30454
290	0.19982	0.219933	0.172068		290	0.187994	0.234704	0.30781
291	0.19749	0.220977	0.1742		291	0.188489	0.233321	0.311199
292	0.199232	0.221518	0.173749		292	0.189844	0.233921	0.314065
293	0.199064	0.220274	0.175829		293	0.192501	0.235748	0.317757
294	0.199594	0.221147	0.17603		294	0.19281	0.235019	0.323177
295	0.201108	0.221229	0.176804		295	0.194072	0.236084	0.324086
296	0.201876	0.218797	0.176622		296	0.193701	0.237839	0.328914
297	0.200437	0.218676	0.177408		297	0.1932	0.237296	0.333424
298	0.200114	0.220295	0.176041		298	0.192293	0.24248	0.340445
299	0.200352	0.218961	0.173971		299	0.192478	0.24623	0.34468
300	0.199514	0.219042	0.174837		300	0.19188	0.246923	0.353293
301	0.200702	0.220341	0.174526		301	0.193951	0.247293	0.359346
302	0.201692	0.219129	0.174708		302	0.195674	0.24752	0.36783
303	0.203126	0.21757	0.173613		303	0.19717	0.24056	0.373587
304	0.200737	0.218176	0.173643		304	0.19802	0.242607	0.380012
305	0.1975	0.218981	0.17241		305	0.198112	0.244431	0.382859
306	0.197841	0.219029	0.17217		306	0.1966	0.246321	0.38671
307	0.195808	0.221766	0.171591		307	0.194499	0.246324	0.387855
308	0.194845	0.222315	0.169809		308	0.195372	0.251035	0.386067
309	0.195351	0.222769	0.168953		309	0.19786	0.250059	0.383077
310	0.197277	0.223406	0.167851		310	0.198174	0.248873	0.378616
311	0.196017	0.22516	0.170087		311	0.198877	0.246707	0.379373
312	0.195273	0.224604	0.170301		312	0.201396	0.249574	0.37561
313	0.19567	0.224859	0.171182		313	0.199958	0.248071	0.37274
314	0.19425	0.22548	0.172978		314	0.198211	0.24488	0.371559
315	0.194264	0.226326	0.174155		315	0.197812	0.245749	0.373116
316	0.196007	0.227733	0.17233		316	0.198205	0.250029	0.369012
317	0.197472	0.227503	0.172777		317	0.197915	0.248997	0.370069
318	0.197485	0.227836	0.17403		318	0.198899	0.250434	0.36421
319	0.19956	0.226522	0.175721		319	0.197174	0.25302	0.359825
320	0.199279	0.224517	0.176381		320	0.197469	0.25442	0.3563
321	0.200425	0.223467	0.177807		321	0.19665	0.254827	0.3534
322	0.202841	0.223753	0.180605		322	0.197202	0.255826	0.345041
323	0.203472	0.224554	0.183686		323	0.195658	0.256033	0.346804
324	0.204797	0.224449	0.186267		324	0.197861	0.255167	0.347625
325	0.205338	0.22574	0.18669		325	0.199301	0.252292	0.344169
326	0.202186	0.227035	0.187947		326	0.201867	0.247229	0.342091
327	0.200852	0.227978	0.187898		327	0.200824	0.243658	0.338169
328	0.200803	0.228885	0.189042		328	0.202005	0.237028	0.336245
329	0.200242	0.230089	0.188138		329	0.201626	0.233882	0.333211
330	0.19932	0.231981	0.192803		330	0.202373	0.228307	0.329297
331	0.199554	0.231154	0.193379		331	0.201085	0.223966	0.329307
332	0.199769	0.232975	0.19531		332	0.200642	0.223582	0.333429
333	0.19848	0.23401	0.196502		333	0.200807	0.22717	0.330922
334	0.197701	0.233674	0.198406		334	0.203164	0.225998	0.325545
335	0.19785	0.2324	0.196766		335	0.202953	0.224861	0.327972
336	0.199429	0.233452	0.199219		336	0.203403	0.225629	0.325024
337	0.197634	0.232734	0.200338		337	0.204372	0.225311	0.323376
338	0.198516	0.233045	0.201161		338	0.205522	0.220515	0.322482
339	0.19822	0.234684	0.201992		339	0.20445	0.220946	0.326289
340	0.198666	0.235689	0.203804		340	0.204506	0.220621	0.327864
341	0.197027	0.235626	0.205182		341	0.207717	0.219561	0.330384
342	0.196616	0.236827	0.208474		342	0.211109	0.21661	0.331887
343	0.193914	0.236918	0.210776		343	0.215794	0.217707	0.338364
344	0.191952	0.237702	0.214138		344	0.22088	0.216879	0.341685
345	0.191605	0.236666	0.215893		345	0.226805	0.215004	0.343529
346	0.190744	0.238362	0.216872		346	0.230985	0.213966	0.346253
347	0.190896	0.240152	0.216121		347	0.236897	0.215145	0.34851
348	0.192203	0.241445	0.216191		348	0.240788	0.215262	0.347054
349	0.194783	0.241545	0.215665		349	0.245765	0.215848	0.347818
350	0.194054	0.244527	0.216114		350	0.248997	0.220754	0.350999
351	0.193635	0.244455	0.217971		351	0.253141	0.218635	0.349587
352	0.195429	0.245605	0.217299		352	0.256057	0.219384	0.350937
353	0.195294	0.244147	0.218188		353	0.259459	0.218508	0.351201
354	0.194815	0.245102	0.219139		354	0.262556	0.219568	0.351624
355	0.194723	0.246524	0.218655		355	0.266262	0.215523	0.349431
356	0.196189	0.248294	0.217056		356	0.269045	0.215494	0.350037
357	0.195527	0.245314	0.218788		357	0.270787	0.213412	0.351271
358	0.19529	0.246618	0.217901		358	0.272357	0.212196	0.34809
359	0.19453	0.248841	0.215761		359	0.273335	0.208907	0.348894
360	0.194066	0.248948	0.217416		360	0.274412	0.210688	0.34995
361	0.195013	0.246444	0.217694		361	0.273872	0.212996	0.348407
362	0.194599	0.245778	0.215505		362	0.273592	0.212612	0.344192
363	0.196332	0.243879	0.214094		363	0.274019	0.213441	0.344009
364	0.196256	0.240692	0.214543		364	0.27355	0.212608	0.339937
365	0.197784	0.238679	0.213718		365	0.271129	0.21109	0.335899
366	0.196394	0.237908	0.213961		366	0.268184	0.209687	0.334294
367	0.194974	0.236853	0.214178		367	0.265935	0.212356	0.329574
368	0.195104	0.237931	0.21598		368	0.262831	0.211292	0.329651
369	0.194006	0.238531	0.216682		369	0.257867	0.211033	0.327259
370	0.195464	0.236915	0.216089		370	0.253219	0.20978	0.325664
371	0.195452	0.23566	0.213126		371	0.252136	0.210191	0.319356
372	0.196434	0.237138	0.213366		372	0.249036	0.206141	0.318732
373	0.194312	0.236531	0.211878		373	0.245035	0.206811	0.313955
374	0.197376	0.234676	0.209664		374	0.244115	0.206126	0.312163
375	0.195276	0.235194	0.210044		375	0.243495	0.206407	0.308748
376	0.195626	0.236744	0.212516		376	0.241135	0.204679	0.31104
377	0.195251	0.23392	0.212669		377	0.240027	0.20486	0.3065
378	0.195097	0.231812	0.211301		378	0.23609	0.205001	0.305343
379	0.193243	0.231528	0.211864		379	0.233578	0.204332	0.301351
380	0.193912	0.230183	0.20908		380	0.232694	0.204484	0.295947
381	0.194483	0.229327	0.207189		381	0.228723	0.204434	0.288993
382	0.196406	0.232279	0.206878		382	0.2257	0.203	0.288748
383	0.1969	0.232673	0.207957		383	0.226649	0.199007	0.285109
384	0.196921	0.233714	0.20665		384	0.223563	0.199553	0.284873
385	0.196436	0.234473	0.208532		385	0.219466	0.198348	0.285191
386	0.196192	0.235605	0.210883		386	0.218143	0.19731	0.284448
387	0.195476	0.235229	0.209391		387	0.214526	0.195545	0.279413
388	0.194862	0.23594	0.208201		388	0.212997	0.197816	0.280869
389	0.196581	0.235325	0.209675		389	0.214537	0.200063	0.276862
390	0.197596	0.236321	0.208544		390	0.216841	0.198549	0.273541
391	0.196915	0.235984	0.208519		391	0.219296	0.199263	0.271896
392	0.196383	0.2377	0.208161		392	0.222637	0.201835	0.272543
393	0.195761	0.236612	0.209868		393	0.222533	0.199453	0.26618
394	0.192614	0.236645	0.21004		394	0.221671	0.195762	0.265071
395	0.191649	0.237048	0.209969		395	0.221449	0.19537	0.262557
396	0.192673	0.236926	0.209637		396	0.220231	0.194798	0.263967
397	0.193964	0.232564	0.210154		397	0.219412	0.19256	0.263145
398	0.195676	0.23333	0.210842		398	0.220668	0.193154	0.266976
399	0.198585	0.234569	0.212521		399	0.222995	0.192345	0.264697
400	0.198528	0.232496	0.214846		400	0.223033	0.192653	0.266035
401	0.196361	0.233373	0.214208		401	0.224813	0.193498	0.262373
402	0.195233	0.23608	0.218646		402	0.226219	0.193741	0.260723
403	0.195941	0.237722	0.216217		403	0.227854	0.195928	0.257248
404	0.193588	0.236932	0.215589		404	0.227278	0.197188	0.25646
405	0.19204	0.236657	0.211517		405	0.228285	0.19756	0.255465
406	0.193202	0.23607	0.208867		406	0.227242	0.196223	0.256271
407	0.193881	0.235689	0.203049		407	0.226742	0.195678	0.256986
408	0.193455	0.234698	0.203404		408	0.225609	0.194808	0.256092
409	0.193781	0.234647	0.202548		409	0.227262	0.195991	0.25561
410	0.19508	0.236494	0.205964		410	0.2283	0.195627	0.252943
411	0.194595	0.237323	0.207739		411	0.230362	0.195674	0.24937
412	0.193848	0.23681	0.208652		412	0.231844	0.195587	0.246657
413	0.192149	0.238881	0.208671		413	0.233337	0.194923	0.245196
414	0.193928	0.240991	0.20589		414	0.23133	0.192012	0.245378
415	0.194678	0.241283	0.201554		415	0.230408	0.19482	0.245069
416	0.19553	0.240651	0.19999		416	0.231021	0.195933	0.246625
417	0.196462	0.242533	0.20028		417	0.229453	0.193993	0.246877
418	0.198446	0.241436	0.200194		418	0.228316	0.19207	0.248792
419	0.19723	0.240218	0.202536		419	0.229183	0.191468	0.24803
420	0.197344	0.241131	0.207205		420	0.22952	0.186711	0.250757
421	0.196149	0.241076	0.207377		421	0.22916	0.185074	0.249534
422	0.195418	0.240499	0.208767		422	0.230976	0.18923	0.250846
423	0.194389	0.241299	0.207321		423	0.233279	0.192319	0.247137
424	0.194964	0.241099	0.205969		424	0.234876	0.194874	0.243698
425	0.194198	0.240072	0.204067		425	0.238212	0.198414	0.243261
426	0.196289	0.240362	0.205039		426	0.241013	0.200872	0.242155
427	0.196365	0.240683	0.203674		427	0.243596	0.198837	0.242056
428	0.19826	0.240231	0.205674		428	0.245715	0.195514	0.245464
429	0.197333	0.240231	0.204203		429	0.248608	0.195525	0.247102
430	0.198039	0.240717	0.203216		430	0.247664	0.190808	0.244498
431	0.198216	0.240762	0.20274		431	0.24794	0.186638	0.246089
432	0.197765	0.241414	0.200853		432	0.249896	0.186136	0.243817
433	0.194281	0.240804	0.198732		433	0.250012	0.188116	0.243781
434	0.19683	0.24068	0.200483		434	0.24994	0.185248	0.245493
435	0.198608	0.240682	0.201674		435	0.252315	0.188657	0.24798
436	0.199024	0.241862	0.200807		436	0.251156	0.189774	0.249766
437	0.199858	0.241519	0.202083		437	0.249546	0.189902	0.25318
438	0.2019	0.241513	0.20289		438	0.246538	0.187398	0.252738
439	0.199158	0.242522	0.20352		439	0.243595	0.190969	0.255675
440	0.197303	0.242706	0.201319		440	0.240424	0.190937	0.254388
441	0.196903	0.241648	0.20132		441	0.240016	0.192773	0.252792
442	0.198383	0.243263	0.200167		442	0.237396	0.193663	0.253599
443	0.198934	0.242871	0.200195		443	0.237109	0.196663	0.253834
444	0.200112	0.241674	0.198866		444	0.235847	0.194513	0.25152
445	0.19969	0.24313	0.19732		445	0.234743	0.194173	0.251878
446	0.198046	0.243424	0.195844		446	0.23105	0.192743	0.254186
447	0.196495	0.241405	0.195301		447	0.228789	0.195031	0.254727
448	0.197333	0.242459	0.19516		448	0.224597	0.194903	0.258803
449	0.198474	0.243678	0.193756		449	0.220975	0.195785	0.256432
450	0.198948	0.241903	0.1956		450	0.217705	0.197615	0.256189
451	0.201662	0.240188	0.197354		451	0.213994	0.197204	0.25456
452	0.202051	0.239219	0.198275		452	0.211845	0.194541	0.253227
453	0.201435	0.238343	0.194624		453	0.212654	0.192203	0.25129
454	0.201859	0.237242	0.194293		454	0.209941	0.19368	0.257225
455	0.202671	0.235432	0.193683		455	0.206771	0.191378	0.25691
456	0.200268	0.235321	0.19064		456	0.207346	0.191945	0.257219
457	0.201492	0.23412	0.188624		457	0.205437	0.192353	0.256348
458	0.201879	0.232973	0.190324		458	0.199357	0.195323	0.256537
459	0.199743	0.234329	0.189084		459	0.19735	0.194916	0.253082
460	0.199202	0.233813	0.187288		460	0.19499	0.196527	0.25487
461	0.200424	0.233361	0.187923		461	0.19118	0.196464	0.257382
462	0.20087	0.233368	0.188718		462	0.189098	0.194521	0.256039
463	0.200543	0.233515	0.188499		463	0.190823	0.192649	0.252058
464	0.20177	0.233068	0.188957		464	0.19076	0.190188	0.251779
465	0.203637	0.233332	0.188921		465	0.191889	0.190833	0.251991
466	0.204214	0.233545	0.189907		466	0.189854	0.189405	0.248407
467	0.20326	0.234894	0.188106		467	0.187781	0.192624	0.253469
468	0.203003	0.234123	0.186685		468	0.186286	0.195097	0.257494
469	0.202168	0.232101	0.185562		469	0.184399	0.195916	0.260823
470	0.202179	0.230689	0.186624		470	0.181795	0.194134	0.261386
471	0.202409	0.229005	0.18253		471	0.180331	0.196882	0.264452
472	0.20122	0.228567	0.183061		472	0.180086	0.197241	0.266144
473	0.202183	0.22978	0.183194		473	0.178471	0.198441	0.266473
474	0.203322	0.230736	0.183278		474	0.177566	0.1989	0.267473
475	0.203462	0.23093	0.181191		475	0.177912	0.202065	0.268174
476	0.201854	0.232616	0.185796		476	0.177862	0.20172	0.269249
477	0.203286	0.231239	0.184529		477	0.177345	0.201625	0.268384
478	0.203553	0.230406	0.185581		478	0.176834	0.200427	0.267508
479	0.203269	0.229173	0.185149		479	0.176988	0.202834	0.267466
480	0.202412	0.230723	0.184011		480	0.175694	0.200587	0.268974
481	0.202851	0.231009	0.182969		481	0.176637	0.200801	0.269945
482	0.203132	0.231001	0.185378		482	0.175712	0.201277	0.265817
483	0.201908	0.23011	0.182616		483	0.174614	0.201387	0.267311
484	0.20305	0.229777	0.181204		484	0.173082	0.201381	0.264504
485	0.203383	0.227983	0.182184		485	0.171787	0.20064	0.265811
486	0.203701	0.226491	0.178762		486	0.169813	0.200481	0.263885
487	0.200896	0.226717	0.175975		487	0.169476	0.199804	0.267455
488	0.202314	0.226684	0.176065		488	0.169361	0.200113	0.267841
489	0.20036	0.227026	0.17713		489	0.170165	0.198369	0.272477
490	0.19918	0.228056	0.178019		490	0.170418	0.198005	0.272403
491	0.197797	0.227489	0.179615		491	0.170072	0.199293	0.274435
492	0.199824	0.22822	0.177401		492	0.169822	0.197805	0.274878
493	0.198903	0.227955	0.175952		493	0.168568	0.199225	0.275351
494	0.198213	0.227447	0.175696		494	0.167307	0.198631	0.276123
495	0.197736	0.227027	0.175237		495	0.166106	0.202024	0.275307
496	0.198343	0.229626	0.17435		496	0.166868	0.199273	0.275322
497	0.197472	0.228965	0.177091		497	0.164906	0.20055	0.276748
498	0.196288	0.230456	0.178275		498	0.164482	0.198481	0.273462
499	0.197895	0.230437	0.178134		499	0.162817	0.197388	0.271696
500	0.199246	0.231478	0.175315		500	0.161842	0.195594	0.269186
501	0.198453	0.230803	0.174584		501	0.161125	0.198376	0.272368
502	0.197954	0.232228	0.173588		502	0.162495	0.198611	0.272146
503	0.199573	0.231202	0.174364		503	0.162428	0.197394	0.27746
504	0.197578	0.231294	0.172891		504	0.16321	0.200304	0.276357
505	0.196796	0.230821	0.176498		505	0.164357	0.198493	0.279748
506	0.199004	0.230588	0.175471		506	0.164757	0.197183	0.274558
507	0.199524	0.229184	0.17605		507	0.163678	0.197618	0.272788
508	0.197682	0.230266	0.175738		508	0.163612	0.197725	0.269265
509	0.199305	0.230464	0.175651		509	0.164359	0.197172	0.267797
510	0.198877	0.231175	0.171732		510	0.163535	0.201851	0.264935
511	0.199199	0.231542	0.172578		511	0.161599	0.204629	0.265065
512	0.199062	0.232793	0.171504		512	0.162895	0.201532	0.265376
513	0.198566	0.233684	0.17127		513	0.162492	0.199718	0.261268
514	0.197151	0.234938	0.173118		514	0.161468	0.19941	0.25961
515	0.196935	0.236317	0.174507		515	0.161106	0.195332	0.257272
516	0.193967	0.237582	0.174786		516	0.163383	0.192584	0.254435
517	0.193532	0.23701	0.176927		517	0.162149	0.195573	0.252215
518	0.193491	0.235265	0.176186		518	0.16226	0.197691	0.250759
519	0.193657	0.236005	0.175644		519	0.162137	0.197767	0.248684
520	0.193273	0.232958	0.177016		520	0.1627	0.198506	0.247355
521	0.194175	0.231022	0.176243		521	0.162335	0.196559	0.248819
522	0.195441	0.230506	0.174191		522	0.164081	0.195141	0.248519
523	0.195035	0.232082	0.17362		523	0.16423	0.196734	0.249248
524	0.194471	0.231547	0.173679		524	0.164689	0.19617	0.252329
525	0.193075	0.232936	0.172235		525	0.165199	0.196241	0.25444
526	0.192324	0.232466	0.171554		526	0.164413	0.198904	0.253789
527	0.191272	0.233326	0.172739		527	0.162672	0.198401	0.255257
528	0.191597	0.234072	0.173086		528	0.162765	0.195243	0.260289
529	0.191433	0.234488	0.171972		529	0.163818	0.194772	0.259479
530	0.191188	0.23527	0.171418		530	0.163429	0.193733	0.26061
531	0.191628	0.237329	0.172489		531	0.164149	0.193427	0.261968
532	0.192816	0.238269	0.169907		532	0.163774	0.194777	0.26308
533	0.193774	0.238097	0.169287		533	0.163509	0.198994	0.260701
534	0.194497	0.238182	0.166937		534	0.162299	0.202003	0.263854
535	0.194864	0.238849	0.16708		535	0.162068	0.204524	0.264614
536	0.1955	0.238737	0.166103		536	0.161378	0.208286	0.268472
537	0.194445	0.237789	0.1669		537	0.161129	0.212531	0.269853
538	0.194534	0.238166	0.167665		538	0.160466	0.216737	0.269839
539	0.195187	0.237832	0.168976		539	0.16051	0.21857	0.266156
540	0.196398	0.237011	0.168518		540	0.160163	0.220657	0.262005
541	0.197588	0.238858	0.168629		541	0.159765	0.219029	0.259672
542	0.197793	0.238556	0.168437		542	0.159836	0.221362	0.255878
543	0.197237	0.237552	0.169328		543	0.160395	0.219367	0.258757
544	0.195127	0.236855	0.168745		544	0.160053	0.222413	0.262021
545	0.193376	0.235043	0.167748		545	0.160071	0.225861	0.266924
546	0.191422	0.233111	0.167912		546	0.160699	0.22907	0.26922
547	0.190548	0.232407	0.168214		547	0.16173	0.229427	0.270138
548	0.188248	0.231582	0.168705		548	0.16201	0.232798	0.269284
549	0.189015	0.231966	0.171024		549	0.162041	0.231674	0.27062
550	0.188916	0.233446	0.171691		550	0.162	0.229976	0.268118
551	0.188545	0.232335	0.172354		551	0.161186	0.233065	0.267704
552	0.187311	0.232643	0.173071		552	0.161212	0.234671	0.270504
553	0.188359	0.231658	0.171038		553	0.160353	0.231823	0.273469
554	0.186406	0.230157	0.168348		554	0.160516	0.233275	0.273187
555	0.185977	0.228918	0.168001		555	0.161284	0.236532	0.279843
556	0.184252	0.229659	0.167865		556	0.163014	0.233959	0.282234
557	0.18648	0.2293	0.16733		557	0.162412	0.231037	0.284229
558	0.188424	0.229476	0.166913		558	0.162711	0.232248	0.284801
559	0.189973	0.231266	0.168235		559	0.161413	0.232385	0.290134
560	0.192106	0.232951	0.168412		560	0.160471	0.230325	0.291504
561	0.193884	0.232367	0.168716		561	0.158875	0.231143	0.291469
562	0.191582	0.23334	0.167691		562	0.15882	0.232514	0.297108
563	0.189854	0.233512	0.167735		563	0.159017	0.233732	0.30108
564	0.191898	0.234466	0.167955		564	0.1593	0.233982	0.302828
565	0.190663	0.233208	0.169292		565	0.159978	0.234991	0.306493
566	0.189432	0.23451	0.167873		566	0.160517	0.23328	0.308162
567	0.18925	0.234775	0.169215		567	0.160259	0.232845	0.308135
568	0.189257	0.234681	0.172794		568	0.159618	0.228965	0.310538
569	0.187128	0.234195	0.173862		569	0.159296	0.227714	0.308759
570	0.188396	0.234724	0.17226		570	0.158848	0.22299	0.306198
571	0.191236	0.23382	0.172068		571	0.158718	0.224172	0.309249
572	0.194334	0.234068	0.171452		572	0.159528	0.219989	0.307676
573	0.195707	0.236081	0.169055		573	0.1597	0.221057	0.307588
574	0.197135	0.235668	0.169586		574	0.161131	0.218005	0.308533
575	0.197303	0.236285	0.173485		575	0.161512	0.216628	0.312074
576	0.198767	0.237606	0.175579		576	0.16183	0.212699	0.312314
577	0.196518	0.238158	0.174386		577	0.161133	0.211345	0.31426
578	0.197044	0.236115	0.1742		578	0.160067	0.209811	0.312977
579	0.197484	0.236077	0.173334		579	0.160426	0.208259	0.313996
580	0.196872	0.235606	0.171969		580	0.159309	0.208828	0.309756
581	0.195641	0.234597	0.173136		581	0.158522	0.209129	0.309212
582	0.19745	0.232536	0.17567		582	0.159323	0.209824	0.308235
583	0.197336	0.234342	0.17486		583	0.159918	0.2075	0.308255
584	0.197243	0.233337	0.174692		584	0.159747	0.207914	0.305732
585	0.196686	0.233012	0.173552		585	0.160387	0.208964	0.308505
586	0.194226	0.233133	0.171989		586	0.161348	0.206261	0.307606
587	0.193643	0.234428	0.17025		587	0.162013	0.205159	0.307859
588	0.194273	0.232373	0.169668		588	0.162394	0.20291	0.31087
589	0.195598	0.232098	0.168896		589	0.161225	0.200902	0.3132
590	0.197213	0.231691	0.17012		590	0.160934	0.195966	0.313684
591	0.199296	0.230742	0.16893		591	0.159752	0.19432	0.314838
592	0.197859	0.228109	0.169101		592	0.160284	0.193595	0.314043
593	0.198207	0.227149	0.170753		593	0.161225	0.195783	0.310585
594	0.198078	0.226121	0.170005		594	0.161613	0.195358	0.313342
595	0.19871	0.225074	0.16974		595	0.162463	0.197527	0.312814
596	0.198571	0.223648	0.170639		596	0.162659	0.198829	0.313677
597	0.202754	0.224102	0.17126		597	0.160299	0.19852	0.313456
598	0.202149	0.224989	0.170293		598	0.160226	0.199004	0.317326
599	0.202187	0.22466	0.170613		599	0.160115	0.199843	0.321392
600	0.201733	0.224093	0.168126		600	0.15969	0.198934	0.322918
601	0.202422	0.224062	0.168479		601	0.160335	0.198694	0.32549
602	0.203424	0.224149	0.167386		602	0.160253	0.197686	0.32696
603	0.204125	0.223434	0.168768		603	0.160194	0.196553	0.327822
604	0.203615	0.222502	0.168878		604	0.160844	0.194478	0.326186
605	0.20249	0.221851	0.169323		605	0.160585	0.195248	0.329441
606	0.202147	0.221432	0.170233		606	0.160285	0.195653	0.328438
607	0.197116	0.221558	0.172556		607	0.160887	0.195636	0.328675
608	0.196314	0.221752	0.170626		608	0.160994	0.193867	0.325447
609	0.195519	0.223004	0.171465		609	0.161613	0.192909	0.322881
610	0.196426	0.224972	0.172974		610	0.161823	0.191487	0.320066
611	0.199561	0.226355	0.171964		611	0.162052	0.192533	0.318568
612	0.201682	0.225938	0.171743		612	0.162641	0.192233	0.318181
613	0.202405	0.226815	0.173947		613	0.161241	0.19564	0.31724
614	0.202902	0.227033	0.17424		614	0.161045	0.198166	0.316876
615	0.201249	0.226434	0.173265		615	0.161304	0.198103	0.314671
616	0.19769	0.225902	0.173211		616	0.160995	0.197295	0.310364
617	0.197393	0.227908	0.173007		617	0.161998	0.198012	0.305027
618	0.19702	0.228876	0.170698		618	0.163267	0.194785	0.302533
619	0.197193	0.231139	0.17036		619	0.162786	0.192145	0.300114
620	0.197904	0.233751	0.171368		620	0.16359	0.192298	0.303707
621	0.197419	0.233878	0.171711		621	0.164337	0.192609	0.303498
622	0.196478	0.231836	0.170757		622	0.163692	0.190188	0.304108
623	0.196195	0.231705	0.171224		623	0.164633	0.188874	0.306784
624	0.195829	0.230845	0.171779		624	0.164961	0.190842	0.303679
625	0.196855	0.229189	0.171635		625	0.164548	0.190902	0.29267
626	0.198027	0.230692	0.171025		626	0.163717	0.188242	0.28927
627	0.199211	0.232384	0.170654		627	0.164222	0.189351	0.28721
628	0.19654	0.23186	0.170471		628	0.163904	0.191063	0.283195
629	0.196337	0.232716	0.170962		629	0.164369	0.189292	0.281578
630	0.19426	0.232796	0.170227		630	0.165514	0.186714	0.283714
631	0.192828	0.233433	0.170621		631	0.16529	0.189374	0.28663
632	0.192984	0.233142	0.171811		632	0.164465	0.19001	0.284384
633	0.194848	0.232527	0.173279		633	0.165336	0.190393	0.28374
634	0.196122	0.232542	0.172549		634	0.164104	0.191867	0.284825
635	0.199184	0.233891	0.171454		635	0.162648	0.194057	0.285949
636	0.201127	0.233209	0.170999		636	0.1639	0.192784	0.282731
637	0.20197	0.23316	0.170623		637	0.163637	0.193889	0.282125
638	0.202864	0.233872	0.169031		638	0.163058	0.192437	0.279276
639	0.202495	0.23162	0.169196		639	0.163792	0.189955	0.27538
640	0.202991	0.229599	0.169915		640	0.164982	0.191149	0.274223
641	0.204957	0.227316	0.170631		641	0.164967	0.190963	0.278123
642	0.203644	0.227707	0.171029		642	0.165513	0.189437	0.281367
643	0.205833	0.228108	0.171857		643	0.165753	0.188817	0.284537
644	0.205149	0.22819	0.170991		644	0.166288	0.189305	0.290443
645	0.206343	0.228527	0.170541		645	0.165953	0.187098	0.293053
646	0.204474	0.229061	0.169611		646	0.166086	0.185759	0.288335
647	0.20329	0.2287	0.168381		647	0.166492	0.184996	0.289985
648	0.203647	0.227199	0.168247		648	0.166847	0.183246	0.288295
649	0.20483	0.22685	0.168705		649	0.166803	0.183174	0.284054
650	0.2034	0.22745	0.169865		650	0.168295	0.184697	0.281021
651	0.202927	0.231563	0.169244		651	0.169021	0.184119	0.281741
652	0.20657	0.232604	0.170707		652	0.168598	0.185603	0.276476
653	0.204897	0.233277	0.16957		653	0.169624	0.18641	0.276272
654	0.205303	0.23425	0.169922		654	0.170364	0.185147	0.274952
655	0.205419	0.23546	0.169532		655	0.168928	0.184421	0.271359
656	0.206537	0.234393	0.169399		656	0.168915	0.185333	0.270085
657	0.207427	0.235451	0.169344		657	0.170343	0.183759	0.269905
658	0.207463	0.238009	0.172019		658	0.169498	0.184114	0.265444
659	0.208624	0.240417	0.171252		659	0.169927	0.184875	0.26476
660	0.207563	0.240167	0.172243		660	0.169334	0.184024	0.265245
661	0.207635	0.23931	0.172988		661	0.169314	0.184185	0.264194
662	0.207527	0.238619	0.172416		662	0.169554	0.184422	0.264311
663	0.208547	0.236388	0.17184		663	0.170922	0.185241	0.264898
664	0.21011	0.234952	0.171773		664	0.170949	0.184717	0.261462
665	0.212376	0.234309	0.172498		665	0.172921	0.185673	0.260174
666	0.215375	0.23234	0.173556		666	0.172715	0.184563	0.257615
667	0.214527	0.231387	0.172972		667	0.173561	0.184672	0.256752
668	0.215716	0.23339	0.170943		668	0.173895	0.181938	0.255614
669	0.212335	0.232664	0.171854		669	0.174672	0.184946	0.256866
670	0.212222	0.231873	0.170474		670	0.176295	0.184192	0.256369
671	0.208429	0.233414	0.16847		671	0.176646	0.184835	0.25586
672	0.205986	0.234673	0.16625		672	0.176235	0.183979	0.252569
673	0.203166	0.232362	0.168114		673	0.175779	0.184706	0.254732
674	0.203602	0.2325	0.166627		674	0.175659	0.183325	0.254865
675	0.201336	0.232628	0.167251		675	0.174868	0.182792	0.252029
676	0.201883	0.233135	0.167604		676	0.176791	0.182334	0.251481
677	0.204719	0.232744	0.169489		677	0.178258	0.182052	0.252434
678	0.207044	0.23373	0.169097		678	0.179168	0.183455	0.249595
679	0.204428	0.234913	0.171051		679	0.180153	0.182505	0.245989
680	0.204864	0.236916	0.170778		680	0.180681	0.182105	0.247855
681	0.203771	0.237552	0.170985		681	0.180174	0.180831	0.249793
682	0.201193	0.238472	0.173092		682	0.179259	0.181236	0.250057
683	0.197813	0.239647	0.173326		683	0.178908	0.180695	0.250399
684	0.198416	0.239339	0.172971		684	0.178078	0.180745	0.253513
685	0.195549	0.237439	0.173103		685	0.177558	0.181792	0.254305
686	0.194358	0.236483	0.173781		686	0.1771	0.181457	0.252819
687	0.192399	0.23596	0.172435		687	0.177841	0.180151	0.254208
688	0.191525	0.234383	0.172011		688	0.178946	0.180737	0.255606
689	0.19109	0.234382	0.171899		689	0.180456	0.179834	0.255772
690	0.190419	0.234339	0.170694		690	0.1814	0.179427	0.255696
691	0.189374	0.233587	0.171127		691	0.182563	0.179868	0.256142
692	0.188317	0.2335	0.17165		692	0.182464	0.182451	0.255234
693	0.187084	0.235078	0.173695		693	0.182081	0.18266	0.256864
694	0.186507	0.233857	0.173863		694	0.18115	0.182453	0.258339
695	0.186826	0.234002	0.174966		695	0.180244	0.181528	0.258694
696	0.184118	0.235412	0.174735		696	0.180011	0.181501	0.25832
697	0.18305	0.235443	0.175555		697	0.179469	0.181055	0.259786
698	0.182028	0.233555	0.174579		698	0.178579	0.179947	0.255722
699	0.180972	0.235047	0.173057		699	0.17909	0.180432	0.2549
700	0.180695	0.236082	0.174285		700	0.178287	0.18329	0.253431
701	0.181902	0.235287	0.175567		701	0.176615	0.185597	0.253357
702	0.18312	0.234318	0.174068		702	0.176024	0.183418	0.24819
703	0.18261	0.235377	0.173554		703	0.177047	0.184306	0.246088
704	0.18331	0.234342	0.174882		704	0.175354	0.184774	0.242552
705	0.18248	0.233481	0.175588		705	0.175871	0.183817	0.242807
706	0.184346	0.233597	0.173348		706	0.177487	0.180447	0.242347
707	0.182369	0.235408	0.175133		707	0.177457	0.181381	0.244075
708	0.183732	0.235664	0.174846		708	0.176974	0.181609	0.245492
709	0.183991	0.235145	0.175924		709	0.176747	0.183374	0.247809
710	0.184029	0.236505	0.174628		710	0.176554	0.183962	0.246336
711	0.184368	0.23704	0.17799		711	0.175487	0.187331	0.246047
712	0.185056	0.235127	0.17767		712	0.175251	0.186179	0.244644
713	0.184631	0.236322	0.178559		713	0.173782	0.18475	0.244299
714	0.183621	0.238088	0.17805		714	0.175151	0.183667	0.242378
715	0.18596	0.237561	0.177244		715	0.175323	0.17979	0.240573
716	0.185232	0.2382	0.176112		716	0.175617	0.178036	0.240922
717	0.186334	0.236933	0.176355		717	0.176385	0.178885	0.242287
718	0.187139	0.235382	0.175047		718	0.176892	0.178112	0.242279
719	0.188768	0.235136	0.175842		719	0.176643	0.177771	0.241208
720	0.188548	0.234787	0.177137		720	0.176898	0.178275	0.243444
721	0.189715	0.232858	0.176788		721	0.176002	0.177891	0.242
722	0.192243	0.233898	0.175943		722	0.173172	0.177762	0.242479
723	0.189994	0.233538	0.175512		723	0.172157	0.179202	0.24252
724	0.189598	0.234035	0.176606		724	0.171156	0.177977	0.243179
725	0.190833	0.232672	0.177608		725	0.171252	0.180143	0.243485
726	0.190041	0.23265	0.177288		726	0.172682	0.18146	0.246859
727	0.189558	0.23292	0.176969		727	0.174139	0.181462	0.248671
728	0.192746	0.231445	0.180014		728	0.174325	0.180278	0.249982
729	0.192767	0.228803	0.178183		729	0.175046	0.181445	0.252347
730	0.193028	0.230116	0.175997		730	0.173911	0.180747	0.254191
731	0.192005	0.23102	0.175887		731	0.172143	0.179146	0.254083
732	0.190353	0.230919	0.177414		732	0.173036	0.180836	0.253058
733	0.189892	0.232068	0.175184		733	0.174324	0.182997	0.252331
734	0.189036	0.233023	0.173366		734	0.173114	0.183569	0.254217
735	0.186446	0.233957	0.174492		735	0.173755	0.183909	0.25317
736	0.187922	0.233273	0.174567		736	0.17343	0.184623	0.253285
737	0.188115	0.233437	0.173262		737	0.173356	0.183982	0.253085
738	0.187348	0.23297	0.173111		738	0.172601	0.182107	0.253826
739	0.188152	0.23356	0.173545		739	0.17313	0.181463	0.250951
740	0.189983	0.233196	0.171306		740	0.171248	0.180549	0.249466
741	0.189668	0.23262	0.170657		741	0.171203	0.17914	0.24877
742	0.188725	0.231641	0.169749		742	0.169759	0.17782	0.250708
743	0.190191	0.23032	0.169685		743	0.169383	0.179769	0.251843
744	0.188931	0.228878	0.169667		744	0.167088	0.179409	0.2557
745	0.186629	0.227017	0.170929		745	0.167876	0.17962	0.258153
746	0.185677	0.226945	0.173061		746	0.166239	0.180744	0.257897
747	0.186292	0.226911	0.172761		747	0.166981	0.180887	0.259886
748	0.184424	0.227217	0.17471		748	0.165898	0.178888	0.261667
749	0.185906	0.225833	0.175203		749	0.166882	0.179857	0.258591
750	0.186566	0.22512	0.176289		750	0.166575	0.179117	0.258882
751	0.185565	0.224848	0.174038		751	0.167994	0.179621	0.259373
752	0.186163	0.223995	0.174368		752	0.166811	0.179246	0.25741
753	0.185545	0.222871	0.171122		753	0.167077	0.178425	0.254306
754	0.1841	0.223305	0.171438		754	0.16852	0.176747	0.256007
755	0.182084	0.222197	0.17057		755	0.167852	0.176991	0.256275
756	0.182979	0.220077	0.170622		756	0.168162	0.176686	0.257651
757	0.181096	0.21928	0.17142		757	0.168202	0.177156	0.258056
758	0.181559	0.218989	0.173224		758	0.16817	0.177327	0.259971
759	0.181635	0.217226	0.175139		759	0.166649	0.177444	0.261424
760	0.183132	0.21534	0.174839		760	0.166774	0.176759	0.264098
761	0.184201	0.21502	0.175077		761	0.16547	0.174733	0.263734
762	0.185663	0.213795	0.175281		762	0.164696	0.174951	0.264761
763	0.186441	0.213377	0.175206		763	0.16465	0.17569	0.263704
764	0.186224	0.21361	0.173635		764	0.164542	0.174571	0.264567
765	0.185535	0.215014	0.174109		765	0.1657	0.177186	0.262617
766	0.18491	0.215878	0.174331		766	0.166383	0.177129	0.263648
767	0.185223	0.21503	0.173142		767	0.165928	0.17726	0.260889
768	0.185344	0.213393	0.175614		768	0.166018	0.178416	0.260622
769	0.186501	0.212094	0.175092		769	0.166388	0.180417	0.260145
770	0.187456	0.210316	0.173606		770	0.165098	0.179454	0.258683
771	0.188417	0.209594	0.173311		771	0.164384	0.182521	0.257692
772	0.188269	0.210356	0.173152		772	0.166588	0.182007	0.259999
773	0.189223	0.209924	0.170709		773	0.166563	0.180417	0.260855
774	0.1892	0.210825	0.169659		774	0.167845	0.1809	0.254774
775	0.190885	0.212102	0.171041		775	0.168179	0.178933	0.255293
776	0.191339	0.212033	0.172153		776	0.169372	0.177217	0.255348
777	0.192819	0.211918	0.174003		777	0.169187	0.177627	0.255185
778	0.194094	0.213985	0.173569		778	0.170343	0.178145	0.256031
779	0.196433	0.21501	0.174435		779	0.170263	0.176049	0.257285
780	0.195019	0.214204	0.173988		780	0.170698	0.176443	0.253806
781	0.194072	0.215553	0.175544		781	0.172097	0.176016	0.252734
782	0.193814	0.216805	0.17412		782	0.173212	0.1767	0.251226
783	0.193339	0.216544	0.173653		783	0.173356	0.177819	0.251598
784	0.192011	0.215672	0.174742		784	0.17488	0.179329	0.254371
785	0.194176	0.217493	0.17539		785	0.177094	0.178472	0.257732
786	0.19402	0.216649	0.172998		786	0.177759	0.178326	0.257823
787	0.191889	0.216798	0.174803		787	0.177713	0.176247	0.257533
788	0.19196	0.218657	0.176382		788	0.178166	0.174107	0.258188
789	0.190611	0.219017	0.176905		789	0.177325	0.173344	0.261122
790	0.188858	0.219329	0.178025		790	0.177767	0.175225	0.263674
791	0.187731	0.218822	0.178819		791	0.177417	0.178641	0.264361
792	0.188972	0.217551	0.178199		792	0.178061	0.179314	0.266197
793	0.187489	0.215418	0.179883		793	0.178082	0.180204	0.265292
794	0.189256	0.214982	0.180124		794	0.177446	0.179902	0.262017
795	0.189783	0.213851	0.179692		795	0.176408	0.180943	0.258061
796	0.188898	0.213846	0.179687		796	0.176308	0.178705	0.258329
797	0.189333	0.214555	0.18009		797	0.176051	0.179201	0.257761
798	0.188327	0.214809	0.180223		798	0.175015	0.180895	0.256238
799	0.185614	0.215422	0.18078		799	0.175553	0.182205	0.256169
800	0.183609	0.21589	0.181495		800	0.174976	0.179885	0.255981
801	0.183359	0.218359	0.182069		801	0.174125	0.179036	0.2547
802	0.182856	0.218338	0.181448		802	0.174738	0.179486	0.252999
803	0.182792	0.21936	0.181169		803	0.175652	0.175562	0.254536
804	0.183636	0.220022	0.181172		804	0.174824	0.174821	0.253769
805	0.18345	0.220322	0.182177		805	0.174608	0.174631	0.254103
806	0.185689	0.218466	0.185495		806	0.174418	0.174272	0.252685
807	0.18311	0.21978	0.187447		807	0.173611	0.173814	0.254035
808	0.181698	0.220714	0.187053		808	0.173409	0.176704	0.251073
809	0.179201	0.222044	0.186919		809	0.174291	0.176914	0.249426
810	0.179303	0.224495	0.189051		810	0.173006	0.179293	0.248149
811	0.17555	0.225771	0.185051		811	0.17408	0.177757	0.246502
812	0.176406	0.225837	0.185992		812	0.173613	0.176146	0.243857
813	0.175095	0.226889	0.18506		813	0.173445	0.175441	0.245028
814	0.175164	0.226676	0.186379		814	0.174131	0.173394	0.245241
815	0.172742	0.22729	0.181634		815	0.175522	0.171225	0.247184
816	0.173931	0.229497	0.183336		816	0.174036	0.172497	0.251126
817	0.172899	0.229438	0.183599		817	0.173662	0.174404	0.250511
818	0.175148	0.229208	0.184811		818	0.172809	0.174636	0.248919
819	0.176158	0.229532	0.184909		819	0.171552	0.176976	0.249516
820	0.177264	0.228188	0.187411		820	0.170924	0.177481	0.247607
821	0.176547	0.227813	0.187596		821	0.171008	0.179817	0.24587
822	0.175927	0.22922	0.185344		822	0.1724	0.180934	0.246351
823	0.176015	0.229785	0.185185		823	0.173732	0.180569	0.246417
824	0.174684	0.230794	0.184725		824	0.174714	0.179542	0.245679
825	0.176002	0.23243	0.186304		825	0.177412	0.178894	0.242283
826	0.177879	0.233575	0.186293		826	0.179258	0.177577	0.241587
827	0.177604	0.23402	0.188113		827	0.179118	0.175558	0.240837
828	0.175032	0.234205	0.188515		828	0.180021	0.178014	0.239211
829	0.174516	0.234015	0.187686		829	0.180426	0.17776	0.236809
830	0.17259	0.233622	0.187007		830	0.180275	0.177993	0.239623
831	0.170998	0.233723	0.187968		831	0.180168	0.176532	0.236655
832	0.171518	0.234259	0.18935		832	0.179628	0.175752	0.233492
833	0.171746	0.237056	0.189989		833	0.17713	0.172946	0.232425
834	0.175455	0.238039	0.191108		834	0.17706	0.173181	0.232306
835	0.175561	0.238257	0.189983		835	0.174661	0.171686	0.228615
836	0.1774	0.238451	0.190369		836	0.174148	0.17291	0.22645
837	0.180056	0.240936	0.189498		837	0.173971	0.174756	0.228643
838	0.181943	0.239128	0.189418		838	0.175723	0.175783	0.229713
839	0.180803	0.241014	0.189739		839	0.174881	0.175223	0.228911
840	0.181895	0.242319	0.189869		840	0.176734	0.177842	0.228229
841	0.180052	0.242034	0.190027		841	0.175236	0.17835	0.228764
842	0.177885	0.238826	0.189757		842	0.174397	0.178179	0.226558
843	0.17733	0.239294	0.189736		843	0.173751	0.177648	0.222987
844	0.175525	0.238396	0.189273		844	0.172242	0.177691	0.221629
845	0.174843	0.238246	0.189307		845	0.170578	0.1767	0.221253
846	0.175181	0.237188	0.187652		846	0.172077	0.175418	0.220095
847	0.175876	0.237105	0.187545		847	0.172378	0.175063	0.21511
848	0.173891	0.236018	0.187931		848	0.171316	0.176864	0.213429
849	0.174833	0.23588	0.188479		849	0.171534	0.177385	0.211974
850	0.173852	0.235154	0.189286		850	0.170276	0.176524	0.209816
851	0.17406	0.235548	0.189857		851	0.170245	0.179723	0.206716
852	0.1738	0.237173	0.190114		852	0.169307	0.179639	0.208345
853	0.174502	0.237134	0.188148		853	0.170397	0.17754	0.208936
854	0.175573	0.234026	0.18656		854	0.171139	0.177386	0.208318
855	0.176292	0.234962	0.185414		855	0.172147	0.178507	0.207711
856	0.176148	0.234299	0.184546		856	0.171794	0.177031	0.207866
857	0.177598	0.234327	0.183951		857	0.172666	0.174933	0.210073
858	0.180787	0.236319	0.185183		858	0.171166	0.176397	0.210223
859	0.178641	0.237245	0.185516		859	0.171731	0.176994	0.2102
860	0.180576	0.236253	0.18502		860	0.171049	0.1786	0.213409
861	0.180285	0.237064	0.184826		861	0.169822	0.177853	0.213046
862	0.179852	0.235975	0.183037		862	0.169507	0.180173	0.20991
863	0.176913	0.236265	0.182465		863	0.169964	0.178953	0.206856
864	0.176567	0.238032	0.182034		864	0.170095	0.178342	0.204497
865	0.172779	0.238541	0.182598		865	0.171916	0.177153	0.2001
866	0.17474	0.239261	0.182876		866	0.172863	0.177201	0.199739
867	0.172578	0.23965	0.184654		867	0.173021	0.177326	0.196374
868	0.172623	0.237913	0.184625		868	0.17371	0.179479	0.193494
869	0.17372	0.239457	0.184516		869	0.173244	0.179578	0.191771
870	0.176254	0.239503	0.183007		870	0.173392	0.179493	0.190537
871	0.173698	0.238712	0.182543		871	0.174526	0.182334	0.189594
872	0.173447	0.239078	0.183193		872	0.17696	0.183157	0.19143
873	0.172483	0.240755	0.184003		873	0.178654	0.183483	0.192264
874	0.172641	0.239689	0.183741		874	0.181311	0.185251	0.191107
875	0.172433	0.239233	0.186038		875	0.183142	0.187772	0.191461
876	0.172039	0.24004	0.186292		876	0.186734	0.185651	0.190916
877	0.172884	0.241013	0.184732		877	0.189107	0.185083	0.190474
878	0.172922	0.240101	0.183783		878	0.191234	0.184185	0.190628
879	0.170877	0.241574	0.184563		879	0.193711	0.183846	0.190996
880	0.169989	0.2414	0.183799		880	0.196041	0.182626	0.189089
881	0.170295	0.24036	0.18396		881	0.195681	0.18355	0.188717
882	0.168589	0.23829	0.18363		882	0.196058	0.183939	0.187648
883	0.169241	0.235546	0.185444		883	0.196548	0.183331	0.185169
884	0.168319	0.232772	0.184295		884	0.196477	0.183676	0.186742
885	0.168408	0.232625	0.184659		885	0.199	0.181876	0.18574
886	0.170419	0.232549	0.184776		886	0.202695	0.18229	0.186677
887	0.171348	0.233489	0.18482		887	0.205641	0.181257	0.186863
888	0.172005	0.2362	0.184011		888	0.21017	0.183309	0.189636
889	0.172869	0.236236	0.186864		889	0.214865	0.182657	0.187179
890	0.173782	0.236528	0.188239		890	0.217746	0.182278	0.191345
891	0.173488	0.236568	0.187319		891	0.218782	0.181345	0.188871
892	0.174867	0.236342	0.187408		892	0.220661	0.183819	0.188056
893	0.175977	0.235131	0.186058		893	0.220746	0.183054	0.186176
894	0.177677	0.235969	0.18721		894	0.219305	0.1833	0.187748
895	0.178545	0.235719	0.18688		895	0.217035	0.184943	0.186595
896	0.178443	0.235859	0.190016		896	0.21568	0.184829	0.188838
897	0.176752	0.234842	0.191591		897	0.215721	0.18361	0.191299
898	0.177025	0.233706	0.193955		898	0.214927	0.181832	0.196492
899	0.177755	0.232981	0.19074		899	0.21649	0.181751	0.200945
900	0.179683	0.232915	0.191063		900	0.216025	0.181267	0.200206
901	0.180529	0.233035	0.188474		901	0.218261	0.180038	0.203096
902	0.182169	0.235693	0.189434		902	0.21746	0.177231	0.206205
903	0.18274	0.237813	0.188033		903	0.216442	0.180084	0.206229
904	0.185841	0.238679	0.190543		904	0.21415	0.180044	0.205764
905	0.183935	0.239927	0.188741		905	0.215358	0.180834	0.208884
906	0.183243	0.241629	0.190038		906	0.213748	0.18178	0.210989
907	0.185726	0.240185	0.189029		907	0.214965	0.184108	0.211435
908	0.185646	0.241165	0.18943		908	0.215659	0.181136	0.214135
909	0.182635	0.240783	0.187827		909	0.217262	0.182817	0.216245
910	0.183302	0.239458	0.187392		910	0.21693	0.182392	0.219157
911	0.184583	0.238084	0.186915		911	0.218064	0.182183	0.221001
912	0.183416	0.238744	0.184936		912	0.218348	0.182957	0.2223
913	0.183304	0.237279	0.185314		913	0.220636	0.184908	0.223326
914	0.183482	0.239115	0.185093		914	0.221177	0.183067	0.224783
915	0.184177	0.238174	0.185529		915	0.221385	0.185135	0.228123
916	0.183261	0.239493	0.186718		916	0.219038	0.186726	0.228618
917	0.182483	0.238037	0.187628		917	0.217124	0.18657	0.229673
918	0.182712	0.237942	0.188009		918	0.216796	0.185684	0.230419
919	0.184266	0.235318	0.18839		919	0.214055	0.188169	0.230011
920	0.184759	0.237492	0.188134		920	0.212763	0.187205	0.227742
921	0.183549	0.237055	0.187541		921	0.21231	0.186465	0.22874
922	0.185827	0.238346	0.187405		922	0.212633	0.185459	0.232355
923	0.188234	0.236944	0.185821		923	0.211514	0.185408	0.2321
924	0.186895	0.239279	0.185944		924	0.211966	0.184535	0.232083
925	0.184682	0.238826	0.187511		925	0.213086	0.185852	0.23536
926	0.186557	0.238588	0.187029		926	0.213451	0.18662	0.237082
927	0.185308	0.238706	0.189154		927	0.212306	0.187001	0.23402
928	0.181803	0.239467	0.190361		928	0.211187	0.187145	0.237674
929	0.183288	0.237646	0.191838		929	0.21052	0.187667	0.239002
930	0.184273	0.237965	0.191761		930	0.210031	0.187448	0.238645
931	0.184578	0.238057	0.191472		931	0.209759	0.186146	0.234989
932	0.186755	0.237518	0.189569		932	0.211239	0.187432	0.235885
933	0.188879	0.238628	0.188438		933	0.211905	0.189448	0.236818
934	0.189968	0.239608	0.187436		934	0.212491	0.189613	0.238048
935	0.190429	0.23949	0.187659		935	0.211557	0.189334	0.237196
936	0.191207	0.239488	0.187242		936	0.211651	0.192588	0.241003
937	0.188167	0.240782	0.188502		937	0.208182	0.191223	0.242223
938	0.187623	0.241782	0.189037		938	0.205911	0.189943	0.238753
939	0.186316	0.240374	0.188339		939	0.204574	0.18976	0.236267
940	0.186543	0.239638	0.188382		940	0.202769	0.189459	0.234225
941	0.186553	0.238795	0.189224		941	0.202476	0.188215	0.23264
942	0.186329	0.238495	0.18792		942	0.20377	0.189216	0.227966
943	0.186661	0.23671	0.18773		943	0.20452	0.191427	0.227117
944	0.185558	0.235817	0.187655		944	0.204606	0.191393	0.22634
945	0.185501	0.236771	0.186286		945	0.205925	0.194003	0.226053
946	0.184076	0.236405	0.18719		946	0.206232	0.195335	0.222904
947	0.184068	0.235234	0.18722		947	0.204187	0.196815	0.22253
948	0.18143	0.235597	0.188235		948	0.202637	0.194564	0.221697
949	0.180244	0.236177	0.188338		949	0.202407	0.194288	0.222118
950	0.178689	0.23345	0.187965		950	0.201984	0.190687	0.221118
951	0.179509	0.231833	0.186503		951	0.20107	0.191206	0.219717
952	0.179414	0.230183	0.18856		952	0.200631	0.18987	0.219894
953	0.18048	0.229785	0.188695		953	0.200229	0.190092	0.219938
954	0.181546	0.229273	0.18796		954	0.198198	0.191353	0.218017
955	0.181148	0.230206	0.187823		955	0.196613	0.192285	0.21838
956	0.180321	0.2296	0.187493		956	0.194567	0.187907	0.217818
957	0.179956	0.229526	0.183757		957	0.195423	0.187388	0.218784
958	0.181003	0.228094	0.183077		958	0.1949	0.187385	0.216611
959	0.179246	0.226703	0.183262		959	0.195419	0.18504	0.217798
960	0.178161	0.223344	0.182803		960	0.195117	0.186295	0.217201
961	0.176105	0.222666	0.181896		961	0.193805	0.187601	0.219209
962	0.175666	0.222002	0.18369		962	0.192072	0.188745	0.218815
963	0.176038	0.221058	0.183124		963	0.191065	0.188109	0.219799
964	0.175954	0.22207	0.184111		964	0.190445	0.189979	0.218782
965	0.177709	0.222967	0.186267		965	0.190282	0.190357	0.216736
966	0.179605	0.222741	0.186109		966	0.192093	0.192043	0.216834
967	0.180887	0.220823	0.184927		967	0.192537	0.192427	0.21649
968	0.178442	0.220209	0.184592		968	0.192881	0.193827	0.218488
969	0.180124	0.218773	0.184973		969	0.192075	0.192371	0.219403
970	0.180138	0.2187	0.18182		970	0.189981	0.189832	0.22318
971	0.180881	0.219534	0.181053		971	0.188233	0.188937	0.224388
972	0.18136	0.219538	0.181743		972	0.18706	0.190311	0.223328
973	0.182617	0.21986	0.182134		973	0.186088	0.190045	0.219642
974	0.183415	0.217771	0.179746		974	0.185087	0.190102	0.220102
975	0.183249	0.216713	0.180556		975	0.18554	0.190553	0.216735
976	0.183657	0.214585	0.182706		976	0.18516	0.191585	0.20986
977	0.183146	0.214468	0.18461		977	0.184005	0.190103	0.209135
978	0.182684	0.213452	0.184801		978	0.18277	0.190049	0.208541
979	0.181011	0.214713	0.186174		979	0.18306	0.192934	0.203977
980	0.179708	0.216068	0.187779		980	0.181705	0.193865	0.202697
981	0.178262	0.214875	0.188346		981	0.180401	0.192585	0.205663
982	0.177167	0.216446	0.185647		982	0.179251	0.194136	0.203953
983	0.178268	0.215769	0.183995		983	0.178343	0.192994	0.202893
984	0.180787	0.215544	0.182419		984	0.17703	0.190488	0.204393
985	0.182357	0.213901	0.180645		985	0.176244	0.189069	0.203363
986	0.182495	0.214222	0.178593		986	0.174801	0.188124	0.202029
987	0.182327	0.212276	0.180663		987	0.174682	0.186184	0.202598
988	0.180208	0.213659	0.181318		988	0.173811	0.188348	0.200205
989	0.179157	0.214056	0.181796		989	0.171957	0.187895	0.198479
990	0.179241	0.214485	0.18226		990	0.172421	0.189264	0.199162
991	0.177586	0.213871	0.183334		991	0.171841	0.189945	0.198824
992	0.179903	0.213597	0.181896		992	0.171703	0.189094	0.201029
993	0.180685	0.211358	0.180613		993	0.170263	0.187978	0.205542
994	0.178893	0.209219	0.181317		994	0.171345	0.186469	0.207657
995	0.177948	0.207744	0.181383		995	0.169277	0.186352	0.209687
996	0.177811	0.209241	0.180828		996	0.16985	0.186877	0.214445
997	0.176207	0.209384	0.180757		997	0.16907	0.186205	0.215241
998	0.1756	0.210335	0.18362		998	0.170414	0.185817	0.21408
999	0.176072	0.210643	0.181696		999	0.170789	0.188469	0.213919
1000	0.178081	0.21217	0.181437		1000	0.171488	0.186313	0.214759
1001	0.180112	0.21182	0.180955		1001	0.170934	0.18492	0.211651
1002	0.178596	0.21317	0.180258		1002	0.170105	0.18457	0.210592
1003	0.180388	0.212865	0.178849		1003	0.170197	0.182892	0.211049
1004	0.178932	0.214037	0.179683		1004	0.16854	0.181179	0.211229
1005	0.178626	0.213815	0.179443		1005	0.16924	0.182402	0.209686
1006	0.177918	0.213898	0.179203		1006	0.169559	0.182681	0.211636
1007	0.178173	0.213845	0.18182		1007	0.170857	0.185482	0.210436
1008	0.177982	0.213468	0.182212		1008	0.17058	0.186384	0.210326
1009	0.178715	0.213565	0.182038		1009	0.171581	0.186942	0.210542
1010	0.175881	0.213444	0.184071		1010	0.172407	0.186607	0.21162
1011	0.174496	0.21356	0.186409		1011	0.173641	0.18587	0.211147
1012	0.174615	0.211986	0.186194		1012	0.172383	0.184622	0.212111
1013	0.173672	0.21244	0.186063		1013	0.173346	0.184011	0.213002
1014	0.174846	0.212463	0.188508		1014	0.175017	0.183546	0.211082
1015	0.178143	0.212082	0.186726		1015	0.174001	0.183142	0.208265
1016	0.181337	0.210892	0.185216		1016	0.174409	0.184674	0.205037
1017	0.184743	0.211607	0.18448		1017	0.175509	0.184663	0.201628
1018	0.184965	0.212548	0.184649		1018	0.175884	0.184725	0.197758
1019	0.184828	0.211431	0.183685		1019	0.174633	0.185204	0.197509
1020	0.185266	0.212282	0.185042		1020	0.175022	0.185782	0.195394
1021	0.183222	0.213123	0.183904		1021	0.174443	0.185788	0.19434
1022	0.181923	0.212699	0.184644		1022	0.17474	0.184793	0.194519
1023	0.181693	0.212663	0.184411		1023	0.175131	0.184441	0.194401
1024	0.183364	0.214814	0.184519		1024	0.174678	0.18266	0.193634
1025	0.181291	0.21409	0.183808		1025	0.174439	0.180936	0.193898
1026	0.182063	0.214481	0.186154		1026	0.173743	0.179313	0.18965
1027	0.180672	0.213498	0.184257		1027	0.171949	0.178698	0.189789
1028	0.179431	0.211272	0.183633		1028	0.169813	0.177032	0.188043
1029	0.176412	0.208193	0.184581		1029	0.168165	0.178444	0.185873
1030	0.177134	0.207062	0.185916		1030	0.167055	0.181324	0.187597
1031	0.176117	0.20573	0.185612		1031	0.166901	0.18245	0.192084
1032	0.177949	0.205497	0.186411		1032	0.167721	0.183209	0.190244
1033	0.17807	0.206138	0.186742		1033	0.167841	0.184372	0.191083
1034	0.178953	0.205992	0.185286		1034	0.168118	0.184727	0.190285
1035	0.177737	0.20611	0.184127		1035	0.167057	0.185209	0.186793
1036	0.176619	0.206826	0.184107		1036	0.165846	0.183805	0.187075
1037	0.174959	0.207132	0.185196		1037	0.166303	0.181784	0.186366
1038	0.176067	0.207295	0.186961		1038	0.165173	0.182141	0.184369
1039	0.177147	0.208321	0.187648		1039	0.16443	0.179336	0.185724
1040	0.176962	0.208392	0.18737		1040	0.165472	0.176294	0.185145
1041	0.174962	0.20725	0.187134		1041	0.166744	0.17793	0.184434
1042	0.174863	0.207107	0.186833		1042	0.164504	0.178282	0.186136
1043	0.173826	0.206446	0.186587		1043	0.166485	0.177231	0.187933
1044	0.172868	0.20597	0.186819		1044	0.167407	0.178655	0.186955
1045	0.17073	0.206425	0.187225		1045	0.167833	0.178576	0.188237
1046	0.174328	0.207523	0.188666		1046	0.166998	0.177849	0.187323
1047	0.172806	0.206704	0.188919		1047	0.168003	0.178377	0.186671
1048	0.174649	0.206134	0.188672		1048	0.166741	0.178997	0.184998
1049	0.17348	0.205892	0.188345		1049	0.165915	0.178697	0.184362
1050	0.173951	0.204501	0.188851		1050	0.164336	0.178451	0.180915
1051	0.171218	0.201804	0.18775		1051	0.164718	0.178812	0.17927
1052	0.169886	0.203028	0.18773		1052	0.163817	0.180072	0.181234
1053	0.16932	0.204396	0.188235		1053	0.164823	0.181964	0.181225
1054	0.169873	0.205073	0.188686		1054	0.165981	0.181282	0.178748
1055	0.171131	0.204509	0.189457		1055	0.16671	0.181101	0.180856
1056	0.171754	0.207402	0.190002		1056	0.167435	0.181831	0.183901
1057	0.172395	0.206634	0.189926		1057	0.168963	0.180036	0.179891
1058	0.169346	0.207847	0.189139		1058	0.169682	0.178098	0.180436
1059	0.167615	0.20719	0.187827		1059	0.170979	0.178374	0.183191
1060	0.166805	0.209417	0.185294		1060	0.170302	0.180096	0.182654
1061	0.168672	0.208549	0.184997		1061	0.168559	0.177835	0.182455
1062	0.170214	0.209629	0.183119		1062	0.16851	0.178523	0.183048
1063	0.171871	0.207993	0.183343		1063	0.16701	0.180159	0.185539
1064	0.171842	0.208079	0.184846		1064	0.16506	0.178292	0.187391
1065	0.171076	0.20697	0.186293		1065	0.166638	0.178124	0.190027
1066	0.169577	0.206886	0.183939		1066	0.168013	0.179166	0.191644
1067	0.168427	0.205469	0.18503		1067	0.168071	0.177692	0.194501
1068	0.16818	0.203186	0.185238		1068	0.16841	0.176936	0.196638
1069	0.168192	0.202501	0.185826		1069	0.169768	0.180085	0.198995
1070	0.169583	0.201978	0.186262		1070	0.169102	0.17952	0.200306
1071	0.168201	0.201681	0.188482		1071	0.169235	0.180044	0.202197
1072	0.169001	0.201704	0.18895		1072	0.170317	0.181305	0.203356
1073	0.168835	0.203325	0.187063		1073	0.171712	0.180189	0.202203
1074	0.167678	0.203535	0.187157		1074	0.171123	0.178867	0.204936
1075	0.165331	0.204841	0.186203		1075	0.170549	0.179184	0.205463
1076	0.165168	0.204933	0.18662		1076	0.17158	0.176455	0.203189
1077	0.163452	0.204719	0.185807		1077	0.17055	0.176538	0.204204
1078	0.164676	0.203593	0.186742		1078	0.1693	0.178537	0.2065
1079	0.166788	0.203762	0.184014		1079	0.169484	0.178831	0.203505
1080	0.168748	0.203304	0.181623		1080	0.170257	0.176843	0.204301
1081	0.169289	0.202933	0.179137		1081	0.16839	0.180833	0.205095
1082	0.171122	0.203702	0.180054		1082	0.168752	0.181306	0.204829
1083	0.169839	0.204764	0.180671		1083	0.169466	0.17923	0.204849
1084	0.166997	0.20525	0.182145		1084	0.168661	0.180645	0.20704
1085	0.166113	0.205725	0.184904		1085	0.169671	0.181161	0.209002
1086	0.165981	0.205061	0.186116		1086	0.171707	0.178671	0.209648
1087	0.164138	0.204816	0.185911		1087	0.171699	0.178544	0.209545
1088	0.16323	0.203545	0.185346		1088	0.17127	0.179597	0.207766
1089	0.164714	0.204903	0.185249		1089	0.172612	0.177651	0.205477
1090	0.164498	0.204289	0.185899		1090	0.17298	0.177615	0.205286
1091	0.164626	0.20568	0.185897		1091	0.173359	0.176925	0.205756
1092	0.16594	0.206504	0.186284		1092	0.1746	0.175874	0.207031
1093	0.165262	0.208983	0.187821		1093	0.1742	0.174184	0.208141
1094	0.164143	0.206895	0.18504		1094	0.173937	0.172824	0.209326
1095	0.163936	0.20774	0.183351		1095	0.17408	0.175104	0.209655
1096	0.161993	0.207917	0.182383		1096	0.172257	0.17694	0.214318
1097	0.15881	0.207797	0.180933		1097	0.172406	0.175629	0.215618
1098	0.159384	0.207089	0.178547		1098	0.172845	0.176869	0.218084
1099	0.160368	0.208161	0.180362		1099	0.172557	0.177798	0.22089
1100	0.159289	0.210336	0.180053		1100	0.172619	0.174724	0.220472
1101	0.160582	0.209641	0.181338		1101	0.173375	0.173575	0.219041
1102	0.162424	0.21084	0.181525		1102	0.172111	0.175199	0.218694
1103	0.163496	0.212464	0.183539		1103	0.172688	0.174227	0.220647
1104	0.16311	0.212107	0.184234		1104	0.171203	0.174958	0.220841
1105	0.163235	0.210313	0.183323		1105	0.169358	0.176825	0.223536
1106	0.164995	0.210073	0.181941		1106	0.169154	0.175168	0.22207
1107	0.166827	0.21035	0.181936		1107	0.169139	0.175267	0.223289
1108	0.164479	0.210596	0.181915		1108	0.167401	0.174606	0.219011
1109	0.165163	0.210962	0.181905		1109	0.168183	0.174925	0.219212
1110	0.1658	0.211298	0.184472		1110	0.168629	0.172936	0.217416
1111	0.165058	0.212502	0.186638		1111	0.167635	0.172743	0.218986
1112	0.163273	0.211685	0.188063		1112	0.166272	0.17427	0.217902
1113	0.164249	0.211831	0.1867		1113	0.167222	0.173103	0.218437
1114	0.162931	0.21195	0.186375		1114	0.166364	0.17143	0.218143
1115	0.163577	0.211288	0.186234		1115	0.165145	0.173581	0.217554
1116	0.164095	0.211553	0.183179		1116	0.164491	0.174894	0.218796
1117	0.165681	0.211039	0.181767		1117	0.165395	0.172938	0.218059
1118	0.165831	0.211382	0.180384		1118	0.1646	0.174918	0.219034
1119	0.167738	0.2117	0.180946		1119	0.165662	0.175864	0.216235
1120	0.167346	0.212559	0.178896		1120	0.165046	0.17577	0.215084
1121	0.167803	0.213105	0.181111		1121	0.165868	0.174808	0.211919
1122	0.167308	0.213462	0.182149		1122	0.166103	0.17449	0.212497
1123	0.167032	0.212255	0.183892		1123	0.165329	0.175603	0.213312
1124	0.16772	0.214239	0.183285		1124	0.164002	0.175915	0.214826
1125	0.169076	0.2147	0.184485		1125	0.163983	0.173896	0.215324
1126	0.168321	0.215279	0.185604		1126	0.161451	0.174625	0.216983
1127	0.167578	0.218547	0.184791		1127	0.160725	0.174121	0.215359
1128	0.169593	0.22065	0.186326		1128	0.159839	0.172512	0.212404
1129	0.169782	0.22076	0.187229		1129	0.159417	0.170915	0.212824
1130	0.169248	0.221313	0.188407		1130	0.159358	0.173304	0.21478
1131	0.168326	0.22278	0.186517		1131	0.16143	0.174353	0.212688
1132	0.170928	0.221855	0.18603		1132	0.159456	0.174204	0.215005
1133	0.171197	0.22334	0.184443		1133	0.160455	0.173709	0.221527
1134	0.169702	0.223749	0.183175		1134	0.16175	0.172144	0.225541
1135	0.170767	0.224722	0.182828		1135	0.162055	0.171425	0.228349
1136	0.171778	0.223571	0.183668		1136	0.162064	0.170572	0.234254
1137	0.170024	0.221653	0.18561		1137	0.164864	0.173927	0.239167
1138	0.169891	0.219951	0.185889		1138	0.165893	0.174518	0.237903
1139	0.170969	0.219175	0.18587		1139	0.166465	0.176861	0.240646
1140	0.17062	0.218762	0.185288		1140	0.167426	0.175312	0.243772
1141	0.172299	0.220611	0.185802		1141	0.168736	0.174945	0.244456
1142	0.172648	0.222061	0.183951		1142	0.168476	0.172857	0.246308
1143	0.173112	0.222576	0.183926		1143	0.168096	0.173199	0.248827
1144	0.173742	0.222244	0.183088		1144	0.16845	0.173548	0.24903
1145	0.17583	0.222717	0.183718		1145	0.169158	0.172879	0.248497
1146	0.175136	0.222475	0.181998		1146	0.167677	0.174296	0.249738
1147	0.176468	0.222731	0.18271		1147	0.167077	0.173198	0.249188
1148	0.178487	0.224516	0.184219		1148	0.167321	0.174237	0.24803
1149	0.180623	0.226444	0.18579		1149	0.167624	0.175364	0.245262
1150	0.181968	0.225074	0.183973		1150	0.167662	0.17732	0.242891
1151	0.184404	0.222856	0.185396		1151	0.16858	0.177169	0.238965
1152	0.184855	0.225615	0.184303		1152	0.169224	0.178928	0.236693
1153	0.186357	0.22503	0.18147		1153	0.170404	0.178064	0.237194
1154	0.186116	0.224948	0.17999		1154	0.171257	0.177123	0.238218
1155	0.18677	0.228914	0.18139		1155	0.172991	0.179164	0.237975
1156	0.186968	0.232879	0.181523		1156	0.173369	0.179884	0.236383
1157	0.189642	0.231993	0.18274		1157	0.175502	0.180026	0.232155
1158	0.188203	0.231881	0.182613		1158	0.175747	0.177818	0.228382
1159	0.188271	0.233481	0.183213		1159	0.175744	0.177262	0.226138
1160	0.187561	0.233782	0.182329		1160	0.176369	0.174059	0.224168
1161	0.187993	0.235089	0.182854		1161	0.178892	0.171924	0.225986
1162	0.185599	0.236272	0.181071		1162	0.17875	0.171312	0.227352
1163	0.18633	0.237617	0.18363		1163	0.180727	0.173483	0.227886
1164	0.186201	0.237415	0.185614		1164	0.181249	0.174421	0.225357
1165	0.184581	0.236875	0.185369		1165	0.182167	0.173745	0.225867
1166	0.182972	0.235355	0.182654		1166	0.181761	0.174026	0.22305
1167	0.184036	0.236559	0.185987		1167	0.183098	0.173886	0.221725
1168	0.183673	0.238738	0.184533		1168	0.183343	0.173553	0.219982
1169	0.184011	0.240176	0.184038		1169	0.185606	0.174716	0.217963
1170	0.186332	0.238618	0.185417		1170	0.184415	0.175468	0.2138
1171	0.187091	0.238988	0.187436		1171	0.184014	0.176012	0.213144
1172	0.187397	0.237234	0.184941		1172	0.183931	0.174736	0.212678
1173	0.1854	0.235495	0.187273		1173	0.185009	0.174755	0.212453
1174	0.186037	0.234945	0.187246		1174	0.184332	0.173149	0.212392
1175	0.184484	0.235438	0.187764		1175	0.185628	0.172957	0.215663
1176	0.183968	0.235261	0.188239		1176	0.187894	0.17465	0.215581
1177	0.181799	0.235604	0.188923		1177	0.189522	0.175677	0.215148
1178	0.181764	0.235797	0.188605		1178	0.189595	0.177153	0.215366
1179	0.18015	0.234641	0.187997		1179	0.190736	0.178183	0.215651
1180	0.179642	0.234643	0.188782		1180	0.19214	0.178745	0.213992
1181	0.178097	0.234801	0.186488		1181	0.193047	0.17564	0.211748
1182	0.179252	0.234739	0.187351		1182	0.194008	0.174554	0.213163
1183	0.17885	0.233141	0.184165		1183	0.195394	0.172453	0.212876
1184	0.179485	0.233418	0.184881		1184	0.19762	0.171622	0.216004
1185	0.177788	0.235107	0.184316		1185	0.198298	0.171068	0.216125
1186	0.177494	0.235264	0.186079		1186	0.199324	0.174039	0.219288
1187	0.176857	0.235787	0.186252		1187	0.200875	0.175223	0.217773
1188	0.176694	0.238235	0.18822		1188	0.20153	0.175906	0.220327
1189	0.175062	0.240514	0.190429		1189	0.201835	0.175441	0.217467
1190	0.17531	0.238505	0.190035		1190	0.203703	0.176288	0.217338
1191	0.176774	0.241485	0.190958		1191	0.205988	0.175082	0.215783
1192	0.175919	0.241138	0.191761		1192	0.206799	0.175845	0.215761
1193	0.176639	0.240976	0.190285		1193	0.209222	0.17584	0.21041
1194	0.178314	0.242271	0.187903		1194	0.213253	0.17503	0.20876
1195	0.178123	0.244243	0.188545		1195	0.215913	0.176093	0.204958
1196	0.177452	0.242435	0.188118		1196	0.21794	0.176511	0.202686
1197	0.177165	0.24247	0.18594		1197	0.222868	0.17575	0.197342
1198	0.176679	0.241633	0.186415		1198	0.227267	0.176724	0.19688
1199	0.177191	0.23791	0.186627		1199	0.228857	0.178329	0.197715
1200	0.176904	0.23745	0.186137		1200	0.231642	0.178099	0.199463

## Sheet: graph
Figure3A
Fluctuation-positive cells (%)					Fluctuation amplitude (ΔF340/F380)
Vehicle		CNP (300 nM)			Vehicle		CNP (300 nM)
Basal	+ Paxilline	Basal	+Paxilline		Basal	+ Paxilline	Basal	+Paxilline
36.6667	36.6667	66.6667	53.3333		0.0480874	0.0352864	0.0747169	0.0421487
50	50	80	56.6667		0.054228	0.0446792	0.0651005	0.0399061
43.3333	43.3333	63.3333	50		0.0564965	0.0404941	0.0842629	0.0429718
36.6667	50	56.6667	30		0.0480431	0.0410706	0.0600832	0.0359395
