# Supplementary material for: C-type natriuretic peptide facilitates autonomic Ca2+ entry in growth plate chondrocytes for stimulating bone growth
Source: eLife. 2022 Mar 15;11:e71931. doi: 10.7554/eLife.71931 (PMC8923661; doi:10.7554/eLife.71931)
Supplement: Figure 3—source data 2. [file elife-71931-fig3-data2.xlsx]

## Sheet: trace
Figure 3B
NS1619 (30 mM)
Npr2fl/fl, Col2a1-Cre-/-					Npr2fl/fl, Col2a1-Cre+/-
Times (s)	Cell1	Cell2	Cell3		Times (s)	Cell1	Cell2	Cell3
0	0.227371	0.174567	0.195688		0	0.214716	0.211142	0.175524
1	0.226058	0.174549	0.197219		1	0.213347	0.212771	0.175503
2	0.224185	0.173527	0.195168		2	0.212478	0.212722	0.175009
3	0.223766	0.17372	0.193774		3	0.211127	0.211272	0.171694
4	0.223054	0.171703	0.195886		4	0.209333	0.215106	0.170488
5	0.223491	0.171214	0.196693		5	0.213089	0.21402	0.169598
6	0.222224	0.172522	0.192637		6	0.214552	0.211764	0.169902
7	0.226182	0.173141	0.194661		7	0.218217	0.211991	0.168701
8	0.225986	0.172459	0.195736		8	0.219981	0.213192	0.170391
9	0.227294	0.17194	0.195125		9	0.219975	0.212692	0.169892
10	0.228136	0.171172	0.191231		10	0.219413	0.213958	0.168051
11	0.229804	0.168112	0.19318		11	0.22051	0.215311	0.167166
12	0.228643	0.167185	0.191848		12	0.219582	0.216173	0.168465
13	0.228944	0.166193	0.18807		13	0.220602	0.216127	0.168543
14	0.229944	0.166805	0.186552		14	0.222291	0.21691	0.169536
15	0.228507	0.166098	0.19001		15	0.222176	0.218066	0.170524
16	0.228195	0.167085	0.190418		16	0.221208	0.218182	0.171121
17	0.227214	0.168104	0.192838		17	0.222483	0.218455	0.169924
18	0.22712	0.169069	0.192738		18	0.222806	0.219246	0.1683
19	0.223813	0.169116	0.194784		19	0.222942	0.217882	0.168341
20	0.222304	0.169477	0.190556		20	0.221956	0.218289	0.170995
21	0.222257	0.168944	0.186491		21	0.223819	0.218534	0.170949
22	0.221035	0.167845	0.18319		22	0.22324	0.216851	0.170309
23	0.220994	0.167935	0.183908		23	0.223728	0.215075	0.172124
24	0.224014	0.168879	0.183724		24	0.224236	0.216881	0.170962
25	0.223243	0.168791	0.187491		25	0.224962	0.215411	0.169611
26	0.224893	0.169865	0.190249		26	0.22379	0.214477	0.167534
27	0.223243	0.170061	0.191439		27	0.221035	0.214902	0.169692
28	0.221916	0.169968	0.193184		28	0.220943	0.215461	0.170332
29	0.220127	0.168787	0.193866		29	0.221031	0.213495	0.171104
30	0.221602	0.170034	0.193179		30	0.218972	0.213088	0.17094
31	0.21982	0.168725	0.195121		31	0.219582	0.213795	0.17189
32	0.222652	0.168585	0.195086		32	0.221459	0.214128	0.171134
33	0.221543	0.168577	0.196819		33	0.221849	0.21425	0.171615
34	0.220802	0.169025	0.196756		34	0.221693	0.212873	0.171834
35	0.220795	0.16768	0.198002		35	0.224699	0.212589	0.170195
36	0.222157	0.168151	0.195898		36	0.222562	0.213119	0.170708
37	0.223204	0.168799	0.19733		37	0.221553	0.211137	0.169541
38	0.225956	0.169058	0.193088		38	0.221016	0.210694	0.167311
39	0.226142	0.169508	0.189151		39	0.220738	0.209822	0.167078
40	0.226759	0.17228	0.192915		40	0.221721	0.21015	0.168795
41	0.223119	0.171819	0.198012		41	0.222928	0.209038	0.168163
42	0.223903	0.174865	0.198851		42	0.224344	0.209145	0.17077
43	0.221999	0.173178	0.201001		43	0.225327	0.209781	0.170932
44	0.220664	0.17392	0.204502		44	0.224726	0.211585	0.173178
45	0.221296	0.171797	0.20085		45	0.223216	0.211999	0.173268
46	0.225393	0.172079	0.199366		46	0.225402	0.210263	0.173862
47	0.221937	0.168535	0.197075		47	0.224926	0.21033	0.172499
48	0.223444	0.170866	0.195162		48	0.223499	0.20775	0.173105
49	0.224925	0.167643	0.194045		49	0.226974	0.2071	0.171237
50	0.225222	0.168263	0.195526		50	0.226591	0.206175	0.170058
51	0.223277	0.167619	0.193595		51	0.226708	0.206157	0.170122
52	0.224411	0.168647	0.195277		52	0.227773	0.205637	0.170245
53	0.22065	0.169646	0.200473		53	0.228907	0.205082	0.168869
54	0.219059	0.168829	0.198589		54	0.228335	0.202681	0.170247
55	0.215794	0.168902	0.199424		55	0.230772	0.199984	0.170292
56	0.216385	0.169567	0.201844		56	0.231033	0.198639	0.171269
57	0.214804	0.167334	0.207823		57	0.233212	0.199921	0.171301
58	0.215802	0.165027	0.206624		58	0.232178	0.198464	0.173422
59	0.215613	0.16718	0.211099		59	0.231992	0.198225	0.171647
60	0.215515	0.166299	0.211733		60	0.230446	0.199577	0.171381
61	0.216154	0.165191	0.209228		61	0.230943	0.201484	0.170017
62	0.216332	0.168145	0.203787		62	0.229582	0.197649	0.171074
63	0.217757	0.167825	0.2035		63	0.229807	0.198389	0.170959
64	0.217512	0.170066	0.202139		64	0.229599	0.19964	0.171641
65	0.219014	0.173743	0.198452		65	0.231358	0.19716	0.172281
66	0.218236	0.174865	0.198206		66	0.2304	0.196096	0.171007
67	0.217312	0.174358	0.199193		67	0.23136	0.198703	0.168903
68	0.215534	0.174823	0.199642		68	0.229753	0.200616	0.168573
69	0.216579	0.173717	0.204612		69	0.229607	0.20033	0.168142
70	0.21615	0.170472	0.202265		70	0.229024	0.203621	0.167577
71	0.214022	0.170417	0.203438		71	0.227186	0.202799	0.168752
72	0.216825	0.167989	0.205155		72	0.225924	0.199977	0.170399
73	0.217082	0.169194	0.205333		73	0.229284	0.198696	0.169949
74	0.217345	0.168996	0.20402		74	0.225851	0.197597	0.168839
75	0.219125	0.169649	0.207254		75	0.224673	0.197291	0.168604
76	0.220396	0.17059	0.207325		76	0.225472	0.198608	0.168914
77	0.220477	0.171033	0.203077		77	0.224909	0.199281	0.169208
78	0.222408	0.17106	0.206273		78	0.223702	0.198972	0.167565
79	0.223271	0.170345	0.201341		79	0.227232	0.200315	0.168655
80	0.222163	0.169716	0.2038		80	0.227502	0.198988	0.170647
81	0.223881	0.168252	0.20445		81	0.22855	0.19712	0.170283
82	0.222231	0.16921	0.205184		82	0.228057	0.198265	0.168371
83	0.221747	0.16933	0.199538		83	0.227321	0.197205	0.1693
84	0.222709	0.170228	0.197189		84	0.224331	0.197072	0.16893
85	0.224054	0.169736	0.192559		85	0.224732	0.195548	0.166572
86	0.222644	0.170092	0.191461		86	0.225999	0.195412	0.166274
87	0.221822	0.170233	0.191196		87	0.224748	0.193396	0.167151
88	0.223027	0.169198	0.19112		88	0.225362	0.194341	0.168458
89	0.223322	0.167135	0.193411		89	0.225702	0.190856	0.169999
90	0.220759	0.168421	0.193402		90	0.224969	0.19289	0.170504
91	0.221956	0.168179	0.191603		91	0.222257	0.19374	0.170274
92	0.221581	0.166818	0.190632		92	0.222926	0.195929	0.170138
93	0.21863	0.16679	0.188735		93	0.222003	0.197486	0.170583
94	0.217444	0.168038	0.187848		94	0.220058	0.201538	0.168904
95	0.215922	0.166333	0.190242		95	0.218682	0.202666	0.169234
96	0.218066	0.164654	0.190291		96	0.217426	0.204103	0.169715
97	0.222552	0.165165	0.189613		97	0.215337	0.203667	0.169625
98	0.22635	0.166004	0.190699		98	0.213472	0.204242	0.169391
99	0.227602	0.166428	0.191483		99	0.215576	0.202581	0.171087
100	0.22922	0.166217	0.190704		100	0.215021	0.204216	0.171751
101	0.230457	0.16869	0.192706		101	0.215154	0.205389	0.172244
102	0.23112	0.169353	0.194172		102	0.216105	0.205227	0.17152
103	0.232821	0.169536	0.195782		103	0.215543	0.2051	0.171366
104	0.234295	0.169481	0.193851		104	0.21485	0.206313	0.170112
105	0.238227	0.171211	0.196805		105	0.216187	0.204658	0.169409
106	0.237772	0.17127	0.195552		106	0.216346	0.202039	0.166145
107	0.237852	0.172133	0.193296		107	0.215947	0.202776	0.167494
108	0.236026	0.169311	0.190154		108	0.218017	0.201026	0.166066
109	0.238837	0.169704	0.190811		109	0.218988	0.201613	0.167496
110	0.241902	0.169262	0.187948		110	0.217539	0.201831	0.165946
111	0.242388	0.170398	0.185358		111	0.216083	0.203283	0.168821
112	0.243556	0.16993	0.185803		112	0.218433	0.202785	0.166795
113	0.246092	0.171462	0.186364		113	0.217978	0.202984	0.16602
114	0.245242	0.172333	0.186681		114	0.21714	0.202544	0.164308
115	0.244711	0.171506	0.185322		115	0.217257	0.201373	0.165828
116	0.244604	0.170355	0.186416		116	0.219178	0.201015	0.163759
117	0.245126	0.169562	0.187373		117	0.218156	0.202375	0.163869
118	0.244411	0.169433	0.184971		118	0.21692	0.201883	0.165231
119	0.243217	0.166892	0.183594		119	0.215721	0.202375	0.16498
120	0.242153	0.167262	0.182817		120	0.219329	0.203077	0.162415
121	0.242131	0.16574	0.184151		121	0.221348	0.202006	0.162946
122	0.242646	0.166072	0.183965		122	0.221132	0.201296	0.164017
123	0.243827	0.166232	0.187585		123	0.222562	0.202709	0.165202
124	0.246629	0.168904	0.190468		124	0.224379	0.201866	0.165863
125	0.248629	0.170178	0.192859		125	0.223159	0.201166	0.16835
126	0.249587	0.172107	0.190384		126	0.223671	0.205594	0.168309
127	0.249952	0.170546	0.190656		127	0.226029	0.206876	0.166895
128	0.251643	0.169975	0.190418		128	0.225832	0.207467	0.164374
129	0.25241	0.16721	0.189782		129	0.228313	0.208622	0.162757
130	0.251974	0.164885	0.185549		130	0.229415	0.212385	0.161103
131	0.252643	0.163431	0.185637		131	0.228244	0.209654	0.159601
132	0.251505	0.164315	0.183481		132	0.228755	0.207897	0.16013
133	0.251498	0.165044	0.182205		133	0.230872	0.206578	0.160951
134	0.248083	0.168397	0.179066		134	0.230778	0.205835	0.162322
135	0.245515	0.168705	0.180922		135	0.227634	0.201433	0.164141
136	0.243555	0.168293	0.18369		136	0.228365	0.200718	0.166142
137	0.242285	0.169338	0.186447		137	0.226401	0.201055	0.16616
138	0.241713	0.169087	0.188509		138	0.227175	0.198588	0.164366
139	0.243477	0.165941	0.191425		139	0.227216	0.197383	0.163797
140	0.243592	0.165787	0.19182		140	0.231268	0.197904	0.162103
141	0.245714	0.167167	0.190435		141	0.232085	0.196171	0.161989
142	0.245477	0.166304	0.191641		142	0.234364	0.19433	0.161841
143	0.244645	0.165644	0.191874		143	0.234209	0.194334	0.165534
144	0.240549	0.166032	0.191487		144	0.233717	0.193653	0.166617
145	0.239213	0.166504	0.19115		145	0.233797	0.193511	0.167595
146	0.237919	0.168087	0.19021		146	0.235156	0.19323	0.167641
147	0.240288	0.166025	0.188486		147	0.237388	0.192281	0.168455
148	0.23922	0.166459	0.186361		148	0.240337	0.192661	0.166576
149	0.24385	0.166673	0.188086		149	0.244749	0.192783	0.165159
150	0.244639	0.167644	0.191889		150	0.247163	0.191495	0.164458
151	0.244206	0.16536	0.193191		151	0.248071	0.192826	0.165205
152	0.244106	0.167296	0.192271		152	0.249169	0.195566	0.164882
153	0.24717	0.167404	0.193159		153	0.248669	0.194624	0.162844
154	0.244761	0.168488	0.19223		154	0.245846	0.193895	0.162215
155	0.246927	0.168719	0.189882		155	0.247849	0.195576	0.16389
156	0.248152	0.168943	0.19103		156	0.247777	0.194338	0.162841
157	0.24719	0.169026	0.192638		157	0.245864	0.192352	0.160701
158	0.242789	0.169382	0.191547		158	0.247279	0.193102	0.163181
159	0.243773	0.168234	0.189485		159	0.249463	0.193729	0.164226
160	0.247627	0.16661	0.184597		160	0.245161	0.19234	0.163506
161	0.247043	0.166998	0.181267		161	0.245191	0.191455	0.162411
162	0.249573	0.168304	0.177938		162	0.24672	0.192031	0.166071
163	0.255029	0.168066	0.178336		163	0.245711	0.192715	0.165693
164	0.255754	0.168091	0.178853		164	0.247092	0.192092	0.165068
165	0.25408	0.169704	0.179488		165	0.247802	0.193012	0.163868
166	0.255853	0.170333	0.183394		166	0.246811	0.194405	0.164147
167	0.259673	0.167793	0.184857		167	0.246574	0.194703	0.160987
168	0.260103	0.168538	0.185204		168	0.245938	0.193588	0.160514
169	0.262262	0.169411	0.189107		169	0.242466	0.193756	0.161044
170	0.263872	0.169639	0.192498		170	0.241084	0.19179	0.160074
171	0.264323	0.168703	0.189333		171	0.241726	0.191424	0.160694
172	0.26004	0.172573	0.188467		172	0.239734	0.192886	0.162231
173	0.25879	0.171537	0.187769		173	0.240219	0.193502	0.162067
174	0.258379	0.170567	0.184946		174	0.240601	0.194104	0.16193
175	0.256056	0.169687	0.185394		175	0.241599	0.195829	0.163222
176	0.256518	0.16858	0.186568		176	0.242203	0.197473	0.163602
177	0.255037	0.166275	0.187221		177	0.242783	0.197193	0.164002
178	0.252275	0.167023	0.188736		178	0.242516	0.200027	0.165857
179	0.252414	0.166846	0.188903		179	0.241308	0.199257	0.167364
180	0.250395	0.16717	0.188478		180	0.239609	0.199539	0.167826
181	0.250178	0.168552	0.187822		181	0.236411	0.19865	0.169222
182	0.2493	0.168045	0.187873		182	0.235166	0.19832	0.167764
183	0.250088	0.165771	0.18704		183	0.232147	0.195941	0.167136
184	0.244138	0.16518	0.181754		184	0.230592	0.197231	0.165394
185	0.242702	0.165386	0.180971		185	0.231227	0.198347	0.165261
186	0.239182	0.165675	0.183911		186	0.230027	0.199155	0.164192
187	0.240404	0.166281	0.183686		187	0.229392	0.201982	0.165294
188	0.23926	0.167367	0.182226		188	0.227664	0.20347	0.16333
189	0.2396	0.16878	0.184682		189	0.226243	0.203132	0.163379
190	0.237658	0.168463	0.186476		190	0.222925	0.202098	0.162978
191	0.236361	0.167434	0.180859		191	0.222546	0.200444	0.162511
192	0.234352	0.168048	0.179754		192	0.219101	0.197128	0.160354
193	0.231305	0.170516	0.183529		193	0.216865	0.194924	0.162722
194	0.234101	0.169786	0.18269		194	0.218527	0.194657	0.162894
195	0.234961	0.169999	0.181692		195	0.217852	0.193333	0.166267
196	0.235792	0.169882	0.184584		196	0.216622	0.193779	0.166288
197	0.234515	0.169157	0.184872		197	0.217948	0.194492	0.167869
198	0.233692	0.167693	0.182362		198	0.220218	0.196026	0.167587
199	0.228296	0.168479	0.18539		199	0.221616	0.19585	0.167571
200	0.227763	0.168632	0.189045		200	0.22297	0.196643	0.165253
201	0.224982	0.169807	0.189789		201	0.224797	0.19831	0.16759
202	0.223191	0.171236	0.193952		202	0.224174	0.197543	0.16853
203	0.223411	0.170182	0.193951		203	0.222727	0.197081	0.170173
204	0.225891	0.168556	0.196323		204	0.22001	0.197726	0.172375
205	0.227125	0.169243	0.197202		205	0.219494	0.196519	0.172305
206	0.22863	0.168776	0.196701		206	0.217859	0.195731	0.170501
207	0.229921	0.167652	0.192358		207	0.218188	0.194691	0.171388
208	0.230872	0.167441	0.194264		208	0.217493	0.194221	0.169875
209	0.22965	0.168791	0.194851		209	0.21625	0.193858	0.168047
210	0.228799	0.168136	0.191989		210	0.216057	0.194959	0.168494
211	0.228716	0.168455	0.190306		211	0.21621	0.193182	0.168702
212	0.227486	0.167727	0.190515		212	0.21446	0.193501	0.1678
213	0.226674	0.168673	0.189546		213	0.215016	0.191782	0.166714
214	0.226495	0.167455	0.18725		214	0.214945	0.190559	0.168972
215	0.225852	0.166551	0.185895		215	0.214641	0.191959	0.169291
216	0.223961	0.167231	0.19003		216	0.214868	0.191597	0.168865
217	0.223301	0.167866	0.194285		217	0.21577	0.193661	0.167567
218	0.222876	0.167388	0.195048		218	0.21625	0.196293	0.170277
219	0.225034	0.169672	0.193302		219	0.217072	0.199513	0.167668
220	0.224494	0.170095	0.193002		220	0.218164	0.197699	0.167238
221	0.225638	0.170471	0.193792		221	0.218005	0.19955	0.168073
222	0.22689	0.17154	0.192409		222	0.218558	0.198744	0.168172
223	0.225904	0.17277	0.193002		223	0.219081	0.199179	0.165061
224	0.223093	0.174145	0.197228		224	0.220063	0.198381	0.165152
225	0.223334	0.17339	0.195028		225	0.220173	0.201774	0.164547
226	0.221077	0.171736	0.193452		226	0.222136	0.202934	0.162289
227	0.221637	0.171649	0.190448		227	0.219883	0.205209	0.163294
228	0.223438	0.172369	0.191437		228	0.220575	0.208133	0.163969
229	0.222903	0.170139	0.188069		229	0.222897	0.209593	0.164459
230	0.222213	0.171389	0.190337		230	0.222446	0.210022	0.163429
231	0.224148	0.171425	0.18931		231	0.220261	0.211408	0.165319
232	0.222363	0.17031	0.189018		232	0.223115	0.211172	0.164394
233	0.220013	0.16901	0.183764		233	0.225063	0.210545	0.164812
234	0.218064	0.167172	0.184181		234	0.22226	0.209597	0.162029
235	0.216815	0.165237	0.183111		235	0.221094	0.20892	0.162548
236	0.215326	0.166262	0.181657		236	0.22188	0.207774	0.164134
237	0.213555	0.16524	0.184223		237	0.223504	0.206422	0.16433
238	0.214083	0.166295	0.188923		238	0.223102	0.204781	0.164819
239	0.215696	0.166199	0.187539		239	0.223565	0.20346	0.166953
240	0.216838	0.168816	0.186631		240	0.224264	0.201527	0.167252
241	0.215589	0.167697	0.189063		241	0.224099	0.20023	0.165176
242	0.218193	0.168324	0.185804		242	0.220835	0.200466	0.1654
243	0.218463	0.167767	0.183902		243	0.218561	0.20056	0.164225
244	0.220505	0.170877	0.184399		244	0.219179	0.202995	0.164525
245	0.221078	0.167867	0.187298		245	0.220882	0.202026	0.164051
246	0.222633	0.167835	0.186755		246	0.219512	0.202185	0.163936
247	0.222291	0.166316	0.191679		247	0.221333	0.202737	0.163229
248	0.223209	0.164817	0.190612		248	0.220704	0.204126	0.162702
249	0.221238	0.163798	0.191055		249	0.221021	0.203716	0.162096
250	0.218253	0.166223	0.192765		250	0.219639	0.206177	0.162311
251	0.21795	0.166519	0.193314		251	0.222048	0.208366	0.160574
252	0.215006	0.168199	0.189476		252	0.221593	0.208854	0.161644
253	0.213793	0.169288	0.194353		253	0.223841	0.207241	0.162563
254	0.213371	0.169042	0.193147		254	0.225878	0.207014	0.162348
255	0.214662	0.16938	0.188685		255	0.226873	0.203938	0.161722
256	0.213382	0.168932	0.185465		256	0.227974	0.203461	0.162958
257	0.215413	0.167114	0.188442		257	0.229501	0.204034	0.16285
258	0.216931	0.166326	0.183651		258	0.230145	0.20493	0.163999
259	0.218021	0.165732	0.183584		259	0.230222	0.204975	0.166918
260	0.219324	0.163675	0.185919		260	0.232449	0.208088	0.168063
261	0.220408	0.164733	0.188706		261	0.232444	0.206829	0.170754
262	0.220311	0.165358	0.18584		262	0.234446	0.205653	0.172125
263	0.220146	0.165972	0.185194		263	0.234175	0.205562	0.170488
264	0.220601	0.166676	0.18671		264	0.233611	0.203926	0.169073
265	0.220029	0.167109	0.188848		265	0.233857	0.204831	0.169948
266	0.223456	0.167195	0.189164		266	0.232458	0.206272	0.167201
267	0.22186	0.169827	0.192094		267	0.231103	0.207201	0.165175
268	0.220739	0.17033	0.192919		268	0.232477	0.208519	0.164793
269	0.223798	0.172505	0.195579		269	0.232517	0.211301	0.164363
270	0.225046	0.175409	0.193108		270	0.233554	0.213172	0.165076
271	0.222716	0.17432	0.192206		271	0.23677	0.215622	0.166165
272	0.223629	0.172685	0.19449		272	0.237573	0.215428	0.166154
273	0.224815	0.171291	0.198544		273	0.239309	0.215181	0.166804
274	0.224316	0.168348	0.195863		274	0.242684	0.216704	0.167053
275	0.225196	0.16773	0.196818		275	0.241046	0.215696	0.166732
276	0.227886	0.169748	0.196334		276	0.240304	0.215213	0.167449
277	0.228045	0.16762	0.193314		277	0.239401	0.216539	0.167709
278	0.227964	0.167362	0.189629		278	0.238307	0.218224	0.167872
279	0.228371	0.169234	0.190115		279	0.236074	0.216767	0.167558
280	0.227532	0.166365	0.187899		280	0.238267	0.215926	0.166128
281	0.227376	0.165721	0.1858		281	0.238676	0.216819	0.166256
282	0.229421	0.169579	0.187047		282	0.241968	0.216557	0.167801
283	0.232991	0.170926	0.184608		283	0.242588	0.216276	0.168348
284	0.231655	0.169078	0.18406		284	0.242469	0.217191	0.168951
285	0.231695	0.171886	0.184596		285	0.242487	0.218306	0.167768
286	0.231999	0.170637	0.187787		286	0.24159	0.215817	0.167969
287	0.231701	0.168986	0.186143		287	0.237152	0.215934	0.165803
288	0.228467	0.168741	0.186952		288	0.235456	0.214251	0.165251
289	0.226237	0.168328	0.187725		289	0.231765	0.213559	0.16335
290	0.224627	0.166668	0.186132		290	0.231084	0.213723	0.163965
291	0.221596	0.167911	0.184888		291	0.232654	0.21488	0.161272
292	0.222066	0.16738	0.183494		292	0.235437	0.215039	0.160812
293	0.224676	0.166669	0.186038		293	0.235755	0.216988	0.160284
294	0.225502	0.168999	0.183411		294	0.2391	0.216025	0.161556
295	0.227464	0.168967	0.187071		295	0.238444	0.216044	0.161221
296	0.228164	0.167392	0.187393		296	0.237723	0.21661	0.162301
297	0.226917	0.167854	0.18762		297	0.238218	0.218185	0.162437
298	0.224669	0.167411	0.185112		298	0.236606	0.219627	0.161022
299	0.225141	0.165497	0.188719		299	0.239521	0.221912	0.160437
300	0.220986	0.16573	0.186731		300	0.242744	0.222126	0.160585
301	0.219713	0.168336	0.186414		301	0.244676	0.224723	0.159785
302	0.219862	0.170135	0.18707		302	0.246055	0.225439	0.16206
303	0.218524	0.171052	0.187027		303	0.249778	0.227076	0.163984
304	0.219122	0.170999	0.185193		304	0.248361	0.231075	0.161918
305	0.22169	0.168953	0.184756		305	0.247966	0.232132	0.161454
306	0.221505	0.166751	0.186167		306	0.249006	0.234138	0.161431
307	0.220734	0.166253	0.187917		307	0.251706	0.233969	0.160471
308	0.221234	0.166617	0.189191		308	0.255437	0.233317	0.158835
309	0.217956	0.165979	0.188684		309	0.25791	0.230324	0.161392
310	0.220046	0.166809	0.18951		310	0.258238	0.228569	0.162127
311	0.223685	0.16713	0.190459		311	0.2592	0.224895	0.16158
312	0.228429	0.164687	0.187798		312	0.256886	0.222544	0.161958
313	0.232001	0.164725	0.186869		313	0.25233	0.2217	0.165406
314	0.23594	0.165902	0.187675		314	0.247978	0.221242	0.16974
315	0.239084	0.166696	0.191362		315	0.246493	0.221538	0.173577
316	0.238505	0.166813	0.18786		316	0.245454	0.222112	0.178152
317	0.238218	0.16823	0.187858		317	0.245083	0.223268	0.181116
318	0.239636	0.168614	0.188902		318	0.246122	0.220674	0.181601
319	0.240598	0.170417	0.188337		319	0.249087	0.221906	0.177943
320	0.238374	0.16904	0.185492		320	0.248745	0.220776	0.177998
321	0.241831	0.169462	0.187984		321	0.245506	0.21918	0.178078
322	0.246307	0.169786	0.187131		322	0.245699	0.219112	0.176093
323	0.246469	0.170237	0.185466		323	0.244807	0.218182	0.176104
324	0.251003	0.169061	0.184958		324	0.243773	0.214138	0.177527
325	0.256153	0.171729	0.183431		325	0.240942	0.213957	0.17554
326	0.256921	0.171814	0.18134		326	0.240374	0.212647	0.174118
327	0.253646	0.171528	0.18456		327	0.238332	0.211298	0.174555
328	0.252914	0.170555	0.188389		328	0.235814	0.213839	0.173633
329	0.252582	0.169364	0.187362		329	0.231489	0.216338	0.173448
330	0.251619	0.167231	0.189199		330	0.230734	0.218877	0.175645
331	0.250069	0.16753	0.191866		331	0.228169	0.219767	0.175183
332	0.251848	0.166968	0.19293		332	0.225238	0.221425	0.17484
333	0.255809	0.168719	0.189244		333	0.223196	0.221068	0.174659
334	0.255936	0.169357	0.196591		334	0.221327	0.219799	0.174029
335	0.255167	0.169877	0.20083		335	0.219496	0.218778	0.171851
336	0.256432	0.170377	0.202549		336	0.217682	0.220656	0.173527
337	0.2585	0.173137	0.202389		337	0.214814	0.222717	0.172279
338	0.258722	0.173173	0.207394		338	0.214847	0.223762	0.173761
339	0.257073	0.175084	0.205901		339	0.215468	0.224437	0.173379
340	0.259316	0.178382	0.2025		340	0.213953	0.225545	0.173795
341	0.259781	0.179429	0.19953		341	0.214689	0.227918	0.172992
342	0.258547	0.180369	0.199905		342	0.214946	0.224569	0.174431
343	0.254645	0.182307	0.197767		343	0.214201	0.225447	0.174179
344	0.255437	0.184098	0.197434		344	0.214283	0.226542	0.17477
345	0.252386	0.183289	0.19629		345	0.21556	0.2255	0.176431
346	0.251297	0.183788	0.199353		346	0.213615	0.223717	0.17441
347	0.248202	0.184751	0.198833		347	0.214211	0.227534	0.175171
348	0.251314	0.18561	0.200915		348	0.213435	0.227342	0.175242
349	0.248989	0.186135	0.202552		349	0.21321	0.229029	0.174985
350	0.249665	0.188845	0.202208		350	0.213539	0.230049	0.171504
351	0.252683	0.190774	0.202254		351	0.218562	0.232586	0.17164
352	0.254353	0.19123	0.202659		352	0.219995	0.231373	0.169488
353	0.251565	0.190152	0.203062		353	0.222411	0.232855	0.167388
354	0.253559	0.18921	0.199736		354	0.222672	0.232853	0.166546
355	0.250581	0.188626	0.202699		355	0.224134	0.232978	0.16624
356	0.247979	0.187522	0.202474		356	0.21973	0.230573	0.165614
357	0.24676	0.187022	0.202788		357	0.217738	0.231621	0.165944
358	0.248499	0.188981	0.198191		358	0.216381	0.22857	0.165607
359	0.247767	0.188935	0.195128		359	0.215886	0.225159	0.165735
360	0.24978	0.187667	0.193105		360	0.213262	0.225276	0.166634
361	0.24778	0.187379	0.192191		361	0.212427	0.225671	0.167728
362	0.246439	0.186876	0.193112		362	0.210124	0.224656	0.16777
363	0.243589	0.18432	0.197389		363	0.20731	0.226393	0.168274
364	0.243787	0.185135	0.198219		364	0.207375	0.228141	0.168305
365	0.242552	0.187054	0.199682		365	0.206173	0.229384	0.168883
366	0.242119	0.189394	0.201166		366	0.208227	0.23004	0.171879
367	0.243276	0.191179	0.199137		367	0.211087	0.229527	0.171596
368	0.241927	0.191524	0.196601		368	0.211582	0.22883	0.170991
369	0.238936	0.192207	0.196479		369	0.211166	0.228941	0.170769
370	0.236435	0.19016	0.192597		370	0.212544	0.228545	0.171176
371	0.235967	0.185525	0.188437		371	0.21219	0.225961	0.166661
372	0.234483	0.184225	0.185217		372	0.212158	0.225033	0.166373
373	0.23217	0.183739	0.184326		373	0.212296	0.225058	0.166218
374	0.231994	0.181909	0.183804		374	0.211838	0.226503	0.165713
375	0.231154	0.181089	0.186365		375	0.212289	0.225832	0.163516
376	0.229229	0.18211	0.186073		376	0.213302	0.226231	0.164131
377	0.227372	0.181118	0.187464		377	0.213992	0.227959	0.164469
378	0.22641	0.180732	0.188909		378	0.215467	0.227644	0.165195
379	0.224197	0.178569	0.189676		379	0.214984	0.22675	0.165652
380	0.224442	0.179464	0.188305		380	0.214401	0.225692	0.166947
381	0.221416	0.178037	0.189999		381	0.215269	0.226249	0.166236
382	0.216873	0.177453	0.189948		382	0.216077	0.226061	0.16511
383	0.21722	0.177414	0.186446		383	0.217637	0.224655	0.16343
384	0.2152	0.175904	0.186839		384	0.221556	0.226071	0.164322
385	0.210524	0.172894	0.185345		385	0.22398	0.228064	0.166849
386	0.209796	0.171576	0.186541		386	0.224673	0.228601	0.168469
387	0.211241	0.16978	0.184473		387	0.225132	0.229165	0.169904
388	0.208273	0.166111	0.187193		388	0.226702	0.229614	0.172156
389	0.207339	0.167605	0.185602		389	0.227197	0.22782	0.171536
390	0.208468	0.167451	0.189297		390	0.225103	0.226197	0.169455
391	0.207437	0.168174	0.19019		391	0.225259	0.226074	0.169369
392	0.207088	0.168851	0.193049		392	0.224254	0.22284	0.169828
393	0.206008	0.17155	0.193569		393	0.223268	0.224996	0.17128
394	0.205448	0.170455	0.195102		394	0.22441	0.224423	0.170451
395	0.204621	0.170551	0.191305		395	0.227485	0.224504	0.167898
396	0.203585	0.170326	0.187683		396	0.227868	0.224978	0.166734
397	0.202341	0.169188	0.188637		397	0.230701	0.226065	0.16692
398	0.203146	0.168874	0.186701		398	0.231768	0.223607	0.165352
399	0.202216	0.168756	0.189044		399	0.2323	0.223891	0.165705
400	0.200239	0.169109	0.190086		400	0.235307	0.223291	0.168189
401	0.199969	0.17101	0.193254		401	0.235267	0.221827	0.171439
402	0.198563	0.169649	0.194076		402	0.234757	0.222777	0.17201
403	0.198095	0.169433	0.197641		403	0.234855	0.224702	0.172685
404	0.1972	0.169904	0.196837		404	0.231533	0.224192	0.174386
405	0.196872	0.171036	0.19751		405	0.22824	0.224945	0.175244
406	0.197788	0.169688	0.198801		406	0.227187	0.225588	0.174198
407	0.198374	0.171309	0.19797		407	0.224847	0.224538	0.174282
408	0.197781	0.170071	0.195866		408	0.222811	0.225416	0.175811
409	0.1988	0.170762	0.195747		409	0.221486	0.225067	0.176047
410	0.201564	0.168953	0.198316		410	0.222835	0.225393	0.176548
411	0.202154	0.167206	0.197253		411	0.22131	0.226389	0.17839
412	0.203349	0.166963	0.195787		412	0.222329	0.226581	0.178574
413	0.203341	0.16847	0.194763		413	0.221135	0.225306	0.177094
414	0.203301	0.168385	0.196077		414	0.224417	0.225215	0.17878
415	0.202131	0.169455	0.193589		415	0.222008	0.222595	0.180643
416	0.201388	0.170764	0.193306		416	0.224147	0.220239	0.180072
417	0.200167	0.170192	0.195639		417	0.225107	0.219471	0.182312
418	0.19976	0.168726	0.196456		418	0.226593	0.218892	0.182151
419	0.200128	0.168203	0.197116		419	0.227089	0.21878	0.181611
420	0.2023	0.168026	0.203659		420	0.229421	0.221868	0.181338
421	0.20109	0.169294	0.201875		421	0.230047	0.222925	0.179982
422	0.200593	0.169473	0.199268		422	0.230553	0.225589	0.176788
423	0.199416	0.171164	0.200943		423	0.232133	0.226515	0.178384
424	0.199097	0.169883	0.199384		424	0.233548	0.227685	0.177814
425	0.196917	0.17071	0.196057		425	0.233241	0.225483	0.17619
426	0.198184	0.168608	0.196028		426	0.235368	0.225189	0.177408
427	0.197892	0.170414	0.19886		427	0.235251	0.224079	0.179165
428	0.198656	0.168429	0.196305		428	0.235403	0.221824	0.178325
429	0.197651	0.16925	0.197118		429	0.233178	0.221288	0.17725
430	0.197764	0.169483	0.196158		430	0.233615	0.22108	0.176605
431	0.198578	0.170775	0.197479		431	0.235175	0.220026	0.178688
432	0.200695	0.168242	0.197083		432	0.236373	0.220382	0.17814
433	0.201932	0.167619	0.201965		433	0.237139	0.219597	0.178191
434	0.202674	0.168527	0.199401		434	0.238242	0.21939	0.179646
435	0.202677	0.167598	0.197297		435	0.239641	0.221157	0.181163
436	0.202526	0.167013	0.195855		436	0.236956	0.222608	0.178633
437	0.203121	0.16927	0.195544		437	0.240225	0.220118	0.180729
438	0.203703	0.171847	0.192134		438	0.243553	0.220948	0.180663
439	0.206196	0.171794	0.190765		439	0.247086	0.221053	0.17889
440	0.206396	0.171848	0.191177		440	0.251724	0.219856	0.176518
441	0.205163	0.172697	0.192041		441	0.257616	0.22003	0.174618
442	0.203665	0.169849	0.193198		442	0.261336	0.221137	0.173139
443	0.203612	0.169556	0.198813		443	0.263847	0.220095	0.174035
444	0.201551	0.169451	0.199876		444	0.268463	0.220005	0.174999
445	0.203719	0.168468	0.201154		445	0.27271	0.221879	0.176482
446	0.204651	0.16793	0.20019		446	0.277138	0.220111	0.177645
447	0.207224	0.169717	0.197441		447	0.279968	0.219521	0.176516
448	0.205958	0.169351	0.194323		448	0.283764	0.222375	0.173828
449	0.210145	0.16935	0.191858		449	0.286829	0.223155	0.172975
450	0.208849	0.168784	0.191951		450	0.288321	0.222861	0.173418
451	0.208665	0.167356	0.191406		451	0.288141	0.224305	0.175352
452	0.208561	0.167018	0.190792		452	0.287634	0.224902	0.1745
453	0.210041	0.166699	0.188881		453	0.291132	0.223681	0.175253
454	0.206928	0.166318	0.192132		454	0.290672	0.222262	0.175702
455	0.206308	0.167993	0.192733		455	0.29086	0.221846	0.175168
456	0.211316	0.168985	0.194108		456	0.29079	0.220824	0.17642
457	0.209918	0.169334	0.196037		457	0.293372	0.220531	0.173306
458	0.213419	0.170391	0.19482		458	0.293573	0.222103	0.174136
459	0.214306	0.170357	0.197674		459	0.294461	0.222374	0.1759
460	0.217435	0.170375	0.197602		460	0.293824	0.221298	0.176718
461	0.212706	0.16951	0.199869		461	0.292755	0.221799	0.175742
462	0.21429	0.167363	0.19774		462	0.290065	0.224233	0.17919
463	0.213494	0.168851	0.198398		463	0.288638	0.224681	0.178401
464	0.212627	0.16893	0.196382		464	0.285921	0.226132	0.177694
465	0.210731	0.169576	0.195518		465	0.285374	0.225254	0.177917
466	0.21186	0.172097	0.192337		466	0.285048	0.224991	0.176646
467	0.210471	0.174524	0.194032		467	0.282409	0.223839	0.177539
468	0.207974	0.172004	0.192184		468	0.278642	0.221735	0.178329
469	0.209077	0.169979	0.188024		469	0.275755	0.220029	0.17733
470	0.210587	0.169518	0.186772		470	0.271765	0.223122	0.17473
471	0.210402	0.167449	0.184704		471	0.27032	0.224617	0.175993
472	0.211853	0.167732	0.183828		472	0.268073	0.227374	0.174757
473	0.213147	0.169081	0.184097		473	0.266943	0.228303	0.175721
474	0.212485	0.170529	0.186149		474	0.2651	0.229296	0.176671
475	0.210318	0.169412	0.188446		475	0.262576	0.227082	0.177216
476	0.209674	0.169225	0.189969		476	0.261263	0.226653	0.175217
477	0.206652	0.168364	0.191851		477	0.259639	0.224095	0.17586
478	0.204099	0.165126	0.191242		478	0.254614	0.222633	0.173863
479	0.201002	0.164575	0.191267		479	0.252727	0.22101	0.17496
480	0.198793	0.16426	0.187377		480	0.250223	0.222785	0.175289
481	0.196233	0.165604	0.188867		481	0.246399	0.222477	0.175952
482	0.195554	0.165512	0.184307		482	0.243375	0.220105	0.17873
483	0.19318	0.167115	0.184633		483	0.239242	0.219662	0.180981
484	0.192609	0.168495	0.185508		484	0.236393	0.221554	0.18092
485	0.190223	0.167845	0.188697		485	0.232768	0.21916	0.18389
486	0.188205	0.166523	0.188711		486	0.230125	0.217446	0.185901
487	0.187075	0.166766	0.189585		487	0.227732	0.217541	0.184781
488	0.187666	0.166318	0.190475		488	0.225637	0.21847	0.184713
489	0.187553	0.164342	0.191883		489	0.221793	0.218507	0.183775
490	0.189546	0.163868	0.190233		490	0.223086	0.222464	0.181739
491	0.191611	0.164949	0.19251		491	0.222493	0.225655	0.179112
492	0.189964	0.161866	0.192988		492	0.223083	0.227212	0.17956
493	0.188698	0.162507	0.192886		493	0.22508	0.230717	0.179051
494	0.187652	0.165244	0.193984		494	0.225935	0.232461	0.179499
495	0.186009	0.168957	0.195637		495	0.224599	0.228743	0.18081
496	0.184012	0.168008	0.190552		496	0.223685	0.231241	0.182288
497	0.186178	0.171389	0.191107		497	0.22357	0.234139	0.180901
498	0.18631	0.170305	0.193444		498	0.221694	0.231333	0.181888
499	0.187714	0.168272	0.192729		499	0.223193	0.231374	0.18338
500	0.18994	0.16686	0.193506		500	0.221606	0.23415	0.183955
501	0.190415	0.168053	0.196028		501	0.220671	0.232808	0.185017
502	0.18864	0.168854	0.197181		502	0.220735	0.231566	0.187807
503	0.188826	0.170618	0.194766		503	0.221529	0.232076	0.188764
504	0.188564	0.171246	0.194954		504	0.220736	0.230563	0.189557
505	0.188846	0.169298	0.19385		505	0.221557	0.229824	0.190148
506	0.187748	0.169614	0.195299		506	0.222942	0.227373	0.189984
507	0.18805	0.167286	0.194599		507	0.224703	0.226895	0.187529
508	0.189423	0.167579	0.194794		508	0.229409	0.227964	0.186533
509	0.1896	0.166689	0.191648		509	0.231177	0.22493	0.186706
510	0.186744	0.167866	0.189224		510	0.233385	0.223669	0.186323
511	0.188164	0.165689	0.187159		511	0.234799	0.221835	0.187003
512	0.187316	0.165393	0.189309		512	0.236729	0.219855	0.193071
513	0.187081	0.164451	0.191664		513	0.235574	0.217926	0.196465
514	0.186739	0.166153	0.195058		514	0.237511	0.220085	0.195376
515	0.186701	0.167353	0.197623		515	0.238815	0.219974	0.19752
516	0.184975	0.167947	0.200394		516	0.240401	0.219715	0.197215
517	0.18401	0.169429	0.200244		517	0.240457	0.219903	0.194538
518	0.181235	0.169078	0.201125		518	0.243518	0.221326	0.194568
519	0.178803	0.169423	0.202649		519	0.245509	0.219297	0.197594
520	0.178633	0.169542	0.201039		520	0.245939	0.218122	0.196971
521	0.179097	0.170916	0.198773		521	0.246403	0.218352	0.20108
522	0.181303	0.17123	0.198822		522	0.246898	0.217868	0.202296
523	0.182547	0.173626	0.195408		523	0.247846	0.213861	0.202026
524	0.184352	0.171823	0.193962		524	0.246687	0.213335	0.201427
525	0.184498	0.169758	0.194499		525	0.250597	0.213954	0.203548
526	0.18478	0.168498	0.193918		526	0.253166	0.211234	0.201174
527	0.184624	0.167952	0.190887		527	0.253425	0.211951	0.200377
528	0.187145	0.166129	0.190604		528	0.252625	0.211158	0.201664
529	0.187071	0.165804	0.189828		529	0.254539	0.210738	0.201596
530	0.191616	0.169048	0.189602		530	0.253309	0.207993	0.200684
531	0.194422	0.169433	0.190736		531	0.254816	0.212339	0.201356
532	0.19794	0.170609	0.191196		532	0.255312	0.2101	0.201281
533	0.196847	0.17065	0.193118		533	0.257032	0.212628	0.199
534	0.199973	0.172026	0.189765		534	0.259338	0.214691	0.200152
535	0.200247	0.170342	0.192036		535	0.258564	0.215341	0.199211
536	0.201161	0.171445	0.189288		536	0.257035	0.213649	0.199698
537	0.200446	0.170703	0.190232		537	0.257251	0.213318	0.199557
538	0.202595	0.170945	0.189152		538	0.255457	0.211668	0.198373
539	0.203085	0.172928	0.194792		539	0.253467	0.210362	0.193504
540	0.203351	0.173523	0.19444		540	0.255781	0.210653	0.1923
541	0.203474	0.172312	0.198868		541	0.257473	0.210628	0.189569
542	0.206982	0.173846	0.196591		542	0.257742	0.213438	0.188482
543	0.206991	0.173401	0.197017		543	0.257845	0.213961	0.188909
544	0.206011	0.172495	0.195025		544	0.256351	0.21376	0.190466
545	0.203689	0.172006	0.1919		545	0.253494	0.214427	0.1897
546	0.204013	0.171371	0.186303		546	0.249828	0.215627	0.188606
547	0.20146	0.169497	0.19076		547	0.249022	0.214136	0.18709
548	0.20107	0.169291	0.189308		548	0.246861	0.212108	0.185544
549	0.20246	0.167061	0.185333		549	0.245221	0.211299	0.186297
550	0.205135	0.166454	0.183199		550	0.246016	0.210839	0.186923
551	0.207336	0.16928	0.185729		551	0.246115	0.210336	0.186805
552	0.207316	0.170551	0.182107		552	0.244983	0.209497	0.186666
553	0.209816	0.16871	0.181414		553	0.24502	0.211345	0.184937
554	0.209917	0.170875	0.18195		554	0.244921	0.214559	0.183133
555	0.210659	0.171188	0.185143		555	0.245052	0.217195	0.183843
556	0.209955	0.1704	0.18618		556	0.245565	0.21711	0.184033
557	0.213623	0.168611	0.18599		557	0.246504	0.216704	0.184715
558	0.212513	0.170911	0.185867		558	0.246914	0.217171	0.186586
559	0.214113	0.169571	0.186103		559	0.24819	0.216455	0.185873
560	0.215653	0.170045	0.183118		560	0.246555	0.216082	0.184625
561	0.215602	0.168804	0.179121		561	0.246073	0.216311	0.183613
562	0.213537	0.169847	0.177713		562	0.243754	0.217594	0.183153
563	0.21578	0.169484	0.181501		563	0.243524	0.217046	0.181591
564	0.214194	0.169295	0.185233		564	0.243418	0.217317	0.182363
565	0.21549	0.16921	0.185959		565	0.243868	0.215789	0.181242
566	0.217194	0.169087	0.189182		566	0.244246	0.216175	0.181861
567	0.217681	0.167206	0.189869		567	0.246013	0.21604	0.181096
568	0.219694	0.168742	0.186788		568	0.248313	0.216164	0.184275
569	0.221504	0.169472	0.182255		569	0.249758	0.215481	0.184103
570	0.22183	0.173058	0.184044		570	0.2508	0.216122	0.184078
571	0.222067	0.174776	0.182505		571	0.251292	0.216588	0.185786
572	0.219532	0.173823	0.183194		572	0.251971	0.218005	0.187292
573	0.217806	0.171397	0.183598		573	0.251065	0.220655	0.188364
574	0.215021	0.170168	0.185598		574	0.254161	0.222463	0.189816
575	0.211217	0.165437	0.185044		575	0.254882	0.223211	0.190319
576	0.211145	0.164618	0.188021		576	0.255505	0.22256	0.190735
577	0.211108	0.16601	0.187665		577	0.256994	0.223994	0.192545
578	0.211004	0.167274	0.190009		578	0.257106	0.224757	0.189564
579	0.214229	0.168753	0.190365		579	0.256021	0.226264	0.18923
580	0.213902	0.166306	0.189445		580	0.255025	0.22855	0.192367
581	0.212568	0.165921	0.18997		581	0.256388	0.23023	0.191322
582	0.214519	0.166716	0.193507		582	0.252316	0.230687	0.190654
583	0.216293	0.165567	0.192279		583	0.251374	0.229819	0.192803
584	0.219542	0.165031	0.192402		584	0.247837	0.227932	0.192824
585	0.225	0.170021	0.192866		585	0.245948	0.225189	0.192244
586	0.230146	0.170815	0.190606		586	0.242594	0.226192	0.196261
587	0.233597	0.173335	0.18984		587	0.244649	0.226322	0.197804
588	0.231431	0.173527	0.189034		588	0.244065	0.226292	0.19895
589	0.22949	0.172446	0.189694		589	0.242376	0.226568	0.201239
590	0.229967	0.173219	0.188855		590	0.242122	0.228074	0.202906
591	0.229605	0.175161	0.188502		591	0.24101	0.227012	0.203032
592	0.230245	0.174864	0.186957		592	0.236811	0.228611	0.204582
593	0.233807	0.179402	0.188355		593	0.234313	0.231119	0.206359
594	0.235894	0.181963	0.190711		594	0.232726	0.232812	0.209042
595	0.236436	0.182053	0.192088		595	0.231822	0.23653	0.211349
596	0.237305	0.181871	0.189976		596	0.231376	0.237152	0.212961
597	0.240304	0.181014	0.191544		597	0.232364	0.234641	0.214536
598	0.242231	0.178755	0.188282		598	0.231401	0.233671	0.216388
599	0.247108	0.181288	0.187169		599	0.229238	0.233952	0.216369
600	0.249368	0.180302	0.186425		600	0.226796	0.229635	0.215819
601	0.253499	0.178321	0.187553		601	0.223529	0.230242	0.215328
602	0.255471	0.179789	0.189005		602	0.223594	0.230255	0.21351
603	0.260032	0.181784	0.190311		603	0.224019	0.231489	0.21329
604	0.262345	0.182063	0.186942		604	0.227392	0.2334	0.211771
605	0.2658	0.185401	0.187583		605	0.227828	0.236685	0.211193
606	0.26627	0.187697	0.192683		606	0.226061	0.237951	0.209002
607	0.270216	0.189326	0.191001		607	0.226135	0.24107	0.21008
608	0.272896	0.186604	0.194856		608	0.226102	0.242402	0.207939
609	0.274666	0.184506	0.199969		609	0.223504	0.242952	0.206871
610	0.278995	0.180111	0.203361		610	0.222971	0.245861	0.205389
611	0.284634	0.178972	0.204206		611	0.225846	0.248105	0.207259
612	0.2891	0.176191	0.205222		612	0.226306	0.253078	0.204927
613	0.294249	0.178466	0.208359		613	0.226634	0.253746	0.202677
614	0.30068	0.177257	0.207952		614	0.22846	0.254175	0.202123
615	0.3055	0.177243	0.210927		615	0.229443	0.254956	0.199746
616	0.311749	0.176049	0.212557		616	0.23058	0.257614	0.196699
617	0.319225	0.176535	0.215583		617	0.22945	0.255376	0.197129
618	0.324491	0.176051	0.212928		618	0.229981	0.258581	0.198411
619	0.33051	0.177213	0.212655		619	0.230604	0.259206	0.199671
620	0.333852	0.177892	0.214203		620	0.2303	0.260187	0.201034
621	0.339187	0.182267	0.21309		621	0.229333	0.261651	0.202017
622	0.340081	0.183557	0.214002		622	0.230891	0.262667	0.201885
623	0.343295	0.184015	0.216132		623	0.231602	0.264994	0.202696
624	0.343176	0.187219	0.218373		624	0.231826	0.269031	0.202758
625	0.339844	0.189475	0.214685		625	0.233964	0.268456	0.203191
626	0.339481	0.189164	0.214671		626	0.234486	0.268682	0.204754
627	0.339166	0.189766	0.211615		627	0.236196	0.270936	0.204242
628	0.339315	0.195477	0.21021		628	0.238619	0.269445	0.202477
629	0.338262	0.193173	0.209301		629	0.241843	0.268707	0.201823
630	0.341199	0.194303	0.209509		630	0.241542	0.269557	0.20259
631	0.335594	0.192387	0.210912		631	0.245434	0.269889	0.199684
632	0.330219	0.192004	0.212511		632	0.245151	0.267446	0.197572
633	0.326832	0.186705	0.211982		633	0.245945	0.2674	0.196462
634	0.324761	0.187443	0.210175		634	0.24735	0.265946	0.195673
635	0.320981	0.186882	0.213262		635	0.249807	0.265803	0.194944
636	0.321534	0.187106	0.212751		636	0.248553	0.261094	0.195107
637	0.318248	0.187671	0.213776		637	0.250176	0.262274	0.196286
638	0.312415	0.190843	0.213937		638	0.2506	0.26207	0.197323
639	0.308023	0.191121	0.215877		639	0.2524	0.263376	0.199567
640	0.305844	0.192705	0.21321		640	0.254773	0.262199	0.201788
641	0.300981	0.193712	0.209706		641	0.25767	0.264453	0.204783
642	0.300556	0.195509	0.208925		642	0.260337	0.263968	0.206092
643	0.299591	0.193497	0.209297		643	0.262725	0.26305	0.209701
644	0.297577	0.194168	0.208456		644	0.261434	0.260659	0.209523
645	0.294262	0.192358	0.208959		645	0.2635	0.260979	0.210304
646	0.291382	0.192485	0.208568		646	0.266731	0.260062	0.209316
647	0.289169	0.191575	0.208487		647	0.269986	0.25821	0.213879
648	0.284632	0.192034	0.208825		648	0.273534	0.258578	0.214202
649	0.281183	0.191428	0.209697		649	0.277989	0.259227	0.217552
650	0.279919	0.191793	0.208362		650	0.279847	0.25809	0.219077
651	0.277777	0.190759	0.210366		651	0.28169	0.259436	0.224141
652	0.273522	0.190089	0.210236		652	0.285376	0.259915	0.222717
653	0.271896	0.187975	0.209128		653	0.288585	0.257173	0.224408
654	0.267589	0.187362	0.208245		654	0.293625	0.258451	0.22609
655	0.263171	0.187031	0.210029		655	0.303477	0.259285	0.227845
656	0.260552	0.187558	0.214493		656	0.311351	0.257553	0.227948
657	0.260911	0.18879	0.214161		657	0.316509	0.258354	0.231476
658	0.260695	0.188563	0.214655		658	0.321348	0.260493	0.235507
659	0.264416	0.190005	0.21509		659	0.325755	0.261551	0.234831
660	0.266373	0.188846	0.213606		660	0.326173	0.26087	0.235674
661	0.267587	0.187194	0.210683		661	0.325807	0.263015	0.235323
662	0.266249	0.186575	0.210451		662	0.324573	0.264584	0.235134
663	0.265772	0.187358	0.211044		663	0.325103	0.266857	0.234342
664	0.263405	0.184647	0.210395		664	0.320362	0.265146	0.232905
665	0.263	0.183332	0.209114		665	0.317454	0.266924	0.232353
666	0.26426	0.185887	0.209159		666	0.312822	0.265114	0.231466
667	0.264135	0.18371	0.211789		667	0.310813	0.265626	0.231412
668	0.263315	0.182518	0.209282		668	0.303791	0.263006	0.234259
669	0.264938	0.183777	0.207884		669	0.300475	0.262567	0.237491
670	0.264941	0.184517	0.209007		670	0.293135	0.262579	0.240043
671	0.263194	0.184002	0.205148		671	0.290198	0.262085	0.242733
672	0.265542	0.184989	0.200955		672	0.281426	0.259072	0.242321
673	0.267826	0.186093	0.202078		673	0.275578	0.258666	0.241985
674	0.26688	0.187298	0.204796		674	0.269488	0.260169	0.243083
675	0.266883	0.188524	0.204493		675	0.264087	0.259284	0.243103
676	0.265398	0.190065	0.20566		676	0.255588	0.259482	0.244949
677	0.265482	0.189965	0.20989		677	0.252405	0.260335	0.247109
678	0.264023	0.190539	0.211107		678	0.248619	0.261099	0.247901
679	0.262671	0.189989	0.21109		679	0.243161	0.258741	0.248401
680	0.264142	0.191146	0.210343		680	0.239442	0.258476	0.247245
681	0.264601	0.190972	0.211237		681	0.236905	0.256187	0.247231
682	0.263457	0.191627	0.207481		682	0.234047	0.256745	0.247333
683	0.265726	0.191999	0.205142		683	0.233232	0.254564	0.242694
684	0.268043	0.19155	0.206315		684	0.231951	0.252937	0.239708
685	0.268235	0.192616	0.208017		685	0.229555	0.254436	0.238306
686	0.267258	0.191167	0.211329		686	0.228325	0.256481	0.236695
687	0.266784	0.191712	0.215134		687	0.227981	0.254099	0.233694
688	0.264462	0.194397	0.21837		688	0.226855	0.256901	0.233935
689	0.262104	0.194571	0.217831		689	0.225771	0.257703	0.234388
690	0.259896	0.193207	0.217555		690	0.226895	0.255803	0.232465
691	0.263439	0.193892	0.215691		691	0.226426	0.255398	0.232349
692	0.264545	0.19351	0.215049		692	0.225897	0.256564	0.231918
693	0.263616	0.186704	0.212467		693	0.222667	0.253543	0.231509
694	0.263549	0.18567	0.20978		694	0.223532	0.252865	0.230286
695	0.263263	0.18507	0.214686		695	0.221561	0.253222	0.228106
696	0.262444	0.18445	0.216952		696	0.222244	0.253723	0.224999
697	0.260719	0.184334	0.21512		697	0.219925	0.252264	0.22243
698	0.260397	0.185895	0.217094		698	0.221625	0.251965	0.219988
699	0.260372	0.186204	0.217255		699	0.220903	0.25302	0.21796
700	0.259692	0.183473	0.214194		700	0.219716	0.253055	0.218778
701	0.256051	0.180508	0.209843		701	0.217663	0.252171	0.218623
702	0.258814	0.178482	0.211325		702	0.218059	0.25458	0.21882
703	0.259468	0.17934	0.209944		703	0.216552	0.255959	0.219544
704	0.263738	0.177018	0.210946		704	0.21535	0.256615	0.220097
705	0.264466	0.176993	0.206055		705	0.216555	0.257957	0.219752
706	0.266234	0.178122	0.207403		706	0.218669	0.258659	0.219519
707	0.262786	0.177959	0.205091		707	0.218109	0.255766	0.222553
708	0.259647	0.176603	0.206273		708	0.218019	0.256866	0.221269
709	0.252149	0.178488	0.206404		709	0.216451	0.256138	0.222162
710	0.253654	0.178311	0.210744		710	0.215727	0.254206	0.222271
711	0.25036	0.176711	0.209169		711	0.213294	0.254953	0.222081
712	0.252171	0.174498	0.213422		712	0.212389	0.254945	0.221528
713	0.253531	0.174761	0.21228		713	0.212961	0.255397	0.222222
714	0.254411	0.172127	0.212791		714	0.214618	0.253946	0.221694
715	0.25014	0.174166	0.215071		715	0.214925	0.252858	0.224794
716	0.252532	0.174366	0.220563		716	0.215055	0.252364	0.2253
717	0.250431	0.175952	0.220243		717	0.215939	0.25527	0.225234
718	0.25004	0.175332	0.224711		718	0.215808	0.25429	0.223521
719	0.250935	0.177774	0.224852		719	0.217323	0.255632	0.226246
720	0.25421	0.176404	0.221098		720	0.217821	0.255682	0.226132
721	0.25232	0.176982	0.218896		721	0.21722	0.255036	0.225749
722	0.253188	0.177002	0.220738		722	0.218988	0.252662	0.225342
723	0.254449	0.176645	0.219951		723	0.219708	0.252156	0.229737
724	0.256865	0.175305	0.224956		724	0.219145	0.255445	0.229708
725	0.256075	0.174455	0.228212		725	0.220102	0.257115	0.231347
726	0.257988	0.173883	0.229784		726	0.223805	0.259135	0.2325
727	0.257947	0.171879	0.231369		727	0.224671	0.262559	0.233781
728	0.258749	0.172996	0.233175		728	0.223533	0.266455	0.233885
729	0.257504	0.173022	0.232367		729	0.22455	0.268297	0.23305
730	0.258111	0.174026	0.237255		730	0.224882	0.268587	0.231744
731	0.25965	0.171978	0.241824		731	0.223634	0.271941	0.235527
732	0.260352	0.173409	0.244234		732	0.223669	0.27177	0.236296
733	0.261785	0.171289	0.247864		733	0.227929	0.26898	0.235437
734	0.267123	0.169702	0.253939		734	0.229761	0.264305	0.234985
735	0.267234	0.16979	0.260023		735	0.233466	0.266013	0.237707
736	0.268341	0.172412	0.263017		736	0.238188	0.262088	0.235998
737	0.267562	0.170706	0.267716		737	0.239365	0.263326	0.23809
738	0.266621	0.171836	0.269167		738	0.239795	0.264669	0.244764
739	0.266075	0.174023	0.270077		739	0.242722	0.266208	0.249761
740	0.270469	0.171756	0.270495		740	0.242508	0.265363	0.256747
741	0.271832	0.171328	0.277395		741	0.242853	0.264267	0.262475
742	0.280137	0.171942	0.278329		742	0.246018	0.262903	0.268399
743	0.286622	0.171671	0.284982		743	0.249532	0.262482	0.274934
744	0.292533	0.168622	0.288434		744	0.252086	0.263227	0.282029
745	0.296818	0.168713	0.293142		745	0.256718	0.260123	0.285397
746	0.307217	0.168844	0.297005		746	0.260512	0.262261	0.291153
747	0.312751	0.169938	0.299407		747	0.265517	0.261655	0.294647
748	0.319911	0.16866	0.305645		748	0.269207	0.259635	0.294084
749	0.325635	0.169112	0.314281		749	0.273144	0.257911	0.295761
750	0.332594	0.169163	0.316535		750	0.277947	0.257601	0.29618
751	0.337129	0.167365	0.316073		751	0.288099	0.256319	0.29731
752	0.341995	0.167373	0.317533		752	0.296638	0.256463	0.296267
753	0.346222	0.16816	0.315712		753	0.30812	0.255187	0.294023
754	0.348428	0.168375	0.314791		754	0.319078	0.251288	0.292033
755	0.347819	0.168703	0.316902		755	0.328727	0.252016	0.282645
756	0.348686	0.169335	0.315563		756	0.334216	0.249336	0.272452
757	0.349436	0.169144	0.324031		757	0.33691	0.246339	0.267986
758	0.347342	0.1703	0.322106		758	0.341044	0.244954	0.262054
759	0.344424	0.171903	0.320054		759	0.344662	0.244003	0.253484
760	0.343118	0.17306	0.318975		760	0.342618	0.242301	0.251659
761	0.339125	0.174213	0.31551		761	0.340036	0.241452	0.250798
762	0.335427	0.174704	0.308852		762	0.337026	0.241027	0.244862
763	0.332776	0.17756	0.308906		763	0.330111	0.241664	0.240109
764	0.330374	0.178182	0.312753		764	0.319699	0.243468	0.234944
765	0.328027	0.180848	0.310778		765	0.312319	0.244875	0.229078
766	0.321098	0.181927	0.315358		766	0.302129	0.245215	0.222334
767	0.311988	0.183622	0.31109		767	0.293703	0.244067	0.217354
768	0.305026	0.182889	0.30768		768	0.281959	0.243072	0.212158
769	0.296151	0.183078	0.303818		769	0.271233	0.242257	0.209483
770	0.287616	0.183499	0.295388		770	0.261418	0.242624	0.206648
771	0.282525	0.18454	0.288646		771	0.254176	0.244655	0.202384
772	0.278119	0.185666	0.289212		772	0.246299	0.246644	0.199784
773	0.273529	0.184171	0.287732		773	0.238988	0.248914	0.195897
774	0.270511	0.185267	0.280109		774	0.233858	0.252734	0.19416
775	0.268732	0.182683	0.276125		775	0.231422	0.252547	0.191516
776	0.264827	0.18128	0.278525		776	0.227172	0.253386	0.190463
777	0.262188	0.181693	0.277096		777	0.226176	0.254023	0.187692
778	0.25696	0.181528	0.271496		778	0.225231	0.255601	0.189174
779	0.25502	0.179872	0.265853		779	0.225029	0.255486	0.185233
780	0.255323	0.180379	0.266559		780	0.22221	0.2545	0.185052
781	0.251947	0.179626	0.255204		781	0.220882	0.255103	0.184124
782	0.248552	0.174944	0.247702		782	0.217644	0.257976	0.181879
783	0.246685	0.174111	0.247984		783	0.215831	0.258894	0.180613
784	0.24505	0.174184	0.250653		784	0.215641	0.258001	0.181526
785	0.241088	0.173775	0.250155		785	0.215019	0.261288	0.180416
786	0.241564	0.172054	0.251499		786	0.215982	0.261868	0.181188
787	0.24414	0.173851	0.248678		787	0.21519	0.260154	0.181209
788	0.244493	0.17221	0.246244		788	0.214754	0.259075	0.179843
789	0.244105	0.171536	0.241564		789	0.212191	0.26171	0.179945
790	0.242283	0.168753	0.235176		790	0.21297	0.261655	0.178267
791	0.240377	0.169165	0.231929		791	0.212247	0.262451	0.176229
792	0.239558	0.16783	0.229584		792	0.211867	0.263508	0.174927
793	0.240673	0.169324	0.230077		793	0.213113	0.264309	0.173905
794	0.240094	0.168105	0.229629		794	0.213918	0.263968	0.170618
795	0.23901	0.168185	0.234753		795	0.212511	0.266362	0.171937
796	0.241743	0.167916	0.232232		796	0.209926	0.266236	0.171516
797	0.242599	0.167738	0.233967		797	0.209586	0.27024	0.173963
798	0.239524	0.166536	0.231123		798	0.209439	0.27355	0.175159
799	0.23851	0.167093	0.230333		799	0.206904	0.27825	0.177692
800	0.238726	0.16761	0.227756		800	0.206825	0.278912	0.177797
801	0.235574	0.167762	0.227196		801	0.208206	0.283969	0.179875
802	0.230015	0.168607	0.227203		802	0.20744	0.283399	0.180914
803	0.232058	0.16879	0.225938		803	0.203242	0.285437	0.180036
804	0.228894	0.170644	0.223849		804	0.203865	0.284819	0.180979
805	0.228147	0.170768	0.219677		805	0.203563	0.287527	0.183337
806	0.23005	0.171909	0.218291		806	0.201502	0.284554	0.183771
807	0.231766	0.170396	0.21507		807	0.199633	0.287358	0.183019
808	0.230264	0.171872	0.212783		808	0.202172	0.284858	0.185786
809	0.232013	0.168149	0.210957		809	0.202963	0.284024	0.185428
810	0.230804	0.16793	0.209655		810	0.201807	0.282884	0.185099
811	0.227004	0.168349	0.210149		811	0.20252	0.282834	0.185787
812	0.225966	0.169243	0.211764		812	0.205185	0.280342	0.18705
813	0.225723	0.168076	0.212735		813	0.204076	0.283435	0.185119
814	0.223344	0.16871	0.209779		814	0.203657	0.283891	0.187628
815	0.222739	0.16938	0.210438		815	0.204971	0.285609	0.185354
816	0.225677	0.167818	0.208975		816	0.204416	0.289223	0.1847
817	0.225041	0.16863	0.204832		817	0.202386	0.288368	0.186173
818	0.223695	0.169434	0.20124		818	0.201821	0.287921	0.188559
819	0.226259	0.171383	0.202886		819	0.201372	0.289429	0.18813
820	0.225959	0.170538	0.201364		820	0.199437	0.289117	0.192947
821	0.223782	0.169659	0.202408		821	0.198786	0.287246	0.194293
822	0.225412	0.168914	0.203053		822	0.199104	0.291936	0.193792
823	0.226114	0.168129	0.204321		823	0.199888	0.293393	0.193724
824	0.225862	0.166225	0.206378		824	0.200006	0.294605	0.193746
825	0.226019	0.16641	0.207677		825	0.200179	0.293519	0.191873
826	0.226934	0.167338	0.204445		826	0.202116	0.295134	0.192274
827	0.223723	0.167438	0.206153		827	0.202415	0.292832	0.193321
828	0.224676	0.168488	0.203224		828	0.200828	0.292764	0.192634
829	0.224654	0.169706	0.203074		829	0.20115	0.290129	0.193114
830	0.226311	0.169257	0.204113		830	0.203272	0.290894	0.19532
831	0.223749	0.169676	0.208073		831	0.20369	0.290083	0.195346
832	0.226976	0.169648	0.208202		832	0.203645	0.29121	0.196597
833	0.226761	0.170311	0.209881		833	0.206446	0.289626	0.199312
834	0.226754	0.170959	0.204876		834	0.207917	0.287604	0.197684
835	0.22417	0.171163	0.203429		835	0.207838	0.283228	0.195027
836	0.22541	0.169848	0.201035		836	0.207466	0.283698	0.196017
837	0.22282	0.169896	0.200296		837	0.209986	0.279812	0.195489
838	0.22202	0.16823	0.199352		838	0.210841	0.280611	0.195789
839	0.222125	0.167293	0.202926		839	0.20989	0.280421	0.199102
840	0.223224	0.166682	0.203549		840	0.210964	0.283606	0.20148
841	0.223115	0.16707	0.20625		841	0.213573	0.280826	0.203809
842	0.224528	0.165846	0.203647		842	0.215813	0.281489	0.206331
843	0.222884	0.165313	0.206642		843	0.218107	0.278602	0.20949
844	0.22156	0.164802	0.20576		844	0.22033	0.279766	0.214051
845	0.222593	0.166224	0.205859		845	0.22246	0.27748	0.2154
846	0.224732	0.165912	0.20408		846	0.223917	0.277077	0.216046
847	0.226427	0.166762	0.205016		847	0.226058	0.277057	0.217849
848	0.228092	0.167882	0.205058		848	0.229153	0.27707	0.221483
849	0.228717	0.169949	0.199513		849	0.235467	0.27644	0.223303
850	0.229536	0.170138	0.197513		850	0.239713	0.276989	0.228936
851	0.225905	0.170646	0.196036		851	0.243684	0.274416	0.235011
852	0.224082	0.169777	0.196204		852	0.248973	0.273904	0.238065
853	0.221146	0.170193	0.195614		853	0.255267	0.271766	0.241478
854	0.223256	0.16917	0.200208		854	0.259767	0.271325	0.244299
855	0.219735	0.169418	0.198292		855	0.262899	0.269098	0.245804
856	0.221312	0.169808	0.199862		856	0.270512	0.270066	0.250788
857	0.223337	0.170575	0.197864		857	0.277226	0.269178	0.256504
858	0.224049	0.169189	0.198234		858	0.28693	0.268837	0.260269
859	0.221674	0.169022	0.199246		859	0.29313	0.26686	0.269698
860	0.223777	0.167115	0.205499		860	0.308623	0.267878	0.281131
861	0.226514	0.168034	0.204498		861	0.317661	0.264677	0.288865
862	0.226377	0.167586	0.207099		862	0.32637	0.262275	0.298409
863	0.228734	0.16676	0.2084		863	0.327	0.258741	0.30908
864	0.228819	0.165946	0.207611		864	0.329604	0.254802	0.315169
865	0.229036	0.167174	0.204575		865	0.32641	0.252917	0.31839
866	0.228977	0.168003	0.204788		866	0.323213	0.253818	0.318985
867	0.230178	0.169652	0.203369		867	0.319267	0.253666	0.318175
868	0.231545	0.172497	0.201202		868	0.318366	0.256427	0.316474
869	0.232162	0.177012	0.202818		869	0.317055	0.261868	0.311754
870	0.233871	0.180247	0.205406		870	0.312219	0.262701	0.309577
871	0.232388	0.180587	0.209636		871	0.306955	0.262241	0.309212
872	0.231899	0.18158	0.214303		872	0.299555	0.259528	0.307314
873	0.231741	0.181984	0.218299		873	0.292045	0.257011	0.302953
874	0.2331	0.181292	0.22107		874	0.282381	0.252605	0.299636
875	0.233117	0.182056	0.223606		875	0.278105	0.248729	0.294739
876	0.23118	0.181837	0.223393		876	0.271488	0.246367	0.290132
877	0.22869	0.183385	0.220869		877	0.267134	0.244528	0.287235
878	0.230383	0.186564	0.219057		878	0.263374	0.244652	0.28381
879	0.230666	0.186843	0.218839		879	0.260083	0.244246	0.281409
880	0.230355	0.184489	0.212876		880	0.254569	0.242638	0.282054
881	0.233344	0.187285	0.210462		881	0.25386	0.242824	0.27885
882	0.233929	0.187128	0.210355		882	0.250263	0.244058	0.275496
883	0.231159	0.187995	0.207503		883	0.24417	0.24146	0.270659
884	0.234176	0.189079	0.20734		884	0.24202	0.242655	0.267508
885	0.23647	0.191808	0.208877		885	0.238392	0.244583	0.259874
886	0.239286	0.192449	0.210942		886	0.232744	0.243816	0.25456
887	0.243403	0.191235	0.212005		887	0.229539	0.244221	0.250398
888	0.24699	0.190229	0.213627		888	0.228212	0.247016	0.25054
889	0.249516	0.189655	0.21288		889	0.223943	0.245471	0.24444
890	0.251944	0.189394	0.213558		890	0.220804	0.242202	0.240632
891	0.253231	0.18929	0.21209		891	0.220704	0.243613	0.236326
892	0.256006	0.194702	0.215003		892	0.221426	0.242983	0.232996
893	0.260259	0.195281	0.213134		893	0.220496	0.240175	0.22443
894	0.263034	0.198421	0.211809		894	0.222257	0.240965	0.221427
895	0.266227	0.201774	0.213088		895	0.222606	0.243807	0.216975
896	0.271714	0.203137	0.214463		896	0.223304	0.241306	0.213406
897	0.27253	0.202973	0.210813		897	0.222104	0.240942	0.208946
898	0.275647	0.206279	0.215475		898	0.220886	0.243653	0.208124
899	0.280026	0.209608	0.215051		899	0.219471	0.244914	0.207623
900	0.284052	0.213324	0.217498		900	0.218699	0.24772	0.205938
901	0.288976	0.216764	0.216513		901	0.217206	0.249761	0.205861
902	0.3006	0.217913	0.219482		902	0.217264	0.25231	0.204055
903	0.312157	0.218425	0.219808		903	0.220163	0.250721	0.201835
904	0.325528	0.219528	0.223999		904	0.218111	0.252001	0.197983
905	0.337814	0.219606	0.224647		905	0.218821	0.248998	0.196708
906	0.347133	0.221388	0.22712		906	0.219447	0.247984	0.194424
907	0.350757	0.225566	0.225443		907	0.221075	0.24632	0.192137
908	0.354614	0.225422	0.223337		908	0.217822	0.247876	0.191338
909	0.351586	0.226491	0.221125		909	0.222034	0.243868	0.191211
910	0.35227	0.226344	0.21563		910	0.223543	0.246619	0.192169
911	0.355889	0.224079	0.216413		911	0.221705	0.248193	0.193052
912	0.358011	0.219763	0.216711		912	0.219224	0.249814	0.196001
913	0.355766	0.217787	0.22013		913	0.221175	0.249606	0.196451
914	0.355869	0.214182	0.219727		914	0.219501	0.249538	0.196007
915	0.354689	0.211074	0.226155		915	0.218627	0.245612	0.192556
916	0.355707	0.211756	0.224726		916	0.218498	0.245244	0.190632
917	0.355222	0.213445	0.225186		917	0.218499	0.244009	0.185977
918	0.358586	0.212307	0.223632		918	0.219099	0.239815	0.184343
919	0.358314	0.211846	0.223508		919	0.220053	0.23976	0.182356
920	0.358707	0.212954	0.220618		920	0.221184	0.2415	0.183212
921	0.350096	0.209575	0.218872		921	0.22409	0.239197	0.183358
922	0.34825	0.206514	0.221117		922	0.224207	0.237784	0.183846
923	0.342029	0.208457	0.224455		923	0.224287	0.240164	0.182595
924	0.33573	0.206852	0.226464		924	0.226213	0.237326	0.183015
925	0.330403	0.206457	0.227453		925	0.225698	0.236904	0.182241
926	0.327553	0.205851	0.228787		926	0.225418	0.236152	0.182797
927	0.323611	0.207217	0.229649		927	0.228941	0.234179	0.182798
928	0.321293	0.206252	0.228263		928	0.232373	0.232501	0.182565
929	0.318249	0.205937	0.228542		929	0.230856	0.232537	0.182473
930	0.314492	0.203835	0.227393		930	0.231345	0.233695	0.184474
931	0.311666	0.203547	0.227935		931	0.230652	0.233581	0.182922
932	0.303138	0.201245	0.224096		932	0.231702	0.232144	0.180826
933	0.296	0.200597	0.221967		933	0.22873	0.232313	0.181141
934	0.290838	0.19951	0.220213		934	0.228664	0.230905	0.181783
935	0.285597	0.197987	0.220456		935	0.229809	0.227647	0.178799
936	0.280113	0.194792	0.22213		936	0.231555	0.225787	0.179222
937	0.27812	0.192264	0.22166		937	0.231347	0.22438	0.18104
938	0.275505	0.191686	0.221658		938	0.2329	0.223292	0.179618
939	0.274178	0.191117	0.223029		939	0.23762	0.223675	0.176982
940	0.269131	0.191005	0.222067		940	0.237509	0.222033	0.176721
941	0.264904	0.191573	0.219149		941	0.239069	0.223979	0.175508
942	0.261947	0.192711	0.221155		942	0.23705	0.224792	0.175538
943	0.257803	0.191144	0.222228		943	0.236701	0.221613	0.176182
944	0.251048	0.188419	0.220578		944	0.236942	0.223194	0.178588
945	0.249141	0.187251	0.221731		945	0.237643	0.222061	0.180195
946	0.24651	0.186917	0.22109		946	0.237981	0.221357	0.181585
947	0.240849	0.186338	0.221999		947	0.242719	0.221519	0.182125
948	0.236456	0.184977	0.224796		948	0.246582	0.223032	0.18218
949	0.234101	0.186264	0.228161		949	0.245761	0.222136	0.182531
950	0.229539	0.184237	0.22709		950	0.24501	0.222772	0.181475
951	0.226307	0.183414	0.234422		951	0.247651	0.219348	0.179918
952	0.2288	0.182654	0.235521		952	0.243029	0.220618	0.179913
953	0.22872	0.181723	0.231883		953	0.2403	0.221635	0.180463
954	0.228765	0.179936	0.234197		954	0.240897	0.220394	0.180765
955	0.228554	0.182935	0.240976		955	0.239728	0.218657	0.182546
956	0.23015	0.184394	0.240777		956	0.240496	0.220224	0.182623
957	0.22712	0.186454	0.243286		957	0.243186	0.219679	0.184413
958	0.227733	0.188322	0.248003		958	0.244085	0.219214	0.186749
959	0.224915	0.191548	0.248558		959	0.242536	0.22064	0.187507
960	0.22412	0.189158	0.24984		960	0.246437	0.220677	0.188462
961	0.220703	0.189206	0.24924		961	0.245206	0.221523	0.190843
962	0.219708	0.185141	0.246042		962	0.245405	0.220522	0.189078
963	0.215506	0.18312	0.245859		963	0.247433	0.221036	0.189726
964	0.216006	0.18053	0.24682		964	0.249785	0.222254	0.189373
965	0.218741	0.181349	0.244089		965	0.252942	0.222152	0.188728
966	0.21708	0.179802	0.246266		966	0.253253	0.223822	0.189274
967	0.214894	0.180779	0.250064		967	0.257574	0.226271	0.191802
968	0.216953	0.180535	0.254634		968	0.260123	0.227658	0.191163
969	0.214919	0.18093	0.256102		969	0.262787	0.229547	0.192131
970	0.210836	0.180246	0.259152		970	0.26694	0.231522	0.193661
971	0.212655	0.179418	0.257441		971	0.27483	0.230795	0.195848
972	0.215385	0.178174	0.262906		972	0.282659	0.229885	0.19643
973	0.214502	0.177216	0.266105		973	0.291487	0.229729	0.198571
974	0.219633	0.174211	0.271096		974	0.303868	0.222495	0.200021
975	0.221322	0.172145	0.274124		975	0.314805	0.219885	0.201382
976	0.223894	0.171355	0.281712		976	0.323788	0.221363	0.199454
977	0.224384	0.17189	0.280535		977	0.331698	0.218674	0.198958
978	0.22501	0.170789	0.275963		978	0.33895	0.216282	0.198422
979	0.22714	0.172383	0.278603		979	0.346114	0.218109	0.201217
980	0.225626	0.173706	0.284703		980	0.349721	0.220649	0.20298
981	0.224256	0.173138	0.291815		981	0.35118	0.217146	0.205337
982	0.223947	0.173417	0.29512		982	0.348919	0.219468	0.20749
983	0.224876	0.173756	0.302786		983	0.342231	0.219208	0.207548
984	0.223647	0.173311	0.300664		984	0.335434	0.220639	0.206087
985	0.225969	0.173139	0.301274		985	0.327515	0.2203	0.208942
986	0.225154	0.175769	0.299534		986	0.322057	0.220174	0.211041
987	0.223883	0.174715	0.297915		987	0.315847	0.218804	0.212288
988	0.222172	0.176608	0.295902		988	0.313956	0.218177	0.215548
989	0.221104	0.176716	0.299022		989	0.307192	0.216522	0.216103
990	0.222371	0.177369	0.301552		990	0.299585	0.216907	0.214105
991	0.224751	0.18137	0.303526		991	0.292814	0.218108	0.215589
992	0.2265	0.184544	0.303106		992	0.285141	0.220995	0.216903
993	0.229317	0.189385	0.310035		993	0.278963	0.221106	0.218426
994	0.228228	0.195498	0.312096		994	0.270857	0.223141	0.221329
995	0.229997	0.199599	0.312581		995	0.269696	0.224091	0.223385
996	0.229542	0.199421	0.306613		996	0.262905	0.224027	0.223672
997	0.228832	0.202083	0.314276		997	0.258454	0.223642	0.226924
998	0.227899	0.201414	0.31226		998	0.253011	0.224649	0.231656
999	0.22915	0.201448	0.310313		999	0.249637	0.225555	0.236674
1000	0.22757	0.200386	0.306399		1000	0.24323	0.22566	0.245112
1001	0.228075	0.199692	0.311461		1001	0.240584	0.227158	0.254484
1002	0.232565	0.197812	0.308764		1002	0.238951	0.226747	0.260026
1003	0.236157	0.199031	0.30302		1003	0.235777	0.228818	0.267061
1004	0.237624	0.198536	0.30076		1004	0.233481	0.229034	0.277165
1005	0.240368	0.198254	0.296986		1005	0.230254	0.230044	0.280179
1006	0.241379	0.197419	0.297656		1006	0.227033	0.231682	0.282647
1007	0.240183	0.198744	0.291876		1007	0.223642	0.233589	0.285313
1008	0.240501	0.197252	0.292615		1008	0.221028	0.233169	0.287611
1009	0.242958	0.19693	0.288465		1009	0.218941	0.233818	0.2859
1010	0.243593	0.197619	0.285881		1010	0.218484	0.232716	0.28592
1011	0.245818	0.199756	0.277604		1011	0.21826	0.23239	0.287916
1012	0.246335	0.203337	0.27719		1012	0.217211	0.232491	0.290248
1013	0.247274	0.206304	0.272575		1013	0.214252	0.233843	0.289729
1014	0.246704	0.208386	0.270193		1014	0.213966	0.233378	0.288549
1015	0.24603	0.211769	0.269177		1015	0.212829	0.23741	0.287829
1016	0.246264	0.213443	0.26337		1016	0.211463	0.23814	0.284593
1017	0.246917	0.213228	0.257559		1017	0.209751	0.236326	0.283609
1018	0.244482	0.214195	0.256442		1018	0.211166	0.237621	0.281019
1019	0.244656	0.214662	0.254477		1019	0.208102	0.238153	0.278726
1020	0.244399	0.216513	0.248903		1020	0.2071	0.234727	0.276371
1021	0.245296	0.220095	0.247416		1021	0.208188	0.233896	0.276189
1022	0.242688	0.220989	0.247144		1022	0.209381	0.235389	0.272033
1023	0.244229	0.223345	0.23973		1023	0.212045	0.23514	0.26613
1024	0.242965	0.225613	0.235589		1024	0.213323	0.235787	0.26399
1025	0.240421	0.224811	0.2278		1025	0.213711	0.235286	0.262639
1026	0.237778	0.222875	0.222885		1026	0.214228	0.233198	0.257762
1027	0.23887	0.222514	0.217834		1027	0.213789	0.231771	0.256948
1028	0.23779	0.220956	0.215363		1028	0.213742	0.232683	0.257039
1029	0.237355	0.221171	0.216104		1029	0.217416	0.23315	0.252401
1030	0.241424	0.223762	0.221214		1030	0.220707	0.236702	0.246369
1031	0.242922	0.227429	0.222448		1031	0.221817	0.238522	0.242718
1032	0.244067	0.231017	0.223197		1032	0.223982	0.240707	0.23688
1033	0.24591	0.233204	0.223037		1033	0.226619	0.241358	0.231054
1034	0.248993	0.235232	0.217715		1034	0.227854	0.241559	0.227287
1035	0.251545	0.235041	0.212409		1035	0.229419	0.2426	0.224012
1036	0.255312	0.234456	0.211094		1036	0.231266	0.245102	0.219749
1037	0.260068	0.232572	0.212011		1037	0.236412	0.245293	0.214421
1038	0.259287	0.232493	0.212115		1038	0.240874	0.245159	0.211755
1039	0.259196	0.234328	0.214475		1039	0.245319	0.247751	0.209171
1040	0.25765	0.23463	0.216486		1040	0.248906	0.245767	0.207689
1041	0.255979	0.236884	0.219055		1041	0.255649	0.244401	0.205359
1042	0.253416	0.240733	0.217796		1042	0.261976	0.24417	0.20474
1043	0.255606	0.244652	0.219165		1043	0.267544	0.242848	0.203222
1044	0.257435	0.243039	0.216178		1044	0.274117	0.240236	0.201234
1045	0.258423	0.24359	0.218231		1045	0.284754	0.243655	0.197299
1046	0.258894	0.245043	0.211522		1046	0.293431	0.245373	0.196067
1047	0.262887	0.244866	0.211067		1047	0.301526	0.245288	0.193155
1048	0.265362	0.243221	0.20917		1048	0.311017	0.247986	0.192643
1049	0.265142	0.246487	0.208027		1049	0.321665	0.250181	0.193173
1050	0.26738	0.246953	0.203287		1050	0.325409	0.250821	0.193578
1051	0.269789	0.243806	0.203418		1051	0.329057	0.253145	0.191773
1052	0.266666	0.240232	0.201394		1052	0.329511	0.258571	0.193719
1053	0.267865	0.241558	0.198778		1053	0.328762	0.258592	0.190408
1054	0.269574	0.238848	0.201226		1054	0.327884	0.262215	0.18759
1055	0.270698	0.239404	0.201169		1055	0.323237	0.262193	0.186375
1056	0.272026	0.239148	0.199609		1056	0.319406	0.264266	0.186213
1057	0.276658	0.239593	0.200911		1057	0.316389	0.262352	0.182933
1058	0.276233	0.23768	0.202979		1058	0.311237	0.265739	0.183651
1059	0.277981	0.23559	0.201295		1059	0.304482	0.266712	0.182966
1060	0.279483	0.23719	0.203575		1060	0.299322	0.271185	0.181484
1061	0.281607	0.237925	0.207789		1061	0.293941	0.275585	0.181693
1062	0.278285	0.237471	0.2066		1062	0.289021	0.281721	0.182347
1063	0.280047	0.236406	0.20792		1063	0.284209	0.284249	0.183549
1064	0.283749	0.235109	0.208825		1064	0.278351	0.290673	0.182502
1065	0.285117	0.230835	0.210625		1065	0.272417	0.296415	0.186473
1066	0.287477	0.231025	0.211171		1066	0.2668	0.299984	0.184807
1067	0.298309	0.233136	0.214657		1067	0.262092	0.303154	0.184626
1068	0.308569	0.230733	0.21488		1068	0.257613	0.306776	0.184273
1069	0.317347	0.230064	0.217396		1069	0.250961	0.303581	0.184898
1070	0.329774	0.229578	0.213177		1070	0.248694	0.3043	0.184103
1071	0.337985	0.228045	0.211802		1071	0.244861	0.302388	0.184362
1072	0.342794	0.223171	0.209316		1072	0.23999	0.302685	0.18583
1073	0.346963	0.220551	0.206226		1073	0.235389	0.303488	0.183809
1074	0.352171	0.221646	0.201462		1074	0.233346	0.306623	0.184363
1075	0.357302	0.221015	0.201821		1075	0.23141	0.305858	0.184343
1076	0.35946	0.218698	0.199319		1076	0.227026	0.308343	0.187646
1077	0.367925	0.220235	0.197614		1077	0.225265	0.307617	0.186865
1078	0.371424	0.224642	0.199336		1078	0.223519	0.309206	0.188387
1079	0.368988	0.226524	0.201867		1079	0.221321	0.311083	0.189652
1080	0.36976	0.229552	0.205263		1080	0.219505	0.309351	0.187209
1081	0.372705	0.232498	0.210428		1081	0.218513	0.308892	0.184983
1082	0.373959	0.234679	0.211134		1082	0.216	0.312217	0.185902
1083	0.3739	0.233559	0.214051		1083	0.212678	0.314009	0.187262
1084	0.375893	0.231715	0.212181		1084	0.209441	0.313844	0.186248
1085	0.374846	0.231223	0.211751		1085	0.208189	0.317356	0.188497
1086	0.374159	0.231017	0.209126		1086	0.209332	0.318938	0.189205
1087	0.367303	0.230517	0.211637		1087	0.206795	0.32041	0.186897
1088	0.365709	0.233104	0.209195		1088	0.205763	0.320686	0.184626
1089	0.367067	0.23558	0.210224		1089	0.207177	0.322437	0.186319
1090	0.364337	0.233906	0.209782		1090	0.205815	0.321026	0.186156
1091	0.368759	0.230502	0.210161		1091	0.203851	0.319594	0.185444
1092	0.368943	0.229129	0.208164		1092	0.20565	0.318234	0.188027
1093	0.37177	0.229454	0.208616		1093	0.206072	0.316054	0.189461
1094	0.370122	0.227718	0.211616		1094	0.204012	0.31944	0.187292
1095	0.37474	0.228838	0.213689		1095	0.204145	0.321135	0.185839
1096	0.372435	0.230621	0.218189		1096	0.202863	0.325032	0.186841
1097	0.373996	0.230184	0.220669		1097	0.202667	0.329182	0.185723
1098	0.375011	0.228598	0.223359		1098	0.203821	0.332967	0.186759
1099	0.3751	0.231132	0.222911		1099	0.205107	0.331628	0.188412
1100	0.368643	0.228696	0.224917		1100	0.204335	0.336044	0.191434
1101	0.370072	0.228971	0.222906		1101	0.206153	0.339682	0.191714
1102	0.369342	0.228125	0.226172		1102	0.203385	0.340587	0.192602
1103	0.36529	0.224457	0.229508		1103	0.201526	0.344721	0.193682
1104	0.364469	0.218882	0.236043		1104	0.201295	0.354013	0.193269
1105	0.368951	0.22349	0.237767		1105	0.202195	0.356169	0.196366
1106	0.363734	0.220667	0.243537		1106	0.201516	0.360917	0.197439
1107	0.360694	0.220772	0.24391		1107	0.205183	0.363657	0.201023
1108	0.359455	0.222523	0.244501		1108	0.206345	0.363431	0.202112
1109	0.360478	0.223845	0.244199		1109	0.207945	0.360595	0.203899
1110	0.358433	0.217654	0.246831		1110	0.208049	0.363541	0.203397
1111	0.357175	0.219346	0.24377		1111	0.209145	0.364157	0.208651
1112	0.357785	0.221529	0.247077		1112	0.207754	0.362281	0.209819
1113	0.360185	0.22397	0.253479		1113	0.207611	0.363611	0.214417
1114	0.356951	0.227796	0.252166		1114	0.207729	0.361774	0.219271
1115	0.354123	0.233512	0.249716		1115	0.20862	0.36282	0.224545
1116	0.352994	0.234539	0.25123		1116	0.208625	0.361532	0.227385
1117	0.35346	0.235393	0.249055		1117	0.209517	0.363139	0.235005
1118	0.350604	0.236187	0.243664		1118	0.209375	0.365738	0.240854
1119	0.351534	0.233711	0.247217		1119	0.210704	0.369533	0.250739
1120	0.350504	0.231806	0.250218		1120	0.211567	0.369766	0.262022
1121	0.352479	0.230072	0.254148		1121	0.210992	0.368803	0.273696
1122	0.350651	0.227917	0.255536		1122	0.214051	0.368911	0.281842
1123	0.349007	0.223297	0.258837		1123	0.216658	0.367149	0.288014
1124	0.345112	0.220592	0.259726		1124	0.217882	0.364648	0.290647
1125	0.342077	0.215952	0.261163		1125	0.219727	0.359547	0.293232
1126	0.341729	0.215389	0.263227		1126	0.223102	0.358288	0.290147
1127	0.340089	0.212796	0.265317		1127	0.223614	0.359149	0.292412
1128	0.34002	0.209682	0.264814		1128	0.227942	0.358259	0.291703
1129	0.346593	0.205364	0.265305		1129	0.230388	0.358286	0.292009
1130	0.348374	0.202637	0.264053		1130	0.234403	0.355746	0.289778
1131	0.343119	0.196593	0.261847		1131	0.237688	0.353012	0.290243
1132	0.341077	0.194572	0.264612		1132	0.240102	0.348043	0.287337
1133	0.337746	0.191702	0.263371		1133	0.242205	0.344654	0.287125
1134	0.329473	0.190144	0.263055		1134	0.245699	0.343004	0.285286
1135	0.326446	0.190247	0.272603		1135	0.248345	0.341945	0.283504
1136	0.325601	0.188927	0.279562		1136	0.251888	0.340979	0.284666
1137	0.325014	0.183489	0.279985		1137	0.255381	0.339503	0.282769
1138	0.322394	0.181832	0.286185		1138	0.257812	0.341455	0.284427
1139	0.319037	0.182106	0.296403		1139	0.258715	0.335295	0.285625
1140	0.315701	0.17945	0.299744		1140	0.261844	0.336754	0.287687
1141	0.313604	0.177174	0.303893		1141	0.263443	0.330938	0.287218
1142	0.312055	0.179395	0.305901		1142	0.269586	0.330105	0.287882
1143	0.310923	0.180515	0.310245		1143	0.275262	0.323042	0.286001
1144	0.307815	0.180788	0.306263		1144	0.28262	0.323157	0.285452
1145	0.305012	0.180574	0.30255		1145	0.289233	0.320051	0.281136
1146	0.300516	0.183698	0.300443		1146	0.297735	0.320655	0.277081
1147	0.294944	0.182552	0.304103		1147	0.304864	0.31837	0.274853
1148	0.290638	0.181688	0.305403		1148	0.309037	0.318529	0.272832
1149	0.286982	0.180537	0.308537		1149	0.31239	0.317913	0.265362
1150	0.284569	0.180219	0.311125		1150	0.315122	0.314683	0.262403
1151	0.282963	0.178423	0.310739		1151	0.314918	0.314115	0.261248
1152	0.281708	0.177882	0.312423		1152	0.310666	0.31595	0.258669
1153	0.280678	0.178118	0.31387		1153	0.309874	0.317426	0.253732
1154	0.283371	0.178901	0.312317		1154	0.308213	0.319848	0.25501
1155	0.280266	0.179442	0.310391		1155	0.307686	0.326007	0.2542
1156	0.281525	0.179471	0.309573		1156	0.307958	0.328939	0.252725
1157	0.280945	0.178929	0.309947		1157	0.308147	0.331836	0.250139
1158	0.278745	0.178923	0.301788		1158	0.304911	0.334407	0.248172
1159	0.274441	0.178431	0.298257		1159	0.300109	0.339181	0.247333
1160	0.274292	0.17765	0.298253		1160	0.292387	0.337977	0.24816
1161	0.267947	0.181284	0.297484		1161	0.285284	0.341436	0.243916
1162	0.265224	0.183503	0.289967		1162	0.27939	0.343266	0.240861
1163	0.263693	0.181752	0.292052		1163	0.27973	0.345174	0.242296
1164	0.265	0.181317	0.296762		1164	0.281276	0.341431	0.235986
1165	0.26433	0.180802	0.294226		1165	0.281105	0.344284	0.226882
1166	0.263592	0.177144	0.287785		1166	0.282403	0.342422	0.225977
1167	0.262497	0.17439	0.283596		1167	0.283165	0.3418	0.221676
1168	0.259773	0.174653	0.277251		1168	0.277953	0.342042	0.217847
1169	0.25813	0.174034	0.26641		1169	0.27393	0.344735	0.218456
1170	0.254565	0.172836	0.262031		1170	0.272564	0.342104	0.220981
1171	0.257396	0.17509	0.262602		1171	0.266783	0.344056	0.220006
1172	0.255751	0.17466	0.265895		1172	0.267862	0.344351	0.221802
1173	0.255133	0.175307	0.264652		1173	0.266114	0.341952	0.217412
1174	0.249092	0.175544	0.265624		1174	0.261655	0.337466	0.213632
1175	0.24794	0.177583	0.255729		1175	0.260386	0.337995	0.210638
1176	0.245503	0.17674	0.250352		1176	0.261652	0.335517	0.210792
1177	0.244517	0.178505	0.244742		1177	0.255562	0.330211	0.206974
1178	0.242646	0.177529	0.240102		1178	0.252254	0.327254	0.208617
1179	0.241571	0.177967	0.235707		1179	0.253565	0.325683	0.20822
1180	0.240895	0.17697	0.237458		1180	0.251655	0.32104	0.205159
1181	0.237839	0.176834	0.236829		1181	0.249196	0.320535	0.201957
1182	0.234798	0.175067	0.233728		1182	0.247168	0.319556	0.199616
1183	0.23541	0.176446	0.234155		1183	0.246237	0.316516	0.197642
1184	0.235795	0.176263	0.23201		1184	0.243578	0.316341	0.198315
1185	0.235678	0.178205	0.234346		1185	0.238678	0.315574	0.19848
1186	0.236411	0.174187	0.231986		1186	0.23441	0.311831	0.196233
1187	0.237171	0.175332	0.231861		1187	0.233196	0.309168	0.197287
1188	0.233478	0.176003	0.228914		1188	0.232149	0.310569	0.195727
1189	0.234186	0.173793	0.225206		1189	0.231115	0.310632	0.195405
1190	0.232366	0.172878	0.21902		1190	0.229651	0.310681	0.196111
1191	0.229237	0.176465	0.218012		1191	0.229418	0.31053	0.196055
1192	0.22861	0.178991	0.216949		1192	0.224925	0.311353	0.196634
1193	0.227831	0.176537	0.21477		1193	0.223584	0.308579	0.197733
1194	0.226218	0.178044	0.217914		1194	0.221792	0.305759	0.197688
1195	0.226113	0.178993	0.219185		1195	0.221579	0.303358	0.196222
1196	0.226115	0.181177	0.217733		1196	0.219518	0.301754	0.197546
1197	0.223738	0.182061	0.214486		1197	0.219516	0.299839	0.196772
1198	0.223666	0.187732	0.216037		1198	0.217332	0.300416	0.195064
1199	0.22144	0.192089	0.215059		1199	0.218074	0.299643	0.194264
1200	0.219578	0.195584	0.209126		1200	0.218131	0.300689	0.193219
1201	0.216859	0.199587	0.206592		1201	0.220229	0.29953	0.191732
1202	0.216404	0.203829	0.204289		1202	0.222217	0.298664	0.191196
1203	0.215624	0.206542	0.201848		1203	0.222297	0.298026	0.192107
1204	0.214267	0.208236	0.2014		1204	0.220266	0.300542	0.192643
1205	0.214504	0.208737	0.203509		1205	0.218652	0.300218	0.194704
1206	0.214789	0.210221	0.20218		1206	0.218362	0.301885	0.194561
1207	0.214705	0.210026	0.203426		1207	0.217452	0.306567	0.195159
1208	0.214822	0.211832	0.203263		1208	0.217634	0.307704	0.195669
1209	0.214723	0.211957	0.200097		1209	0.218353	0.306279	0.197321
1210	0.21346	0.21488	0.201442		1210	0.218449	0.308715	0.197591
1211	0.213759	0.213855	0.204045		1211	0.217208	0.31121	0.198092
1212	0.213365	0.21641	0.203457		1212	0.218098	0.311033	0.199816
1213	0.213196	0.215962	0.204144		1213	0.217981	0.3166	0.200871
1214	0.212086	0.218073	0.204635		1214	0.217032	0.315828	0.202217
1215	0.2129	0.216185	0.206634		1215	0.218253	0.31411	0.20312
1216	0.213452	0.216922	0.20667		1216	0.218664	0.311526	0.204613
1217	0.212381	0.214362	0.206575		1217	0.217875	0.308984	0.205491
1218	0.212075	0.214844	0.206251		1218	0.220337	0.306692	0.206472
1219	0.214598	0.21355	0.203849		1219	0.224563	0.306959	0.203368
1220	0.214376	0.21458	0.201595		1220	0.22539	0.308012	0.20302
1221	0.211379	0.21398	0.200825		1221	0.228732	0.312421	0.201516
1222	0.210939	0.216935	0.203653		1222	0.230743	0.316273	0.203145
1223	0.211842	0.21429	0.20351		1223	0.233516	0.316751	0.202003
1224	0.211877	0.214146	0.206995		1224	0.235976	0.320883	0.204725
1225	0.211947	0.214542	0.209797		1225	0.242766	0.324004	0.206599
1226	0.213668	0.211639	0.211977		1226	0.243159	0.322693	0.206323
1227	0.214465	0.2073	0.21143		1227	0.244706	0.323754	0.206504
1228	0.214705	0.20515	0.21327		1228	0.248728	0.324333	0.208688
1229	0.213602	0.205901	0.215093		1229	0.248934	0.326146	0.208207
1230	0.212476	0.203729	0.216196		1230	0.248719	0.327034	0.206441
1231	0.213632	0.204683	0.216744		1231	0.250517	0.328583	0.211624
1232	0.213226	0.204893	0.217427		1232	0.252936	0.329375	0.209386
1233	0.211658	0.205858	0.215235		1233	0.251256	0.32997	0.209441
1234	0.21244	0.202863	0.215604		1234	0.252035	0.329058	0.211574
1235	0.212235	0.202832	0.213808		1235	0.25226	0.329894	0.215571
1236	0.21113	0.202335	0.213043		1236	0.257827	0.332528	0.214503
1237	0.211713	0.202704	0.211124		1237	0.259422	0.333241	0.216379
1238	0.210917	0.199306	0.212123		1238	0.261245	0.331556	0.218942
1239	0.21044	0.202184	0.214803		1239	0.264779	0.333467	0.221576
1240	0.212601	0.200828	0.21355		1240	0.267663	0.334763	0.223194
1241	0.212334	0.200172	0.212869		1241	0.268824	0.334791	0.227563
1242	0.211479	0.198207	0.216245		1242	0.273302	0.337635	0.231397
1243	0.212292	0.203207	0.21934		1243	0.275003	0.342085	0.23541
1244	0.212166	0.200192	0.212715		1244	0.276137	0.343169	0.237925
1245	0.21082	0.201318	0.214082		1245	0.276021	0.344778	0.244511
1246	0.209554	0.199985	0.218267		1246	0.276231	0.345129	0.251522
1247	0.209329	0.200091	0.219598		1247	0.280137	0.347136	0.262603
1248	0.210581	0.196765	0.21889		1248	0.285571	0.347033	0.271767
1249	0.207849	0.196441	0.224651		1249	0.288767	0.346996	0.281994
1250	0.204954	0.194565	0.225678		1250	0.293961	0.34867	0.287432
1251	0.206482	0.195428	0.224874		1251	0.299612	0.349818	0.29457
1252	0.20838	0.195227	0.224711		1252	0.302855	0.347609	0.296345
1253	0.206529	0.194397	0.227047		1253	0.305689	0.351062	0.301807
1254	0.20882	0.192774	0.226321		1254	0.31023	0.35174	0.30525
1255	0.212898	0.192271	0.229272		1255	0.314332	0.350579	0.309649
1256	0.213571	0.191521	0.228397		1256	0.314103	0.354893	0.308559
1257	0.213811	0.191385	0.229614		1257	0.312659	0.359155	0.313332
1258	0.216165	0.193323	0.230168		1258	0.312945	0.360472	0.309989
1259	0.217541	0.195286	0.22907		1259	0.311354	0.362179	0.309815
1260	0.217834	0.194156	0.227806		1260	0.308236	0.365814	0.307866
1261	0.21905	0.192392	0.228112		1261	0.306472	0.367089	0.3089
1262	0.220667	0.19091	0.22486		1262	0.306078	0.368568	0.308193
1263	0.222043	0.190628	0.22402		1263	0.303134	0.370168	0.306104
1264	0.224689	0.188718	0.222804		1264	0.298862	0.373101	0.308312
1265	0.226128	0.190049	0.223003		1265	0.297907	0.372952	0.30684
1266	0.227348	0.191222	0.223471		1266	0.294763	0.371154	0.307591
1267	0.229146	0.191925	0.225862		1267	0.290979	0.369008	0.305915
1268	0.231311	0.190064	0.225643		1268	0.285351	0.368971	0.308096
1269	0.232026	0.190532	0.224133		1269	0.281137	0.371883	0.306911
1270	0.234441	0.19094	0.222154		1270	0.277216	0.371535	0.304526
1271	0.235641	0.191644	0.221492		1271	0.27387	0.36975	0.303231
1272	0.238981	0.193058	0.223313		1272	0.270515	0.369135	0.302032
1273	0.241086	0.193686	0.225756		1273	0.2706	0.367555	0.298131
1274	0.245281	0.194651	0.228385		1274	0.267827	0.365389	0.293902
1275	0.247948	0.194823	0.230877		1275	0.26145	0.367035	0.295722
1276	0.251996	0.193008	0.231958		1276	0.259512	0.367311	0.291557
1277	0.25241	0.191463	0.228744		1277	0.254953	0.36569	0.291563
1278	0.25396	0.190175	0.228277		1278	0.249193	0.364558	0.296284
1279	0.253111	0.188439	0.232587		1279	0.247528	0.360207	0.293184
1280	0.253612	0.187329	0.234108		1280	0.246684	0.358916	0.290536
1281	0.256507	0.185709	0.235631		1281	0.244438	0.358108	0.289028
1282	0.262803	0.186265	0.236049		1282	0.242414	0.360262	0.285255
1283	0.267039	0.18761	0.235444		1283	0.240092	0.3632	0.27812
1284	0.272436	0.18684	0.232906		1284	0.235439	0.362468	0.273159
1285	0.278302	0.188451	0.231423		1285	0.231292	0.363388	0.270929
1286	0.285663	0.190911	0.230629		1286	0.225845	0.366162	0.270155
1287	0.293544	0.186225	0.228766		1287	0.222277	0.363523	0.265949
1288	0.306946	0.182748	0.227583		1288	0.219259	0.363271	0.265318
1289	0.322084	0.181234	0.228432		1289	0.218916	0.366516	0.267379
1290	0.335741	0.177775	0.229019		1290	0.217241	0.360976	0.264148
1291	0.346295	0.175381	0.22679		1291	0.216948	0.356968	0.261431
1292	0.355888	0.177224	0.229067		1292	0.21613	0.35985	0.258467
1293	0.359806	0.179512	0.229785		1293	0.215328	0.356353	0.25224
1294	0.367205	0.17905	0.230401		1294	0.213447	0.353671	0.248861
1295	0.37133	0.180249	0.231417		1295	0.212226	0.350773	0.246929
1296	0.37159	0.181773	0.233778		1296	0.210601	0.355159	0.242259
1297	0.372311	0.181496	0.231658		1297	0.208514	0.354782	0.238074
1298	0.37433	0.179433	0.232229		1298	0.209554	0.352909	0.238512
1299	0.371811	0.180584	0.230786		1299	0.209814	0.354321	0.235995
1300	0.370714	0.178899	0.229637		1300	0.210818	0.355083	0.232246

## Sheet: graph
Figure3B
Fluctuation-positive cells (%)					Fluctuation amplitude (ΔF340/F380)
Npr2fl/fl, Col2a1-Cre-/-		Npr2fl/fl, Col2a1-Cre+/-			Npr2fl/fl, Col2a1-Cre-/-		Npr2fl/fl, Col2a1-Cre+/-
Basal	+NS1619	Basal	+NS1619		Basal	+NS1619	Basal	+NS1619
23.3333	50	33.3333	53.3333		0.0374135	0.0729639	0.0424705	0.0799949
26.6667	60	30	63.3333		0.0342932	0.0689741	0.0425908	0.073975
30	76.6667	26.6667	73.3333		0.0395984	0.0741087	0.0416723	0.0743449
30	56.6667	33.3333	56.6667		0.0432288	0.0757817	0.0323424	0.0645535
