# Supplementary material for: C-type natriuretic peptide facilitates autonomic Ca2+ entry in growth plate chondrocytes for stimulating bone growth
Source: eLife. 2022 Mar 15;11:e71931. doi: 10.7554/eLife.71931 (PMC8923661; doi:10.7554/eLife.71931)
Supplement: Figure 4—source data 1. [file elife-71931-fig4-data1.xlsx]

## Sheet: trace
Figure 4A
Time (s)	Vehicle	CNP (300 nM)
0	0.180958	0.0666263
7	0.162481	0.110475
14	0.16057	0.0899118
21	0.188276	0.0843516
28	0.196779	0.0803907
35	0.180029	0.117649
42	0.157926	0.113055
49	0.178421	0.0986598
56	0.155083	0.11822
63	0.149453	0.105109
70	0.179928	0.103183
77	0.17472	0.114352
84	0.180292	0.0854338
91	0.170864	0.0896948
98	0.183486	0.107406
105	0.166519	0.111242
112	0.188629	0.101123
119	0.1895	0.127815
126	0.166239	0.106821
133	0.140301	0.10291
140	0.174471	0.118637
147	0.175137	0.0746601
154	0.203801	0.106702
161	0.1828	0.116889
168	0.186585	0.0711327
175	0.181582	0.0885376
182	0.177302	0.104886
189	0.194148	0.0982721
196	0.1331	0.0640482
203	0.217504	0.0862293
210	0.193904	0.105108
217	0.183195	0.110599
224	0.188886	0.0855162
231	0.204863	0.105139
238	0.180451	0.141764
245	0.163875	0.102196
252	0.184491	0.123472
259	0.180437	0.11292
266	0.171327	0.0816671
273	0.174897	0.117157
280	0.206268	0.0912545
287	0.17085	0.124103
294	0.186599	0.101081
301	0.17525	0.10965
308	0.196999	0.0961302
315	0.193168	0.103964
322	0.191742	0.104682
329	0.153572	0.117638
336	0.16905	0.116878
343	0.204217	0.12507
350	0.20038	0.105491
357	0.207623	0.109196
364	0.17429	0.107083
371	0.195758	0.120867
378	0.178443	0.11227
385	0.164029	0.111979
392	0.191289	0.0673875
399	0.165713	0.0740983
406	0.202485	0.0817442
413	0.206641	0.110598
420	0.189024	0.116901
427	0.18676	0.110778
434	0.161872	0.12201
441	0.178373	0.124529
448	0.176685	0.0990921
455	0.182784	0.11341
462	0.195565	0.0990348
469	0.213104	0.127601
476	0.202131	0.107821
483	0.210617	0.105466
490	0.192575	0.0930792
497	0.161379	0.0961527
504	0.176215	0.114523
511	0.138381	0.109964
518	0.191634	0.119416
525	0.187979	0.0913721
532	0.209286	0.107831
539	0.199317	0.116113
546	0.199037	0.128025
553	0.194339	0.117094
560	0.233061	0.110222
567	0.207252	0.122676
574	0.265056	0.115187
581	0.248733	0.165713
588	0.21384	0.147052
595	0.204374	0.155595
602	0.276782	0.155962
609	0.268446	0.189097
616	0.300116	0.164853
623	0.278723	0.176792
630	0.268361	0.151764
637	0.279024	0.192404
644	0.300825	0.154484
651	0.33156	0.184483
658	0.294901	0.192634
665	0.311607	0.175799
672	0.32739	0.228575
679	0.286977	0.229993
686	0.332579	0.204264
693	0.334774	0.243443
700	0.306954	0.14529
707	0.320681	0.227949
714	0.339627	0.246158
721	0.341291	0.285164
728	0.319874	0.254923
735	0.352042	0.258979
742	0.29182	0.248188
749	0.313446	0.250455
756	0.369009	0.233514
763	0.320172	0.301687
770	0.359879	0.280438
777	0.400138	0.293512
784	0.357091	0.259146
791	0.373405	0.282423
798	0.301069	0.282314
805	0.346157	0.296866
812	0.342191	0.340967
819	0.318577	0.298029
826	0.368413	0.267536
833	0.389749	0.315079
840	0.343391	0.27224
847	0.361339	0.258522
854	0.348831	0.316322
861	0.383058	0.337676
868	0.337216	0.323894
875	0.362596	0.278712
882	0.383004	0.324548
889	0.384688	0.337894
896	0.368005	0.315995
903	0.389941	0.335883
910	0.366749	0.308304
917	0.369265	0.310531
924	0.351589	0.301935
931	0.327989	0.349934
938	0.343139	0.288495
945	0.317948	0.322806
952	0.366726	0.310602
959	0.357636	0.285013
966	0.384957	0.301287
973	0.333625	0.351637
980	0.36978	0.307303
987	0.342626	0.309607
994	0.368801	0.329206
1001	0.364051	0.317881
1008	0.361196	0.340229
1015	0.404265	0.365053
1022	0.371912	0.35512
1029	0.407652	0.30172
1036	0.353392	0.331199
1043	0.349621	0.321127
1050	0.3805	0.300054
1057	0.397227	0.312794
1064	0.399534	0.350266
1071	0.370314	0.344928
1078	0.426997	0.339362
1085	0.386153	0.343293
1092	0.39238	0.365917
1099	0.378523	0.355522
1106	0.37912	0.368055
1113	0.384861	0.378578
1120	0.399804	0.376932
1127	0.387152	0.36365
1134	0.418549	0.34854
1141	0.437986	0.380274
1148	0.391887	0.344626
1155	0.397573	0.374206
1162	0.397414	0.419047
1169	0.407028	0.390544
1176	0.428167	0.384838
1183	0.445856	0.443058
1190	0.420833	0.42364
1197	0.433195	0.392519
1204	0.495887	0.416806
1211	0.45073	0.421353
1218	0.467258	0.437268
1225	0.483305	0.447204
1232	0.451417	0.462554
1239	0.440231	0.433896
1246	0.481432	0.461737
1253	0.463995	0.447006
1260	0.466266	0.451097
1267	0.461684	0.467473
1274	0.474686	0.445802
1281	0.510053	0.4851
1288	0.474879	0.46612
1295	0.46249	0.512126
1302	0.511119	0.453149
1309	0.456688	0.508089
1316	0.479702	0.465522
1323	0.47651	0.426476
1330	0.466635	0.46369
1337	0.497073	0.506995
1344	0.512053	0.485975
1351	0.502116	0.531078
1358	0.492269	0.5026
1365	0.54385	0.492592
1372	0.544683	0.50185
1379	0.54891	0.493352
1386	0.4717	0.539266
1393	0.530106	0.514175
1400	0.543047	0.524912
1407	0.525717	0.467727
1414	0.498584	0.541401
1421	0.523838	0.536436
1428	0.551268	0.504996
1435	0.506641	0.540021
1442	0.5354	0.565508
1449	0.50063	0.504426
1456	0.497591	0.48659
1463	0.537626	0.52265
1470	0.539418	0.518927
1477	0.595059	0.523287
1484	0.571122	0.528049
1491	0.508645	0.538057
1498	0.504858	0.542378
1505	0.493703	0.538339
1512	0.51609	0.554273
1519	0.524714	0.535438
1526	0.542737	0.489805
1533	0.55116	0.535682
1540	0.5199	0.540882
1547	0.507557	0.578064
1554	0.526538	0.601524
1561	0.501438	0.536929
1568	0.534821	0.529054
1575	0.520294	0.546487
1582	0.495006	0.588521
1589	0.541367	0.574046
1596	0.549168	0.557837
1603	0.568755	0.540382
1610	0.551293	0.557661
1617	0.526575	0.527831
1624	0.487685	0.556702
1631	0.533761	0.538646
1638	0.578005	0.616754
1645	0.480845	0.596385
1652	0.550324	0.536465
1659	0.550936	0.579718
1666	0.561393	0.580519
1673	0.594965	0.578689
1680	0.542626	0.579994
1687	0.612823	0.547073
1694	0.555523	0.542979
1701	0.616443	0.582656
1708	0.505269	0.598224
1715	0.570482	0.590809
1722	0.575122	0.568526
1729	0.578004	0.63312
1736	0.553461	0.587614
1743	0.544495	0.551415
1750	0.593897	0.566619
1757	0.607279	0.620559
1764	0.612315	0.58003
1771	0.588374	0.593239
1778	0.62039	0.561524
1785	0.680625	0.620758
1792	0.657761	0.63334
1799	0.64269	0.647615
1806	0.553081	0.650403
1813	0.676358	0.622986
1820	0.621426	0.622424
1827	0.664985	0.624132
1834	0.671867	0.677866
1841	0.640545	0.663123
1848	0.655981	0.629878
1855	0.647254	0.622043
1862	0.656296	0.668621
1869	0.699243	0.67548
1876	0.653592	0.620148
1883	0.642931	0.619012
1890	0.713144	0.665446
1897	0.652796	0.68044
1904	0.653323	0.646822
1911	0.714059	0.634776
1918	0.654846	0.683936
1925	0.679886	0.701839
1932	0.702872	0.702832
1939	0.703023	0.689123
1946	0.716757	0.664027
1953	0.692044	0.692992
1960	0.71621	0.671559
1967	0.740488	0.709427
1974	0.703617	0.708632
1981	0.706735	0.680554
1988	0.649092	0.67199
1995	0.746328	0.674544
2002	0.690482	0.690695
2009	0.707137	0.747563
2016	0.717981	0.731914
2023	0.730169	0.694255
2030	0.739793	0.718473
2037	0.703372	0.675799
2044	0.718187	0.712
2051	0.699267	0.737369
2058	0.726508	0.693775
2065	0.740887	0.732904
2072	0.767767	0.725807
2079	0.75865	0.687156
2086	0.743372	0.71146
2093	0.719027	0.735722
2100	0.765936	0.670024
2107	0.706679	0.700741
2114	0.73451	0.754791
2121	0.710057	0.713488
2128	0.777236	0.679317
2135	0.731693	0.687239
2142	0.731964	0.670784
2149	0.759231	0.683622
2156	0.7802	0.716922
2163	0.651597	0.696522
2170	0.669799	0.686171
2177	0.754088	0.667229
2184	0.740694	0.685823
2191	0.759315	0.70227
2198	0.688689	0.758127
2205	0.793271	0.711818
2212	0.780289	0.732317
2219	0.737276	0.710345
2226	0.721449	0.744312
2233	0.705943	0.716655
2240	0.80315	0.763935
2247	0.766453	0.716151
2254	0.77301	0.710273
2261	0.802998	0.763481
2268	0.731296	0.739575
2275	0.762755	0.756287
2282	0.752502	0.694903
2289	0.783995	0.765238
2296	0.76711	0.722385
2303	0.692303	0.728687
2310	0.756384	0.738522
2317	0.729516	0.730539
2324	0.793622	0.720718
2331	0.745588	0.73911
2338	0.721948	0.757117
2345	0.742965	0.747938
2352	0.810472	0.717651
2359	0.791883	0.767914
2366	0.750126	0.769992
2373	0.807094	0.746906
2380	0.810151	0.782476
2387	0.831215	0.78412
2394	0.801254	0.774332
2401	0.854516	0.773646
2408	0.859057	0.786088
2415	0.857271	0.836588
2422	0.78396	0.752295
2429	0.862048	0.80141
2436	0.874401	0.842194
2443	0.927773	0.811536
2450	0.920769	0.851363
2457	0.817373	0.860664
2464	0.907102	0.84068
2471	0.893138	0.767802
2478	0.932096	0.845907
2485	0.900356	0.842729
2492	0.941406	0.846108
2499	0.856706	0.867996
2506	0.899239	0.8859
2513	0.932774	0.902629
2520	0.910223	0.918846
2527	0.969865	0.912692
2534	0.934475	0.93422
2541	0.977124	0.938584
2548	0.97569	0.944451
2555	0.93155	0.930256
2562	0.998215	0.927424
2569	0.95654	0.926584
2576	0.9403	0.931614
2583	0.905532	0.963373
2590	0.925916	0.936284
2597	0.964502	0.952698
2604	0.992615	0.975102
2611	0.982526	0.96055
2618	0.960424	0.964292
2625	0.993946	0.959325
2632	0.973978	0.990956
2639	0.966048	0.977358
2646	0.956063	0.985731
2653	1.02829	0.958226
2660	1.01248	0.890014
2667	1.01806	0.997011
2674	0.963999	0.985229
2681	1.03322	1.01185
2688	1.01581	1.00784
2695	0.972893	0.968083
2702	0.991719	1.03483
2709	1.0147	1.00262
2716	0.95937	0.958603
2723	1.02865	0.986005
2730	1.00928	0.964354
2737	1.01427	1.0281
2744	1.03516	0.966495
2751	0.985264	1.05093
2758	1.00233	1.01055
2765	1.01515	0.99193
2772	1.00694	0.977408
2779	1.0028	0.967294
2786	0.988381	0.999921
2793	0.977283	1.06987
2800	1.02718	0.991717
2807	0.967988	0.992274
2814	0.990736	1.07142
2821	1.02	0.974256
2828	1.00161	1.03606
2835	0.992214	1.01137
2842	1.01576	0.971075
2849	0.969115	1.01537
2856	1.01006	1.02456
2863	0.983327	1.03177
2870	0.97757	1.00951
2877	1.00589	0.991376
2884	1.00839	0.978764
2891	1.03767	0.966197

## Sheet: graph
Figure4A
Resting
Vehicle	CNP
0.263488	0.171486
0.151057	0.168159
0.186811	0.220952
0.215335	0.165243
0.210626	0.126115
0.16414	0.0940724
0.187119	0.0981825
0.160158	0.084349
0.22162	0.104621
0.151719	0.0586122
0.155823	0.147747
0.142845	0.115968
0.178763	0.118399
0.155505	0.134943
0.166883	0.103017
0.14318	0.0962338
0.170211	0.0619063
0.134301	0.107892
0.194679	0.101924
0.143433	0.117441
0.150588	0.0807951
0.124864	0.0907267
0.130975	0.0987018
0.104349	0.0980928
0.155311	0.0726943
0.143029	0.127327
0.233109	0.0924185
0.138646	0.106538
0.252619	0.0880233
0.184353	0.13595
0.148969	0.121999
0.174752	0.111205
0.251509	0.117148
0.136973	0.0673832
0.193954	0.100625
0.168719	0.109538
0.166255	0.0492304
0.168409	0.0965517
0.152456	0.13683
0.198906	0.114488
