# Supplementary material for: C-type natriuretic peptide facilitates autonomic Ca2+ entry in growth plate chondrocytes for stimulating bone growth
Source: eLife. 2022 Mar 15;11:e71931. doi: 10.7554/eLife.71931 (PMC8923661; doi:10.7554/eLife.71931)
Supplement: Figure 4—source data 2. [file elife-71931-fig4-data2.xlsx]

## Sheet: trace
Figure 4B
Paxilline (10 mM)
Time (s)	Vehicle	CNP (300 nM)
0	0.170528	0.11904
7	0.169159	0.10875
14	0.180705	0.12948
21	0.177386	0.11261
28	0.166045	0.123108
35	0.149274	0.122621
42	0.170064	0.11438
49	0.196371	0.112489
56	0.168846	0.104563
63	0.164102	0.100405
70	0.157264	0.110007
77	0.172106	0.119874
84	0.156855	0.0977167
91	0.136757	0.123162
98	0.188815	0.125592
105	0.17022	0.126853
112	0.158597	0.11441
119	0.177845	0.115188
126	0.177843	0.110411
133	0.190049	0.107622
140	0.155679	0.108572
147	0.180833	0.105298
154	0.160315	0.114632
161	0.168043	0.0988912
168	0.174136	0.122015
175	0.192992	0.126689
182	0.174129	0.107445
189	0.189982	0.111301
196	0.179481	0.103513
203	0.158469	0.114802
210	0.172605	0.0928358
217	0.190111	0.121499
224	0.164788	0.108469
231	0.18731	0.126216
238	0.182977	0.11043
245	0.160965	0.122668
252	0.152788	0.0997469
259	0.181367	0.134872
266	0.155687	0.127053
273	0.18478	0.106647
280	0.163457	0.133466
287	0.197292	0.123272
294	0.179684	0.129642
301	0.169444	0.107545
308	0.185575	0.0959174
315	0.19557	0.129283
322	0.157444	0.127833
329	0.172002	0.13709
336	0.173275	0.139002
343	0.182068	0.166931
350	0.19035	0.146143
357	0.188983	0.161416
364	0.179841	0.180427
371	0.208399	0.173792
378	0.186211	0.192839
385	0.215019	0.182569
392	0.210283	0.198886
399	0.21677	0.186741
406	0.210034	0.185829
413	0.228408	0.219403
420	0.188271	0.215023
427	0.19381	0.192766
434	0.245118	0.227747
441	0.23753	0.228543
448	0.217648	0.228083
455	0.229888	0.216315
462	0.214166	0.227288
469	0.221394	0.251454
476	0.175519	0.263059
483	0.230399	0.252347
490	0.240383	0.226755
497	0.251511	0.251415
504	0.22455	0.255022
511	0.209711	0.227821
518	0.215597	0.240334
525	0.238368	0.247401
532	0.265285	0.255414
539	0.239301	0.238667
546	0.245997	0.258042
553	0.249847	0.267645
560	0.264618	0.230154
567	0.262538	0.261079
574	0.255749	0.277337
581	0.25479	0.268109
588	0.273242	0.236488
595	0.277242	0.260602
602	0.258014	0.286775
609	0.265247	0.269778
616	0.271133	0.260985
623	0.254634	0.272635
630	0.268842	0.272346
637	0.279507	0.256671
644	0.279696	0.27708
651	0.264772	0.277663
658	0.252367	0.24284
665	0.246959	0.258276
672	0.28409	0.296634
679	0.278545	0.310351
686	0.27504	0.271472
693	0.263871	0.268604
700	0.265018	0.300327
707	0.251142	0.278199
714	0.278775	0.274179
721	0.269	0.268316
728	0.261772	0.311213
735	0.255586	0.281099
742	0.264085	0.277444
749	0.28613	0.291339
756	0.272926	0.285785
763	0.295017	0.322367
770	0.276103	0.285342
777	0.300806	0.291267
784	0.280906	0.269146
791	0.290938	0.298484
798	0.276679	0.278448
805	0.292776	0.309349
812	0.293725	0.287337
819	0.282057	0.311474
826	0.259656	0.277468
833	0.315719	0.290111
840	0.296589	0.283136
847	0.291066	0.27968
854	0.28648	0.303115
861	0.267053	0.300954
868	0.352691	0.288808
875	0.327337	0.285906
882	0.313599	0.2839
889	0.292155	0.295212
896	0.319886	0.306368
903	0.305249	0.288377
910	0.311081	0.298102
917	0.325873	0.288249
924	0.343631	0.311396
931	0.311675	0.296093
938	0.310885	0.315103
945	0.347068	0.302111
952	0.309705	0.280882
959	0.305351	0.307911
966	0.310039	0.298385
973	0.310842	0.291566
980	0.28495	0.320619
987	0.29384	0.302117
994	0.330667	0.288738
1001	0.329089	0.302376
1008	0.284558	0.306325
1015	0.309485	0.331309
1022	0.32386	0.299953
1029	0.309937	0.313414
1036	0.317772	0.317339
1043	0.320733	0.327866
1050	0.330554	0.327104
1057	0.311722	0.31279
1064	0.306945	0.314196
1071	0.325904	0.313646
1078	0.304421	0.312224
1085	0.330136	0.311744
1092	0.292917	0.327855
1099	0.287501	0.308456
1106	0.323192	0.300894
1113	0.3175	0.332698
1120	0.321612	0.318244
1127	0.329796	0.305064
1134	0.329281	0.304325
1141	0.298079	0.305853
1148	0.307757	0.299177
1155	0.317558	0.328728
1162	0.286741	0.296029
1169	0.339257	0.3405
1176	0.330655	0.305616
1183	0.296401	0.309861
1190	0.327433	0.299078
1197	0.306647	0.290851
1204	0.342417	0.330919
1211	0.32225	0.353057
1218	0.315897	0.328743
1225	0.324907	0.336455
1232	0.309599	0.321684
1239	0.323067	0.337523
1246	0.312046	0.360395
1253	0.339524	0.305598
1260	0.315129	0.312607
1267	0.311638	0.295349
1274	0.325049	0.322025
1281	0.301067	0.332287
1288	0.316118	0.348636
1295	0.330565	0.315943
1302	0.289904	0.327038
1309	0.348407	0.314971
1316	0.308182	0.334595
1323	0.312618	0.326657
1330	0.338368	0.317684
1337	0.34054	0.328323
1344	0.333553	0.320494
1351	0.302557	0.297581
1358	0.333681	0.330453
1365	0.307909	0.316577
1372	0.323635	0.348288
1379	0.325254	0.3211
1386	0.335145	0.319325
1393	0.305463	0.330389
1400	0.326583	0.319862
1407	0.3335	0.301375
1414	0.328177	0.330404
1421	0.331952	0.304136
1428	0.309453	0.31387
1435	0.324883	0.301765
1442	0.330197	0.309382
1449	0.346356	0.338906
1456	0.296687	0.335585
1463	0.336923	0.303109
1470	0.343648	0.326472
1477	0.346025	0.310509
1484	0.336788	0.308468
1491	0.309973	0.309026
1498	0.313918	0.325505
1505	0.321407	0.310841
1512	0.331145	0.28575
1519	0.340964	0.325938

## Sheet: graph
Figure4B
Paxilline
Vehicle	CNP
0.347891	0.221542
0.371118	0.331791
0.378927	0.392271
0.373703	0.385278
0.349331	0.38332
0.390613	0.416425
0.393783	0.410171
0.340758	0.333975
0.338366	0.247303
0.39086	0.232844
0.28013	0.251818
0.278767	0.29293
0.268361	0.250966
0.269706	0.318921
0.283533	0.286465
0.377723	0.261236
0.331316	0.269557
0.260326	0.295232
0.289845	0.243985
0.264808	0.22155
0.255869	0.246213
0.245607	0.236109
0.264789	0.283268
0.32306	0.273109
0.238518	0.282481
0.271158	0.255263
0.245947	0.251965
0.311317	0.31178
0.25654	0.238497
0.289037	0.305677
0.274175	0.416547
0.328462	0.389788
0.271908	0.362734
0.345123	0.22425
0.265722	0.247531
0.261984	0.358891
0.323382	0.194435
0.271183	0.380377
0.291716	0.418385
0.350994	0.390806
