# Supplementary material for: C-type natriuretic peptide facilitates autonomic Ca2+ entry in growth plate chondrocytes for stimulating bone growth
Source: eLife. 2022 Mar 15;11:e71931. doi: 10.7554/eLife.71931 (PMC8923661; doi:10.7554/eLife.71931)
Supplement: Figure 4—source data 3. [file elife-71931-fig4-data3.xlsx]

## Sheet: trace
Figure 4C
20 mM KCl
NS1619 (30 mM)
Time (s)	Vehicle	CNP (300 nM)
0	0.181338	0.119142
7	0.187389	0.109992
14	0.174151	0.109877
21	0.176855	0.13948
28	0.176821	0.107667
35	0.16015	0.108779
42	0.207119	0.118719
49	0.20554	0.117382
56	0.202433	0.116796
63	0.179827	0.122609
70	0.18838	0.0921898
77	0.159794	0.106759
84	0.170994	0.118269
91	0.176607	0.0984122
98	0.171894	0.10962
105	0.188001	0.106681
112	0.183263	0.115091
119	0.190889	0.1039
126	0.16247	0.1147
133	0.177223	0.0940084
140	0.198848	0.106398
147	0.188115	0.109965
154	0.176454	0.111839
161	0.175166	0.0861945
168	0.185381	0.105249
175	0.210367	0.10663
182	0.187039	0.115063
189	0.174232	0.117211
196	0.216907	0.124625
203	0.177907	0.123356
210	0.202936	0.123484
217	0.207703	0.0960498
224	0.17369	0.108439
231	0.167217	0.114971
238	0.162665	0.119807
245	0.166386	0.103225
252	0.176995	0.0829281
259	0.179642	0.140542
266	0.169466	0.103763
273	0.162433	0.108101
280	0.180626	0.0991648
287	0.165057	0.103903
294	0.17002	0.12297
301	0.189942	0.132832
308	0.168161	0.120478
315	0.182302	0.117244
322	0.16443	0.14065
329	0.179021	0.1185
336	0.157852	0.13108
343	0.168781	0.12353
350	0.171514	0.121996
357	0.170447	0.142915
364	0.189938	0.142192
371	0.198612	0.120641
378	0.201681	0.130229
385	0.220069	0.156164
392	0.201524	0.163207
399	0.219632	0.149486
406	0.232027	0.168271
413	0.249434	0.158719
420	0.230421	0.148339
427	0.251229	0.174081
434	0.229665	0.177571
441	0.271234	0.189311
448	0.279226	0.193012
455	0.267523	0.183544
462	0.239142	0.204943
469	0.221613	0.195926
476	0.260856	0.217261
483	0.269857	0.209052
490	0.242367	0.196962
497	0.263297	0.220091
504	0.266449	0.20831
511	0.259299	0.217277
518	0.278111	0.224223
525	0.238823	0.237868
532	0.268943	0.233841
539	0.305646	0.22052
546	0.271431	0.220824
553	0.318666	0.22074
560	0.273255	0.220926
567	0.325978	0.216362
574	0.291051	0.24711
581	0.249512	0.217068
588	0.302165	0.247364
595	0.283967	0.24356
602	0.289539	0.273002
609	0.309851	0.244416
616	0.302909	0.236084
623	0.29755	0.236415
630	0.334522	0.264023
637	0.288244	0.228384
644	0.2905	0.229245
651	0.310256	0.250659
658	0.299334	0.25014
665	0.28304	0.240502
672	0.291157	0.232545
679	0.286215	0.24705
686	0.274003	0.243523
693	0.295697	0.262089
700	0.286398	0.237839
707	0.286644	0.248252
714	0.280517	0.242784
721	0.321863	0.25224
728	0.310069	0.241329
735	0.293971	0.257091
742	0.310258	0.248925
749	0.318947	0.242619
756	0.321647	0.277978
763	0.29264	0.267927
770	0.297435	0.251991
777	0.332289	0.247018
784	0.342195	0.260816
791	0.322116	0.257557
798	0.308743	0.261331
805	0.326052	0.26177
812	0.313264	0.270519
819	0.3351	0.24672
826	0.313183	0.292766
833	0.314543	0.262755
840	0.322804	0.293267
847	0.311295	0.254889
854	0.277045	0.294162
861	0.346005	0.282455
868	0.275963	0.252229
875	0.336358	0.267492
882	0.326964	0.261695
889	0.311247	0.294449
896	0.309336	0.273597
903	0.306518	0.290759
910	0.310476	0.274927
917	0.332108	0.269308
924	0.317146	0.27214
931	0.328051	0.304119
938	0.308221	0.281814
945	0.332938	0.271788
952	0.324465	0.278443
959	0.312398	0.256836
966	0.294363	0.272768
973	0.31133	0.256471
980	0.327539	0.272874
987	0.329049	0.2931
994	0.31925	0.28901
1001	0.306753	0.28129
1008	0.316569	0.299266
1015	0.334761	0.311274
1022	0.311928	0.292158
1029	0.304438	0.263466
1036	0.329571	0.278062
1043	0.298884	0.267501
1050	0.293194	0.305628
1057	0.324225	0.279988
1064	0.31396	0.285234
1071	0.309299	0.284729
1078	0.33068	0.275347
1085	0.307469	0.296257
1092	0.303825	0.292904
1099	0.304547	0.303874
1106	0.311016	0.280963
1113	0.300977	0.286084
1120	0.32177	0.29482
1127	0.316894	0.288682
1134	0.283985	0.288833
1141	0.349798	0.270375
1148	0.303949	0.284718
1155	0.294957	0.264594
1162	0.309457	0.275184
1169	0.34062	0.29436
1176	0.291637	0.26812
1183	0.314984	0.304122
1190	0.321075	0.2917
1197	0.327619	0.261141
1204	0.340274	0.303985
1211	0.346348	0.286787
1218	0.312741	0.264388
1225	0.323269	0.262624
1232	0.34014	0.283114
1239	0.301495	0.272013
1246	0.293593	0.269684
1253	0.326065	0.25222
1260	0.284581	0.256716
1267	0.260913	0.270532
1274	0.211737	0.231744
1281	0.249952	0.230637
1288	0.211328	0.224123
1295	0.254704	0.231168
1302	0.222493	0.23006
1309	0.190305	0.225017
1316	0.213744	0.208715
1323	0.210932	0.220809
1330	0.201914	0.199471
1337	0.199608	0.217713
1344	0.192949	0.206323
1351	0.209547	0.184094
1358	0.163649	0.165175
1365	0.185412	0.157794
1372	0.197672	0.187144
1379	0.184012	0.187032
1386	0.178927	0.164397
1393	0.182415	0.181434
1400	0.197619	0.159758
1407	0.165492	0.167996
1414	0.195243	0.168929
1421	0.170979	0.148725
1428	0.180022	0.175318
1435	0.152601	0.160014
1442	0.191825	0.168534
1449	0.179992	0.151082
1456	0.176953	0.168511
1463	0.150686	0.160842
1470	0.186663	0.162782
1477	0.180729	0.155123
1484	0.175646	0.159715
1491	0.185182	0.159092
1498	0.179514	0.158639
1505	0.168469	0.154564
1512	0.182701	0.146781
1519	0.170535	0.150883
1526	0.165352	0.143106
1533	0.15514	0.165101
1540	0.157863	0.148464
1547	0.173615	0.127617
1554	0.204597	0.142387
1561	0.164475	0.125128
1568	0.151132	0.146689
1575	0.184441	0.152626
1582	0.162734	0.150694
1589	0.147944	0.151137
1596	0.172722	0.167358
1603	0.159909	0.13212
1610	0.167223	0.155716
1617	0.140019	0.168162
1624	0.139518	0.136722
1631	0.13827	0.14413
1638	0.164833	0.150932
1645	0.136843	0.138333
1652	0.113059	0.163139
1659	0.157657	0.158624
1666	0.15223	0.102912
1673	0.132602	0.150514
1680	0.132887	0.136737
1687	0.145899	0.144414
1694	0.121656	0.155921
1701	0.123226	0.145225
1708	0.135842	0.162965
1715	0.124336	0.137275
1722	0.1248	0.15164
1729	0.128845	0.147311
1736	0.104593	0.136911
1743	0.139284	0.171281
1750	0.139721	0.137768
1757	0.134685	0.138886
1764	0.117303	0.136149
1771	0.124759	0.155826
1778	0.142458	0.142157
1785	0.155655	0.127396
1792	0.153466	0.153288
1799	0.151055	0.160272
1806	0.121173	0.156055
1813	0.140899	0.13741
1820	0.141339	0.152005
1827	0.147899	0.165439
1834	0.147514	0.154416
1841	0.14668	0.154682
1848	0.138049	0.14569
1855	0.124086	0.155589
1862	0.152103	0.130398
1869	0.124814	0.15894
1876	0.140273	0.165897
1883	0.122376	0.167369
1890	0.136142	0.168667
1897	0.143844	0.152015
1904	0.148226	0.149223
1911	0.152981	0.162242
1918	0.139777	0.165442
1925	0.128429	0.171469
1932	0.113781	0.14913
1939	0.135588	0.154564
1946	0.132439	0.142932
1953	0.155424	0.167046
1960	0.132716	0.150377
1967	0.161745	0.164266
1974	0.122288	0.145675
1981	0.147844	0.134614
1988	0.121697	0.155365
1995	0.130167	0.139266
2002	0.126258	0.176513
2009	0.124353	0.163484
2016	0.139071	0.175558
2023	0.124483	0.158675
2030	0.135385	0.158817
2037	0.152917	0.163002
2044	0.16325	0.149521
2051	0.120487	0.177587
2058	0.153559	0.17508
2065	0.122372	0.166404
2072	0.131481	0.156083
2079	0.108193	0.148568
2086	0.129215	0.151297
2093	0.144498	0.155239
2100	0.144333	0.155281
2107	0.133045	0.142917
2114	0.13831	0.173294
2121	0.119571	0.149799
2128	0.126593	0.144971
2135	0.158104	0.181761
2142	0.144476	0.135721
2149	0.145555	0.153056
2156	0.141443	0.156465
2163	0.133519	0.162648
2170	0.135426	0.148968
2177	0.141322	0.154373
2184	0.103861	0.17979
2191	0.125015	0.171822
2198	0.142996	0.176289
2205	0.141129	0.133428
2212	0.157542	0.163193
2219	0.150007	0.16256
2226	0.142813	0.163546
2233	0.152824	0.157595
2240	0.146353	0.153143
2247	0.146099	0.141444
2254	0.151987	0.159149
2261	0.142085	0.164623
2268	0.132421	0.152838
2275	0.147103	0.158522
2282	0.122127	0.141549
2289	0.120814	0.146778
2296	0.13786	0.16173
2303	0.146269	0.160632
2310	0.179607	0.167457
2317	0.16852	0.181565
2324	0.127099	0.165022
2331	0.154883	0.154294
2338	0.115085	0.14722
2345	0.133915	0.145726
2352	0.160011	0.182989
2359	0.142202	0.170185
2366	0.164638	0.162511
2373	0.140955	0.170603
2380	0.149844	0.148095
2387	0.138503	0.157146
2394	0.157497	0.145695
2401	0.122743	0.145162
2408	0.140189	0.18862
2415	0.158643	0.153612
2422	0.117147	0.158754
2429	0.121781	0.19292
2436	0.135072	0.182606

## Sheet: graph
Figure4C
4mM KCl		20mM KCl		20mM KCl+NS1619
Vehicle	CNP	Vehicle	CNP	Vehicle	CNP
0.12217	0.136161	0.273994	0.367397	0.119552	0.123917
0.172602	0.130612	0.196025	0.312781	0.208396	0.171344
0.214748	0.12723	0.290105	0.242116	0.114547	0.206653
0.1941	0.151799	0.304881	0.431982	0.194152	0.190712
0.152904	0.0971951	0.365633	0.269955	0.201872	0.101722
0.248782	0.0807084	0.323577	0.156059	0.151932	0.0767465
0.181922	0.0631115	0.283204	0.153864	0.100495	0.0615315
0.142293	0.106456	0.368919	0.217118	0.132625	0.0928959
0.140242	0.0688492	0.258139	0.135263	0.168425	0.0598111
0.169334	0.0943757	0.285299	0.286145	0.106342	0.174243
0.14597	0.152879	0.243055	0.312967	0.16026	0.212267
0.125825	0.142952	0.259258	0.365638	0.0747518	0.148767
0.179712	0.0894502	0.367674	0.285609	0.11531	0.161145
0.132438	0.0828213	0.280609	0.190977	0.140242	0.090038
0.204403	0.161108	0.347594	0.316641	0.184733	0.18698
0.243285	0.0861591	0.362738	0.301683	0.154842	0.128673
0.256546	0.147418	0.302171	0.462914	0.0948288	0.197081
0.259316	0.138214	0.316127	0.250368	0.197988	0.16223
0.186865	0.163182	0.300834	0.316268	0.174327	0.239652
0.253628	0.13764	0.305579	0.274174	0.147743	0.209993
0.183485	0.0724763	0.235464	0.241439	0.223694	0.156312
0.10174	0.0687025	0.21241	0.199203	0.147918	0.127097
0.124023	0.133173	0.255613	0.32031	0.156439	0.24583
0.181853	0.110703	0.26148	0.260816	0.239397	0.256298
0.116293	0.12171	0.276585	0.205954	0.24922	0.20573
0.168224	0.0915753	0.268327	0.204191	0.137263	0.118243
0.0893142	0.104666	0.260688	0.192474	0.131794	0.184626
0.174428	0.0601468	0.31504	0.410949	0.212651	0.106028
0.117322	0.0869785	0.244734	0.224873	0.198236	0.16238
0.129138	0.0675694	0.299566	0.194773	0.124441	0.161763
