# Supplementary material for: C-type natriuretic peptide facilitates autonomic Ca2+ entry in growth plate chondrocytes for stimulating bone growth
Source: eLife. 2022 Mar 15;11:e71931. doi: 10.7554/eLife.71931 (PMC8923661; doi:10.7554/eLife.71931)
Supplement: Figure 5—source data 1. [file elife-71931-fig5-data1.xlsx]

## Sheet: trace
Figure 5A
CNP (300 nM) 10 mM FTY720
Times (s)	Cell1	Cell2	Cell3
0	0.211547	0.219219	0.165618
1	0.214564	0.220536	0.168409
2	0.213141	0.215544	0.16523
3	0.213913	0.218299	0.166131
4	0.211967	0.220673	0.168256
5	0.21118	0.224536	0.16894
6	0.211267	0.22349	0.165371
7	0.20864	0.229641	0.165178
8	0.203998	0.230668	0.164088
9	0.203786	0.227	0.163587
10	0.205309	0.222956	0.1667
11	0.205784	0.222701	0.170443
12	0.209778	0.218272	0.172757
13	0.216868	0.217002	0.172611
14	0.220178	0.220061	0.172246
15	0.220835	0.219631	0.170227
16	0.221076	0.222576	0.166457
17	0.224671	0.222624	0.166434
18	0.224686	0.220676	0.16482
19	0.220484	0.215714	0.167177
20	0.225313	0.21212	0.165751
21	0.228162	0.207015	0.168718
22	0.227398	0.20716	0.166805
23	0.227788	0.207294	0.169264
24	0.230527	0.210636	0.165841
25	0.226935	0.211644	0.163647
26	0.226737	0.209689	0.161263
27	0.223943	0.209121	0.161941
28	0.224629	0.207131	0.159782
29	0.223463	0.205716	0.157357
30	0.224125	0.204116	0.159102
31	0.220537	0.207227	0.157875
32	0.222252	0.207446	0.158718
33	0.222392	0.208849	0.160935
34	0.223504	0.209186	0.164361
35	0.222578	0.208985	0.166488
36	0.224084	0.207568	0.169988
37	0.220971	0.206163	0.16906
38	0.221952	0.202513	0.166168
39	0.221736	0.201267	0.164297
40	0.223698	0.200855	0.161434
41	0.224531	0.204815	0.159965
42	0.233581	0.202767	0.160442
43	0.233776	0.205055	0.161924
44	0.232807	0.204094	0.159835
45	0.231893	0.206994	0.160485
46	0.230764	0.203134	0.160591
47	0.226854	0.203637	0.160022
48	0.227986	0.204375	0.158766
49	0.230981	0.205517	0.16062
50	0.233229	0.205332	0.162208
51	0.240649	0.206735	0.159993
52	0.242265	0.207328	0.161832
53	0.242155	0.207565	0.161591
54	0.24324	0.208894	0.164682
55	0.246572	0.211224	0.162669
56	0.247363	0.212756	0.163225
57	0.247391	0.217025	0.160319
58	0.246355	0.220366	0.161396
59	0.24708	0.223738	0.160324
60	0.244765	0.225031	0.162468
61	0.237175	0.22433	0.164027
62	0.235712	0.222909	0.166026
63	0.239587	0.221839	0.166829
64	0.240355	0.220365	0.169025
65	0.246309	0.21915	0.17018
66	0.253678	0.219427	0.171721
67	0.250228	0.221011	0.173483
68	0.252674	0.221838	0.17422
69	0.25013	0.223294	0.172761
70	0.247151	0.221803	0.175595
71	0.241286	0.22109	0.177207
72	0.250946	0.222036	0.176164
73	0.250379	0.221662	0.178069
74	0.251574	0.217755	0.184804
75	0.255526	0.217945	0.18456
76	0.260695	0.221228	0.18819
77	0.257606	0.217929	0.191596
78	0.259404	0.218795	0.192645
79	0.268228	0.220387	0.189392
80	0.268447	0.224301	0.190288
81	0.269198	0.222016	0.188129
82	0.27184	0.225744	0.190193
83	0.271814	0.225992	0.193508
84	0.271355	0.229289	0.196208
85	0.271204	0.226152	0.201772
86	0.269746	0.22777	0.207199
87	0.273293	0.226969	0.210498
88	0.276566	0.226413	0.215597
89	0.282415	0.229912	0.219305
90	0.28421	0.236779	0.216068
91	0.292121	0.239717	0.221415
92	0.296873	0.241096	0.229453
93	0.301175	0.244873	0.237288
94	0.303453	0.244026	0.244645
95	0.306835	0.24284	0.253166
96	0.313835	0.243129	0.256842
97	0.319221	0.246489	0.255922
98	0.318855	0.248357	0.257234
99	0.323337	0.244687	0.262288
100	0.335403	0.243895	0.27351
101	0.337938	0.243518	0.283852
102	0.33224	0.244051	0.296612
103	0.342484	0.242113	0.305
104	0.342601	0.248131	0.312187
105	0.333235	0.249203	0.307035
106	0.331011	0.252227	0.306849
107	0.333778	0.250724	0.304015
108	0.323174	0.249083	0.297905
109	0.315069	0.245456	0.295805
110	0.308816	0.2459	0.303535
111	0.299176	0.244972	0.298595
112	0.290464	0.244871	0.296835
113	0.281949	0.250013	0.302052
114	0.276314	0.250648	0.302718
115	0.272839	0.247593	0.302953
116	0.26545	0.246769	0.30787
117	0.264597	0.249881	0.308059
118	0.26357	0.247666	0.308722
119	0.255127	0.249237	0.305015
120	0.250955	0.254702	0.302409
121	0.249382	0.254292	0.296319
122	0.242116	0.251681	0.295075
123	0.236633	0.249935	0.28834
124	0.235555	0.251185	0.285254
125	0.233203	0.249912	0.275927
126	0.228529	0.251086	0.273716
127	0.225864	0.251045	0.266195
128	0.222949	0.254079	0.259723
129	0.22453	0.253278	0.253028
130	0.222009	0.249075	0.252492
131	0.223221	0.248634	0.249725
132	0.222709	0.245277	0.250705
133	0.221117	0.244982	0.251211
134	0.220457	0.246811	0.252935
135	0.220311	0.249122	0.251168
136	0.216156	0.248985	0.251343
137	0.214277	0.254563	0.248926
138	0.2151	0.251568	0.249115
139	0.209382	0.249326	0.245643
140	0.20834	0.246915	0.242913
141	0.212065	0.24649	0.238791
142	0.213804	0.246563	0.239025
143	0.214299	0.251448	0.234494
144	0.220393	0.252186	0.233488
145	0.223435	0.253846	0.231602
146	0.221424	0.253354	0.229628
147	0.222393	0.254481	0.223528
148	0.225434	0.251885	0.223649
149	0.221597	0.253402	0.219559
150	0.216275	0.256288	0.216716
151	0.217344	0.257045	0.212617
152	0.21735	0.257347	0.208769
153	0.213072	0.263443	0.203123
154	0.215506	0.26515	0.201124
155	0.218488	0.265636	0.198151
156	0.215735	0.269352	0.198649
157	0.215254	0.270587	0.20065
158	0.213751	0.268006	0.200109
159	0.21274	0.265987	0.199378
160	0.212866	0.269361	0.202436
161	0.216389	0.269203	0.20214
162	0.214965	0.267324	0.202674
163	0.219267	0.2688	0.203152
164	0.217875	0.270018	0.202664
165	0.221682	0.276883	0.199386
166	0.225064	0.283371	0.196187
167	0.226949	0.290572	0.195462
168	0.225473	0.294037	0.193924
169	0.229306	0.298339	0.193366
170	0.229528	0.296551	0.192935
171	0.226315	0.297502	0.195403
172	0.226034	0.297416	0.196393
173	0.224112	0.299067	0.196375
174	0.222213	0.30709	0.195739
175	0.217006	0.311556	0.194369
176	0.21925	0.317394	0.192796
177	0.218303	0.318676	0.188172
178	0.221939	0.323278	0.18927
179	0.2229	0.322575	0.190269
180	0.224458	0.32167	0.191621
181	0.220431	0.314643	0.190831
182	0.221671	0.315828	0.192095
183	0.219954	0.309233	0.189139
184	0.217377	0.303549	0.18537
185	0.218304	0.2973	0.18412
186	0.218864	0.294495	0.181102
187	0.217412	0.286675	0.178913
188	0.222712	0.285454	0.177869
189	0.222921	0.279599	0.179533
190	0.218444	0.274892	0.178448
191	0.220236	0.273109	0.177806
192	0.221168	0.270243	0.178306
193	0.213992	0.265123	0.178871
194	0.217543	0.263729	0.179448
195	0.217635	0.259399	0.181222
196	0.218151	0.251726	0.185211
197	0.216363	0.25089	0.183394
198	0.216476	0.248712	0.185486
199	0.212868	0.243735	0.187569
200	0.215389	0.241818	0.185639
201	0.210213	0.240913	0.184351
202	0.209892	0.238122	0.186492
203	0.209211	0.231577	0.184559
204	0.207198	0.228821	0.181309
205	0.201391	0.230001	0.179361
206	0.204703	0.227511	0.176654
207	0.204406	0.223347	0.178471
208	0.205243	0.2287	0.177551
209	0.209156	0.229519	0.177211
210	0.211181	0.225916	0.178135
211	0.209151	0.224788	0.179894
212	0.209309	0.224953	0.177226
213	0.208928	0.221112	0.179089
214	0.205618	0.219667	0.177739
215	0.208873	0.218563	0.178753
216	0.210817	0.217721	0.179076
217	0.207092	0.216858	0.17976
218	0.21087	0.21489	0.176456
219	0.21307	0.212311	0.177752
220	0.214922	0.21239	0.176954
221	0.214578	0.214961	0.175796
222	0.220134	0.21482	0.175701
223	0.218527	0.216071	0.177451
224	0.220233	0.218497	0.177156
225	0.218964	0.218358	0.179211
226	0.221214	0.217348	0.180443
227	0.219065	0.21695	0.180346
228	0.21827	0.214735	0.183507
229	0.223265	0.215688	0.185254
230	0.229006	0.21406	0.185348
231	0.228201	0.214668	0.184982
232	0.233721	0.214432	0.182972
233	0.233364	0.214713	0.180911
234	0.231769	0.21161	0.17883
235	0.232648	0.212805	0.177384
236	0.233918	0.210328	0.178852
237	0.23622	0.213832	0.180825
238	0.240255	0.21288	0.178681
239	0.24058	0.216562	0.181856
240	0.237456	0.216056	0.182114
241	0.240146	0.216282	0.179544
242	0.232508	0.215595	0.179216
243	0.230655	0.217972	0.180628
244	0.229619	0.21474	0.177836
245	0.230524	0.21425	0.176621
246	0.23183	0.214578	0.177668
247	0.239023	0.209806	0.175686
248	0.245365	0.206749	0.176359
249	0.243853	0.204447	0.177872
250	0.24663	0.204449	0.181053
251	0.243074	0.206097	0.182039
252	0.242947	0.2115	0.184334
253	0.237248	0.212142	0.184608
254	0.235206	0.213844	0.184292
255	0.236183	0.21414	0.185158
256	0.238658	0.212497	0.186194
257	0.238481	0.207697	0.188173
258	0.241406	0.205896	0.192075
259	0.247694	0.211619	0.195498
260	0.243584	0.211629	0.195096
261	0.243725	0.209323	0.19419
262	0.243051	0.212111	0.193853
263	0.245963	0.214681	0.190245
264	0.242911	0.211673	0.191033
265	0.244882	0.210532	0.191288
266	0.246084	0.211511	0.191429
267	0.250335	0.214102	0.191085
268	0.253598	0.212173	0.193347
269	0.257908	0.210553	0.189226
270	0.258787	0.212205	0.186736
271	0.259859	0.211158	0.185278
272	0.259093	0.20372	0.185501
273	0.26092	0.205677	0.182081
274	0.264433	0.203352	0.185397
275	0.264768	0.201616	0.189952
276	0.269018	0.204058	0.19099
277	0.269818	0.20484	0.190592
278	0.271617	0.2062	0.191563
279	0.27436	0.206777	0.19252
280	0.27572	0.207191	0.188054
281	0.277519	0.206389	0.189388
282	0.282441	0.208724	0.19147
283	0.278209	0.20643	0.193323
284	0.275348	0.208698	0.195207
285	0.281428	0.208303	0.197936
286	0.284158	0.208333	0.198161
287	0.284967	0.20628	0.194431
288	0.291845	0.205952	0.195007
289	0.297677	0.204133	0.188005
290	0.301382	0.201117	0.187334
291	0.304857	0.199678	0.18612
292	0.308347	0.198966	0.18669
293	0.31097	0.201655	0.184416
294	0.316995	0.201773	0.18872
295	0.318314	0.204583	0.186388
296	0.321057	0.203848	0.183915
297	0.318173	0.207601	0.183675
298	0.318352	0.207677	0.183632
299	0.318085	0.208279	0.180604
300	0.320706	0.208719	0.181242
301	0.315417	0.210053	0.183982
302	0.320676	0.208428	0.183476
303	0.317859	0.20759	0.180619
304	0.317113	0.207446	0.178007
305	0.309819	0.209004	0.174355
306	0.305204	0.209525	0.172274
307	0.302466	0.209584	0.168948
308	0.301891	0.209171	0.170691
309	0.287487	0.208275	0.173998
310	0.28335	0.208092	0.175578
311	0.278627	0.208356	0.173375
312	0.268323	0.208216	0.176674
313	0.25508	0.206479	0.175079
314	0.246816	0.209431	0.171488
315	0.241072	0.211931	0.169565
316	0.237852	0.212138	0.17002
317	0.229972	0.211671	0.168168
318	0.227247	0.212176	0.17031
319	0.22643	0.212846	0.170824
320	0.222777	0.212284	0.171157
321	0.218313	0.214352	0.172152
322	0.216847	0.215684	0.172065
323	0.216237	0.218785	0.171072
324	0.214757	0.219012	0.172059
325	0.208046	0.22013	0.176352
326	0.205716	0.217672	0.174904
327	0.202957	0.220043	0.177678
328	0.196204	0.221206	0.177827
329	0.195434	0.221177	0.176288
330	0.19467	0.218981	0.173814
331	0.193803	0.220281	0.17573
332	0.196177	0.219677	0.172789
333	0.198041	0.217728	0.174394
334	0.1958	0.216196	0.177354
335	0.197899	0.215289	0.177834
336	0.195566	0.2165	0.177171
337	0.191583	0.216465	0.1789
338	0.192452	0.219063	0.177222
339	0.191102	0.218928	0.176895
340	0.190891	0.220093	0.178124
341	0.185813	0.220858	0.17829
342	0.185615	0.218238	0.178781
343	0.182725	0.212589	0.178681
344	0.182638	0.214418	0.176928
345	0.183485	0.215481	0.175373
346	0.186253	0.212391	0.175753
347	0.186965	0.216247	0.172985
348	0.189183	0.218638	0.171772
349	0.188906	0.217435	0.17084
350	0.187886	0.214361	0.170168
351	0.189111	0.212249	0.168354
352	0.188222	0.210235	0.170489
353	0.187912	0.212225	0.170071
354	0.186106	0.212545	0.168802
355	0.184925	0.214464	0.1691
356	0.184148	0.217201	0.171355
357	0.184367	0.220616	0.169914
358	0.185231	0.21834	0.169446
359	0.185208	0.222141	0.172041
360	0.185604	0.222283	0.17251
361	0.187262	0.225783	0.169554
362	0.187272	0.223428	0.170494
363	0.188748	0.227022	0.171611
364	0.191048	0.227186	0.171015
365	0.189639	0.232255	0.172944
366	0.190112	0.233311	0.176688
367	0.188742	0.234063	0.176711
368	0.186621	0.235607	0.178984
369	0.187187	0.234425	0.179438
370	0.187943	0.231217	0.179076
371	0.186616	0.233931	0.181368
372	0.187662	0.236146	0.182649
373	0.185891	0.236594	0.183424
374	0.184367	0.237165	0.185176
375	0.184572	0.239425	0.187425
376	0.184403	0.234902	0.185449
377	0.183866	0.23436	0.185672
378	0.182811	0.235888	0.184219
379	0.186018	0.238504	0.185123
380	0.185247	0.237211	0.182355
381	0.187107	0.242553	0.183859
382	0.186852	0.244567	0.187031
383	0.186586	0.242057	0.189575
384	0.186612	0.243664	0.191156
385	0.186117	0.247222	0.194902
386	0.183046	0.246871	0.195807
387	0.184526	0.245003	0.19654
388	0.185101	0.24546	0.197819
389	0.183521	0.241519	0.198594
390	0.182203	0.239445	0.199209
391	0.182452	0.234922	0.202943
392	0.180359	0.237138	0.203873
393	0.181355	0.236068	0.204281
394	0.181067	0.235929	0.20762
395	0.182653	0.235561	0.207954
396	0.185431	0.236912	0.207885
397	0.186226	0.234115	0.213908
398	0.183949	0.23278	0.218918
399	0.183237	0.230862	0.220097
400	0.183563	0.231956	0.224007
401	0.186025	0.232558	0.223924
402	0.183795	0.234873	0.219765
403	0.184269	0.235853	0.218241
404	0.183512	0.240217	0.216456
405	0.180849	0.239769	0.212724
406	0.176674	0.239277	0.215197
407	0.183052	0.237622	0.215992
408	0.183424	0.240855	0.212159
409	0.186881	0.240234	0.211889
410	0.188637	0.242677	0.2137
411	0.186674	0.244045	0.211324
412	0.182655	0.246874	0.211937
413	0.183673	0.24618	0.215603
414	0.178816	0.246014	0.217383
415	0.18036	0.243552	0.217974
416	0.184422	0.244443	0.220137
417	0.186096	0.240827	0.221142
418	0.187617	0.239801	0.219815
419	0.192899	0.237769	0.218414
420	0.19089	0.239158	0.216004
421	0.189706	0.241053	0.212613
422	0.193647	0.244674	0.207205
423	0.195207	0.247948	0.20068
424	0.193584	0.248227	0.199409
425	0.197113	0.249223	0.19613
426	0.198361	0.246148	0.193178
427	0.197254	0.246669	0.192305
428	0.197479	0.243889	0.193944
429	0.19958	0.248884	0.192245
430	0.199109	0.247653	0.196718
431	0.198663	0.246196	0.196609
432	0.1966	0.247043	0.198279
433	0.198181	0.247558	0.200399
434	0.202085	0.243104	0.202206
435	0.202522	0.241775	0.199966
436	0.205874	0.245302	0.201024
437	0.207639	0.24422	0.199956
438	0.207655	0.24935	0.200546
439	0.202377	0.251749	0.196999
440	0.204259	0.253578	0.194399
441	0.198791	0.258405	0.193639
442	0.203355	0.258267	0.192337
443	0.20437	0.259314	0.190794
444	0.208513	0.264478	0.190556
445	0.211001	0.268802	0.189375
446	0.215227	0.267932	0.18681
447	0.211091	0.275045	0.183956
448	0.211563	0.28213	0.180349
449	0.207695	0.286779	0.181388
450	0.209343	0.29169	0.18218
451	0.208729	0.295777	0.182573
452	0.211472	0.297012	0.18479
453	0.210975	0.291661	0.187915
454	0.211845	0.289501	0.18493
455	0.210109	0.288445	0.181981
456	0.210403	0.289327	0.180402
457	0.209177	0.29319	0.178521
458	0.211784	0.298111	0.174698
459	0.216452	0.302805	0.173696
460	0.215375	0.3048	0.173779
461	0.216199	0.312824	0.173333
462	0.218438	0.312969	0.173264
463	0.215843	0.314006	0.174435
464	0.216583	0.311276	0.175016
465	0.221264	0.311093	0.174566
466	0.224196	0.303542	0.176799
467	0.22375	0.297239	0.176284
468	0.228589	0.295715	0.175459
469	0.227203	0.29723	0.177341
470	0.229826	0.300037	0.1788
471	0.226526	0.293496	0.178527
472	0.226558	0.294912	0.178295
473	0.224854	0.290258	0.18139
474	0.22459	0.28433	0.178917
475	0.221531	0.275643	0.179736
476	0.227321	0.27661	0.177391
477	0.226774	0.276594	0.177384
478	0.223966	0.27286	0.173965
479	0.224559	0.270653	0.174216
480	0.224316	0.269364	0.173163
481	0.231809	0.265716	0.172799
482	0.235008	0.257301	0.171215
483	0.235044	0.256386	0.168819
484	0.23484	0.253117	0.16702
485	0.239067	0.250609	0.16552
486	0.230409	0.24719	0.166779
487	0.229795	0.248241	0.166579
488	0.235971	0.245931	0.168906
489	0.240565	0.243859	0.170862
490	0.235943	0.242843	0.17198
491	0.237585	0.242713	0.170135
492	0.239434	0.243999	0.173208
493	0.236165	0.243986	0.172943
494	0.235676	0.246593	0.171735
495	0.235958	0.245722	0.168751
496	0.236714	0.249516	0.1682
497	0.236261	0.246319	0.16652
498	0.239613	0.250679	0.167126
499	0.236973	0.251949	0.165301
500	0.236319	0.253286	0.166034
501	0.238144	0.252818	0.168122
502	0.242983	0.253859	0.167196
503	0.243489	0.248628	0.165572
504	0.251264	0.246027	0.168047
505	0.25734	0.242969	0.169559
506	0.258765	0.243724	0.165604
507	0.258709	0.245112	0.16486
508	0.256813	0.24759	0.162778
509	0.259555	0.248191	0.161794
510	0.262626	0.25062	0.162663
511	0.26597	0.246609	0.164595
512	0.267682	0.247782	0.164532
513	0.271014	0.247552	0.165856
514	0.270629	0.247244	0.165106
515	0.27216	0.245758	0.164607
516	0.273907	0.248144	0.164989
517	0.276552	0.243918	0.164364
518	0.281927	0.2411	0.165842
519	0.284192	0.243535	0.163467
520	0.288772	0.245703	0.160367
521	0.29449	0.249398	0.158106
522	0.299044	0.249243	0.158354
523	0.305186	0.24822	0.157996
524	0.30847	0.246136	0.161053
525	0.316217	0.243841	0.163632
526	0.317703	0.240334	0.164021
527	0.324984	0.241678	0.16297
528	0.32663	0.246484	0.161218
529	0.338053	0.24426	0.160107
530	0.337519	0.246362	0.157961
531	0.340531	0.244784	0.158991
532	0.338493	0.24547	0.160871
533	0.341452	0.24153	0.162547
534	0.338047	0.243696	0.161937
535	0.336914	0.240906	0.163829
536	0.342648	0.240985	0.163105
537	0.338531	0.237762	0.16327
538	0.334012	0.24134	0.164248
539	0.329844	0.236486	0.1666
540	0.321926	0.233479	0.166893
541	0.307474	0.230797	0.167143
542	0.297797	0.231586	0.166207
543	0.290563	0.225138	0.163201
544	0.2734	0.226578	0.160085
545	0.262568	0.226394	0.159347
546	0.248472	0.228876	0.159634
547	0.242399	0.229029	0.160291
548	0.234882	0.230006	0.159821
549	0.231822	0.232229	0.15764
550	0.229782	0.233601	0.156399
551	0.229441	0.230576	0.158176
552	0.230251	0.228205	0.157175
553	0.223636	0.227461	0.160879
554	0.21941	0.224531	0.163855
555	0.215999	0.226268	0.165002
556	0.211462	0.229255	0.164253
557	0.205192	0.230695	0.164763
558	0.205721	0.231039	0.163342
559	0.204729	0.229844	0.162529
560	0.204657	0.226485	0.162387
561	0.205149	0.224595	0.161519
562	0.203572	0.223917	0.162689
563	0.200151	0.225584	0.163392
564	0.198641	0.225598	0.164719
565	0.196086	0.227282	0.164058
566	0.195883	0.226182	0.16568
567	0.197326	0.225869	0.164194
568	0.199038	0.223408	0.16561
569	0.198451	0.222944	0.168898
570	0.196324	0.221431	0.173504
571	0.195922	0.221589	0.176337
572	0.195791	0.221109	0.18149
573	0.195045	0.220109	0.185512
574	0.199048	0.22478	0.188902
575	0.200331	0.22638	0.191735
576	0.197789	0.228276	0.197246
577	0.193339	0.228772	0.197087
578	0.193288	0.229466	0.197907
579	0.190073	0.225035	0.19622
580	0.188414	0.226609	0.194623
581	0.191024	0.226036	0.191265
582	0.193549	0.226175	0.192732
583	0.193546	0.222478	0.192792
584	0.193874	0.222901	0.194763
585	0.201083	0.219495	0.196512
586	0.200273	0.218096	0.195458
587	0.199612	0.218099	0.195333
588	0.199112	0.222934	0.194372
589	0.200485	0.22189	0.190129
590	0.193552	0.22	0.189892
591	0.194246	0.218911	0.189957
592	0.196382	0.218741	0.187448
593	0.197202	0.218422	0.187919
594	0.200075	0.22041	0.189006
595	0.200976	0.225406	0.188187
596	0.20241	0.228236	0.18745
597	0.197912	0.226601	0.188621
598	0.20048	0.226755	0.186419
599	0.195703	0.229166	0.187053
600	0.1941	0.226387	0.187052
601	0.195141	0.227149	0.187876
602	0.195781	0.23063	0.187106
603	0.191854	0.230761	0.186742
604	0.194388	0.229675	0.187094
605	0.198301	0.234571	0.188164
606	0.19765	0.232064	0.188514
607	0.20273	0.231715	0.194502
608	0.206788	0.233514	0.196317
609	0.20557	0.232812	0.199004
610	0.202771	0.230796	0.200356
611	0.199069	0.229755	0.20057
612	0.196095	0.229201	0.197061
613	0.19519	0.23044	0.199767
614	0.194805	0.230453	0.198892
615	0.19667	0.228311	0.200194
616	0.19797	0.232409	0.199715
617	0.199752	0.234069	0.202181
618	0.197387	0.23621	0.201706
619	0.201161	0.23681	0.205281
620	0.20482	0.239881	0.206242
621	0.209747	0.241241	0.208538
622	0.207368	0.240119	0.209825
623	0.210205	0.237381	0.213948
624	0.208045	0.24135	0.215851
625	0.203591	0.240105	0.215504
626	0.203367	0.241115	0.220514
627	0.206314	0.241864	0.21987
628	0.20386	0.243467	0.22045
629	0.203061	0.24038	0.220283
630	0.204239	0.240424	0.223491
631	0.204631	0.235702	0.220266
632	0.207183	0.2384	0.222352
633	0.212987	0.235307	0.217618
634	0.217067	0.237161	0.212682
635	0.220482	0.237792	0.207328
636	0.220358	0.239735	0.205017
637	0.219733	0.238513	0.204004
638	0.220562	0.239771	0.20403
639	0.225335	0.238475	0.210368
640	0.223683	0.241219	0.213932
641	0.224647	0.244191	0.217546
642	0.228551	0.244507	0.220505
643	0.230935	0.247805	0.22357
644	0.228904	0.248917	0.225881
645	0.232117	0.247995	0.228573
646	0.235263	0.248808	0.232737
647	0.231982	0.248847	0.237863
648	0.22958	0.247513	0.241823
649	0.226892	0.248884	0.245206
650	0.227998	0.251977	0.249831
651	0.230145	0.247793	0.25131
652	0.235463	0.248065	0.253267
653	0.24037	0.249862	0.256454
654	0.241683	0.252409	0.256957
655	0.243307	0.253805	0.253946
656	0.242387	0.25292	0.255965
657	0.238343	0.25447	0.250937
658	0.23644	0.253604	0.248266
659	0.244831	0.251271	0.241325
660	0.245177	0.24999	0.240612
661	0.246543	0.254849	0.23593
662	0.250847	0.254404	0.237715
663	0.250975	0.25927	0.239235
664	0.250534	0.259536	0.245082
665	0.257023	0.259941	0.246027
666	0.262077	0.256972	0.247721
667	0.26407	0.262253	0.245213
668	0.267612	0.256779	0.245944
669	0.263037	0.257552	0.244605
670	0.253858	0.256786	0.246281
671	0.251028	0.263074	0.246564
672	0.250303	0.258981	0.245503
673	0.244578	0.257525	0.243608
674	0.251734	0.254061	0.242061
675	0.257246	0.251525	0.240291
676	0.254269	0.249402	0.240791
677	0.25831	0.249259	0.246075
678	0.265208	0.250295	0.249715
679	0.262712	0.249413	0.254287
680	0.26218	0.249934	0.256574
681	0.267155	0.246804	0.256022
682	0.267194	0.246101	0.253528
683	0.262714	0.245406	0.249335
684	0.259438	0.247009	0.249896
685	0.262778	0.245035	0.247523
686	0.258632	0.241998	0.248766
687	0.250973	0.235775	0.246747
688	0.25191	0.232806	0.246684
689	0.252055	0.229451	0.24036
690	0.25013	0.225982	0.239091
691	0.250558	0.22571	0.240604
692	0.252391	0.226192	0.241195
693	0.254737	0.224987	0.240301
694	0.252524	0.222358	0.239116
695	0.251577	0.224738	0.239753
696	0.2501	0.2245	0.236303
697	0.255678	0.223283	0.235976
698	0.25211	0.221174	0.234862
699	0.257091	0.222032	0.233806
700	0.258171	0.222157	0.229074
701	0.254399	0.220157	0.222525
702	0.254348	0.221197	0.217454
703	0.256817	0.221801	0.215214
704	0.252278	0.220564	0.210802
705	0.250696	0.217963	0.208418
706	0.257522	0.218109	0.211067
707	0.256943	0.217	0.210036
708	0.256343	0.217742	0.209069
709	0.264871	0.218492	0.209985
710	0.269872	0.216205	0.21073
711	0.268196	0.212349	0.20421
712	0.266456	0.208435	0.202683
713	0.270751	0.206457	0.201369
714	0.263825	0.205905	0.198628
715	0.256989	0.203994	0.197029
716	0.262695	0.20395	0.197986
717	0.260963	0.204519	0.195418
718	0.263205	0.20758	0.193045
719	0.265784	0.207921	0.193992
720	0.273975	0.209856	0.191184
721	0.275043	0.212351	0.192427
722	0.280517	0.213822	0.192135
723	0.27826	0.210686	0.189603
724	0.284065	0.208311	0.188468
725	0.284357	0.206884	0.18733
726	0.287146	0.205934	0.183928
727	0.28887	0.206865	0.184842
728	0.289751	0.206641	0.187538
729	0.293473	0.205159	0.186882
730	0.295775	0.206053	0.188414
731	0.294955	0.206538	0.189997
732	0.298397	0.206927	0.187921
733	0.301557	0.204914	0.18502
734	0.299108	0.203595	0.187941
735	0.298111	0.201431	0.186917
736	0.296994	0.200031	0.18576
737	0.291248	0.198851	0.18824
738	0.28532	0.197959	0.18769
739	0.284369	0.200539	0.184281
740	0.279807	0.199556	0.1831
741	0.276475	0.197445	0.182934
742	0.276405	0.196599	0.179026
743	0.273918	0.199534	0.18018
744	0.268644	0.196433	0.179981
745	0.261214	0.197558	0.180241
746	0.258936	0.198812	0.179146
747	0.255151	0.19638	0.178915
748	0.253474	0.193167	0.176741
749	0.253747	0.193067	0.175329
750	0.253681	0.192911	0.173204
751	0.251588	0.191852	0.171418
752	0.250754	0.190934	0.171558
753	0.248402	0.19024	0.171555
754	0.244481	0.190807	0.171498
755	0.243847	0.191735	0.172887
756	0.242942	0.192431	0.173368
757	0.2394	0.192921	0.174187
758	0.241536	0.195219	0.174821
759	0.239967	0.198354	0.17167
760	0.240034	0.195123	0.171242
761	0.239561	0.194393	0.171719
762	0.242374	0.192063	0.171278
763	0.239438	0.187721	0.170729
764	0.238753	0.184091	0.172365
765	0.241835	0.183281	0.173676
766	0.240568	0.183628	0.177001
767	0.242547	0.181467	0.178079
768	0.246526	0.183808	0.180756
769	0.248373	0.184359	0.185302
770	0.2468	0.186955	0.18637
771	0.248709	0.18341	0.185546
772	0.244582	0.185684	0.187047
773	0.240705	0.184795	0.185516
774	0.237106	0.183172	0.18343
775	0.23843	0.182226	0.17895
776	0.237902	0.185878	0.178321
777	0.239181	0.186889	0.177655
778	0.242795	0.188201	0.175887
779	0.245575	0.189646	0.179456
780	0.244378	0.19038	0.180206
781	0.243104	0.187573	0.181318
782	0.245508	0.185318	0.179795
783	0.246718	0.184766	0.179763
784	0.246728	0.185193	0.175702
785	0.251225	0.183776	0.178291
786	0.253756	0.185324	0.1748
787	0.254962	0.185834	0.174257
788	0.257964	0.184355	0.174004
789	0.26161	0.185962	0.172844
790	0.262903	0.186943	0.170164
791	0.261263	0.186835	0.171387
792	0.26185	0.189008	0.170447
793	0.255012	0.189932	0.170956
794	0.253841	0.187031	0.168635
795	0.249818	0.18707	0.169406
796	0.252833	0.184651	0.168455
797	0.254245	0.18298	0.169104
798	0.261526	0.182692	0.167787
799	0.267282	0.181821	0.167127
800	0.275067	0.18219	0.167684
801	0.281374	0.189074	0.167332
802	0.285963	0.190181	0.166775
803	0.292983	0.189941	0.167043
804	0.296231	0.190532	0.168359
805	0.295573	0.187551	0.165507
806	0.296197	0.181658	0.165525
807	0.300359	0.180553	0.164296
808	0.297871	0.179405	0.164113
809	0.300934	0.177074	0.165378
810	0.308895	0.176352	0.166451
811	0.313466	0.1789	0.164948
812	0.314705	0.180243	0.165749
813	0.318359	0.179617	0.163083
814	0.318594	0.179635	0.159633
815	0.321161	0.183272	0.159053
816	0.321785	0.181373	0.160069
817	0.319873	0.179586	0.158681
818	0.318287	0.180316	0.159454
819	0.313701	0.182747	0.159981
820	0.307065	0.179832	0.159424
821	0.304888	0.179856	0.158359
822	0.297999	0.181357	0.158372
823	0.294895	0.181798	0.160405
824	0.291452	0.179572	0.162583
825	0.284361	0.17942	0.163108
826	0.276244	0.177869	0.163888
827	0.276603	0.175692	0.166483
828	0.26713	0.174022	0.165278
829	0.256506	0.175473	0.162741
830	0.248931	0.177189	0.162554
831	0.244599	0.177774	0.160869
832	0.235195	0.177413	0.15754
833	0.231927	0.178329	0.155587
834	0.238169	0.177772	0.155989
835	0.23432	0.174932	0.155725
836	0.231358	0.17419	0.159611
837	0.228924	0.173537	0.162632
838	0.227702	0.172974	0.163307
839	0.219693	0.173763	0.16481
840	0.217007	0.176052	0.16353
841	0.209821	0.17604	0.163173
842	0.204297	0.176357	0.160322
843	0.198399	0.174461	0.158635
844	0.193577	0.174579	0.158879
845	0.192856	0.17283	0.16082
846	0.193621	0.1713	0.156777
847	0.192815	0.169316	0.155648
848	0.193646	0.169071	0.157819
849	0.194452	0.165825	0.157188
850	0.196659	0.163427	0.154553
851	0.195097	0.167336	0.154562
852	0.194893	0.172556	0.154583
853	0.195397	0.173744	0.153517
854	0.192564	0.175027	0.151483
855	0.190676	0.177705	0.152312
856	0.18923	0.174639	0.152477
857	0.188911	0.17097	0.153587
858	0.193881	0.172098	0.154585
859	0.199919	0.16944	0.155648
860	0.198982	0.169447	0.154819
861	0.203453	0.170859	0.152641
862	0.205451	0.170543	0.153546
863	0.203714	0.167041	0.150674
864	0.201809	0.170017	0.150475
865	0.202667	0.169352	0.152476
866	0.198786	0.168633	0.15614
867	0.196727	0.17072	0.15406
868	0.191768	0.170199	0.159229
869	0.191391	0.170121	0.158279
870	0.194231	0.169942	0.158365
871	0.196779	0.166155	0.15763
872	0.200324	0.164866	0.159515
873	0.202442	0.166182	0.157861
874	0.201773	0.163807	0.158917
875	0.199654	0.163834	0.159389
876	0.197319	0.169243	0.158449
877	0.193266	0.167988	0.158508
878	0.192247	0.169848	0.157769
879	0.191673	0.171284	0.157344
880	0.191116	0.169626	0.156339
881	0.189919	0.164959	0.155966
882	0.189119	0.164434	0.157014
883	0.186826	0.164055	0.155746
884	0.184292	0.164802	0.15636
885	0.187439	0.164838	0.156367
886	0.189839	0.164855	0.159501
887	0.190599	0.165236	0.156598
888	0.190749	0.165039	0.159388
889	0.192182	0.164177	0.158993
890	0.187705	0.164267	0.156986
891	0.186488	0.166048	0.153952
892	0.18478	0.16611	0.156013
893	0.185057	0.164779	0.156259
894	0.186038	0.16261	0.156344
895	0.183302	0.164888	0.158799
896	0.18293	0.161581	0.158896
897	0.184224	0.159372	0.158318
898	0.18348	0.161202	0.156815
899	0.178466	0.164166	0.157023
900	0.179118	0.162588	0.154735
901	0.181709	0.164199	0.15377
902	0.178482	0.166533	0.153907
903	0.17867	0.162693	0.15272
904	0.178087	0.160422	0.154704
905	0.175255	0.158056	0.156662
906	0.172619	0.158185	0.158063
907	0.178322	0.158262	0.158666
908	0.175995	0.160006	0.160004
909	0.181274	0.161571	0.157426
910	0.18649	0.16283	0.156666
911	0.185649	0.161948	0.158257
912	0.183248	0.160629	0.157245
913	0.185952	0.161823	0.156249
914	0.185241	0.162855	0.154576
915	0.183756	0.162241	0.155539
916	0.184257	0.163484	0.152582
917	0.185692	0.164694	0.152444
918	0.186268	0.165237	0.153147
919	0.186616	0.163945	0.153882
920	0.187228	0.165855	0.152375
921	0.184895	0.167462	0.152554
922	0.181987	0.165742	0.151195
923	0.180153	0.163111	0.150968
924	0.18039	0.162251	0.153759
925	0.180573	0.16133	0.153889
926	0.181404	0.158072	0.155112
927	0.183852	0.159795	0.155145
928	0.1822	0.159345	0.155209
929	0.179372	0.158286	0.153545
930	0.178783	0.158353	0.155511
931	0.176859	0.158831	0.155038
932	0.176017	0.156505	0.157357
933	0.177701	0.160004	0.157173
934	0.175587	0.162666	0.156601
935	0.17454	0.163102	0.155567
936	0.174742	0.164284	0.154024
937	0.173715	0.167216	0.151836
938	0.172072	0.164748	0.152813
939	0.173357	0.165006	0.154373
940	0.174259	0.166078	0.153136
941	0.176894	0.165399	0.15528
942	0.178906	0.162315	0.155938
943	0.182409	0.163562	0.155092
944	0.182597	0.162089	0.153683
945	0.181536	0.15929	0.154484
946	0.180099	0.15903	0.155256
947	0.178212	0.162454	0.158697
948	0.176687	0.163542	0.160285
949	0.178825	0.162538	0.161057
950	0.179996	0.164594	0.161476
951	0.180441	0.16733	0.160872
952	0.18134	0.164753	0.15786
953	0.179985	0.164258	0.155203
954	0.179662	0.16472	0.154964
955	0.181487	0.164516	0.155122
956	0.182654	0.160901	0.15356
957	0.182228	0.160732	0.151849
958	0.182169	0.159031	0.151588
959	0.181889	0.160481	0.152165
960	0.180047	0.159247	0.154651
961	0.181015	0.160171	0.156915
962	0.18212	0.162528	0.159278
963	0.18471	0.163163	0.160292
964	0.185721	0.16133	0.161537
965	0.185358	0.161674	0.159478
966	0.183965	0.160947	0.160451
967	0.182131	0.158571	0.161765
968	0.181479	0.157177	0.162337
969	0.18044	0.157799	0.15992
970	0.18211	0.157631	0.160486
971	0.184043	0.158823	0.16025
972	0.187124	0.160953	0.16043
973	0.187861	0.160658	0.161834
974	0.187649	0.160792	0.163252
975	0.185003	0.160231	0.163626
976	0.183183	0.161079	0.161484
977	0.180679	0.159238	0.159881
978	0.182685	0.159474	0.157596
979	0.185666	0.158442	0.156198
980	0.186665	0.15991	0.15642
981	0.185705	0.157895	0.156816
982	0.186286	0.157921	0.157817
983	0.182569	0.158887	0.159166
984	0.178684	0.15901	0.160805
985	0.176166	0.157892	0.161053
986	0.177236	0.158014	0.163232
987	0.176241	0.158148	0.165173
988	0.174788	0.158618	0.1647
989	0.176029	0.158065	0.165205
990	0.179433	0.158484	0.164409
991	0.175615	0.158449	0.164895
992	0.175023	0.158553	0.163296
993	0.174095	0.157994	0.165596
994	0.173642	0.157683	0.166439
995	0.170528	0.157765	0.165796
996	0.172145	0.159705	0.164369
997	0.17418	0.158433	0.164772
998	0.176422	0.157137	0.166018
999	0.176687	0.156372	0.164642
1000	0.17807	0.154786	0.165308
1001	0.177968	0.154838	0.167721
1002	0.172795	0.157401	0.166062
1003	0.170107	0.158681	0.165593
1004	0.16956	0.160248	0.169424
1005	0.169692	0.162074	0.169886
1006	0.171992	0.158993	0.167078
1007	0.176327	0.159521	0.169726
1008	0.180929	0.158311	0.168319
1009	0.183148	0.159191	0.165191
1010	0.179201	0.158368	0.166062
1011	0.178681	0.160827	0.167494
1012	0.176428	0.158407	0.169625
1013	0.175036	0.15946	0.172819
1014	0.172489	0.158018	0.173774
1015	0.177487	0.158557	0.173257
1016	0.175656	0.157262	0.175391
1017	0.177362	0.158789	0.172121
1018	0.179779	0.159744	0.16955
1019	0.182631	0.159562	0.170918
1020	0.181153	0.160175	0.172775
1021	0.183438	0.158664	0.17036
1022	0.184351	0.158529	0.169101
1023	0.183837	0.157074	0.168346
1024	0.180942	0.157287	0.166386
1025	0.18356	0.156411	0.164283
1026	0.184482	0.159658	0.163561
1027	0.182397	0.156385	0.164909
1028	0.17985	0.157906	0.163722
1029	0.181428	0.1601	0.163776
1030	0.181458	0.16013	0.165575
1031	0.1795	0.160149	0.166509
1032	0.1812	0.164016	0.167001
1033	0.183217	0.162569	0.167415
1034	0.183631	0.1615	0.166233
1035	0.184866	0.160443	0.164547
1036	0.187126	0.160258	0.165111
1037	0.187364	0.159256	0.162987
1038	0.185801	0.162687	0.16253
1039	0.188726	0.163924	0.162514
1040	0.190358	0.16389	0.162851
1041	0.191461	0.164341	0.16085
1042	0.191914	0.164848	0.162991
1043	0.194369	0.161886	0.164852
1044	0.193336	0.160039	0.164772
1045	0.1874	0.161059	0.164038
1046	0.183878	0.16095	0.167103
1047	0.183639	0.159681	0.167588
1048	0.18202	0.158907	0.16732
1049	0.179546	0.158062	0.17087
1050	0.181916	0.157975	0.172688
1051	0.182861	0.159556	0.17294
1052	0.184029	0.158038	0.172015
1053	0.183332	0.159277	0.172761
1054	0.184885	0.160343	0.171767
1055	0.185493	0.157393	0.172841
1056	0.186608	0.154526	0.17119
1057	0.184549	0.157961	0.172408
1058	0.185381	0.159159	0.174406
1059	0.182161	0.159891	0.179459
1060	0.181177	0.163843	0.180707
1061	0.178524	0.16204	0.184002
1062	0.180159	0.160867	0.187354
1063	0.180086	0.157662	0.188088
1064	0.183341	0.156717	0.185855
1065	0.181047	0.154521	0.185054
1066	0.181907	0.157163	0.185953
1067	0.180932	0.156498	0.184531
1068	0.182768	0.159308	0.179982
1069	0.18014	0.15805	0.179255
1070	0.180672	0.159927	0.179952
1071	0.184246	0.158146	0.177458
1072	0.181261	0.160217	0.177595
1073	0.179657	0.159886	0.182484
1074	0.178414	0.160152	0.182749
1075	0.17918	0.158842	0.182358
1076	0.173175	0.160998	0.183355
1077	0.173976	0.159829	0.182191
1078	0.171113	0.158715	0.179361
1079	0.172037	0.159647	0.178295
1080	0.170824	0.161159	0.177137
1081	0.173298	0.159294	0.175693
1082	0.173726	0.156968	0.176543
1083	0.173737	0.158051	0.177248
1084	0.171518	0.155614	0.177617
1085	0.171581	0.155242	0.179094
1086	0.16918	0.155437	0.179534
1087	0.168191	0.156959	0.181722
1088	0.16817	0.155408	0.183203
1089	0.16826	0.15937	0.182447
1090	0.166123	0.158187	0.183302
1091	0.16634	0.157859	0.181535
1092	0.165087	0.157718	0.177602
1093	0.164999	0.158337	0.174658
1094	0.164467	0.155323	0.173747
1095	0.163127	0.156417	0.173632
1096	0.16124	0.159041	0.176244
1097	0.1601	0.159951	0.176334
1098	0.15798	0.159173	0.178857
1099	0.157335	0.16049	0.18163
1100	0.16088	0.161351	0.181064
1101	0.162735	0.158481	0.179682
1102	0.1654	0.158693	0.179404
1103	0.165092	0.159918	0.176722
1104	0.164936	0.161206	0.176273
1105	0.163302	0.160165	0.174063
1106	0.163973	0.161251	0.174358
1107	0.162174	0.159423	0.17502
1108	0.163755	0.162208	0.175724
1109	0.163715	0.160991	0.175743
1110	0.160385	0.161824	0.174666
1111	0.157014	0.161769	0.175937
1112	0.157563	0.163103	0.175539
1113	0.15646	0.15706	0.175828
1114	0.156142	0.15858	0.174703
1115	0.159313	0.156855	0.17846
1116	0.16091	0.155376	0.176401
1117	0.158039	0.157422	0.177711
1118	0.15698	0.160419	0.18037
1119	0.157482	0.158558	0.180684
1120	0.15848	0.158483	0.179311
1121	0.15957	0.156783	0.180853
1122	0.159472	0.154411	0.179219
1123	0.158886	0.155614	0.175512
1124	0.16005	0.156294	0.174276
1125	0.157398	0.157144	0.173652
1126	0.156233	0.159007	0.170493
1127	0.157388	0.160417	0.169382
1128	0.160634	0.158905	0.171798
1129	0.160551	0.158808	0.170514
1130	0.1604	0.158985	0.169918
1131	0.161667	0.160314	0.172738
1132	0.1636	0.160913	0.177039
1133	0.164266	0.16124	0.17427
1134	0.161896	0.162501	0.175221
1135	0.163539	0.162583	0.174322
1136	0.159957	0.162596	0.175792
1137	0.156821	0.161311	0.172942
1138	0.152524	0.159724	0.1757
1139	0.154116	0.160703	0.177129
1140	0.152241	0.157746	0.177514
1141	0.155164	0.159105	0.175866
1142	0.157945	0.15808	0.17792
1143	0.160946	0.159942	0.178197
1144	0.162152	0.15588	0.178175
1145	0.161052	0.158092	0.179539
1146	0.159778	0.156414	0.179017
1147	0.160856	0.158591	0.175948
1148	0.158287	0.160858	0.175586
1149	0.155985	0.16346	0.176234
1150	0.157889	0.165725	0.175395
1151	0.158855	0.166369	0.174555
1152	0.157151	0.16373	0.176659
1153	0.157752	0.162612	0.177447
1154	0.156546	0.161601	0.176812
1155	0.15618	0.157964	0.17822
1156	0.155432	0.157207	0.180175
1157	0.155965	0.159267	0.177567
1158	0.155317	0.157948	0.175342
1159	0.157925	0.159579	0.174247
1160	0.156983	0.160078	0.174451
1161	0.158561	0.163711	0.175133
1162	0.158012	0.16194	0.177378
1163	0.160272	0.163581	0.180391
1164	0.160206	0.161761	0.178759
1165	0.1632	0.163271	0.177588
1166	0.162979	0.159522	0.178266
1167	0.163118	0.161049	0.177741
1168	0.160417	0.158113	0.175147
1169	0.160428	0.160788	0.178524
1170	0.157558	0.160696	0.179348
1171	0.155064	0.159345	0.177525
1172	0.152321	0.15797	0.175756
1173	0.1521	0.157538	0.174043
1174	0.151988	0.154857	0.172717
1175	0.15373	0.154391	0.171213
1176	0.156177	0.155613	0.172402
1177	0.157918	0.157102	0.174956
1178	0.161678	0.159348	0.178512
1179	0.158388	0.159451	0.17769
1180	0.155663	0.157593	0.177896
1181	0.155754	0.157172	0.177927
1182	0.154485	0.1552	0.176077
1183	0.15278	0.156579	0.172717
1184	0.155398	0.158156	0.1732
1185	0.156752	0.158863	0.172943
1186	0.154526	0.159356	0.170789
1187	0.15434	0.160152	0.171967
1188	0.153178	0.158656	0.173866
1189	0.152171	0.155936	0.173175
1190	0.153622	0.157504	0.173561
1191	0.154873	0.157412	0.174341
1192	0.156473	0.158908	0.173923
1193	0.156766	0.158371	0.174314
1194	0.160535	0.160128	0.173998
1195	0.157896	0.161058	0.173175
1196	0.157835	0.161479	0.174442
1197	0.159959	0.160396	0.175073
1198	0.159269	0.161282	0.175229
1199	0.158441	0.159797	0.174914
1200	0.161149	0.159546	0.175135
1201	0.160196	0.162941	0.174425
1202	0.157817	0.162768	0.174384
1203	0.159346	0.16281	0.171823
1204	0.159234	0.163288	0.172869
1205	0.157549	0.162509	0.172871
1206	0.159643	0.160396	0.171856
1207	0.159705	0.160868	0.170571
1208	0.158276	0.161361	0.170738
1209	0.153394	0.161982	0.17117
1210	0.157714	0.1628	0.170342
1211	0.15524	0.162289	0.170066
1212	0.154963	0.162184	0.169136
1213	0.157395	0.161798	0.171419
1214	0.160189	0.163829	0.171148
1215	0.157075	0.163791	0.173112
1216	0.15727	0.162404	0.172666
1217	0.160369	0.161993	0.173998
1218	0.162099	0.163211	0.17245
1219	0.161249	0.163624	0.172741
1220	0.161023	0.163125	0.171656
1221	0.162182	0.163353	0.172297
1222	0.161841	0.16515	0.172768
1223	0.158152	0.16389	0.173715
1224	0.158426	0.161671	0.172931
1225	0.156414	0.164137	0.17171
1226	0.153801	0.162032	0.171196
1227	0.151321	0.16215	0.17166
1228	0.150957	0.161108	0.172231
1229	0.152779	0.16201	0.17274
1230	0.152294	0.160153	0.174301
1231	0.153295	0.163558	0.174863
1232	0.155744	0.1627	0.176033
1233	0.155991	0.16299	0.175676
1234	0.156089	0.162504	0.174542
1235	0.159766	0.163814	0.174726
1236	0.161702	0.163702	0.173648
1237	0.160534	0.162486	0.1709
1238	0.163835	0.162784	0.170168
1239	0.164686	0.162615	0.171422
1240	0.166813	0.159577	0.172132
1241	0.164806	0.15712	0.172682
1242	0.16388	0.160337	0.174986
1243	0.162193	0.162287	0.174634
1244	0.159809	0.164499	0.173408
1245	0.157653	0.165179	0.17236
1246	0.157275	0.169138	0.173627
1247	0.157343	0.166413	0.171192
1248	0.15671	0.164254	0.171333
1249	0.155317	0.162347	0.173781
1250	0.156075	0.165244	0.172768
1251	0.156272	0.164517	0.172369
1252	0.15752	0.164279	0.173035
1253	0.157978	0.164975	0.172748
1254	0.16179	0.16623	0.169713
1255	0.157166	0.165197	0.17205
1256	0.157364	0.166152	0.173508
1257	0.154692	0.167328	0.171566
1258	0.156078	0.169252	0.172267
1259	0.155318	0.170175	0.173385
1260	0.157042	0.167922	0.170597
1261	0.159419	0.167154	0.168564
1262	0.161916	0.16779	0.171255
1263	0.157038	0.166143	0.171299
1264	0.157631	0.165317	0.170135
1265	0.160511	0.169331	0.172572
1266	0.159037	0.169853	0.17275
1267	0.158963	0.170116	0.171609
1268	0.161928	0.174109	0.173287
1269	0.15952	0.173447	0.176054
1270	0.155537	0.170459	0.174535
1271	0.153942	0.170885	0.173719
1272	0.154408	0.172238	0.174129
1273	0.155547	0.170755	0.173784
1274	0.155015	0.170915	0.172886
1275	0.157696	0.17144	0.174961
1276	0.158544	0.171567	0.174684
1277	0.157308	0.169399	0.175758
1278	0.154327	0.167527	0.175412
1279	0.157013	0.169882	0.172279
1280	0.156845	0.168341	0.172318
1281	0.158248	0.168567	0.173668
1282	0.157218	0.170363	0.171037
1283	0.158126	0.171948	0.170147
1284	0.155025	0.170236	0.169927
1285	0.151708	0.17248	0.168598
1286	0.150591	0.169781	0.167923
1287	0.152384	0.166991	0.168845
1288	0.153725	0.165586	0.168075
1289	0.156533	0.16502	0.169269
1290	0.158883	0.165334	0.167161
1291	0.157782	0.166699	0.167506
1292	0.159016	0.167425	0.168468
1293	0.160743	0.165192	0.169234
1294	0.16029	0.164022	0.171356
1295	0.161567	0.163433	0.170823
1296	0.162392	0.164356	0.171723
1297	0.162121	0.164713	0.170681
1298	0.161316	0.166796	0.169164
1299	0.162792	0.16589	0.168285
1300	0.162205	0.16661	0.169714
1301	0.165685	0.164798	0.169494
1302	0.163354	0.164343	0.17114
1303	0.16508	0.16492	0.171303
1304	0.162847	0.164132	0.172179
1305	0.163683	0.163996	0.17358
1306	0.162599	0.164405	0.172858
1307	0.162925	0.164815	0.172087
1308	0.161223	0.162677	0.172668
1309	0.163584	0.164803	0.173073
1310	0.165037	0.161584	0.171345
1311	0.165696	0.161281	0.17106
1312	0.165604	0.159311	0.169747
1313	0.165041	0.159475	0.16998
1314	0.162	0.158822	0.168369
1315	0.160592	0.160824	0.170406
1316	0.159326	0.162717	0.168576
1317	0.159059	0.163841	0.170888
1318	0.159857	0.163997	0.169242
1319	0.161585	0.163727	0.170277
1320	0.161715	0.164226	0.169266
1321	0.161213	0.162945	0.170692
1322	0.162474	0.163185	0.170471
1323	0.159065	0.164754	0.172332
1324	0.158793	0.166448	0.170759
1325	0.159471	0.166067	0.170158
1326	0.159078	0.166437	0.169385
1327	0.158913	0.165817	0.167736
1328	0.162746	0.165314	0.166866
1329	0.162378	0.164923	0.167108
1330	0.161609	0.165194	0.167912
1331	0.160825	0.164506	0.169717
1332	0.161997	0.165054	0.169499
1333	0.16267	0.164508	0.170151
1334	0.161694	0.163145	0.169952
1335	0.162113	0.163045	0.17073
1336	0.164326	0.163568	0.17082
1337	0.161079	0.165113	0.170802
1338	0.159901	0.164398	0.170989
1339	0.161556	0.1667	0.171423
1340	0.160692	0.166491	0.168674
1341	0.159876	0.16585	0.16672
1342	0.161787	0.166466	0.167389
1343	0.161371	0.1688	0.166932
1344	0.16024	0.167721	0.166811
1345	0.158678	0.168138	0.167623
1346	0.159029	0.169635	0.167385
1347	0.157829	0.167349	0.167112
1348	0.154895	0.164837	0.166875
1349	0.154841	0.163953	0.1671
1350	0.155555	0.163676	0.169108
1351	0.155454	0.159477	0.171404
1352	0.155206	0.160217	0.170687
1353	0.158114	0.161241	0.170398
1354	0.159378	0.161379	0.169429
1355	0.157901	0.161683	0.168141
1356	0.157612	0.163498	0.167862
1357	0.159176	0.163975	0.17013
1358	0.158166	0.164533	0.169278
1359	0.159099	0.164824	0.168681
1360	0.162632	0.164269	0.168178
1361	0.163582	0.164986	0.16578
1362	0.164693	0.165391	0.16242
1363	0.164777	0.165459	0.164117
1364	0.163483	0.165387	0.164155
1365	0.162726	0.165173	0.165645
1366	0.162256	0.166984	0.168503
1367	0.160495	0.165614	0.169505
1368	0.160254	0.16463	0.168299
1369	0.163847	0.164701	0.168731
1370	0.163899	0.163188	0.164936
1371	0.165392	0.163279	0.161921
1372	0.165518	0.166149	0.162911
1373	0.165279	0.164676	0.162212
1374	0.161444	0.166571	0.16191
1375	0.157461	0.171304	0.164569
1376	0.15649	0.166558	0.166454
1377	0.157688	0.163969	0.165139
1378	0.159046	0.167397	0.163963
1379	0.1598	0.164022	0.164173
1380	0.160197	0.162083	0.16391
1381	0.159154	0.16618	0.163883
1382	0.158381	0.165204	0.163647
1383	0.158166	0.163149	0.166303
1384	0.156461	0.163802	0.167764
1385	0.158754	0.163602	0.166885
1386	0.160341	0.161366	0.167486
1387	0.160325	0.161595	0.167034
1388	0.160555	0.161949	0.167517
1389	0.162919	0.162382	0.165454
1390	0.164671	0.162657	0.168051
1391	0.164647	0.164051	0.166025
1392	0.164651	0.166317	0.167622
1393	0.164286	0.166484	0.167137
1394	0.161972	0.16531	0.168608
1395	0.161808	0.165159	0.166156
1396	0.161148	0.164805	0.165472
1397	0.160582	0.16189	0.165377
1398	0.160531	0.160941	0.166712
1399	0.160384	0.160886	0.164452
1400	0.157996	0.158946	0.164595
1401	0.15544	0.158019	0.164841
1402	0.155217	0.158958	0.163108
1403	0.156357	0.157602	0.159252
1404	0.156943	0.160683	0.160989
1405	0.157368	0.160631	0.161859
1406	0.159974	0.161	0.162821
1407	0.1608	0.160001	0.162911
1408	0.158892	0.161601	0.164475
1409	0.158294	0.160817	0.163814
1410	0.158451	0.162424	0.162977
1411	0.156036	0.164083	0.164318
1412	0.15303	0.163694	0.166072
1413	0.152401	0.163609	0.166032
1414	0.151729	0.163761	0.167898
1415	0.152	0.163964	0.167608
1416	0.154228	0.162899	0.165112
1417	0.156174	0.16374	0.165842
1418	0.157145	0.16558	0.164959
1419	0.157655	0.162849	0.163286
1420	0.157474	0.161218	0.163434
1421	0.15732	0.161651	0.163838
1422	0.158366	0.160787	0.163071
1423	0.157528	0.159369	0.164617
1424	0.157843	0.161227	0.164749
1425	0.155562	0.159633	0.165113
1426	0.156068	0.158604	0.167179
1427	0.156556	0.160908	0.165254
1428	0.154543	0.159646	0.166807
1429	0.154233	0.15848	0.170071
1430	0.156879	0.162135	0.166874
1431	0.15461	0.161712	0.164283
1432	0.150774	0.159341	0.165809
1433	0.154232	0.162326	0.163775
1434	0.156351	0.161922	0.161333
1435	0.159349	0.160582	0.164053
1436	0.159936	0.161358	0.165403
1437	0.161616	0.161918	0.166609
1438	0.161333	0.160641	0.166103
1439	0.1592	0.160212	0.1647
1440	0.156461	0.161286	0.164278
1441	0.156653	0.159554	0.163152
1442	0.15651	0.160245	0.162595
1443	0.156467	0.155887	0.161854
1444	0.154728	0.155005	0.163586
1445	0.152189	0.153233	0.163764
1446	0.15168	0.152879	0.164524
1447	0.152075	0.153959	0.163219
1448	0.151758	0.157598	0.163676
1449	0.154642	0.1633	0.16194
1450	0.154138	0.162262	0.1622
1451	0.156062	0.163334	0.163616
1452	0.155786	0.160924	0.162682
1453	0.157983	0.158743	0.162738
1454	0.158483	0.155442	0.162488
1455	0.160764	0.157886	0.163178
1456	0.160089	0.159187	0.164353
1457	0.160158	0.160976	0.167057
1458	0.15776	0.162923	0.168227
1459	0.156162	0.164389	0.169611
1460	0.155101	0.163841	0.16904
1461	0.152158	0.163906	0.168191
1462	0.153714	0.162888	0.167088
1463	0.153429	0.162534	0.163915
1464	0.153475	0.161827	0.163541
1465	0.154362	0.160837	0.163815
1466	0.157705	0.157246	0.160237
1467	0.156286	0.159055	0.160497
1468	0.157911	0.160023	0.164009
1469	0.160527	0.158051	0.164197
1470	0.161868	0.158994	0.163238
1471	0.160098	0.161399	0.16367
1472	0.160632	0.1595	0.163151
1473	0.158199	0.159269	0.161947
1474	0.154921	0.161323	0.159938
1475	0.154982	0.162516	0.16055
1476	0.153737	0.162529	0.162317
1477	0.152795	0.163083	0.163177
1478	0.153962	0.163783	0.162642
1479	0.154545	0.162101	0.164576
1480	0.152296	0.158446	0.164448
1481	0.153863	0.159357	0.162276
1482	0.156042	0.158694	0.160777
1483	0.155597	0.158465	0.162096
1484	0.154473	0.158464	0.159505
1485	0.155456	0.158997	0.159619
1486	0.156543	0.157844	0.15956
1487	0.156386	0.156753	0.159974
1488	0.157349	0.155302	0.160344
1489	0.156597	0.156001	0.164507
1490	0.159263	0.155347	0.163868
1491	0.157255	0.156733	0.167282
1492	0.157103	0.156444	0.16942
1493	0.158545	0.1564	0.167461
1494	0.15916	0.156784	0.165297
1495	0.154661	0.158908	0.167166
1496	0.156137	0.157817	0.163747
1497	0.155656	0.157426	0.162919
1498	0.152369	0.157773	0.165377
1499	0.153818	0.15673	0.164473
1500	0.153327	0.157209	0.162161

## Sheet: graph
Figure5A
Fluctuation-positive cells (%)			Fluctuation amplitude (ΔF340/F380)
Vehicle	FTY720		Vehicle	FTY720
73.3333	43.3333		0.0804426	0.0199362
83.3333	40		0.0748138	0.0227149
93.3333	36.6667		0.0888593	0.0175387
90	26.6667		0.122616	0.0158446
