# Supplementary material for: C-type natriuretic peptide facilitates autonomic Ca2+ entry in growth plate chondrocytes for stimulating bone growth
Source: eLife. 2022 Mar 15;11:e71931. doi: 10.7554/eLife.71931 (PMC8923661; doi:10.7554/eLife.71931)
Supplement: Figure 5—source data 2. [file elife-71931-fig5-data2.xlsx]

## Sheet: trace
Figure 5B
NNC550396 (30 mM)
Npr2fl/fl, Col2a1-Cre-/-					Npr2fl/fl, Col2a1-Cre+/-
Times (s)	Cell1	Cell2	Cell3		Times (s)	Cell1	Cell2	Cell3
0	0.198143	0.186032	0.169468		0	0.193606	0.203784	0.179406
1	0.198651	0.181016	0.176301		1	0.196174	0.204135	0.180072
2	0.199766	0.180049	0.177157		2	0.195157	0.205011	0.178732
3	0.197918	0.175594	0.178876		3	0.196207	0.207232	0.179888
4	0.200537	0.171202	0.17933		4	0.194776	0.207613	0.182536
5	0.198355	0.171734	0.184226		5	0.195362	0.206294	0.183849
6	0.198312	0.17263	0.17973		6	0.192914	0.206518	0.182704
7	0.195748	0.173212	0.179007		7	0.195528	0.206463	0.185782
8	0.19676	0.179535	0.179323		8	0.194541	0.205116	0.183346
9	0.197722	0.180287	0.179132		9	0.191853	0.204339	0.181108
10	0.197699	0.178645	0.178203		10	0.191711	0.206355	0.181362
11	0.194018	0.18076	0.179629		11	0.190992	0.206904	0.182541
12	0.194948	0.181379	0.178927		12	0.190319	0.206192	0.181585
13	0.194423	0.178529	0.178586		13	0.191963	0.207702	0.18228
14	0.191089	0.178734	0.178109		14	0.195554	0.209833	0.181038
15	0.18944	0.179221	0.176158		15	0.198693	0.207085	0.180605
16	0.189851	0.179787	0.17356		16	0.200207	0.206075	0.17963
17	0.18983	0.177174	0.177451		17	0.199385	0.205244	0.179533
18	0.188116	0.177532	0.177363		18	0.199572	0.20419	0.179431
19	0.19031	0.179058	0.176673		19	0.200063	0.201345	0.181004
20	0.189221	0.178753	0.178082		20	0.196916	0.201605	0.180761
21	0.188071	0.177545	0.184968		21	0.19422	0.198616	0.179512
22	0.1879	0.180218	0.181015		22	0.193709	0.201081	0.178153
23	0.188121	0.180392	0.177877		23	0.192959	0.200196	0.179783
24	0.184089	0.181422	0.175901		24	0.193704	0.203262	0.178018
25	0.183556	0.182328	0.176809		25	0.195836	0.203766	0.178275
26	0.184952	0.1832	0.170294		26	0.196693	0.206899	0.179816
27	0.181408	0.180199	0.168822		27	0.196928	0.204228	0.180696
28	0.181571	0.179715	0.171485		28	0.197478	0.204577	0.17842
29	0.18344	0.178831	0.17578		29	0.194823	0.203206	0.180675
30	0.182476	0.177408	0.174799		30	0.19465	0.203382	0.180082
31	0.181045	0.175742	0.173887		31	0.197837	0.203128	0.180226
32	0.18406	0.180338	0.17232		32	0.196703	0.203504	0.181161
33	0.182195	0.180985	0.169693		33	0.195866	0.204013	0.18261
34	0.181475	0.180902	0.170374		34	0.195809	0.202089	0.183703
35	0.182769	0.181452	0.169077		35	0.196728	0.202523	0.183186
36	0.183871	0.183581	0.170209		36	0.195961	0.202479	0.183219
37	0.180222	0.183177	0.172972		37	0.198483	0.202334	0.182968
38	0.179531	0.181828	0.177188		38	0.197736	0.200455	0.182826
39	0.177528	0.182019	0.17561		39	0.199783	0.199454	0.181585
40	0.177798	0.183032	0.177055		40	0.199656	0.197756	0.182389
41	0.175766	0.180256	0.180719		41	0.200166	0.197238	0.183704
42	0.175043	0.178417	0.182821		42	0.198576	0.196351	0.182704
43	0.175867	0.177538	0.177403		43	0.197833	0.197421	0.181428
44	0.175934	0.176869	0.181315		44	0.195924	0.196889	0.18365
45	0.175531	0.171042	0.184143		45	0.196063	0.195762	0.184927
46	0.174634	0.170715	0.182916		46	0.195921	0.196437	0.183341
47	0.174249	0.170658	0.181865		47	0.198971	0.193972	0.182594
48	0.174965	0.171591	0.185283		48	0.203066	0.193914	0.184451
49	0.176426	0.170611	0.178802		49	0.204706	0.196925	0.181406
50	0.175613	0.173489	0.180101		50	0.204115	0.199362	0.178938
51	0.178177	0.174792	0.176453		51	0.201678	0.198343	0.179415
52	0.182188	0.177183	0.178119		52	0.200635	0.199529	0.178354
53	0.181996	0.179009	0.178502		53	0.197476	0.200549	0.175998
54	0.180758	0.180676	0.178654		54	0.197744	0.197385	0.176742
55	0.180277	0.181968	0.173372		55	0.197899	0.194647	0.179053
56	0.180863	0.180362	0.17676		56	0.201004	0.193564	0.176452
57	0.178887	0.17582	0.176594		57	0.200316	0.195155	0.179114
58	0.177836	0.176185	0.17392		58	0.203186	0.192069	0.178793
59	0.17817	0.173709	0.177111		59	0.202162	0.194362	0.177629
60	0.179259	0.17227	0.179114		60	0.201485	0.193886	0.176219
61	0.179256	0.176948	0.17883		61	0.199997	0.193711	0.17906
62	0.180961	0.180188	0.17534		62	0.201034	0.194158	0.179463
63	0.179235	0.180126	0.177982		63	0.199091	0.195612	0.179552
64	0.179209	0.185098	0.17579		64	0.202283	0.194273	0.17919
65	0.178372	0.188677	0.175385		65	0.203603	0.195889	0.177687
66	0.176817	0.188998	0.172939		66	0.203993	0.197659	0.177259
67	0.175141	0.189882	0.175908		67	0.203144	0.198478	0.176267
68	0.178229	0.189358	0.178904		68	0.204287	0.195519	0.177261
69	0.179068	0.18931	0.181566		69	0.200003	0.193924	0.180086
70	0.181389	0.192228	0.183121		70	0.198852	0.194071	0.181371
71	0.181144	0.19302	0.184044		71	0.198194	0.193373	0.179942
72	0.180647	0.199739	0.178694		72	0.196637	0.19145	0.181828
73	0.180458	0.201976	0.175719		73	0.194034	0.192774	0.179631
74	0.179763	0.206275	0.180891		74	0.196498	0.19385	0.178465
75	0.177746	0.205049	0.178468		75	0.194705	0.195499	0.178851
76	0.178685	0.208057	0.181714		76	0.197076	0.195329	0.179764
77	0.177115	0.202322	0.188526		77	0.198456	0.196501	0.176901
78	0.176599	0.204351	0.191298		78	0.201207	0.199762	0.179568
79	0.176354	0.200242	0.189189		79	0.202535	0.201161	0.179548
80	0.178063	0.199669	0.194079		80	0.204085	0.198811	0.17822
81	0.176717	0.200447	0.193569		81	0.200379	0.197338	0.17772
82	0.178465	0.203666	0.196998		82	0.199941	0.19435	0.177435
83	0.176524	0.206205	0.19779		83	0.19983	0.190959	0.176637
84	0.177413	0.208174	0.195744		84	0.1962	0.186963	0.176614
85	0.175073	0.212488	0.192693		85	0.195599	0.188636	0.176246
86	0.175815	0.210621	0.191595		86	0.199093	0.187119	0.176257
87	0.175684	0.210527	0.187126		87	0.19865	0.187127	0.177611
88	0.177354	0.208742	0.186444		88	0.196655	0.18738	0.176918
89	0.17712	0.208669	0.187041		89	0.198291	0.189899	0.17457
90	0.175958	0.205511	0.184628		90	0.200126	0.187244	0.175052
91	0.174332	0.205979	0.184821		91	0.200651	0.189238	0.175753
92	0.173779	0.206343	0.187443		92	0.203295	0.191509	0.174282
93	0.175017	0.204152	0.182272		93	0.204627	0.192138	0.174359
94	0.174219	0.201362	0.180175		94	0.204403	0.194448	0.175711
95	0.175433	0.201075	0.179365		95	0.205893	0.192006	0.175935
96	0.17526	0.198525	0.179313		96	0.203172	0.191228	0.175217
97	0.174516	0.193675	0.178388		97	0.201816	0.191937	0.176014
98	0.171604	0.190304	0.177		98	0.19955	0.192117	0.17603
99	0.170652	0.19032	0.178222		99	0.199486	0.187186	0.177497
100	0.170957	0.186561	0.181694		100	0.199321	0.1897	0.178277
101	0.172587	0.181726	0.17976		101	0.200218	0.191616	0.179409
102	0.174019	0.181204	0.177438		102	0.200612	0.190447	0.180124
103	0.173336	0.180316	0.181329		103	0.203284	0.190215	0.181048
104	0.174384	0.180124	0.17807		104	0.202591	0.193039	0.179869
105	0.175489	0.179411	0.176676		105	0.200693	0.192815	0.180189
106	0.176088	0.181814	0.174655		106	0.20017	0.188397	0.177963
107	0.176882	0.180995	0.173364		107	0.198272	0.188591	0.177774
108	0.17923	0.181005	0.172488		108	0.195765	0.185778	0.179671
109	0.177234	0.180942	0.175704		109	0.194657	0.182519	0.179478
110	0.175006	0.187195	0.17139		110	0.189653	0.181316	0.178693
111	0.175008	0.187889	0.175859		111	0.188421	0.183892	0.18031
112	0.171999	0.189032	0.174076		112	0.185354	0.183237	0.179829
113	0.171864	0.191101	0.175261		113	0.185547	0.18481	0.178498
114	0.173905	0.189799	0.176116		114	0.186501	0.188346	0.177743
115	0.175581	0.185555	0.179252		115	0.18883	0.19034	0.176458
116	0.174364	0.185112	0.178587		116	0.189137	0.189135	0.177446
117	0.174798	0.18354	0.179667		117	0.193035	0.189891	0.178434
118	0.173294	0.183875	0.178122		118	0.193245	0.191866	0.175189
119	0.174741	0.183576	0.174881		119	0.191998	0.190855	0.175439
120	0.174666	0.183893	0.174999		120	0.194291	0.191775	0.177837
121	0.17275	0.186779	0.172351		121	0.193477	0.195645	0.177006
122	0.175143	0.185519	0.173595		122	0.193722	0.197521	0.176534
123	0.176404	0.183469	0.173961		123	0.194727	0.194784	0.179052
124	0.176096	0.18215	0.177096		124	0.193919	0.19473	0.179011
125	0.173885	0.180029	0.177986		125	0.190649	0.196293	0.179143
126	0.178464	0.174375	0.18193		126	0.193194	0.194758	0.178889
127	0.178712	0.175582	0.180553		127	0.190143	0.19253	0.178769
128	0.181669	0.174712	0.181677		128	0.188349	0.194327	0.177811
129	0.181019	0.176727	0.179318		129	0.188473	0.194161	0.178022
130	0.183094	0.177423	0.176969		130	0.189986	0.191435	0.177988
131	0.180906	0.176395	0.173715		131	0.187523	0.191421	0.174971
132	0.179299	0.174429	0.175441		132	0.190225	0.191089	0.173444
133	0.176581	0.175965	0.177804		133	0.189086	0.190104	0.172402
134	0.174926	0.171291	0.1811		134	0.186123	0.189097	0.175686
135	0.173518	0.168211	0.181965		135	0.186623	0.189864	0.174508
136	0.170995	0.167613	0.180896		136	0.188156	0.19111	0.177724
137	0.169587	0.168548	0.183286		137	0.18524	0.191666	0.178712
138	0.169341	0.164467	0.176644		138	0.186064	0.190087	0.180996
139	0.169634	0.164316	0.16994		139	0.188373	0.193063	0.177008
140	0.169404	0.164969	0.172378		140	0.188086	0.195454	0.177896
141	0.170429	0.165611	0.173355		141	0.186961	0.190356	0.176599
142	0.172341	0.164289	0.172607		142	0.190524	0.188392	0.176313
143	0.174255	0.167914	0.173809		143	0.193211	0.191075	0.177661
144	0.173432	0.172816	0.179386		144	0.191872	0.190279	0.180661
145	0.17211	0.174226	0.175441		145	0.192678	0.188042	0.177653
146	0.176515	0.176635	0.173851		146	0.190714	0.191464	0.177469
147	0.176639	0.177371	0.169705		147	0.190404	0.193788	0.17876
148	0.174583	0.173181	0.170686		148	0.186088	0.194222	0.174408
149	0.179032	0.173148	0.168317		149	0.188762	0.192334	0.170384
150	0.183114	0.171971	0.170049		150	0.190675	0.192153	0.17517
151	0.181059	0.171079	0.171137		151	0.193196	0.190541	0.177823
152	0.182805	0.17117	0.172874		152	0.191821	0.190313	0.175332
153	0.182097	0.172893	0.175406		153	0.193734	0.188206	0.177883
154	0.180286	0.173058	0.175923		154	0.190653	0.18757	0.180271
155	0.179874	0.17238	0.17978		155	0.186289	0.187262	0.177776
156	0.179922	0.171383	0.18229		156	0.187194	0.19011	0.176304
157	0.178258	0.168959	0.183528		157	0.18626	0.188646	0.176848
158	0.178272	0.167946	0.182815		158	0.187736	0.189949	0.17562
159	0.179133	0.165284	0.180149		159	0.191935	0.192174	0.178013
160	0.177967	0.164583	0.17933		160	0.192755	0.19051	0.176872
161	0.176605	0.162238	0.179493		161	0.191985	0.189624	0.175132
162	0.17841	0.165736	0.180685		162	0.1925	0.190771	0.177952
163	0.179065	0.166513	0.183247		163	0.19085	0.188487	0.180729
164	0.176466	0.167255	0.185368		164	0.189676	0.18767	0.177427
165	0.173671	0.168024	0.181046		165	0.191682	0.189242	0.177796
166	0.174908	0.169217	0.176714		166	0.191513	0.190022	0.181839
167	0.173391	0.167781	0.175761		167	0.19063	0.188026	0.181385
168	0.175921	0.167922	0.170703		168	0.191126	0.188389	0.179034
169	0.17512	0.166272	0.172028		169	0.190851	0.189317	0.180105
170	0.177142	0.165693	0.172094		170	0.190071	0.188901	0.182084
171	0.1763	0.164192	0.176838		171	0.192731	0.186505	0.181124
172	0.174489	0.165922	0.172602		172	0.191362	0.187888	0.178877
173	0.173596	0.164754	0.173339		173	0.19141	0.191014	0.181005
174	0.176008	0.163606	0.172277		174	0.192053	0.188893	0.179914
175	0.177011	0.164908	0.173018		175	0.194323	0.190656	0.178891
176	0.177221	0.168068	0.170366		176	0.195576	0.192561	0.176651
177	0.180128	0.167314	0.170816		177	0.201295	0.191775	0.177405
178	0.178132	0.169212	0.174226		178	0.205946	0.190703	0.174884
179	0.177346	0.169917	0.174752		179	0.210318	0.190787	0.173752
180	0.178013	0.170185	0.177229		180	0.208152	0.188844	0.173028
181	0.179578	0.16897	0.177756		181	0.20587	0.186667	0.17351
182	0.178394	0.168354	0.178854		182	0.206001	0.188504	0.173455
183	0.179385	0.166544	0.171417		183	0.207147	0.186718	0.171815
184	0.180078	0.167192	0.1708		184	0.204162	0.186522	0.171711
185	0.179959	0.16807	0.172391		185	0.205557	0.187107	0.172524
186	0.178049	0.170764	0.17447		186	0.203611	0.189301	0.17249
187	0.179042	0.17054	0.1739		187	0.199531	0.187569	0.17208
188	0.178589	0.172015	0.177263		188	0.195896	0.186307	0.173795
189	0.177729	0.170408	0.175368		189	0.193777	0.188702	0.174287
190	0.178975	0.16622	0.170506		190	0.192441	0.189012	0.175998
191	0.176891	0.162841	0.168424		191	0.193654	0.188505	0.17576
192	0.174214	0.16167	0.166823		192	0.195202	0.187624	0.174502
193	0.17619	0.16192	0.167542		193	0.194991	0.189562	0.175275
194	0.178104	0.161698	0.168086		194	0.194948	0.190395	0.174626
195	0.176273	0.161812	0.170146		195	0.193465	0.188622	0.172558
196	0.179352	0.163207	0.167151		196	0.19219	0.186131	0.171508
197	0.17765	0.168399	0.173304		197	0.190417	0.185884	0.174107
198	0.176034	0.16676	0.172569		198	0.189164	0.185523	0.17476
199	0.17422	0.170132	0.171124		199	0.19085	0.181388	0.175897
200	0.174451	0.172216	0.169027		200	0.189988	0.181951	0.175211
201	0.174582	0.174162	0.172564		201	0.191106	0.1836	0.177013
202	0.176322	0.169451	0.166252		202	0.19372	0.183304	0.174493
203	0.175864	0.168995	0.166301		203	0.19219	0.184381	0.174033
204	0.17539	0.170587	0.171233		204	0.191195	0.185726	0.17502
205	0.174428	0.170558	0.17156		205	0.192007	0.18573	0.176498
206	0.173249	0.16823	0.171057		206	0.189379	0.186228	0.177709
207	0.173451	0.168788	0.172074		207	0.187913	0.186437	0.177187
208	0.17433	0.172642	0.17254		208	0.188958	0.186161	0.175607
209	0.173961	0.167911	0.165258		209	0.18697	0.186683	0.174322
210	0.17713	0.167794	0.166477		210	0.186956	0.186032	0.172352
211	0.17822	0.166432	0.167474		211	0.189454	0.18386	0.169414
212	0.179906	0.164125	0.171879		212	0.18943	0.183567	0.171535
213	0.1818	0.160341	0.170248		213	0.18966	0.183857	0.171157
214	0.184308	0.160563	0.17012		214	0.192461	0.183211	0.171686
215	0.183067	0.163222	0.17013		215	0.194147	0.182744	0.173352
216	0.181524	0.164802	0.169342		216	0.19484	0.18501	0.176763
217	0.180196	0.170028	0.165808		217	0.193781	0.187171	0.176339
218	0.178971	0.171585	0.164599		218	0.195912	0.186721	0.177244
219	0.175567	0.170261	0.166191		219	0.194307	0.18587	0.177264
220	0.174643	0.168117	0.164		220	0.193103	0.18694	0.177819
221	0.175982	0.169032	0.163068		221	0.192296	0.183923	0.176639
222	0.177093	0.165321	0.163989		222	0.192746	0.183843	0.176435
223	0.176646	0.163031	0.169937		223	0.191225	0.182768	0.176503
224	0.178081	0.164637	0.173843		224	0.191371	0.185101	0.17541
225	0.178366	0.166901	0.172181		225	0.194671	0.184233	0.172975
226	0.178863	0.163991	0.173875		226	0.193534	0.187115	0.172628
227	0.178984	0.162438	0.173254		227	0.193778	0.184609	0.172589
228	0.179087	0.165305	0.172535		228	0.193071	0.185359	0.171699
229	0.180043	0.165962	0.173767		229	0.19435	0.186287	0.173504
230	0.178251	0.163074	0.181704		230	0.189537	0.185751	0.174885
231	0.175487	0.161746	0.179766		231	0.188957	0.184097	0.173859
232	0.175508	0.162453	0.181791		232	0.18713	0.185594	0.174732
233	0.175338	0.162747	0.18009		233	0.186108	0.185544	0.175549
234	0.173722	0.164673	0.179248		234	0.184083	0.183036	0.17653
235	0.174478	0.16469	0.174112		235	0.187461	0.185971	0.175189
236	0.177606	0.167803	0.173365		236	0.184632	0.186261	0.176457
237	0.17813	0.169889	0.172236		237	0.186456	0.186865	0.174751
238	0.178209	0.169609	0.174175		238	0.187905	0.186639	0.175538
239	0.179497	0.169071	0.170755		239	0.18866	0.187718	0.17316
240	0.17874	0.168109	0.172462		240	0.185492	0.183256	0.172249
241	0.179451	0.166259	0.17189		241	0.189734	0.181746	0.170478
242	0.177316	0.165325	0.174434		242	0.188295	0.179817	0.173295
243	0.175898	0.160539	0.172291		243	0.186436	0.179359	0.173371
244	0.176507	0.157211	0.17369		244	0.186785	0.17797	0.171892
245	0.178054	0.15808	0.1744		245	0.186992	0.179613	0.173621
246	0.176396	0.159419	0.174154		246	0.1851	0.179732	0.177682
247	0.178111	0.159028	0.167634		247	0.186673	0.182179	0.177148
248	0.179477	0.164322	0.170887		248	0.188941	0.183812	0.17754
249	0.178116	0.165752	0.170224		249	0.190016	0.184325	0.181693
250	0.179919	0.165131	0.169795		250	0.192468	0.186853	0.182245
251	0.180883	0.165067	0.173537		251	0.19354	0.187718	0.180479
252	0.18224	0.165754	0.176501		252	0.192425	0.184974	0.179533
253	0.182076	0.163526	0.172246		253	0.193651	0.183408	0.17765
254	0.183751	0.164432	0.173134		254	0.191287	0.181648	0.175255
255	0.180995	0.169259	0.169958		255	0.189598	0.182697	0.17476
256	0.181644	0.167804	0.166547		256	0.190178	0.183007	0.173343
257	0.180117	0.16739	0.171225		257	0.193893	0.183478	0.174051
258	0.181137	0.167692	0.172496		258	0.193294	0.182646	0.176095
259	0.18043	0.166811	0.168829		259	0.197134	0.184348	0.176749
260	0.178945	0.162985	0.167736		260	0.199184	0.182443	0.178215
261	0.176668	0.166267	0.170318		261	0.201375	0.182461	0.178007
262	0.175307	0.165732	0.168953		262	0.199023	0.184033	0.178904
263	0.172158	0.166831	0.166693		263	0.196887	0.186761	0.176565
264	0.173628	0.169426	0.171992		264	0.194139	0.186568	0.175435
265	0.177275	0.16746	0.174417		265	0.190815	0.186928	0.173389
266	0.177861	0.167513	0.173946		266	0.189676	0.186652	0.172773
267	0.18023	0.167993	0.171546		267	0.187903	0.186332	0.168903
268	0.182577	0.169181	0.173344		268	0.191906	0.184211	0.168212
269	0.180989	0.170362	0.1733		269	0.192117	0.186346	0.168353
270	0.178293	0.172741	0.175064		270	0.191345	0.184441	0.168152
271	0.176668	0.175649	0.17333		271	0.190571	0.18636	0.168313
272	0.175377	0.175336	0.173858		272	0.19183	0.187657	0.169749
273	0.175963	0.172952	0.176995		273	0.188044	0.190705	0.171906
274	0.177	0.170526	0.177136		274	0.191468	0.188227	0.172219
275	0.178233	0.173211	0.17721		275	0.197063	0.189179	0.173642
276	0.179368	0.169847	0.180579		276	0.196823	0.186315	0.174004
277	0.178898	0.169704	0.179391		277	0.200873	0.184088	0.174006
278	0.177349	0.17128	0.176272		278	0.20189	0.180359	0.172489
279	0.17665	0.169681	0.177679		279	0.199169	0.180187	0.173477
280	0.174439	0.16525	0.179957		280	0.196544	0.179164	0.172671
281	0.17414	0.161946	0.179673		281	0.195767	0.178324	0.171676
282	0.174547	0.161206	0.182501		282	0.191622	0.179278	0.171573
283	0.174536	0.159684	0.185935		283	0.192568	0.179278	0.174592
284	0.1746	0.160086	0.183003		284	0.191281	0.17957	0.174896
285	0.178872	0.161473	0.183583		285	0.193991	0.179902	0.17264
286	0.178337	0.166834	0.183282		286	0.193865	0.182392	0.175797
287	0.177583	0.169167	0.185604		287	0.196761	0.180618	0.177043
288	0.178268	0.168152	0.184981		288	0.196051	0.181441	0.175341
289	0.177587	0.168384	0.190076		289	0.198245	0.183606	0.173427
290	0.174425	0.168027	0.188052		290	0.196484	0.185374	0.174686
291	0.174777	0.162879	0.188293		291	0.198736	0.185783	0.171121
292	0.17456	0.164122	0.187177		292	0.196177	0.185254	0.169692
293	0.173888	0.16462	0.186538		293	0.19635	0.187794	0.169355
294	0.172269	0.166189	0.183405		294	0.196567	0.186703	0.169877
295	0.171873	0.167606	0.180844		295	0.197354	0.185115	0.169449
296	0.173099	0.169831	0.179251		296	0.196322	0.186342	0.171921
297	0.171747	0.166377	0.180197		297	0.201218	0.189937	0.175301
298	0.171519	0.16875	0.181663		298	0.203164	0.188018	0.175014
299	0.171206	0.167261	0.18153		299	0.204593	0.187868	0.17463
300	0.172062	0.168324	0.184136		300	0.203793	0.188282	0.174819
301	0.171973	0.168632	0.184562		301	0.204501	0.187497	0.172201
302	0.171488	0.172182	0.185012		302	0.199378	0.186442	0.171382
303	0.170017	0.172086	0.182912		303	0.196408	0.184769	0.173088
304	0.170869	0.172467	0.184575		304	0.196343	0.184913	0.174175
305	0.170297	0.170765	0.185167		305	0.19573	0.185844	0.173768
306	0.170088	0.1698	0.187989		306	0.193601	0.185829	0.175262
307	0.172419	0.166534	0.18405		307	0.195439	0.185295	0.1739
308	0.174497	0.166496	0.184645		308	0.196557	0.186578	0.170431
309	0.175671	0.167368	0.184477		309	0.195425	0.185754	0.171804
310	0.176684	0.166883	0.18254		310	0.195725	0.185871	0.171513
311	0.175366	0.168906	0.180954		311	0.198205	0.18381	0.171061
312	0.176029	0.168579	0.185963		312	0.198219	0.184027	0.169276
313	0.17569	0.168552	0.183537		313	0.197806	0.186025	0.170204
314	0.173665	0.165932	0.181945		314	0.199625	0.186401	0.169878
315	0.173535	0.164354	0.183536		315	0.200421	0.185089	0.17184
316	0.174766	0.162847	0.183905		316	0.201338	0.185857	0.172523
317	0.173848	0.16597	0.180215		317	0.198942	0.184781	0.173446
318	0.171614	0.165737	0.180698		318	0.200619	0.184762	0.173617
319	0.172767	0.166393	0.179852		319	0.199323	0.185496	0.173716
320	0.171176	0.16918	0.177663		320	0.198817	0.185678	0.174673
321	0.16877	0.169646	0.179468		321	0.195228	0.186456	0.175472
322	0.170589	0.167154	0.179689		322	0.198186	0.184592	0.174384
323	0.172198	0.166096	0.181734		323	0.197492	0.181486	0.175156
324	0.173309	0.168023	0.17805		324	0.194702	0.180172	0.17546
325	0.17582	0.165056	0.179679		325	0.193105	0.181831	0.171896
326	0.176963	0.164132	0.179585		326	0.193147	0.183357	0.170378
327	0.177605	0.165737	0.180706		327	0.192354	0.18485	0.17141
328	0.177198	0.166007	0.176115		328	0.189086	0.182697	0.170898
329	0.174992	0.166281	0.179757		329	0.187614	0.181575	0.169335
330	0.172793	0.168531	0.177754		330	0.186628	0.179398	0.170398
331	0.172764	0.167592	0.173449		331	0.187659	0.17883	0.173293
332	0.170311	0.169332	0.17187		332	0.187251	0.180203	0.173927
333	0.172756	0.169764	0.176495		333	0.18775	0.182606	0.173848
334	0.174101	0.17181	0.178949		334	0.188804	0.185612	0.173383
335	0.174913	0.172482	0.179618		335	0.192145	0.186228	0.175902
336	0.175824	0.176425	0.181309		336	0.19175	0.182932	0.17245
337	0.176131	0.175734	0.181965		337	0.188924	0.180239	0.172335
338	0.175065	0.177999	0.181017		338	0.187132	0.180616	0.171084
339	0.17419	0.177534	0.179252		339	0.188206	0.179744	0.171471
340	0.173175	0.177556	0.180469		340	0.184321	0.179094	0.169379
341	0.171159	0.176791	0.177822		341	0.184578	0.18024	0.169332
342	0.170223	0.175806	0.176574		342	0.185366	0.182718	0.171091
343	0.167971	0.173123	0.175169		343	0.187547	0.184685	0.173514
344	0.169474	0.172726	0.174556		344	0.185821	0.18546	0.172416
345	0.169493	0.176564	0.174843		345	0.184359	0.186118	0.173223
346	0.170204	0.173888	0.17611		346	0.180432	0.187148	0.173721
347	0.169671	0.173793	0.174745		347	0.178413	0.187533	0.173498
348	0.170488	0.172766	0.17801		348	0.177437	0.185454	0.174943
349	0.165488	0.170692	0.177805		349	0.176402	0.183391	0.176123
350	0.166755	0.163231	0.177528		350	0.177505	0.1841	0.177336
351	0.168606	0.163257	0.178423		351	0.180511	0.182831	0.178121
352	0.167707	0.161895	0.179762		352	0.181477	0.181488	0.177389
353	0.166068	0.161178	0.177125		353	0.178343	0.180794	0.17499
354	0.170803	0.159823	0.177747		354	0.176895	0.181792	0.175047
355	0.169506	0.160425	0.177369		355	0.178871	0.178285	0.174574
356	0.167059	0.161249	0.176027		356	0.177542	0.17834	0.172913
357	0.168777	0.161884	0.17664		357	0.178551	0.178054	0.173452
358	0.16874	0.164057	0.177685		358	0.179988	0.17781	0.174445
359	0.16579	0.167294	0.176336		359	0.182893	0.177367	0.172497
360	0.166328	0.168702	0.176079		360	0.178963	0.178751	0.172903
361	0.164774	0.169986	0.177479		361	0.177353	0.179586	0.174058
362	0.164388	0.172043	0.17583		362	0.177153	0.178687	0.173799
363	0.168083	0.16959	0.173249		363	0.177271	0.178899	0.173517
364	0.170653	0.16747	0.17375		364	0.174989	0.176748	0.176669
365	0.169979	0.168963	0.175046		365	0.17555	0.178722	0.174623
366	0.174168	0.169358	0.172595		366	0.176064	0.1798	0.17413
367	0.174759	0.167005	0.174055		367	0.172388	0.180308	0.171499
368	0.172844	0.172637	0.175744		368	0.170811	0.181901	0.171438
369	0.17223	0.174532	0.176043		369	0.170323	0.183375	0.168459
370	0.173576	0.175854	0.170488		370	0.170677	0.179568	0.170103
371	0.172117	0.179669	0.1754		371	0.169997	0.176688	0.17105
372	0.17117	0.179274	0.176133		372	0.171348	0.179476	0.171752
373	0.170074	0.176529	0.177289		373	0.172575	0.177212	0.172243
374	0.170501	0.175905	0.174559		374	0.175184	0.177415	0.174165
375	0.169274	0.174956	0.17778		375	0.173658	0.180201	0.173366
376	0.168862	0.169491	0.172773		376	0.172795	0.18112	0.17224
377	0.169785	0.17006	0.170054		377	0.171399	0.179148	0.171648
378	0.170159	0.169996	0.166147		378	0.172313	0.180471	0.170859
379	0.170196	0.172616	0.167018		379	0.170849	0.181192	0.171045
380	0.170994	0.171935	0.167873		380	0.172702	0.18329	0.170504
381	0.17006	0.171736	0.172356		381	0.17305	0.182157	0.169768
382	0.169419	0.170227	0.174194		382	0.173711	0.180913	0.170322
383	0.169959	0.167185	0.175396		383	0.17211	0.18049	0.171492
384	0.169343	0.16363	0.177123		384	0.172654	0.178667	0.171054
385	0.168589	0.163982	0.178837		385	0.172165	0.176649	0.170912
386	0.169003	0.165009	0.175196		386	0.173331	0.177741	0.172118
387	0.169651	0.167639	0.174919		387	0.173224	0.176563	0.173733
388	0.17075	0.170037	0.182176		388	0.174806	0.176807	0.172877
389	0.172111	0.172192	0.180929		389	0.170804	0.177159	0.172534
390	0.170325	0.171525	0.183009		390	0.171511	0.175825	0.171253
391	0.171441	0.169881	0.185752		391	0.170074	0.174695	0.171183
392	0.173153	0.170218	0.183807		392	0.172077	0.176537	0.168754
393	0.172134	0.17141	0.179388		393	0.168816	0.175361	0.169056
394	0.173648	0.171564	0.179373		394	0.170118	0.176151	0.169015
395	0.176775	0.173871	0.173984		395	0.170358	0.177712	0.171295
396	0.177951	0.176341	0.17538		396	0.170662	0.176821	0.169839
397	0.175844	0.177476	0.175341		397	0.1718	0.177385	0.170442
398	0.177021	0.177161	0.173669		398	0.175385	0.175884	0.170448
399	0.174729	0.175967	0.172798		399	0.176213	0.177175	0.171186
400	0.175618	0.17527	0.17806		400	0.17237	0.174596	0.169755
401	0.174316	0.176015	0.174433		401	0.173168	0.175567	0.17208
402	0.175183	0.175143	0.177794		402	0.17151	0.177568	0.172786
403	0.17539	0.17542	0.180086		403	0.170591	0.180107	0.172339
404	0.177035	0.174333	0.178773		404	0.171944	0.178469	0.169425
405	0.176276	0.175313	0.175931		405	0.175802	0.178286	0.168218
406	0.179586	0.171558	0.176817		406	0.178006	0.177663	0.166589
407	0.180248	0.170477	0.175527		407	0.174881	0.176226	0.164488
408	0.181152	0.167788	0.174828		408	0.175029	0.177134	0.164132
409	0.180489	0.1667	0.179247		409	0.176166	0.178487	0.165201
410	0.183405	0.165725	0.17621		410	0.177572	0.18172	0.166592
411	0.182943	0.168513	0.175339		411	0.173683	0.182239	0.168316
412	0.183419	0.167715	0.174313		412	0.173618	0.182846	0.168934
413	0.185971	0.166834	0.174183		413	0.174638	0.184583	0.167612
414	0.188779	0.167001	0.170706		414	0.172253	0.185203	0.16621
415	0.18784	0.164592	0.171831		415	0.169231	0.185092	0.166972
416	0.188073	0.16353	0.17229		416	0.173273	0.186826	0.1654
417	0.190218	0.163499	0.175229		417	0.175808	0.188829	0.167115
418	0.188432	0.163721	0.173305		418	0.175104	0.187991	0.166865
419	0.185929	0.164395	0.176822		419	0.176305	0.187489	0.166519
420	0.183129	0.165382	0.177865		420	0.177642	0.187298	0.163838
421	0.182296	0.165109	0.17668		421	0.176089	0.188362	0.163676
422	0.179499	0.162326	0.172167		422	0.174705	0.186136	0.16119
423	0.180897	0.162572	0.172024		423	0.171538	0.187748	0.163511
424	0.180793	0.161078	0.17076		424	0.169337	0.186906	0.163173
425	0.182543	0.15831	0.170043		425	0.170327	0.18604	0.164744
426	0.181512	0.154193	0.170894		426	0.166853	0.18565	0.165909
427	0.184275	0.154824	0.171346		427	0.166897	0.186844	0.168265
428	0.181468	0.156367	0.172443		428	0.167292	0.184675	0.166381
429	0.181139	0.154892	0.170305		429	0.168768	0.185108	0.167797
430	0.181107	0.156166	0.170732		430	0.166728	0.186359	0.167846
431	0.181959	0.15926	0.171342		431	0.167721	0.187028	0.166952
432	0.180086	0.162133	0.172236		432	0.168127	0.187203	0.166111
433	0.182642	0.162711	0.171323		433	0.169961	0.185383	0.166923
434	0.184555	0.162823	0.173478		434	0.170093	0.186253	0.166845
435	0.186287	0.163277	0.173264		435	0.170609	0.185862	0.165007
436	0.184937	0.163057	0.17132		436	0.172884	0.183388	0.163423
437	0.185365	0.163048	0.172575		437	0.172814	0.18133	0.16405
438	0.184932	0.161868	0.173569		438	0.172474	0.182856	0.163393
439	0.186245	0.161517	0.173824		439	0.172728	0.179887	0.164767
440	0.186063	0.161933	0.170758		440	0.172615	0.178783	0.166569
441	0.185717	0.162329	0.171873		441	0.170548	0.18008	0.16831
442	0.186447	0.163138	0.170636		442	0.171192	0.183998	0.165178
443	0.187948	0.163149	0.16957		443	0.173798	0.181477	0.164623
444	0.188028	0.166052	0.167019		444	0.174066	0.180463	0.163235
445	0.188736	0.166539	0.167834		445	0.171758	0.180677	0.163198
446	0.191842	0.16721	0.168914		446	0.171248	0.178088	0.163533
447	0.189408	0.165274	0.168852		447	0.171	0.174305	0.165942
448	0.187658	0.165995	0.165718		448	0.169287	0.176383	0.166634
449	0.186095	0.164341	0.166581		449	0.168357	0.178823	0.168084
450	0.18531	0.160794	0.168396		450	0.169373	0.178944	0.168256
451	0.185336	0.159863	0.169908		451	0.170637	0.18154	0.16567
452	0.190218	0.159223	0.171199		452	0.169259	0.181511	0.165115
453	0.191266	0.159696	0.175932		453	0.168372	0.181331	0.166496
454	0.191052	0.16133	0.177405		454	0.169183	0.183004	0.166456
455	0.191947	0.163237	0.178874		455	0.171082	0.184507	0.166806
456	0.19135	0.162184	0.178883		456	0.171556	0.185619	0.16987
457	0.189592	0.16197	0.178236		457	0.171516	0.188523	0.168981
458	0.187529	0.161759	0.175018		458	0.171415	0.191656	0.16709
459	0.186218	0.162898	0.174617		459	0.171056	0.193149	0.167698
460	0.187399	0.162591	0.172362		460	0.168045	0.191956	0.166411
461	0.186467	0.162224	0.172024		461	0.168032	0.190881	0.167082
462	0.188736	0.164106	0.171777		462	0.170599	0.18695	0.167236
463	0.190983	0.162375	0.173214		463	0.170928	0.184903	0.166853
464	0.19299	0.160027	0.173878		464	0.170217	0.181462	0.166075
465	0.19162	0.160042	0.176675		465	0.170966	0.182883	0.16641
466	0.193435	0.160949	0.176917		466	0.170146	0.183521	0.165191
467	0.191775	0.159401	0.177407		467	0.169824	0.185816	0.166237
468	0.191237	0.158452	0.176803		468	0.168639	0.185062	0.166382
469	0.189814	0.158296	0.175373		469	0.169787	0.184837	0.164181
470	0.191467	0.157748	0.172889		470	0.171729	0.182255	0.163386
471	0.190985	0.155145	0.172825		471	0.172203	0.18358	0.16305
472	0.187975	0.155429	0.167957		472	0.170923	0.182388	0.162614
473	0.186196	0.157809	0.168173		473	0.171578	0.18218	0.163134
474	0.189189	0.156383	0.168752		474	0.170442	0.182358	0.165065
475	0.186297	0.155813	0.172043		475	0.169995	0.183032	0.168214
476	0.186309	0.157699	0.172387		476	0.169695	0.180518	0.166651
477	0.188676	0.158146	0.176356		477	0.169968	0.179859	0.165421
478	0.189308	0.155989	0.174793		478	0.171358	0.184471	0.165182
479	0.184783	0.158209	0.173524		479	0.171281	0.188099	0.165063
480	0.184173	0.161282	0.17023		480	0.173244	0.189508	0.164149
481	0.183537	0.165611	0.167597		481	0.176979	0.191745	0.16433
482	0.181965	0.165114	0.166173		482	0.17754	0.195182	0.16468
483	0.179153	0.167015	0.169745		483	0.173835	0.193184	0.165278
484	0.182794	0.164601	0.168327		484	0.175654	0.194554	0.166113
485	0.185298	0.161198	0.166372		485	0.171675	0.200993	0.164885
486	0.186906	0.157164	0.165967		486	0.169403	0.204054	0.167831
487	0.187765	0.15852	0.167142		487	0.17009	0.205867	0.166911
488	0.190421	0.156522	0.162987		488	0.175751	0.207596	0.167966
489	0.191834	0.159297	0.165857		489	0.178326	0.208701	0.165277
490	0.190371	0.161721	0.170597		490	0.180985	0.206031	0.166542
491	0.189219	0.161582	0.173053		491	0.183716	0.20684	0.16504
492	0.190349	0.160524	0.174732		492	0.184521	0.208146	0.168082
493	0.192326	0.159731	0.177387		493	0.183149	0.208946	0.167646
494	0.189789	0.161673	0.174856		494	0.182393	0.208255	0.169145
495	0.1931	0.160085	0.171928		495	0.184399	0.211972	0.166294
496	0.1956	0.162329	0.169515		496	0.184982	0.215591	0.16632
497	0.196646	0.161855	0.170965		497	0.185806	0.214135	0.163795
498	0.199977	0.163524	0.171381		498	0.187387	0.215115	0.160288
499	0.203394	0.162052	0.173066		499	0.188263	0.217813	0.158484
500	0.201871	0.162809	0.172804		500	0.18927	0.215497	0.158998
501	0.200531	0.162576	0.176261		501	0.188808	0.214651	0.158567
502	0.199995	0.159929	0.175319		502	0.190895	0.21884	0.158346
503	0.196079	0.159519	0.176743		503	0.190732	0.221777	0.161239
504	0.194861	0.156382	0.178835		504	0.191111	0.221629	0.163952
505	0.194108	0.157661	0.179422		505	0.191805	0.219831	0.164497
506	0.195018	0.155184	0.176883		506	0.193983	0.219973	0.163423
507	0.19678	0.159021	0.173725		507	0.194352	0.218594	0.163895
508	0.196434	0.159761	0.173383		508	0.194456	0.219423	0.163213
509	0.199535	0.160824	0.170567		509	0.1959	0.222616	0.15984
510	0.200291	0.160665	0.170821		510	0.194705	0.227541	0.15996
511	0.201425	0.160075	0.170894		511	0.193272	0.228246	0.161405
512	0.198606	0.160533	0.170973		512	0.190621	0.231146	0.1623
513	0.201594	0.164422	0.168692		513	0.19091	0.231842	0.162495
514	0.199643	0.16504	0.16917		514	0.189851	0.232555	0.166086
515	0.2011	0.16158	0.167769		515	0.189722	0.238028	0.166822
516	0.202862	0.162912	0.166675		516	0.191306	0.240548	0.164138
517	0.206817	0.161296	0.168966		517	0.191717	0.245725	0.165355
518	0.206462	0.156154	0.169466		518	0.193991	0.247887	0.163977
519	0.206792	0.159117	0.1717		519	0.194276	0.247013	0.162569
520	0.207198	0.160934	0.171415		520	0.197196	0.250247	0.161688
521	0.206032	0.164603	0.172735		521	0.197254	0.25328	0.161928
522	0.206233	0.161517	0.170873		522	0.197702	0.255684	0.160134
523	0.207502	0.163136	0.169577		523	0.196518	0.254982	0.160896
524	0.204826	0.159452	0.167195		524	0.193303	0.257128	0.159842
525	0.203395	0.159905	0.166699		525	0.189313	0.25361	0.159079
526	0.20361	0.155198	0.168428		526	0.188635	0.254975	0.158931
527	0.202856	0.161367	0.167971		527	0.187644	0.25327	0.159747
528	0.205484	0.1608	0.168556		528	0.18699	0.254384	0.161302
529	0.209245	0.159981	0.169812		529	0.189706	0.259767	0.158618
530	0.213406	0.157934	0.17118		530	0.191048	0.263871	0.159679
531	0.214256	0.157344	0.168003		531	0.189026	0.26645	0.159714
532	0.216301	0.152741	0.16923		532	0.18964	0.2672	0.159901
533	0.216066	0.152527	0.169892		533	0.191889	0.274094	0.157346
534	0.215553	0.15304	0.167856		534	0.192557	0.274148	0.161859
535	0.214832	0.155801	0.170431		535	0.192775	0.272972	0.162475
536	0.215843	0.156293	0.17123		536	0.193778	0.27197	0.1648
537	0.21631	0.156098	0.171364		537	0.194099	0.270601	0.164977
538	0.214593	0.155927	0.176692		538	0.192626	0.268776	0.167182
539	0.217539	0.157452	0.178308		539	0.190504	0.269008	0.16408
540	0.218485	0.156199	0.181196		540	0.18774	0.26879	0.164148
541	0.220145	0.15832	0.182994		541	0.186599	0.268073	0.163256
542	0.218481	0.158662	0.183738		542	0.186163	0.269654	0.163001
543	0.221141	0.15783	0.178403		543	0.183865	0.27042	0.159393
544	0.223188	0.15549	0.177176		544	0.186509	0.270415	0.160579
545	0.223363	0.153341	0.172636		545	0.188379	0.2738	0.159225
546	0.22556	0.151979	0.167564		546	0.187062	0.271227	0.161603
547	0.232147	0.153042	0.165001		547	0.187357	0.280257	0.159517
548	0.232082	0.151509	0.164746		548	0.18905	0.278147	0.162126
549	0.231951	0.15056	0.166649		549	0.18562	0.277604	0.163852
550	0.234054	0.151951	0.166772		550	0.185587	0.274318	0.165807
551	0.236163	0.151276	0.17372		551	0.187548	0.274453	0.162985
552	0.237983	0.152763	0.176557		552	0.188752	0.268438	0.166005
553	0.241684	0.153929	0.174331		553	0.189018	0.271842	0.167481
554	0.245702	0.153814	0.175216		554	0.190149	0.272275	0.170064
555	0.252576	0.15483	0.176668		555	0.192966	0.275387	0.168579
556	0.256248	0.155845	0.173523		556	0.194309	0.280268	0.169178
557	0.259578	0.154603	0.175703		557	0.194123	0.280233	0.168389
558	0.266604	0.15407	0.179771		558	0.193901	0.273246	0.167894
559	0.274868	0.154787	0.181109		559	0.194903	0.272346	0.162922
560	0.280071	0.154174	0.17887		560	0.194444	0.273045	0.164423
561	0.283104	0.152248	0.178577		561	0.193134	0.273173	0.165025
562	0.286108	0.151475	0.172973		562	0.196961	0.26956	0.16337
563	0.289043	0.15277	0.168453		563	0.198606	0.270513	0.163355
564	0.287981	0.154027	0.162086		564	0.199327	0.270206	0.165777
565	0.287357	0.153051	0.159943		565	0.20148	0.27105	0.163967
566	0.289322	0.155731	0.160309		566	0.2034	0.265831	0.16348
567	0.291833	0.157745	0.161961		567	0.202203	0.265277	0.164816
568	0.288791	0.159843	0.163755		568	0.20189	0.268711	0.164569
569	0.290134	0.160422	0.16538		569	0.204173	0.266476	0.164259
570	0.291341	0.162662	0.1683		570	0.201839	0.262325	0.163631
571	0.291985	0.163788	0.166696		571	0.20378	0.264743	0.163248
572	0.291008	0.16277	0.165637		572	0.202171	0.260211	0.165262
573	0.293702	0.161333	0.1668		573	0.201296	0.26056	0.16442
574	0.289779	0.162188	0.167133		574	0.198241	0.263975	0.165042
575	0.28597	0.162883	0.163317		575	0.196764	0.264126	0.165796
576	0.285095	0.161583	0.161697		576	0.194682	0.263898	0.166764
577	0.285745	0.160955	0.164611		577	0.194805	0.267084	0.165936
578	0.28291	0.160717	0.165629		578	0.196535	0.26396	0.166881
579	0.283144	0.15997	0.166672		579	0.196626	0.262756	0.166987
580	0.2868	0.160595	0.168564		580	0.196611	0.255731	0.167797
581	0.284796	0.160823	0.170863		581	0.19695	0.254533	0.168
582	0.281779	0.161647	0.167383		582	0.192658	0.255487	0.165189
583	0.283568	0.162521	0.165535		583	0.191209	0.25687	0.163732
584	0.284756	0.162725	0.168864		584	0.193135	0.260399	0.16257
585	0.283417	0.162614	0.171682		585	0.194239	0.265365	0.161842
586	0.287221	0.166078	0.172789		586	0.195242	0.262574	0.161079
587	0.28826	0.167994	0.175118		587	0.196865	0.262864	0.1599
588	0.289386	0.169115	0.175657		588	0.195515	0.261611	0.159229
589	0.293762	0.168644	0.173753		589	0.190853	0.254733	0.158921
590	0.297814	0.167941	0.170866		590	0.191339	0.252076	0.160942
591	0.295842	0.164165	0.168427		591	0.188143	0.25146	0.160813
592	0.300259	0.162762	0.165948		592	0.18825	0.246023	0.163776
593	0.304645	0.161892	0.166026		593	0.188462	0.242504	0.164654
594	0.305721	0.163136	0.162857		594	0.193922	0.238299	0.166578
595	0.30736	0.16321	0.16333		595	0.191848	0.236027	0.16373
596	0.315541	0.162256	0.161564		596	0.191493	0.235849	0.163992
597	0.316969	0.162923	0.165388		597	0.19182	0.236855	0.162404
598	0.318115	0.160488	0.166916		598	0.196546	0.237933	0.16384
599	0.317009	0.160405	0.171282		599	0.194531	0.241116	0.161339
600	0.319856	0.16164	0.171149		600	0.195857	0.243538	0.162278
601	0.316213	0.163586	0.173508		601	0.197388	0.2432	0.163191
602	0.317592	0.162391	0.172077		602	0.2003	0.242214	0.165408
603	0.31801	0.165261	0.171769		603	0.196066	0.242758	0.167627
604	0.323533	0.164627	0.168665		604	0.195473	0.243268	0.169926
605	0.321979	0.161677	0.168124		605	0.196234	0.243314	0.169882
606	0.322111	0.160512	0.168056		606	0.19403	0.246949	0.16972
607	0.31921	0.162195	0.16958		607	0.190142	0.249111	0.16745
608	0.326884	0.160202	0.166939		608	0.191632	0.250762	0.165828
609	0.327332	0.16073	0.16933		609	0.190044	0.250711	0.167532
610	0.331332	0.160439	0.170276		610	0.190572	0.248071	0.169356
611	0.336675	0.159259	0.169991		611	0.191021	0.247114	0.169943
612	0.336258	0.157855	0.168717		612	0.192453	0.246454	0.174828
613	0.325138	0.159141	0.168987		613	0.192886	0.243989	0.174932
614	0.322602	0.160575	0.166139		614	0.192924	0.241954	0.172083
615	0.318471	0.162521	0.167542		615	0.192204	0.242766	0.171861
616	0.315487	0.165156	0.166679		616	0.193152	0.243103	0.171224
617	0.317319	0.164599	0.164129		617	0.194395	0.241786	0.168342
618	0.32076	0.162444	0.166114		618	0.192244	0.245095	0.166821
619	0.318822	0.162939	0.16795		619	0.192504	0.248451	0.167193
620	0.31602	0.164549	0.168521		620	0.191132	0.250093	0.169903
621	0.314671	0.16456	0.173905		621	0.191152	0.248243	0.17044
622	0.313974	0.16341	0.174264		622	0.192621	0.250415	0.170338
623	0.309913	0.165966	0.172684		623	0.194989	0.249941	0.171186
624	0.310453	0.163447	0.170618		624	0.195945	0.248743	0.172552
625	0.307513	0.163288	0.170713		625	0.197525	0.252274	0.168274
626	0.303626	0.161946	0.168151		626	0.197935	0.254933	0.167235
627	0.29976	0.162923	0.17086		627	0.195753	0.259545	0.166947
628	0.296795	0.164534	0.17093		628	0.194399	0.263047	0.16572
629	0.291067	0.164634	0.172094		629	0.19532	0.265421	0.163846
630	0.29229	0.16153	0.174046		630	0.194894	0.264503	0.165343
631	0.29097	0.163229	0.175517		631	0.195206	0.26426	0.165571
632	0.292897	0.164361	0.173308		632	0.195497	0.260666	0.164315
633	0.292797	0.160166	0.1742		633	0.196465	0.256454	0.166827
634	0.291786	0.162563	0.173572		634	0.196353	0.256012	0.167827
635	0.290299	0.164181	0.169939		635	0.196758	0.257625	0.167143
636	0.287982	0.161255	0.168647		636	0.199087	0.261642	0.167271
637	0.284223	0.160608	0.171578		637	0.202112	0.26578	0.167314
638	0.281572	0.161674	0.173265		638	0.201293	0.265763	0.166083
639	0.280885	0.158734	0.172463		639	0.200298	0.270044	0.166058
640	0.27695	0.159578	0.175477		640	0.201658	0.270322	0.166667
641	0.274678	0.160299	0.176648		641	0.200321	0.269412	0.167186
642	0.271439	0.157931	0.173049		642	0.197257	0.271514	0.167979
643	0.270412	0.156356	0.17371		643	0.195866	0.278327	0.170072
644	0.27066	0.154475	0.175742		644	0.197709	0.281588	0.169584
645	0.268627	0.1525	0.17519		645	0.197946	0.284156	0.168695
646	0.26563	0.152386	0.173165		646	0.197223	0.286254	0.167514
647	0.265709	0.155128	0.174888		647	0.195466	0.28701	0.166639
648	0.267355	0.157126	0.173079		648	0.199426	0.287143	0.164133
649	0.265193	0.16165	0.175537		649	0.200275	0.285465	0.163214
650	0.265417	0.162825	0.172036		650	0.199787	0.290047	0.164168
651	0.268102	0.162958	0.171909		651	0.200067	0.294758	0.165199
652	0.267169	0.159012	0.17109		652	0.204305	0.299257	0.166924
653	0.262353	0.157187	0.171448		653	0.206016	0.306237	0.16661
654	0.259421	0.154711	0.168551		654	0.204484	0.310976	0.168604
655	0.257959	0.154009	0.168739		655	0.204445	0.315677	0.168267
656	0.255215	0.156936	0.169252		656	0.207593	0.312477	0.167164
657	0.25314	0.160284	0.171519		657	0.206834	0.311624	0.166385
658	0.253806	0.161563	0.16965		658	0.203917	0.308116	0.166834
659	0.253764	0.162216	0.172444		659	0.203337	0.307271	0.165201
660	0.25338	0.160962	0.17275		660	0.199449	0.306901	0.165635
661	0.253622	0.159707	0.171238		661	0.196807	0.313965	0.165785
662	0.251906	0.160742	0.169397		662	0.198476	0.315949	0.165765
663	0.247921	0.162403	0.170398		663	0.201048	0.312812	0.164472
664	0.246433	0.162737	0.170393		664	0.201786	0.308891	0.165373
665	0.243271	0.165818	0.174026		665	0.208067	0.306745	0.16479
666	0.240746	0.16644	0.175002		666	0.20825	0.305794	0.167053
667	0.243513	0.163166	0.176655		667	0.209986	0.307647	0.166617
668	0.246394	0.161298	0.180169		668	0.210052	0.312307	0.168009
669	0.245418	0.160911	0.179387		669	0.215015	0.320458	0.167336
670	0.247273	0.158025	0.177703		670	0.217467	0.321054	0.168411
671	0.247925	0.157202	0.181959		671	0.220799	0.318157	0.167671
672	0.248365	0.157874	0.177945		672	0.22278	0.320453	0.168421
673	0.249655	0.158968	0.17454		673	0.224192	0.322086	0.169906
674	0.252906	0.157752	0.176263		674	0.229679	0.322234	0.170118
675	0.252761	0.160529	0.177663		675	0.233686	0.323547	0.169062
676	0.255243	0.161554	0.17522		676	0.241137	0.328809	0.167691
677	0.253414	0.162629	0.184123		677	0.244028	0.324275	0.167746
678	0.255245	0.163103	0.185934		678	0.253325	0.327806	0.167371
679	0.256914	0.164518	0.186636		679	0.255858	0.33231	0.167265
680	0.264429	0.161936	0.185612		680	0.263497	0.335904	0.166683
681	0.269421	0.159878	0.190453		681	0.2731	0.333168	0.167246
682	0.273659	0.161268	0.191027		682	0.289559	0.339302	0.168492
683	0.273959	0.160025	0.192415		683	0.303955	0.337172	0.167403
684	0.279224	0.160837	0.192487		684	0.323077	0.333799	0.165339
685	0.275517	0.159962	0.197962		685	0.343268	0.335172	0.167189
686	0.27384	0.157869	0.200651		686	0.360149	0.338247	0.169119
687	0.277287	0.156305	0.199709		687	0.37672	0.335128	0.168259
688	0.279191	0.157539	0.202735		688	0.387376	0.335626	0.171932
689	0.282352	0.158232	0.205748		689	0.39566	0.334244	0.178065
690	0.286928	0.162879	0.203494		690	0.39676	0.328501	0.177027
691	0.287937	0.164981	0.204526		691	0.400863	0.328957	0.176418
692	0.286842	0.164531	0.211648		692	0.397058	0.328252	0.175898
693	0.288685	0.164449	0.218258		693	0.394369	0.323848	0.173333
694	0.287669	0.165318	0.221076		694	0.390966	0.323377	0.171237
695	0.290935	0.162287	0.228021		695	0.390741	0.319116	0.172778
696	0.295489	0.161862	0.226656		696	0.387548	0.313372	0.173193
697	0.298079	0.163695	0.224422		697	0.391708	0.318701	0.173585
698	0.302249	0.16568	0.221278		698	0.393439	0.324647	0.173203
699	0.302961	0.164049	0.220087		699	0.387703	0.322969	0.171043
700	0.303113	0.166666	0.214352		700	0.388097	0.326991	0.17073
701	0.304788	0.166524	0.216094		701	0.384105	0.328767	0.169862
702	0.309349	0.165758	0.215233		702	0.371271	0.327623	0.171342
703	0.30857	0.163684	0.22227		703	0.368913	0.330374	0.172889
704	0.310351	0.164212	0.228514		704	0.373848	0.335665	0.176513
705	0.312821	0.163537	0.236238		705	0.372202	0.338308	0.176292
706	0.311818	0.164937	0.239427		706	0.369875	0.345446	0.177395
707	0.309399	0.163893	0.242165		707	0.36994	0.34313	0.180167
708	0.310165	0.163294	0.241931		708	0.362463	0.343574	0.180545
709	0.30706	0.163017	0.246932		709	0.357909	0.346202	0.180593
710	0.305897	0.16154	0.248141		710	0.35343	0.352816	0.182413
711	0.306695	0.162748	0.251646		711	0.348277	0.355587	0.183915
712	0.305627	0.164863	0.253849		712	0.34888	0.356933	0.183173
713	0.30855	0.165979	0.253943		713	0.345396	0.356134	0.18376
714	0.311542	0.164903	0.249841		714	0.342708	0.355946	0.183311
715	0.316705	0.164764	0.253714		715	0.339536	0.3538	0.183214
716	0.321586	0.166111	0.256526		716	0.336921	0.355283	0.183368
717	0.333027	0.169486	0.263016		717	0.332815	0.361866	0.183644
718	0.33617	0.170871	0.263466		718	0.336154	0.367587	0.183266
719	0.350328	0.170363	0.264424		719	0.334612	0.367388	0.182153
720	0.354204	0.169768	0.266138		720	0.325638	0.367623	0.184162
721	0.360618	0.168053	0.267909		721	0.324931	0.366802	0.185067
722	0.363773	0.165514	0.266793		722	0.322728	0.367632	0.185664
723	0.371071	0.164967	0.26913		723	0.316458	0.364042	0.186265
724	0.36955	0.165756	0.274423		724	0.311713	0.372652	0.19043
725	0.37256	0.167677	0.279826		725	0.316284	0.375519	0.191522
726	0.374326	0.170739	0.281486		726	0.316562	0.37704	0.195295
727	0.37811	0.170278	0.289029		727	0.31453	0.375042	0.200075
728	0.378777	0.170236	0.299555		728	0.31334	0.380326	0.20497
729	0.381731	0.172279	0.307573		729	0.311276	0.376034	0.208045
730	0.384241	0.17252	0.304544		730	0.306097	0.379871	0.212385
731	0.383348	0.171116	0.310751		731	0.29967	0.381712	0.215252
732	0.381674	0.170816	0.309471		732	0.299579	0.384415	0.21924
733	0.38904	0.169149	0.307442		733	0.297522	0.389667	0.22146
734	0.38703	0.169419	0.308399		734	0.293334	0.39337	0.226577
735	0.390654	0.172207	0.319063		735	0.290896	0.398439	0.232497
736	0.390563	0.171403	0.324051		736	0.287154	0.406105	0.235772
737	0.388519	0.170599	0.334396		737	0.282567	0.411739	0.23897
738	0.382232	0.174218	0.338688		738	0.276591	0.411724	0.248661
739	0.380599	0.173156	0.345038		739	0.276574	0.418562	0.25273
740	0.373956	0.170471	0.349197		740	0.272944	0.425393	0.255357
741	0.377414	0.171913	0.354812		741	0.272759	0.423152	0.262136
742	0.379889	0.175476	0.366149		742	0.2698	0.424691	0.266477
743	0.37772	0.172646	0.382496		743	0.268108	0.423858	0.268439
744	0.374584	0.174839	0.399251		744	0.265263	0.425178	0.273925
745	0.372159	0.176094	0.403657		745	0.260791	0.424627	0.28061
746	0.36893	0.177517	0.411099		746	0.261394	0.42396	0.285548
747	0.362704	0.174438	0.409289		747	0.257488	0.425531	0.290179
748	0.362342	0.176467	0.406348		748	0.258545	0.428326	0.29578
749	0.359229	0.176458	0.392833		749	0.258509	0.429871	0.30163
750	0.362056	0.178323	0.398092		750	0.257956	0.42466	0.311036
751	0.357406	0.176274	0.396815		751	0.254015	0.425116	0.321877
752	0.357009	0.179262	0.397898		752	0.25581	0.423636	0.336848
753	0.351563	0.180771	0.396326		753	0.255413	0.42172	0.350911
754	0.353626	0.184139	0.408995		754	0.252986	0.408399	0.364988
755	0.346995	0.184139	0.400585		755	0.257159	0.404338	0.367822
756	0.347445	0.187417	0.393769		756	0.257529	0.397368	0.37491
757	0.345929	0.186807	0.390968		757	0.259343	0.394703	0.376134
758	0.345205	0.186361	0.387892		758	0.258644	0.391632	0.374662
759	0.343429	0.185616	0.376842		759	0.261598	0.391843	0.370157
760	0.346475	0.187483	0.375945		760	0.262559	0.387361	0.372584
761	0.346826	0.188374	0.374346		761	0.264194	0.386836	0.367512
762	0.347458	0.192623	0.365218		762	0.264998	0.37799	0.36758
763	0.348171	0.195136	0.361669		763	0.267597	0.370085	0.36473
764	0.350883	0.195506	0.357648		764	0.264816	0.366357	0.364992
765	0.348575	0.195416	0.3605		765	0.265021	0.36092	0.36546
766	0.347749	0.19588	0.356949		766	0.263522	0.358399	0.369716
767	0.345595	0.197784	0.353378		767	0.26105	0.356462	0.371121
768	0.343427	0.200211	0.34886		768	0.260964	0.360501	0.372156
769	0.338972	0.20529	0.346415		769	0.263978	0.359036	0.373996
770	0.335595	0.209542	0.338219		770	0.259431	0.352217	0.374399
771	0.33261	0.214359	0.333761		771	0.259292	0.344174	0.367339
772	0.327556	0.21509	0.326573		772	0.259124	0.34164	0.36265
773	0.323855	0.219322	0.319014		773	0.25548	0.335973	0.362783
774	0.32262	0.223792	0.311357		774	0.249777	0.333395	0.358371
775	0.324173	0.227107	0.308294		775	0.25044	0.331629	0.355799
776	0.319402	0.22895	0.305352		776	0.252256	0.331722	0.352241
777	0.318038	0.234945	0.30587		777	0.252369	0.329468	0.348753
778	0.32175	0.236064	0.308685		778	0.250697	0.321854	0.352199
779	0.321134	0.236024	0.302683		779	0.252313	0.31889	0.35248
780	0.320737	0.236434	0.292534		780	0.249781	0.315995	0.348963
781	0.322558	0.239021	0.285381		781	0.248887	0.311529	0.35231
782	0.324642	0.240696	0.281733		782	0.245598	0.303428	0.35131
783	0.322238	0.24668	0.275297		783	0.247121	0.297401	0.344065
784	0.320447	0.251289	0.270319		784	0.245155	0.287756	0.340693
785	0.317738	0.26314	0.27318		785	0.247348	0.286437	0.341789
786	0.317448	0.272519	0.271443		786	0.243815	0.281247	0.340598
787	0.316788	0.284743	0.261575		787	0.241149	0.280157	0.338106
788	0.31549	0.29144	0.257614		788	0.239479	0.276417	0.334434
789	0.320384	0.303308	0.257463		789	0.241776	0.279573	0.334363
790	0.32092	0.306523	0.250302		790	0.241825	0.275197	0.333382
791	0.318788	0.313582	0.245355		791	0.24247	0.272263	0.333062
792	0.316614	0.311846	0.253321		792	0.242451	0.271185	0.333724
793	0.31898	0.321335	0.247519		793	0.240138	0.271514	0.332744
794	0.310827	0.317931	0.248303		794	0.236831	0.266328	0.330522
795	0.308118	0.318232	0.251541		795	0.231379	0.265697	0.326891
796	0.306839	0.317456	0.248636		796	0.228795	0.263557	0.325307
797	0.313453	0.320231	0.244065		797	0.230417	0.260318	0.328969
798	0.309431	0.31735	0.247785		798	0.227694	0.256753	0.331654
799	0.30974	0.322535	0.243277		799	0.22715	0.252247	0.334211
800	0.310052	0.326494	0.238977		800	0.228814	0.247693	0.33662
801	0.31278	0.33426	0.244596		801	0.227159	0.246706	0.330003
802	0.303434	0.338692	0.246004		802	0.227118	0.246534	0.329154
803	0.303444	0.342774	0.246837		803	0.229563	0.248997	0.32695
804	0.299045	0.350362	0.253674		804	0.231051	0.248289	0.32344
805	0.296734	0.363999	0.258359		805	0.230369	0.248554	0.31908
806	0.294702	0.364768	0.259022		806	0.230405	0.249127	0.322359
807	0.297625	0.367552	0.254323		807	0.227594	0.244749	0.315762
808	0.294663	0.374395	0.252004		808	0.230496	0.241229	0.315923
809	0.29834	0.376108	0.248826		809	0.225489	0.24309	0.312668
810	0.297809	0.375175	0.24817		810	0.227821	0.24275	0.310886
811	0.295869	0.372512	0.242771		811	0.226791	0.238802	0.313801
812	0.292924	0.377993	0.241163		812	0.22413	0.238204	0.314764
813	0.292764	0.372095	0.239146		813	0.218864	0.236521	0.308898
814	0.291587	0.369177	0.238622		814	0.220037	0.235023	0.305229
815	0.291354	0.36416	0.2286		815	0.215435	0.234492	0.306074
816	0.290711	0.368475	0.2327		816	0.213738	0.23422	0.301204
817	0.290723	0.37089	0.232744		817	0.215808	0.234172	0.300558
818	0.290147	0.367384	0.231511		818	0.216311	0.234074	0.299928
819	0.288642	0.360977	0.225683		819	0.214848	0.230101	0.296554
820	0.290311	0.354555	0.233193		820	0.214036	0.22775	0.293369
821	0.289756	0.351799	0.228928		821	0.21446	0.224883	0.289525
822	0.290202	0.34158	0.229436		822	0.211852	0.224053	0.2865
823	0.292045	0.351808	0.227495		823	0.210762	0.220858	0.28592
824	0.292376	0.363195	0.223608		824	0.207319	0.221299	0.286456
825	0.290127	0.365973	0.220318		825	0.208187	0.221211	0.280356
826	0.288841	0.362455	0.218959		826	0.207737	0.222495	0.278719
827	0.287449	0.365922	0.218879		827	0.209458	0.219647	0.27258
828	0.288836	0.364276	0.22573		828	0.206775	0.221692	0.266706
829	0.288201	0.357456	0.230852		829	0.207121	0.220409	0.263027
830	0.28614	0.35819	0.227596		830	0.203895	0.217537	0.265476
831	0.286564	0.355697	0.229717		831	0.202207	0.214628	0.261313
832	0.28713	0.354203	0.231462		832	0.200002	0.213955	0.26047
833	0.283049	0.35048	0.225042		833	0.200059	0.210742	0.258678
834	0.285783	0.351391	0.226874		834	0.201927	0.211157	0.261047
835	0.286289	0.344554	0.225325		835	0.201114	0.209569	0.257811
836	0.289947	0.348438	0.222799		836	0.201805	0.207402	0.252745
837	0.293117	0.349692	0.217951		837	0.199418	0.205612	0.249255
838	0.292356	0.344126	0.21614		838	0.19455	0.204276	0.249026
839	0.290492	0.341646	0.210376		839	0.191894	0.204953	0.24189
840	0.28916	0.348784	0.212286		840	0.191805	0.2067	0.236979
841	0.282171	0.347087	0.215319		841	0.188767	0.210209	0.23856
842	0.276428	0.340727	0.215765		842	0.18666	0.215592	0.232818
843	0.273122	0.344474	0.218889		843	0.190011	0.215121	0.22878
844	0.270546	0.338131	0.220269		844	0.188808	0.211237	0.22827
845	0.266788	0.334968	0.218547		845	0.189178	0.209822	0.23006
846	0.265387	0.327587	0.214422		846	0.190279	0.208173	0.227865
847	0.263654	0.327189	0.214537		847	0.192973	0.203928	0.230045
848	0.265539	0.326426	0.208913		848	0.193111	0.203054	0.228883
849	0.260898	0.329376	0.202636		849	0.193465	0.204911	0.227059
850	0.26124	0.326324	0.20223		850	0.195152	0.202564	0.222751
851	0.263038	0.326672	0.203077		851	0.193057	0.203094	0.222857
852	0.258081	0.323048	0.203195		852	0.194924	0.204028	0.223662
853	0.257608	0.317131	0.203618		853	0.196139	0.20702	0.225076
854	0.260574	0.309553	0.206773		854	0.198328	0.206871	0.224749
855	0.261584	0.30461	0.206969		855	0.194582	0.209523	0.223761
856	0.261801	0.307085	0.20301		856	0.199224	0.208582	0.221389
857	0.266388	0.306214	0.20015		857	0.200803	0.207593	0.21908
858	0.266168	0.300493	0.203049		858	0.203141	0.206653	0.219404
859	0.263637	0.300243	0.207049		859	0.20484	0.207108	0.21966
860	0.262336	0.295654	0.209401		860	0.209859	0.207325	0.220325
861	0.259815	0.283325	0.211683		861	0.211463	0.208133	0.220832
862	0.258974	0.277531	0.211302		862	0.210911	0.208852	0.218509
863	0.256634	0.273368	0.209763		863	0.211078	0.208167	0.215517
864	0.25676	0.268458	0.204204		864	0.212112	0.205356	0.215318
865	0.255915	0.262024	0.199372		865	0.212143	0.205445	0.215689
866	0.254849	0.265552	0.19841		866	0.211836	0.203116	0.214756
867	0.254812	0.26121	0.198071		867	0.211889	0.203702	0.221131
868	0.25199	0.258392	0.197276		868	0.211964	0.198606	0.219678
869	0.251189	0.255781	0.202234		869	0.215519	0.197086	0.21846
870	0.251528	0.254507	0.205998		870	0.217369	0.194509	0.216589
871	0.249569	0.243863	0.207412		871	0.215765	0.194881	0.216421
872	0.248757	0.23838	0.211153		872	0.216608	0.192215	0.209925
873	0.254593	0.232186	0.213085		873	0.216716	0.195581	0.209429
874	0.254748	0.225807	0.210188		874	0.214506	0.195986	0.209665
875	0.254729	0.226309	0.210455		875	0.215998	0.198297	0.209971
876	0.258438	0.224593	0.206944		876	0.219132	0.196072	0.208581
877	0.259491	0.225467	0.206378		877	0.223626	0.194987	0.207352
878	0.255058	0.224906	0.20622		878	0.226372	0.193186	0.208371
879	0.257491	0.223197	0.207754		879	0.226663	0.192806	0.206718
880	0.257613	0.222581	0.204009		880	0.225957	0.192024	0.2044
881	0.255634	0.224079	0.209543		881	0.224946	0.193487	0.202254
882	0.254259	0.219831	0.211395		882	0.222678	0.192534	0.203079
883	0.254432	0.219676	0.208584		883	0.223376	0.190673	0.200341
884	0.254386	0.219154	0.206277		884	0.221909	0.192324	0.201508
885	0.253163	0.215542	0.206812		885	0.221022	0.191243	0.19877
886	0.250988	0.212543	0.203312		886	0.22188	0.191343	0.198839
887	0.246687	0.212985	0.199273		887	0.224005	0.191516	0.197191
888	0.24637	0.211598	0.201209		888	0.223826	0.19233	0.199338
889	0.244238	0.208596	0.200109		889	0.226896	0.189259	0.19551
890	0.244403	0.207377	0.198865		890	0.229199	0.189481	0.196577
891	0.245714	0.207267	0.198702		891	0.232091	0.189051	0.196559
892	0.247152	0.205626	0.198828		892	0.231294	0.189505	0.197945
893	0.248836	0.202618	0.199079		893	0.232907	0.190819	0.195338
894	0.249445	0.206203	0.199817		894	0.233374	0.191314	0.197764
895	0.249006	0.204724	0.197465		895	0.233654	0.191576	0.196523
896	0.248654	0.203255	0.195907		896	0.23185	0.191595	0.196812
897	0.247328	0.20459	0.199876		897	0.233329	0.190743	0.197794
898	0.243798	0.2044	0.197721		898	0.236231	0.192144	0.197353
899	0.240717	0.200991	0.198824		899	0.238377	0.191316	0.194975
900	0.240461	0.19905	0.202914		900	0.240007	0.188149	0.194257

## Sheet: graph
Figure5B
Fluctuation-positive cells (%)					Fluctuation amplitude (ΔF340/F380)
Npr2fl/fl, Col2a1-Cre-/-		Npr2fl/fl, Col2a1-Cre+/-			Npr2fl/fl, Col2a1-Cre-/-		Npr2fl/fl, Col2a1-Cre+/-
Basal	+NNC550396	Basal	+NNC550396		Basal	+NNC550396	Basal	+NNC550396
23.3333	80	20	60		0.0407739	0.133332	0.0422979	0.139646
30	63.3333	30	76.6667		0.0419894	0.170071	0.0310603	0.138971
16.6667	70	23.3333	70		0.0376645	0.10965	0.0602994	0.114827
23.3333	66.6667	30	60		0.0451681	0.115491	0.0376178	0.152312
