# Supplementary material for: C-type natriuretic peptide facilitates autonomic Ca2+ entry in growth plate chondrocytes for stimulating bone growth
Source: eLife. 2022 Mar 15;11:e71931. doi: 10.7554/eLife.71931 (PMC8923661; doi:10.7554/eLife.71931)
Supplement: Figure 6—source data 2. [file elife-71931-fig6-data2.xlsx]

## Sheet: 6B
Figure6B
pCaMKII		CaMKII		GAPDH
Vehicle	CNP (300 nM)	Vehicle	CNP (300 nM)	Vehicle	CNP (300 nM)
87.8356	114.293	111.838	96.4922	83.5091	90.3023
134.496	236.101	107.683	75.2872	126.327	86.942
82.5692	367.103	93.7143	100.27	98.2457	117.942
120.968	332.995	111.722	97.3796	94.3928	93.4592
77.5817	166.193	77.9213	99.0683	94.3571	93.5942
96.5492	114.972	97.1219	98.0526	103.169	87.6056
