# Supplementary material for: C-type natriuretic peptide facilitates autonomic Ca2+ entry in growth plate chondrocytes for stimulating bone growth
Source: eLife. 2022 Mar 15;11:e71931. doi: 10.7554/eLife.71931 (PMC8923661; doi:10.7554/eLife.71931)
Supplement: Figure 7—figure supplement 1—source data 1. [file elife-71931-fig7-figsupp1-data1.xlsx]

## Sheet: Figure 7-figure supplement 1
Figure 7-figure supplement 1
Wild-type
Length (mm)			Day0	Day3
	Wild-type	Vehicle	1.812	2.061
			1.774	2
			1.952	2.169
			1.815	2.055
			1.851	2.114
			1.914	2.137
			1.896	2.159
		CNP (30 nM)	1.811	2.239
			1.791	2.147
			1.883	2.292
			1.888	2.234
			1.837	2.215
			1.917	2.211
			1.941	2.373
Zone size (×105 mm2)			R	C	H
	Wild-type	Vehicle	0.984241	1.04387	1.38822
			1.02304	1.03442	1.23963
			0.918286	0.778368	1.02507
			0.806461	0.781563	0.952588
			0.915423	0.815562	1.02328
			0.839215	0.902177	1.58785
			0.887619	0.776833	1.24111
		CNP (30 nM)	0.923614	1.1948	1.04617
			1.09666	0.927675	1.12304
			0.655923	1.22279	1.12251
			0.865024	0.965029	1.06749
			0.984635	1.05257	1.34011
			0.962085	0.858868	1.24568
			0.945437	1.13741	0.894891
Area in C zone (×104 mm2)			Cell	ECM
	Wild-type	Vehicle	21213	83173.5
			20760	82682.1
			23832	54004.8
			19814	58342.3
			27348	54208.2
			30486	59731.7
			23528	54155.3
		CNP (30 nM)	23063	96417
			17706	75061.5
			33298	88981.4
			30562	65940.9
			30263	74994.4
			24676	61210.8
			36305	77435.7
Cell size (×102 mm2)			R	C	H
	Wild-type	Vehicle	46.8566	35.9519	246.103
			43.5986	32.3637	210.898
			48.7278	38.1536	235.122
			50.3993	48.5378	224.307
			48.1114	38.8037	191.473
			55.9802	38.3379	204.582
			46.2476	38.5754	208.842
		CNP (30 nM)	42.072	40.7654	199.014
			41.9449	40.7378	258.213
			48.7479	53.0007	292.49
			59.5668	58.025	265.825
			47.6474	38.7494	248.179
			48.229	41.6657	251.191
			51.4635	49.2449	233.224
Cell number /zone (×102)			R	C	H
	Wild-type	Vehicle	634	733	230
			721	756	227
			723	662	191
			558	711	189
			767	778	212
			675	708	277
			573	742	275
		CNP (30 nM)	629	816	200
			743	583	202
			529	743	208
			607	599	180
			745	897	237
			558	713	243
			766	960	186
