# Supplementary material for: C-type natriuretic peptide facilitates autonomic Ca2+ entry in growth plate chondrocytes for stimulating bone growth
Source: eLife. 2022 Mar 15;11:e71931. doi: 10.7554/eLife.71931 (PMC8923661; doi:10.7554/eLife.71931)
Supplement: Figure 7—source data 1. [file elife-71931-fig7-data1.xlsx]

## Sheet: 7A
Figure7A
Length (mm)			Day 0	Day 1	Day 2	Day 3
	Trpm7fl/fl, Col11a2-Cre-/-	Vehicle	2.003	2.103	2.192	2.27
			1.938	2.027	2.098	2.173
			1.74	1.844	1.923	1.994
			1.805	1.925	1.979	2.053
			1.906	2.026	2.073	2.157
			1.923	2.036	2.093	2.181
		CNP (30 nM)	1.913	2.105	2.227	2.322
			2.016	2.2	2.317	2.408
			1.78	1.944	2.05	2.16
			1.842	2.011	2.103	2.2
			1.867	2.025	2.12	2.214
			1.944	2.114	2.232	2.32
Zone size (×105 mm2)			R	C	H
	Trpm7fl/fl, Col11a2-Cre-/-	Vehicle	0.874843	0.426443	1.18819
			0.693435	0.446641	1.14162
			0.774921	0.476968	0.992089
		CNP (30 nM)	0.881701	0.617053	1.04512
			0.80283	0.58168	0.977093
			0.703867	0.614739	0.984215
Cell number /zone (×102)			R	C	H
	Trpm7fl/fl, Col11a2-Cre-/-	Vehicle	621	423	222
			497	402	275
			647	533	278
		CNP (30 nM)	584	492	201
			597	518	235
			670	527	271
