# Supplementary material for: C-type natriuretic peptide facilitates autonomic Ca2+ entry in growth plate chondrocytes for stimulating bone growth
Source: eLife. 2022 Mar 15;11:e71931. doi: 10.7554/eLife.71931 (PMC8923661; doi:10.7554/eLife.71931)
Supplement: Figure 7—source data 2. [file elife-71931-fig7-data2.xlsx]

## Sheet: 7B
Figure7B
Length (mm)			Day 0	Day 1	Day 2	Day 3
	Trpm7fl/fl, Col11a2-Cre+/-	Vehicle	1.54	1.62	1.681	1.736
			1.526	1.559	1.62	1.675
			1.514	1.566	1.602	1.65
			1.59	1.646	1.684	1.744
			1.564	1.614	1.665	1.698
			1.554	1.616	1.656	1.748
		CNP (30 nM)	1.536	1.619	1.686	1.749
			1.534	1.574	1.646	1.699
			1.491	1.55	1.602	1.642
			1.651	1.729	1.785	1.801
			1.522	1.594	1.62	1.679
			1.572	1.619	1.651	1.707
Zone size (×105 mm2)			R	C	H
	Trpm7fl/fl, Col11a2-Cre+/-	Vehicle	0.621316	0.24602	0.320308
			0.715689	0.330377	0.517269
			1.00709	0.317496	0.51023
			1.03905	0.391593	0.421438
		CNP (30 nM)	0.703676	0.273331	0.359763
			0.892843	0.281426	0.588689
			0.706321	0.35041	0.687935
			1.02726	0.321591	0.531087
Cell number /zone (×102)			R	C
	Trpm7fl/fl, Col11a2-Cre+/-	Vehicle	396	161
			636	289
			708	217
			788	260
		CNP (30 nM)	543	219
			697	224
			477	213
			661	201
