# Supplementary material for: C-type natriuretic peptide facilitates autonomic Ca2+ entry in growth plate chondrocytes for stimulating bone growth
Source: eLife. 2022 Mar 15;11:e71931. doi: 10.7554/eLife.71931 (PMC8923661; doi:10.7554/eLife.71931)
Supplement: Figure 8—source data 1. [file elife-71931-fig8-data1.xlsx]

## Sheet: 8A
Figure8A
Length (mm)			Day 0	Day 1	Day 2	Day 3	Day 4
	Wild-type	Vehicle	1.692	1.805	1.915	1.976	2.043
			1.694	1.818	1.911	2	2.047
			1.604	1.702	1.8	1.868	1.929
			1.761	1.758	1.829	1.914	1.952
			1.716	1.858	1.883	1.995	2.064
			1.732	1.828	1.914	1.975	2.047
			1.665	1.762	1.841	1.894	1.966
			1.753	1.847	1.946	2.028	2.117
			1.727	1.775	1.881	1.958	2.053
		NS1619 (30 mM)	1.745	1.892	2.011	2.083	2.166
			1.732	1.879	1.984	2.072	2.15
			1.621	1.793	1.879	1.946	2.042
			1.736	1.826	1.922	1.99	2.055
			1.681	1.79	1.885	1.975	2.075
			1.684	1.787	1.881	1.961	2.04
			1.7	1.793	1.9	2.001	2.05
			1.767	1.854	1.984	2.079	2.154
			1.711	1.828	1.941	2.023	2.107
